# Supplementary material for: Systems genetics in the rat HXB/BXH family identifies Tti2 as a pleiotropic quantitative trait gene for adult hippocampal neurogenesis and serum glucose
Source: PLoS Genet. 2022 Apr 4;18(4):e1009638. doi: 10.1371/journal.pgen.1009638 (PMC9060359; doi:10.1371/journal.pgen.1009638)
Supplement: S4 Data — Functions enriched among differentially expressed genes in SHR-Tti2+/- vs. wild type SHR rats in the hippocampus, liver, muscle and perirenal adipose tissue. IPA deduces the activation Z-scores from the direction and magnitude of the gene expression changes. (XLSX) [file pgen.1009638.s009.xlsx]

## Sheet: Hippocampus
# Ingenuity Pathway Analysis - Diseases and Functions - HIPPOCAMPUS
#
Categories	Function	Diseases or Functions Annotation	p-value	B-H p-value	Predicted Activation State	Activation z-score	Bias-corrected z-score	Molecules	# Molecules
Cell Death and Survival	apoptosis	Apoptosis	2.4e-06	0.000804		0.301	0.115	ACER2,BANP,DNAJB1,HSPA5,IL6R,RBM3,S1PR3,SLC6A6,ZBTB16	9
Cell Death and Survival	necrosis	Necrosis	2.41e-06	0.000804		0.08	-0.069	ACER2,BANP,DNAJB1,HSPA5,IL6R,RBM3,S1PR3,SLC6A6,ZBTB16	9
Digestive System Development and Function,Hepatic System Development and Function,Inflammatory Response,Organ Development	inflammatory response	Inflammatory response of liver	1.15e-05	0.00254				IL6R,ZBTB16	2
Cell Death and Survival	cell death	Cell death of tumor cell lines	1.92e-05	0.0032		0.881	0.764	ACER2,BANP,DNAJB1,HSPA5,IL6R,S1PR3,ZBTB16	7
Cell Death and Survival	apoptosis	Apoptosis of lymphoid cells	3.72e-05	0.00496		-0.312	-0.433	HSPA5,IL6R,SLC6A6,ZBTB16	4
Neurological Disease,Organismal Injury and Abnormalities,Psychological Disorders	disorder of basal ganglia	Disorder of basal ganglia	5.99e-05	0.00601				BANP,DNAJB1,HSPA5,IL6R,ZBTB16	5
Cell Death and Survival	apoptosis	Apoptosis of photoreceptors	6.54e-05	0.00601				HSPA5,S1PR3	2
Cell Death and Survival	apoptosis	Apoptosis of tumor cell lines	7.21e-05	0.00601		1.353	1.246	BANP,DNAJB1,HSPA5,IL6R,S1PR3,ZBTB16	6
Connective Tissue Disorders,Organismal Injury and Abnormalities,Skeletal and Muscular Disorders	abnormality	Abnormality of knee joint	8.57e-05	0.00635				IL6R,ZBTB16	2
Neurological Disease,Skeletal and Muscular Disorders	neuromuscular disease	Neuromuscular disease	0.000147	0.00947				BANP,DNAJB1,HSPA5,IL6R,ZBTB16	5
Organismal Injury and Abnormalities,Respiratory Disease	lung injury	Lung injury	0.000169	0.00947				HSPA5,IL6R,S1PR3	3
Cardiovascular System Development and Function,Cell Death and Survival	survival	Survival of vascular endothelial cells	0.000171	0.00947				HSPA5,S1PR3	2
Hereditary Disorder,Neurological Disease,Organismal Injury and Abnormalities,Psychological Disorders,Skeletal and Muscular Disorders	Huntington disease	Huntington Disease	0.000253	0.0115				BANP,DNAJB1,HSPA5,ZBTB16	4
Organismal Injury and Abnormalities	degeneration	Organ Degeneration	0.000273	0.0115		-0.428	-0.956	IL6R,S1PR3,SLC6A6,ZBTB16	4
Cellular Function and Maintenance	homeostasis	Cellular homeostasis	0.000285	0.0115		-1.693	-1.403	ACER2,DNAJB1,HSPA5,IL6R,S1PR3,ZBTB16	6
Cancer,Cell Cycle,Organismal Injury and Abnormalities	G0/G1 phase transition	G0/G1 phase transition of chronic lymphocytic leukemia cells	0.00044	0.0115				IL6R	1
Lipid Metabolism,Small Molecule Biochemistry	hydrolysis	Hydrolysis of D-erythro-C16-ceramide	0.00044	0.0115				ACER2	1
Cancer,Cellular Development,Organismal Injury and Abnormalities	immortalization	Immortalization of short-term hematopoietic stem cells	0.00044	0.0115				ZBTB16	1
DNA Replication, Recombination, and Repair	unwinding	Unwinding of origin of replication in the short region	0.00044	0.0115				DNAJB1	1
Cell Cycle,Gene Expression	binding	Binding of origin of replication in the short region	0.00044	0.0115				DNAJB1	1
Connective Tissue Disorders,Developmental Disorder,Hereditary Disorder,Neurological Disease,Organismal Injury and Abnormalities,Reproductive System Disease,Skeletal and Muscular Disorders	skeletal defects, genital hypoplasia, and mental retardation	Skeletal defects, genital hypoplasia, and mental retardation	0.00044	0.0115				ZBTB16	1
Lipid Metabolism,Molecular Transport,Small Molecule Biochemistry	concentration	Concentration of linoleic acid	0.00044	0.0115				HSPA5	1
Cancer,Cellular Development,Organismal Injury and Abnormalities	immortalization	Immortalization of long-term hematopoietic stem cells	0.00044	0.0115				ZBTB16	1
Cell Death and Survival	apoptosis	Apoptosis of T lymphocytes	0.000486	0.0115				IL6R,SLC6A6,ZBTB16	3
Immunological Disease,Inflammatory Disease,Inflammatory Response,Organismal Injury and Abnormalities,Respiratory Disease	allergic airway inflammation	Allergic airway inflammation	0.000501	0.0115				HSPA5,IL6R	2
Cell Death and Survival	cell death	Cell death of immune cells	0.00056	0.0115		-0.513	-0.418	HSPA5,IL6R,SLC6A6,ZBTB16	4
Hematological Disease,Infectious Diseases,Organismal Injury and Abnormalities	endotoxin shock response	Endotoxin shock response	0.000761	0.0115				IL6R,S1PR3	2
Cancer,Hematological Disease,Immunological Disease,Organismal Injury and Abnormalities	lymphocytic leukemia	Lymphocytic leukemia	0.000827	0.0115				HSPA5,IL6R,S1PR3,ZBTB16	4
Cellular Development,Cellular Growth and Proliferation,Hematological System Development and Function,Hematopoiesis	expansion	Expansion of hematopoietic cells	0.000842	0.0115				IL6R,ZBTB16	2
Cellular Movement	cellular infiltration	Cellular infiltration by myeloid cells	0.00086	0.0115				HSPA5,IL6R,ZBTB16	3
Nervous System Development and Function	neuroprotection	Neuroprotection of striatal interneurons	0.000879	0.0115				IL6R	1
Cellular Movement,Hematological System Development and Function,Immune Cell Trafficking	egression	Egression of germinal center B lymphocytes	0.000879	0.0115				S1PR3	1
Cellular Movement	positioning	Positioning of dendritic cells	0.000879	0.0115				S1PR3	1
Immunological Disease	cytokine release syndrome	Severe cytokine release syndrome	0.000879	0.0115				IL6R	1
Skeletal and Muscular System Development and Function	resorption	Resorption of bone matrix	0.000879	0.0115				IL6R	1
Cell Cycle,DNA Replication, Recombination, and Repair	modulation	Modulation of chromatin	0.000879	0.0115				BANP	1
Hematological System Development and Function,Hematopoiesis,Lymphoid Tissue Structure and Development,Tissue Morphology	quantity	Quantity of promyelocytes	0.000879	0.0115				ZBTB16	1
Organismal Development,Tissue Development	formation	Formation of blood vessel lumen	0.000879	0.0115				S1PR3	1
Cell Cycle,Hepatic System Development and Function	cell cycle progression	Delay in initiation of cell cycle progression of hepatocytes	0.000879	0.0115				IL6R	1
Cell Death and Survival	apoptosis	Apoptosis of lamina propria T lymphocytes	0.000879	0.0115				IL6R	1
Inflammatory Response	inflammatory response	Inflammatory response of spleen	0.000879	0.0115				ZBTB16	1
Cardiovascular Disease,Cardiovascular System Development and Function,Cell Morphology,Organ Morphology,Organismal Development,Organismal Injury and Abnormalities,Skeletal and Muscular Disorders,Skeletal and Muscular System Development and Function,Tissue Morphology	hypertrophy	Hypertrophy of ventricular myocardium	0.000879	0.0115				IL6R	1
Dermatological Diseases and Conditions,Organismal Injury and Abnormalities	pain	Pain of skin	0.000879	0.0115				IL6R	1
Skeletal and Muscular System Development and Function	fusion	Fusion of metatarsal bone	0.000879	0.0115				ZBTB16	1
Immunological Disease,Inflammatory Disease,Inflammatory Response,Organismal Injury and Abnormalities,Respiratory Disease	lymphocytic alveolitis	Lymphocytic alveolitis	0.000879	0.0115				IL6R	1
Lipid Metabolism,Small Molecule Biochemistry	hydrolysis	Hydrolysis of N-acetylsphingosine	0.000879	0.0115				ACER2	1
Cell Morphology,Cellular Compromise,Organismal Injury and Abnormalities	swelling	Swelling of astrocyte endfeet	0.000879	0.0115				IL6R	1
Cell Death and Survival	apoptosis	Apoptosis of mucosal-associated invariant T lymphocytes	0.000879	0.0115				ZBTB16	1
Cell-mediated Immune Response,Cellular Development,Cellular Function and Maintenance,Cellular Growth and Proliferation,Embryonic Development,Hematological System Development and Function,Hematopoiesis,Lymphoid Tissue Structure and Development,Organ Development,Organismal Development,Tissue Development	development	Development of type II natural killer T cells	0.000879	0.0115				ZBTB16	1
Neurological Disease,Ophthalmic Disease	demyelination	Demyelination of optic nerve	0.000879	0.0115				HSPA5	1
Tissue Morphology	extension	Delay in initiation of extension of epithelial tissue	0.000879	0.0115				S1PR3	1
Digestive System Development and Function,Hepatic System Development and Function,Organ Development	response	Response of liver	0.00102	0.0129				HSPA5,IL6R,ZBTB16	3
Lymphoid Tissue Structure and Development,Tissue Morphology	quantity	Quantity of lymphatic system cells	0.00118	0.0129				IL6R,S1PR3,SLC6A6,ZBTB16	4
Connective Tissue Disorders,Organismal Injury and Abnormalities,Skeletal and Muscular Disorders	damage	Damage of knee joint	0.00132	0.0129				IL6R	1
Cell Cycle,Hematological System Development and Function,Humoral Immune Response	cell division	Delay in cell division of memory B cells	0.00132	0.0129				ZBTB16	1
Cellular Movement,Hematological System Development and Function,Immune Cell Trafficking,Inflammatory Response	cellular infiltration	Cellular infiltration by inflammatory monocytes	0.00132	0.0129				IL6R	1
Post-Translational Modification	disulfide bonding	Disulfide bonding of protein	0.00132	0.0129				HSPA5	1
Cellular Development,Cellular Growth and Proliferation	colony formation	Colony formation of mesothelioma cell lines	0.00132	0.0129				ZBTB16	1
Infectious Diseases	quantity	Quantity of flavivirus	0.00132	0.0129				HSPA5	1
Organ Morphology,Organismal Functions,Organismal Injury and Abnormalities,Tissue Morphology	wound closure	Wound closure of skin	0.00132	0.0129				IL6R	1
Molecular Transport	accumulation	Accumulation of chloride	0.00132	0.0129				IL6R	1
Cell-mediated Immune Response,Cellular Development,Cellular Function and Maintenance,Cellular Growth and Proliferation,Embryonic Development,Hematological System Development and Function,Hematopoiesis,Lymphoid Tissue Structure and Development,Organ Development,Organismal Development,Tissue Development	commitment	Commitment of Th17 cells	0.00132	0.0129				IL6R	1
Cancer,Organismal Injury and Abnormalities	Castleman disease	Castleman disease	0.00132	0.0129				IL6R	1
Gene Expression	expression	Expression of hnRNA	0.00132	0.0129				IL6R	1
Cell-mediated Immune Response,Cellular Development,Cellular Function and Maintenance,Cellular Growth and Proliferation,Embryonic Development,Hematological System Development and Function,Hematopoiesis,Lymphoid Tissue Structure and Development,Organ Development,Organismal Development,Tissue Development	development	Development of innate T lymphocytes	0.00132	0.0129				ZBTB16	1
Cell-mediated Immune Response,Cellular Development,Cellular Function and Maintenance,Cellular Growth and Proliferation,Embryonic Development,Hematological System Development and Function,Hematopoiesis,Lymphoid Tissue Structure and Development,Organ Development,Organismal Development,Tissue Development	commitment	Commitment of CD4+ T-lymphocytes	0.00132	0.0129				IL6R	1
Connective Tissue Disorders,Metabolic Disease,Organismal Injury and Abnormalities	lipoatrophy	Lipoatrophy of mice	0.00132	0.0129				HSPA5	1
Cancer,Organismal Injury and Abnormalities	liquid tumor	Liquid tumor	0.00132	0.0129				ACER2,CHORDC1,HSPA5,IL6R,S1PR3,ZBTB16	6
Lipid Metabolism,Small Molecule Biochemistry	synthesis	Synthesis of lipid	0.00135	0.013				ACER2,HSPA5,S1PR3,SLC6A6	4
Cell-mediated Immune Response,Cellular Development,Cellular Function and Maintenance,Cellular Growth and Proliferation,Embryonic Development,Hematological System Development and Function,Hematopoiesis,Lymphoid Tissue Structure and Development,Organ Development,Organismal Development,Tissue Development	differentiation	Differentiation of T lymphocytes	0.00151	0.0136				DNAJB1,IL6R,ZBTB16	3
Cell Death and Survival	cell viability	Cell viability	0.00152	0.0136		0.399	0.932	ACER2,HSPA5,IL6R,S1PR3,ZBTB16	5
Cell Death and Survival	apoptosis	Apoptosis of neuroblastoma cell lines	0.00159	0.0136				DNAJB1,HSPA5	2
Cell-To-Cell Signaling and Interaction	binding	Binding of tumor cell lines	0.00162	0.0136				HSPA5,IL6R,ZBTB16	3
Cancer,Connective Tissue Disorders,Organismal Injury and Abnormalities,Skeletal and Muscular Disorders	hyperplasia	Hyperplasia of synovial cells	0.00176	0.0136				IL6R	1
Cancer,Organismal Injury and Abnormalities	malignancy	Malignancy of acute leukemia cells	0.00176	0.0136				ZBTB16	1
Connective Tissue Development and Function,Connective Tissue Disorders,Organ Morphology,Organismal Development,Organismal Injury and Abnormalities,Skeletal and Muscular Disorders,Skeletal and Muscular System Development and Function,Tissue Development	lack	Lack of fibula	0.00176	0.0136				ZBTB16	1
Nervous System Development and Function,Organ Morphology	organization	Organization of cerebellum	0.00176	0.0136				HSPA5	1
Cancer,Cellular Development,Organismal Injury and Abnormalities,Tumor Morphology	differentiation	Arrest in differentiation of acute leukemia cells	0.00176	0.0136				ZBTB16	1
Connective Tissue Development and Function,Connective Tissue Disorders,Organ Morphology,Organismal Development,Organismal Injury and Abnormalities,Skeletal and Muscular Disorders,Skeletal and Muscular System Development and Function,Tissue Development	abnormal morphology	Abnormal morphology of talus	0.00176	0.0136				ZBTB16	1
Connective Tissue Development and Function,Connective Tissue Disorders,Organismal Injury and Abnormalities,Skeletal and Muscular Disorders,Skeletal and Muscular System Development and Function,Tissue Development	abnormal morphology	Abnormal morphology of xiphoid process foramen	0.00176	0.0136				ZBTB16	1
Cancer,Cellular Growth and Proliferation,Organismal Injury and Abnormalities,Tumor Morphology	cytostasis	Cytostasis of leukemia cells	0.00176	0.0136				ZBTB16	1
Connective Tissue Development and Function,Organ Morphology,Organismal Development,Skeletal and Muscular System Development and Function,Tissue Development,Tissue Morphology	diameter	Diameter of fibula	0.00176	0.0136				ZBTB16	1
Cell-To-Cell Signaling and Interaction,Cellular Growth and Proliferation,Hematological System Development and Function	suppression	Suppression of Th2 cells	0.00176	0.0136				IL6R	1
Organismal Injury and Abnormalities	exudate	Exudate	0.00176	0.0136				IL6R	1
Connective Tissue Disorders,Immunological Disease,Inflammatory Disease,Inflammatory Response,Organismal Injury and Abnormalities,Skeletal and Muscular Disorders	highly active rheumatoid arthritis	Highly active rheumatoid arthritis	0.00176	0.0136				IL6R	1
Cell Morphology	alignment	Alignment of endothelial cells	0.00176	0.0136				S1PR3	1
Cellular Development,Cellular Growth and Proliferation	development	Development of tumor cell lines	0.00182	0.0139				IL6R,S1PR3,ZBTB16	3
Organismal Injury and Abnormalities,Respiratory Disease	asbestosis	Asbestosis	0.0022	0.0154				HSPA5	1
Cellular Assembly and Organization	accumulation	Accumulation of cytoplasmic aggregates	0.0022	0.0154				DNAJB1	1
Connective Tissue Disorders,Immunological Disease,Inflammatory Disease,Inflammatory Response,Organismal Injury and Abnormalities,Skeletal and Muscular Disorders	juvenile seronegative polyarthritis	Juvenile seronegative polyarthritis	0.0022	0.0154				IL6R	1
Cardiovascular Disease,Cardiovascular System Development and Function,Organ Morphology,Organismal Development,Organismal Injury and Abnormalities	abnormal morphology	Abnormal morphology of myocardial cuff	0.0022	0.0154				SLC6A6	1
Auditory Disease,Cell Death and Survival,Cellular Compromise,Neurological Disease,Organismal Injury and Abnormalities,Tissue Morphology	degeneration	Degeneration of vestibular hair cells	0.0022	0.0154				S1PR3	1
Connective Tissue Disorders,Immunological Disease,Inflammatory Disease,Inflammatory Response,Organismal Injury and Abnormalities,Skeletal and Muscular Disorders	rheumatoid factor-positive polyarticular juvenile idiopathic arthritis	Rheumatoid factor-positive polyarticular juvenile idiopathic arthritis	0.0022	0.0154				IL6R	1
Connective Tissue Disorders,Inflammatory Disease,Organismal Injury and Abnormalities,Skeletal and Muscular Disorders	systemic rheumatic disease	Systemic rheumatic disease	0.0022	0.0154				IL6R	1
Amino Acid Metabolism,Molecular Transport,Small Molecule Biochemistry	transport	Transport of beta-alanine	0.0022	0.0154				SLC6A6	1
Cellular Development	differentiation	Differentiation of central nervous system cells	0.00221	0.0154				IL6R,S1PR3	2
Cardiovascular Disease,Organismal Injury and Abnormalities	peripheral arterial disease	Advanced stage peripheral arterial disease	0.00227	0.0155				CHORDC1,DNAJB1	2
Cell Cycle	S phase	Entry into S phase	0.00229	0.0155				IL6R,ZBTB16	2
Hematological System Development and Function,Tissue Morphology	quantity	Quantity of leukocytes	0.00233	0.0155				IL6R,S1PR3,SLC6A6,ZBTB16	4
Cardiovascular Disease,Organismal Injury and Abnormalities	peripheral vascular disease	Peripheral vascular disease	0.00241	0.0155				CHORDC1,DNAJB1,SLC6A6	3
Lipid Metabolism,Small Molecule Biochemistry	metabolism	Metabolism of membrane lipid derivative	0.00257	0.0155				ACER2,HSPA5,SLC6A6	3
Cell Death and Survival	cell viability	Cell viability of tumor cell lines	0.00263	0.0155				ACER2,HSPA5,IL6R,ZBTB16	4
Neurological Disease,Organismal Injury and Abnormalities	demyelination	Demyelination of cerebellum	0.00264	0.0155				HSPA5	1
Skeletal and Muscular Disorders	polymyalgia rheumatica-like syndrome	Polymyalgia rheumatica-like syndrome	0.00264	0.0155				IL6R	1
Lipid Metabolism,Small Molecule Biochemistry	catabolism	Catabolism of ceramide	0.00264	0.0155				ACER2	1
Auditory Disease,Neurological Disease,Organismal Injury and Abnormalities	degeneration	Degeneration of macula of saccule	0.00264	0.0155				S1PR3	1
Developmental Disorder,Hereditary Disorder,Metabolic Disease,Neurological Disease,Organismal Injury and Abnormalities	Sandhoff disease	Sandhoff disease	0.00264	0.0155				S1PR3	1
Organismal Injury and Abnormalities,Skeletal and Muscular Disorders	pain	Pain of hindpaw	0.00264	0.0155				IL6R	1
Cellular Movement,Hematological System Development and Function,Humoral Immune Response,Immune Cell Trafficking,Inflammatory Response,Lymphoid Tissue Structure and Development	chemotaxis	Chemotaxis of marginal-zone B lymphocytes	0.00264	0.0155				S1PR3	1
Cell-mediated Immune Response,Cellular Development,Cellular Function and Maintenance,Cellular Growth and Proliferation,Embryonic Development,Hematological System Development and Function,Hematopoiesis,Lymphoid Tissue Structure and Development,Organ Development,Organ Morphology,Organismal Development,Tissue Development,Tissue Morphology	expansion	Expansion of innate-like lymphocytes	0.00264	0.0155				ZBTB16	1
Connective Tissue Disorders,Immunological Disease,Inflammatory Disease,Inflammatory Response,Organismal Injury and Abnormalities,Skeletal and Muscular Disorders	systemic juvenile idiopathic arthritis	Active stage systemic juvenile idiopathic arthritis	0.00264	0.0155				IL6R	1
Amino Acid Metabolism,Molecular Transport,Small Molecule Biochemistry	quantity	Quantity of taurine	0.00264	0.0155				SLC6A6	1
Cell-To-Cell Signaling and Interaction,Digestive System Development and Function,Hepatic System Development and Function,Inflammatory Response,Organ Development	inflammatory response	Inflammatory response of Kupffer cells	0.00264	0.0155				IL6R	1
Cancer,Organismal Injury and Abnormalities,Tumor Morphology	invasion	Invasion of malignant tumor	0.00266	0.0155				HSPA5,ZBTB16	2
Cell Morphology,Cellular Function and Maintenance	autophagy	Autophagy	0.00282	0.0158				ACER2,HSPA5,S1PR3	3
Cellular Development,Cellular Growth and Proliferation,Nervous System Development and Function	proliferation	Proliferation of neuroglia	0.00293	0.0158				IL6R,S1PR3	2
Endocrine System Disorders,Organismal Injury and Abnormalities	benign thyroid disease	Benign thyroid disease	0.00296	0.0158				HSPA5,IL6R	2
Cellular Movement	cell movement	Cell movement of blood cells	0.00304	0.0158		0.517	0.831	HSPA5,IL6R,S1PR3,ZBTB16	4
Cell Morphology	lack	Lack of stereocilia	0.00308	0.0158				S1PR3	1
Cellular Development,Cellular Growth and Proliferation,Connective Tissue Development and Function,Hematological System Development and Function,Hematopoiesis,Organismal Development,Tissue Development	erythropoiesis	Erythropoiesis of erythroid cells	0.00308	0.0158				IL6R	1
Connective Tissue Disorders,Immunological Disease,Inflammatory Disease,Inflammatory Response,Organismal Injury and Abnormalities,Skeletal and Muscular Disorders	polyarticular juvenile rheumatoid arthritis	Active stage polyarticular juvenile rheumatoid arthritis	0.00308	0.0158				IL6R	1
Cellular Development,Cellular Growth and Proliferation	growth	Arrest in growth of melanoma cell lines	0.00308	0.0158				IL6R	1
Connective Tissue Disorders,Immunological Disease,Inflammatory Disease,Inflammatory Response,Organismal Injury and Abnormalities,Skeletal and Muscular Disorders	rheumatoid arthritis	Progressive rheumatoid arthritis	0.00308	0.0158				IL6R	1
Cancer,Cell Cycle,Organismal Injury and Abnormalities	S phase	Entry into S phase of Kaposi's sarcoma cells	0.00308	0.0158				IL6R	1
Connective Tissue Development and Function,Connective Tissue Disorders,Developmental Disorder,Organ Morphology,Organismal Development,Organismal Injury and Abnormalities,Skeletal and Muscular Disorders,Skeletal and Muscular System Development and Function,Tissue Development	lack	Lack of patella	0.00308	0.0158				ZBTB16	1
Amino Acid Metabolism,Molecular Transport,Small Molecule Biochemistry	transport	Transport of taurine	0.00308	0.0158				SLC6A6	1
Cellular Compromise,Cellular Function and Maintenance	endoplasmic reticulum stress response	Endoplasmic reticulum stress response of hepatoma cell lines	0.00308	0.0158				HSPA5	1
Cancer,Cellular Development,Cellular Growth and Proliferation,Organismal Injury and Abnormalities,Tumor Morphology	proliferation	Proliferation of Kaposi's sarcoma cells	0.00308	0.0158				IL6R	1
Neurological Disease	demyelination	Demyelination of white matter	0.00308	0.0158				HSPA5	1
Auditory Disease,Organismal Injury and Abnormalities	degeneration	Degeneration of macula of utricle	0.00308	0.0158				S1PR3	1
Cellular Development,Cellular Growth and Proliferation,Hematological System Development and Function,Lymphoid Tissue Structure and Development	expansion	Expansion of T lymphocytes	0.00331	0.0168				IL6R,ZBTB16	2
Cell Cycle,Gene Expression	binding	Binding of DNA	0.00333	0.0168				BANP,DNAJB1,IL6R	3
Cell Morphology,Cellular Development,Tissue Development	tubulation	Tubulation of skin cell lines	0.00351	0.0173				S1PR3	1
Cell Death and Survival	survival	Survival of hepatic stellate cells	0.00351	0.0173				IL6R	1
Cell Cycle,Reproductive System Development and Function	cell division	Cell division of male germ cells	0.00351	0.0173				ZBTB16	1
Organismal Development	growth	Growth of vessel	0.00364	0.0178				IL6R,S1PR3	2
Cell Cycle	cell cycle progression	Cell cycle progression	0.00382	0.0179				BANP,IL6R,RBM3,ZBTB16	4
Cellular Compromise,Cellular Function and Maintenance	endoplasmic reticulum stress response	Endoplasmic reticulum stress response	0.00388	0.0179				DNAJB1,HSPA5	2
Connective Tissue Disorders,Inflammatory Disease,Organismal Injury and Abnormalities,Skeletal and Muscular Disorders	polymyalgia rheumatica	Polymyalgia rheumatica	0.00395	0.0179				IL6R	1
Infectious Diseases	infection	Infection by Marburg virus	0.00395	0.0179				HSPA5	1
Cell Death and Survival	apoptosis	Apoptosis of invariant natural killer T cells	0.00395	0.0179				ZBTB16	1
Protein Degradation,Protein Synthesis	damage	Damage of protein	0.00395	0.0179				HSPA5	1
Connective Tissue Disorders,Inflammatory Response,Organismal Injury and Abnormalities,Skeletal and Muscular Disorders	swelling	Swelling of knee joint	0.00395	0.0179				IL6R	1
Nervous System Development and Function	function	Function of vestibular system	0.00395	0.0179				S1PR3	1
Cellular Growth and Proliferation	cytostasis	Cytostasis of melanoma cell lines	0.00395	0.0179				IL6R	1
Neurological Disease	hypomyelination	Hypomyelination of sciatic nerve	0.00395	0.0179				HSPA5	1
Cell Morphology,Hair and Skin Development and Function	cell rounding	Cell rounding of epithelial cell lines	0.00395	0.0179				S1PR3	1
Dermatological Diseases and Conditions,Organismal Injury and Abnormalities	psoriasis	Psoriasis	0.00415	0.0182				HSPA5,IL6R,ZBTB16	3
Cardiovascular System Development and Function,Organ Morphology,Organismal Development	enlargement	Enlargement of heart ventricle	0.0042	0.0182				IL6R,SLC6A6	2
Cellular Assembly and Organization	binding	Binding of ribosome	0.00439	0.0182				HSPA5	1
Auditory Disease,Organismal Injury and Abnormalities,Tissue Morphology	degeneration	Degeneration of supporting cell layer of inner ear	0.00439	0.0182				S1PR3	1
Inflammatory Response	CD4 T-cell response	CD4 T-cell response	0.00439	0.0182				SLC6A6	1
Cellular Compromise,Cellular Function and Maintenance	endoplasmic reticulum stress response	Endoplasmic reticulum stress response of cervical cancer cell lines	0.00439	0.0182				HSPA5	1
Drug Metabolism,Endocrine System Development and Function,Lipid Metabolism,Small Molecule Biochemistry	binding	Binding of progesterone	0.00439	0.0182				DNAJB1	1
Cell Death and Survival,Cell Morphology,Nervous System Development and Function,Neurological Disease	loss	Loss of oligodendrocytes	0.00439	0.0182				HSPA5	1
Cellular Function and Maintenance,Hair and Skin Development and Function	melanogenesis	Melanogenesis of melanoma cell lines	0.00439	0.0182				IL6R	1
Post-Translational Modification,Protein Trafficking	binding	Binding of protein fragment	0.00439	0.0182				HSPA5	1
Inflammatory Response	memory T cell response	Memory T cell response	0.00439	0.0182				SLC6A6	1
Cellular Assembly and Organization	expansion	Expansion of endoplasmic reticulum	0.00439	0.0182				HSPA5	1
Cardiovascular Disease,Inflammatory Disease,Inflammatory Response,Organismal Injury and Abnormalities	Takayasu arteritis	Takayasu arteritis	0.00439	0.0182				IL6R	1
Cellular Development,Nervous System Development and Function,Tissue Development	differentiation	Differentiation of cortical neurons	0.00439	0.0182				IL6R	1
Cardiovascular System Development and Function,Cellular Movement	migration	Migration of vascular endothelial cells	0.00453	0.0186				HSPA5,S1PR3	2
Cellular Assembly and Organization,Cellular Compromise,Nervous System Development and Function	retraction	Retraction of dendrites	0.00483	0.0187				IL6R	1
Cell Morphology,Renal and Urological System Development and Function	cell rounding	Cell rounding of kidney cell lines	0.00483	0.0187				S1PR3	1
Cardiovascular Disease,Inflammatory Disease,Inflammatory Response,Organismal Injury and Abnormalities	giant cell arteritis	Giant cell arteritis	0.00483	0.0187				IL6R	1
Cellular Movement,Hematological System Development and Function,Humoral Immune Response,Immune Cell Trafficking	migration	Migration of marginal-zone B lymphocytes	0.00483	0.0187				S1PR3	1
Cell-mediated Immune Response,Cellular Development,Cellular Function and Maintenance,Cellular Growth and Proliferation,Embryonic Development,Hematological System Development and Function,Hematopoiesis,Lymphoid Tissue Structure and Development,Organ Development,Organismal Development,Tissue Development	development	Development of CD4+ T-lymphocytes	0.00483	0.0187				IL6R	1
Connective Tissue Development and Function,Connective Tissue Disorders,Organ Morphology,Organismal Development,Organismal Injury and Abnormalities,Skeletal and Muscular Disorders,Skeletal and Muscular System Development and Function,Tissue Development	abnormal morphology	Abnormal morphology of tarsal bone	0.00483	0.0187				ZBTB16	1
Lipid Metabolism,Small Molecule Biochemistry	synthesis	Synthesis of D-sphingosine	0.00483	0.0187				ACER2	1
Nutritional Disease,Organismal Injury and Abnormalities	cancer cachexia	Cancer cachexia	0.00483	0.0187				HSPA5	1
Organ Morphology,Skeletal and Muscular System Development and Function	number	Number of thoracic vertebra	0.00483	0.0187				ZBTB16	1
Nervous System Development and Function,Visual System Development and Function	closure	Closure of eyelid	0.00483	0.0187				S1PR3	1
Metabolic Disease,Neurological Disease,Organismal Injury and Abnormalities,Psychological Disorders	Alzheimer disease	Alzheimer disease	0.00498	0.0192				HSPA5,IL6R,SLC6A6	3
Tissue Morphology	quantity	Quantity of cells	0.00506	0.0193		0.157	0.461	HSPA5,IL6R,S1PR3,SLC6A6,ZBTB16	5
Cancer	hyperplasia	Hyperplasia of tissue	0.00507	0.0193				IL6R,ZBTB16	2
Cancer,Organismal Injury and Abnormalities	neoplasia	Neoplasia of cells	0.00525	0.0194				ACER2,BANP,CHORDC1,HSPA5,IL6R,S1PR3,SLC6A6,ZBTB16	8
Cellular Development,Cellular Growth and Proliferation,Hematological System Development and Function,Hematopoiesis,Lymphoid Tissue Structure and Development,Tissue Development	colony formation	Colony formation of colony-forming units granulocytes	0.00527	0.0194				IL6R	1
Cellular Development,Cellular Growth and Proliferation	outgrowth	Outgrowth of neuroblastoma cell lines	0.00527	0.0194				IL6R	1
Cell Morphology,Embryonic Development	cell rounding	Cell rounding of embryonic cell lines	0.00527	0.0194				S1PR3	1
Hereditary Disorder,Neurological Disease,Organismal Injury and Abnormalities,Skeletal and Muscular Disorders	Nonaka myopathy	Nonaka myopathy	0.00527	0.0194				HSPA5	1
Cellular Development,Cellular Growth and Proliferation,Hematological System Development and Function,Hematopoiesis,Tissue Development	hematopoiesis	Hematopoiesis of stem cells	0.00527	0.0194				IL6R	1
Cellular Movement,Hematological System Development and Function,Immune Cell Trafficking,Inflammatory Response	cell movement	Cell movement of phagocytes	0.00546	0.02				HSPA5,IL6R,S1PR3	3
Free Radical Scavenging,Molecular Transport	quantity	Quantity of reactive oxygen species	0.00556	0.0201				DNAJB1,ZBTB16	2
Cell Signaling,Molecular Transport,Small Molecule Biochemistry,Vitamin and Mineral Metabolism	release	Release of Ca2+	0.00556	0.0201				IL6R,S1PR3	2
Dermatological Diseases and Conditions,Organismal Injury and Abnormalities	plaque psoriasis	Moderate plaque psoriasis	0.0057	0.0201				IL6R	1
Connective Tissue Development and Function,Connective Tissue Disorders,Organ Morphology,Organismal Development,Organismal Injury and Abnormalities,Skeletal and Muscular Disorders,Skeletal and Muscular System Development and Function,Tissue Development	abnormal morphology	Abnormal morphology of metatarsal bone	0.0057	0.0201				ZBTB16	1
Cell Morphology	morphology	Morphology of melanoma cell lines	0.0057	0.0201				IL6R	1
Cancer,Cellular Development,Organismal Injury and Abnormalities	immortalization	Immortalization of myeloid progenitor cells	0.0057	0.0201				ZBTB16	1
Cancer,Skeletal and Muscular Disorders,Tissue Morphology	transformation	Transformation of sacral vertebra	0.0057	0.0201				ZBTB16	1
Cellular Development,Cellular Growth and Proliferation	proliferation	Proliferation of myeloid cells	0.00573	0.0201				IL6R,ZBTB16	2
Cellular Development,Cellular Growth and Proliferation,Hematological System Development and Function,Lymphoid Tissue Structure and Development	cell proliferation	Cell proliferation of T lymphocytes	0.00587	0.0205				HSPA5,IL6R,ZBTB16	3
Cell-mediated Immune Response,Cellular Development,Cellular Function and Maintenance,Cellular Growth and Proliferation,Embryonic Development,Hematological System Development and Function,Hematopoiesis,Lymphoid Tissue Structure and Development,Organ Development,Organismal Development,Tissue Development	differentiation	Differentiation of natural killer T lymphocytes	0.00614	0.0205				ZBTB16	1
Cellular Function and Maintenance	endocytosis	Endocytosis by fibroblast cell lines	0.00614	0.0205				HSPA5	1
Organ Morphology,Skeletal and Muscular System Development and Function	number	Number of caudal vertebra	0.00614	0.0205				ZBTB16	1
Gene Expression	replication	Replication of RNA	0.00614	0.0205				HSPA5	1
Hematological System Development and Function,Immunological Disease,Lymphoid Tissue Structure and Development,Organ Morphology,Organismal Development,Organismal Injury and Abnormalities,Tissue Morphology	abnormal morphology	Abnormal morphology of enlarged mesenteric lymph node	0.00614	0.0205				S1PR3	1
Cancer,Cellular Movement,Organismal Injury and Abnormalities,Tumor Morphology	invasion	Invasion of melanoma cells	0.00614	0.0205				ZBTB16	1
Inflammatory Response	inflammatory infiltrate	Inflammatory infiltrate	0.00614	0.0205				IL6R	1
Embryonic Development,Organismal Development,Tissue Development	development	Development of mesonephros	0.00614	0.0205				ZBTB16	1
Connective Tissue Disorders,Immunological Disease,Inflammatory Disease,Inflammatory Response,Organismal Injury and Abnormalities,Skeletal and Muscular Disorders	oligoarticular juvenile idiopathic arthritis	Oligoarticular juvenile idiopathic arthritis	0.00614	0.0205				IL6R	1
Cell Death and Survival	cell viability	Cell viability of mesothelioma cell lines	0.00658	0.0217				ZBTB16	1
Molecular Transport,Small Molecule Biochemistry	secretion	Secretion of lactic acid	0.00658	0.0217				HSPA5	1
Cell Morphology,Cellular Function and Maintenance	transmembrane potential	Transmembrane potential of mitochondria	0.00668	0.0219				DNAJB1,ZBTB16	2
Cell Death and Survival,Cellular Development,Digestive System Development and Function,Hepatic System Development and Function,Organ Morphology	regeneration	Regeneration of liver cells	0.00702	0.0227				IL6R	1
Cellular Assembly and Organization,Cellular Compromise,DNA Replication, Recombination, and Repair	formation	Formation of nuclear inclusions	0.00702	0.0227				DNAJB1	1
Cell-To-Cell Signaling and Interaction,Hematological System Development and Function,Immune Cell Trafficking,Inflammatory Response	activation	Activation of TREG cells	0.00702	0.0227				IL6R	1
Cardiovascular System Development and Function,Cell Morphology,Organ Morphology,Organismal Development,Skeletal and Muscular System Development and Function,Tissue Morphology	morphology	Morphology of cardiomyocytes	0.00714	0.023				IL6R,SLC6A6	2
Cancer,Hematological Disease,Immunological Disease,Organismal Injury and Abnormalities	leukemia	Leukemia	0.0074	0.0233				ACER2,HSPA5,IL6R,S1PR3,ZBTB16	5
Connective Tissue Disorders,Immunological Disease,Inflammatory Disease,Inflammatory Response,Organismal Injury and Abnormalities,Skeletal and Muscular Disorders	active rheumatoid arthritis	Severe active rheumatoid arthritis	0.00745	0.0233				IL6R	1
Cellular Movement	migration	Migration of fibroblast-like synoviocytes	0.00745	0.0233				S1PR3	1
Cell Morphology	morphology	Morphology of lymphoma cell lines	0.00745	0.0233				ZBTB16	1
Cardiovascular Disease,Metabolic Disease,Neurological Disease,Organismal Injury and Abnormalities,Psychological Disorders	cerebral amyloid angiopathy	Cerebral amyloid angiopathy	0.00745	0.0233				SLC6A6	1
Cellular Development,Cellular Growth and Proliferation,Organ Development,Reproductive System Development and Function	proliferation	Proliferation of spermatogonia	0.00745	0.0233				ZBTB16	1
Lipid Metabolism,Small Molecule Biochemistry	synthesis	Synthesis of phospholipid	0.00766	0.0238				HSPA5,SLC6A6	2
Cell Morphology,Organ Morphology,Skeletal and Muscular Disorders,Skeletal and Muscular System Development and Function,Tissue Morphology	abnormal morphology	Abnormal morphology of myofiber	0.00789	0.0243				SLC6A6	1
Inflammatory Disease,Neurological Disease,Ophthalmic Disease,Organismal Injury and Abnormalities	Devic syndrome	Devic syndrome	0.00789	0.0243				IL6R	1
Cancer,Hematological Disease,Organismal Injury and Abnormalities	neoplasia	Neoplasia of blood cells	0.00831	0.0251				ACER2,CHORDC1,HSPA5,IL6R,S1PR3,ZBTB16	6
Connective Tissue Development and Function,Tissue Development	accumulation	Accumulation of fibroblasts	0.00833	0.0251				IL6R	1
Cell Cycle	cell cycle progression	Cell cycle progression of melanoma cell lines	0.00833	0.0251				BANP	1
Cellular Development,Cellular Growth and Proliferation,Hematological System Development and Function	colony formation	Colony formation of erythroid cell lines	0.00833	0.0251				IL6R	1
Cell Death and Survival	apoptosis	Apoptosis of microglia	0.00833	0.0251				IL6R	1
Cellular Movement,Nervous System Development and Function	migration	Migration of nervous tissue cell lines	0.00876	0.0258				S1PR3	1
Cell Morphology	shape change	Shape change of melanoma cell lines	0.00876	0.0258				IL6R	1
Cellular Development,Cellular Growth and Proliferation,Hematological System Development and Function,Lymphoid Tissue Structure and Development	expansion	Expansion of TREG cells	0.00876	0.0258				IL6R	1
Cell Death and Survival,Embryonic Development	apoptosis	Apoptosis of embryoblast	0.00876	0.0258				HSPA5	1
Cell Morphology,Endocrine System Disorders,Organ Morphology,Organismal Injury and Abnormalities,Reproductive System Development and Function,Reproductive System Disease	abnormal morphology	Abnormal morphology of spermatogonia	0.00876	0.0258				ZBTB16	1
Infectious Diseases	infection	Infection of epithelial cell lines	0.00896	0.0262				CHORDC1,HSPA5	2
Inflammatory Disease,Neurological Disease	inflammatory demyelinating disease	Inflammatory demyelinating disease	0.00906	0.0262				HSPA5,IL6R	2
Cell Morphology	morphology	Morphology of tumor cell lines	0.00916	0.0262				IL6R,ZBTB16	2
Endocrine System Disorders,Immunological Disease,Metabolic Disease,Organismal Injury and Abnormalities	Graves ophthalmopathy	Graves ophthalmopathy	0.0092	0.0262				IL6R	1
Hematological Disease,Infectious Diseases	infection	Infection by Zaire ebolavirus	0.0092	0.0262				HSPA5	1
Skeletal and Muscular Disorders	torticollis	Torticollis	0.0092	0.0262				S1PR3	1
Cell Morphology,Cellular Assembly and Organization,Cellular Development,Cellular Function and Maintenance,Cellular Growth and Proliferation,Nervous System Development and Function,Organismal Development,Tissue Development	neuritogenesis	Neuritogenesis of pheochromocytoma cell lines	0.0092	0.0262				S1PR3	1
Developmental Disorder,Hereditary Disorder,Organismal Injury and Abnormalities,Skeletal and Muscular Disorders	oligodactyly	Oligodactyly	0.0092	0.0262				ZBTB16	1
Tissue Development	growth	Growth of epithelial tissue	0.00938	0.0265				HSPA5,IL6R,ZBTB16	3
Cellular Movement	migration	Migration of cells	0.00939	0.0265		0.978	1.25	BANP,HSPA5,IL6R,S1PR3,ZBTB16	5
Cell Death and Survival	apoptosis	Apoptosis of lung cancer cell lines	0.00953	0.0266				HSPA5,ZBTB16	2
Infectious Diseases	infection	Infection of kidney cell lines	0.00958	0.0266				CHORDC1,HSPA5	2
Cell Death and Survival,Nervous System Development and Function	cell viability	Cell viability of sympathetic neuron	0.00964	0.0266				IL6R	1
Inflammatory Response	acute phase reaction	Acute phase reaction	0.00964	0.0266				IL6R	1
Infectious Diseases,Organismal Injury and Abnormalities	infection	Infection of embryonic cell lines	0.00964	0.0266				CHORDC1,HSPA5	2
Cellular Development	differentiation	Differentiation of stem cells	0.01	0.0276				IL6R,S1PR3	2
Cellular Compromise	permeability transition	Permeability transition of mitochondria	0.0101	0.0276				HSPA5	1
Cellular Growth and Proliferation	cytostasis	Cytostasis	0.0102	0.0277				IL6R,ZBTB16	2
Hematological System Development and Function,Lymphoid Tissue Structure and Development,Tissue Morphology	quantity	Quantity of lymphocytes	0.0102	0.0277				IL6R,S1PR3,SLC6A6	3
Hematological System Development and Function,Lymphoid Tissue Structure and Development,Tissue Morphology	quantity	Quantity of follicular T helper cells	0.0105	0.0278				IL6R	1
Organismal Injury and Abnormalities	pain	Refractory pain	0.0105	0.0278				IL6R	1
Nervous System Development and Function,Tissue Morphology	quantity	Quantity of Schwann cells	0.0105	0.0278				HSPA5	1
Hematological System Development and Function,Hematopoiesis,Tissue Morphology	quantity	Quantity of long-term hematopoietic stem cells	0.0105	0.0278				ZBTB16	1
Cellular Movement	migration	Migration of melanoma cells	0.0105	0.0278				ZBTB16	1
Auditory Disease,Organismal Injury and Abnormalities,Tissue Morphology	degeneration	Degeneration of organ of Corti	0.0105	0.0278				S1PR3	1
Organismal Development	quantity	Quantity of animal	0.0105	0.0278				S1PR3	1
Infectious Diseases	infection	Infection of cells	0.0107	0.0282				CHORDC1,DNAJB1,HSPA5	3
Lipid Metabolism,Small Molecule Biochemistry	synthesis	Synthesis of platelet activating factor	0.0109	0.0284				SLC6A6	1
Cell Death and Survival	apoptosis	Apoptosis of mesothelioma cell lines	0.0109	0.0284				ZBTB16	1
Auditory and Vestibular System Development and Function,Auditory Disease,Neurological Disease,Organ Morphology,Organismal Development,Organismal Injury and Abnormalities	abnormal morphology	Abnormal morphology of vestibule	0.0109	0.0284				S1PR3	1
Inflammatory Disease,Organismal Injury and Abnormalities,Respiratory Disease	bleomycin-induced pulmonary fibrosis	Bleomycin-induced pulmonary fibrosis	0.0109	0.0284				IL6R	1
Cell Death and Survival,Embryonic Development	apoptosis	Apoptosis of embryonic cell lines	0.0111	0.0287				BANP,HSPA5	2
Cellular Development,Cellular Growth and Proliferation,Hematological System Development and Function,Lymphoid Tissue Structure and Development,Nervous System Development and Function	proliferation	Proliferation of microglia	0.0114	0.0288				IL6R	1
Cell Morphology,Organ Morphology,Skeletal and Muscular System Development and Function,Tissue Morphology	diameter	Diameter of skeletal muscle cells	0.0114	0.0288				SLC6A6	1
Post-Translational Modification,Protein Degradation	oxidation	Oxidation of protein	0.0114	0.0288				DNAJB1	1
Immunological Disease,Infectious Diseases,Neurological Disease,Organismal Injury and Abnormalities	tropical spastic paraparesis	Tropical spastic paraparesis	0.0114	0.0288				IL6R	1
Cancer,Gastrointestinal Disease,Hepatic System Disease,Organismal Injury and Abnormalities	hepatitis C virus-related hepatocellular carcinoma	Hepatitis C virus-related hepatocellular carcinoma	0.0114	0.0288				HSPA5	1
Cell Signaling,Small Molecule Biochemistry	synthesis	Synthesis of nitric oxide	0.0115	0.0289				DNAJB1,S1PR3	2
Cancer,Gastrointestinal Disease,Inflammatory Disease,Inflammatory Response,Organismal Injury and Abnormalities	colitis-associated cancer	Colitis-associated cancer	0.0118	0.0292				IL6R	1
Cell-To-Cell Signaling and Interaction,Molecular Transport,Small Molecule Biochemistry	quantity	Quantity of histamine	0.0118	0.0292				IL6R	1
Organismal Injury and Abnormalities	exercise intolerance	Exercise intolerance	0.0118	0.0292				SLC6A6	1
Organismal Development,Skeletal and Muscular Disorders,Skeletal and Muscular System Development and Function	abnormal morphology	Abnormal morphology of forelimb	0.0118	0.0292				ZBTB16	1
Hematological System Development and Function,Hematopoiesis,Tissue Development	accumulation	Accumulation of hematopoietic progenitor cells	0.0118	0.0292				ZBTB16	1
Auditory Disease,Cell Death and Survival,Cellular Compromise,Neurological Disease,Organismal Injury and Abnormalities,Tissue Morphology	neurodegeneration	Neurodegeneration of inner hair cells	0.0122	0.03				S1PR3	1
Cellular Movement,Hematological System Development and Function,Immune Cell Trafficking,Inflammatory Response	migration	Migration of bone marrow-derived dendritic cells	0.0122	0.03				S1PR3	1
Cell-mediated Immune Response,Cellular Movement,Hematological System Development and Function,Immune Cell Trafficking	transendothelial migration	Transendothelial migration of T lymphocytes	0.0122	0.03				S1PR3	1
Post-Translational Modification	aggregation	Aggregation of protein	0.0127	0.0307				DNAJB1	1
Immunological Disease	immunosuppression	Immunosuppression	0.0127	0.0307				SLC6A6	1
Cell Death and Survival,Cell Morphology,Cellular Function and Maintenance	autophagic cell death	Autophagic cell death	0.0127	0.0307				S1PR3	1
Neurological Disease	degeneration	Degeneration of nervous system	0.013	0.0313				IL6R,S1PR3	2
Cellular Movement,Hematological System Development and Function,Immune Cell Trafficking,Inflammatory Response	cellular infiltration	Cellular infiltration by phagocytes	0.013	0.0313				HSPA5,IL6R	2
Cardiovascular System Development and Function,Organismal Development	vasculogenesis	Vasculogenesis	0.0132	0.0316				HSPA5,IL6R,S1PR3	3
Gene Expression	expression	Expression of RNA	0.0132	0.0316		-1.165	-0.995	BANP,DNAJB1,IL6R,RBM3,ZBTB16	5
Immunological Disease,Inflammatory Disease,Inflammatory Response,Organismal Injury and Abnormalities,Respiratory Disease	allergic asthma	Allergic asthma	0.0136	0.0318				IL6R	1
Protein Synthesis	quantity	Quantity of IL-1b in blood	0.0136	0.0318				IL6R	1
Cancer,Skeletal and Muscular Disorders,Tissue Morphology	transformation	Transformation of lumbar vertebra	0.0136	0.0318				ZBTB16	1
Cellular Development,Tissue Development	maturation	Maturation of bone marrow cells	0.0136	0.0318				ZBTB16	1
Cancer,Gastrointestinal Disease,Hepatic System Disease,Organismal Injury and Abnormalities	hepatitis B surface antigen-negative hepatitis C virus negative hepatocellular carcinoma	Hepatitis B surface antigen-negative hepatitis C virus negative hepatocellular carcinoma	0.0136	0.0318				HSPA5	1
Cardiovascular System Development and Function,Ophthalmic Disease,Organismal Development,Organismal Injury and Abnormalities,Visual System Development and Function	corneal neovascularization	Corneal neovascularization	0.014	0.0326				S1PR3	1
Auditory Disease,Neurological Disease,Organismal Injury and Abnormalities	degeneration	Degeneration of spiral ganglion	0.014	0.0326				S1PR3	1
Inflammatory Response	inflammatory response	Inflammatory response	0.0142	0.0329				IL6R,S1PR3,ZBTB16	3
Neurological Disease,Organismal Injury and Abnormalities,Psychological Disorders	striatal degeneration	Striatal degeneration	0.0144	0.0329				IL6R	1
Lipid Metabolism,Molecular Transport,Small Molecule Biochemistry	concentration	Concentration of arachidonic acid	0.0144	0.0329				HSPA5	1
Cell Death and Survival	cell viability	Cell viability of squamous cell carcinoma cell lines	0.0144	0.0329				ACER2	1
Cancer,Endocrine System Disorders,Organismal Injury and Abnormalities,Reproductive System Disease	hyperplasia	Hyperplasia of Leydig cells	0.0144	0.0329				ZBTB16	1
Behavior	swimming behavior	Swimming behavior	0.0144	0.0329				S1PR3	1
Cell Death and Survival	apoptosis	Apoptosis of carcinoma cell lines	0.0148	0.0331				HSPA5,ZBTB16	2
Cell-To-Cell Signaling and Interaction	adhesion	Adhesion of tumor cell lines	0.0148	0.0331				IL6R,ZBTB16	2
Embryonic Development,Organismal Development,Skeletal and Muscular System Development and Function	morphogenesis	Morphogenesis of embryonic hindlimb	0.0149	0.0331				ZBTB16	1
Cell Morphology,Cellular Function and Maintenance	autophagy	Autophagy of breast cancer cell lines	0.0149	0.0331				HSPA5	1
Cardiovascular System Development and Function,Organismal Development,Tissue Morphology	vasodilation	Vasodilation of aorta	0.0149	0.0331				S1PR3	1
Cell Death and Survival,Organismal Injury and Abnormalities	apoptosis	Apoptosis of microvascular endothelial cells	0.0149	0.0331				HSPA5	1
Neurological Disease,Skeletal and Muscular Disorders	paralysis	Paralysis of hindlimb	0.0149	0.0331				HSPA5	1
Cell Death and Survival	apoptosis	Apoptosis of fibroblast cell lines	0.0152	0.0336				BANP,HSPA5	2
Cellular Development,Cellular Growth and Proliferation,Hematological System Development and Function,Hypersensitivity Response,Inflammatory Response,Lymphoid Tissue Structure and Development	proliferation	Proliferation of mast cells	0.0153	0.0336				IL6R	1
Carbohydrate Metabolism,Lipid Metabolism,Small Molecule Biochemistry	synthesis	Synthesis of phosphatidylinositol-3,4,5-triphosphate	0.0153	0.0336				HSPA5	1
Cell Death and Survival	apoptosis	Apoptosis of thyroid tumor cell lines	0.0153	0.0336				HSPA5	1
Cardiovascular Disease,Cardiovascular System Development and Function	abnormal morphology	Abnormal morphology of cardiovascular system	0.0156	0.0343				IL6R,S1PR3,SLC6A6	3
Infectious Diseases	infection	Viral Infection	0.0158	0.0345				CHORDC1,DNAJB1,HSPA5,IL6R	4
Cancer,Hematological Disease,Immunological Disease,Organismal Injury and Abnormalities	acute lymphoblastic leukemia	Acute lymphoblastic leukemia	0.016	0.0347				HSPA5,S1PR3	2
Neurological Disease	neurodegeneration	Neurodegeneration	0.016	0.0348				IL6R,S1PR3	2
Auditory Disease,Cell Death and Survival,Cellular Compromise,Neurological Disease,Organismal Injury and Abnormalities,Tissue Morphology	neurodegeneration	Neurodegeneration of outer hair cells	0.0162	0.0348				S1PR3	1
Cellular Development,Cellular Growth and Proliferation	colony formation	Colony formation of leukemia cell lines	0.0162	0.0348				IL6R	1
Behavior,Reproductive System Development and Function	maternal nurturing	Maternal nurturing	0.0166	0.0356				S1PR3	1
Cellular Development,Cellular Growth and Proliferation	proliferation	Proliferation of prostate cancer cell lines	0.0166	0.0356				HSPA5,ZBTB16	2
Tissue Development	accumulation	Accumulation of cells	0.0167	0.0357				IL6R,ZBTB16	2
Endocrine System Disorders,Organismal Injury and Abnormalities	benign thyroid nodule	Benign thyroid nodule	0.017	0.036				HSPA5	1
Cancer,Skeletal and Muscular Disorders,Tissue Morphology	transformation	Transformation of thoracic vertebra	0.017	0.036				ZBTB16	1
Inflammatory Disease,Inflammatory Response,Organismal Injury and Abnormalities,Respiratory Disease	inflammation	Inflammation of lung	0.0171	0.036				HSPA5,IL6R	2
Infectious Diseases	infection	Infection by RNA virus	0.0171	0.036				CHORDC1,DNAJB1,HSPA5	3
Digestive System Development and Function,Gastrointestinal Disease,Hepatic System Development and Function,Hepatic System Disease,Inflammatory Disease,Inflammatory Response,Organ Development,Organismal Injury and Abnormalities	inflammation	Inflammation of liver	0.0173	0.0364				HSPA5,IL6R	2
Cellular Development,Cellular Growth and Proliferation	colony formation	Colony formation of tumor cell lines	0.0174	0.0364				IL6R,ZBTB16	2
Cardiovascular Disease,Cardiovascular System Development and Function,Cell Morphology,Organismal Development,Organismal Injury and Abnormalities,Tissue Morphology	abnormal morphology	Abnormal morphology of vascular endothelial cells	0.0175	0.0364				S1PR3	1
Protein Synthesis	translation	Translation of protein	0.018	0.0375				HSPA5,RBM3	2
Gastrointestinal Disease,Immunological Disease,Ophthalmic Disease,Organismal Injury and Abnormalities	primary Sjï¿½gren syndrome	Primary SjÃ¶gren syndrome	0.0183	0.0379				IL6R	1
Organismal Development,Skeletal and Muscular Disorders,Skeletal and Muscular System Development and Function	abnormal morphology	Abnormal morphology of hindlimb	0.0183	0.0379				ZBTB16	1
Cellular Development,Cellular Growth and Proliferation,Connective Tissue Development and Function,Tissue Development	cell proliferation	Cell proliferation of fibroblasts	0.0185	0.0381				IL6R,RBM3	2
Cellular Compromise	degeneration	Degeneration of cells	0.0185	0.0381				S1PR3,SLC6A6	2
Cellular Movement	migration	Migration of tumor cell lines	0.0186	0.0382				BANP,IL6R,S1PR3	3
Protein Synthesis	quantity	Quantity of aspartate transaminase in blood	0.0188	0.0383				IL6R	1
Reproductive System Development and Function	fertility	Fertility	0.0189	0.0383				S1PR3,SLC6A6	2
Cellular Movement,Hematological Disease,Immunological Disease,Inflammatory Disease,Inflammatory Response,Organismal Injury and Abnormalities,Respiratory Disease	allergic pulmonary eosinophilia	Allergic pulmonary eosinophilia	0.0192	0.0383				HSPA5	1
Cardiovascular Disease,Cell Death and Survival,Connective Tissue Disorders,Hematological Disease,Organismal Injury and Abnormalities	paroxysmal nocturnal hemoglobinuria	Paroxysmal nocturnal hemoglobinuria	0.0192	0.0383				HSPA5	1
Cell-To-Cell Signaling and Interaction	adhesion	Adhesion of melanoma cell lines	0.0192	0.0383				IL6R	1
Cell-To-Cell Signaling and Interaction,Nervous System Development and Function	response	Response of neurons	0.0192	0.0383				IL6R	1
Digestive System Development and Function	ingestion	Ingestion by rats	0.0192	0.0383				IL6R	1
Cardiovascular System Development and Function,Cell Morphology,Cellular Development,Organismal Development,Tissue Development	sprouting	Sprouting of vascular endothelial cells	0.0192	0.0383				S1PR3	1
Cell Death and Survival,Cellular Development,Cellular Function and Maintenance,Hematopoiesis	self-renewal	Self-renewal of hematopoietic cells	0.0192	0.0383				ZBTB16	1
Cellular Movement,Hematological System Development and Function,Immune Cell Trafficking,Inflammatory Response	chemotaxis	Chemotaxis of leukocytes	0.0195	0.0387				IL6R,S1PR3	2
Carbohydrate Metabolism,Cellular Function and Maintenance	glycolysis	Glycolysis of tumor cell lines	0.0196	0.0387				DNAJB1	1
Cellular Assembly and Organization,Tissue Development	formation	Formation of fibrils	0.0196	0.0387				HSPA5	1
Hematological System Development and Function,Lymphoid Tissue Structure and Development,Organ Morphology,Organismal Development,Tissue Morphology	size	Size of spleen	0.0196	0.0387				ZBTB16	1
Organismal Development	abnormal morphology	Abnormal morphology of bent tail	0.0201	0.0394				ZBTB16	1
Embryonic Development,Organismal Development,Skeletal and Muscular System Development and Function	morphogenesis	Morphogenesis of forelimb	0.0205	0.0395				ZBTB16	1
Cancer,Gastrointestinal Disease,Hepatic System Disease,Organismal Injury and Abnormalities	hepatitis B virus-related hepatocellular carcinoma	Hepatitis B virus-related hepatocellular carcinoma	0.0205	0.0395				HSPA5	1
Cellular Development,Cellular Growth and Proliferation,Connective Tissue Development and Function,Hematological System Development and Function,Hematopoiesis,Organismal Development,Tissue Development	thrombopoiesis	Thrombopoiesis	0.0205	0.0395				IL6R	1
Endocrine System Disorders,Organ Morphology,Organismal Injury and Abnormalities,Reproductive System Disease	atrophy	Atrophy of testis	0.0205	0.0395				ZBTB16	1
Cell Death and Survival	apoptosis	Apoptosis of synovial cells	0.0205	0.0395				HSPA5	1
Cell Death and Survival	apoptosis	Apoptosis of splenocytes	0.0205	0.0395				IL6R	1
Organismal Development	morphology	Morphology of body cavity	0.0208	0.0399				IL6R,S1PR3,SLC6A6,ZBTB16	4
Cellular Development,Cellular Growth and Proliferation,Organ Development,Skeletal and Muscular System Development and Function,Tissue Development	development	Development of muscle cell lines	0.0209	0.0399				S1PR3	1
Cell Death and Survival	cell viability	Cell viability of hepatoma cell lines	0.0209	0.0399				HSPA5	1
Digestive System Development and Function,Embryonic Development,Endocrine System Development and Function,Organ Development,Organismal Development,Tissue Development	development	Development of endocrine region of pancreas	0.0209	0.0399				IL6R	1
Cancer,Organismal Injury and Abnormalities	growth	Growth of tumor	0.0211	0.0401				HSPA5,IL6R,S1PR3	3
Cellular Development,Embryonic Development,Organismal Development	differentiation	Differentiation of neuronal progenitor cells	0.0213	0.0404				S1PR3	1
Connective Tissue Disorders,Inflammatory Disease,Inflammatory Response,Organismal Injury and Abnormalities,Skeletal and Muscular Disorders	ankylosing spondylitis	Ankylosing spondylitis	0.0213	0.0404				IL6R	1
Cellular Development,Cellular Growth and Proliferation,Organ Development,Skeletal and Muscular System Development and Function,Tissue Development	proliferation	Proliferation of muscle cells	0.0214	0.0404				IL6R,S1PR3	2
Organismal Injury and Abnormalities,Reproductive System Disease	endometriosis	Endometriosis	0.0215	0.0404				SLC6A6,ZBTB16	2
Inflammatory Response	cytotoxic T lymphocyte response	Cytotoxic T lymphocyte response	0.0218	0.0407				SLC6A6	1
Carbohydrate Metabolism,Molecular Transport	quantity	Quantity of lactic acid	0.0218	0.0407				ZBTB16	1
Cellular Movement,Hematological System Development and Function,Immune Cell Trafficking	cell movement	Cell movement of antigen presenting cells	0.0222	0.0413				HSPA5,S1PR3	2
DNA Replication, Recombination, and Repair,Energy Production,Nucleic Acid Metabolism,Small Molecule Biochemistry	hydrolysis	Hydrolysis of ATP	0.0222	0.0413				HSPA5	1
Cellular Development,Cellular Growth and Proliferation,Hematological System Development and Function,Hematopoiesis,Tissue Development	differentiation	Differentiation of hematopoietic progenitor cells	0.0223	0.0413				IL6R,ZBTB16	2
Cell Signaling,Molecular Transport,Vitamin and Mineral Metabolism	accumulation	Accumulation of Ca2+	0.0226	0.0419				S1PR3	1
Cancer,Gastrointestinal Disease,Organismal Injury and Abnormalities,Tumor Morphology	invasion	Invasion of digestive organ tumor	0.0231	0.0422				HSPA5	1
Endocrine System Disorders,Gastrointestinal Disease,Inflammatory Disease,Inflammatory Response,Organismal Injury and Abnormalities	chronic pancreatitis	Chronic pancreatitis	0.0231	0.0422				HSPA5	1
Cellular Movement,Reproductive System Development and Function	migration	Migration of gonadal cell lines	0.0231	0.0422				S1PR3	1
Hereditary Disorder,Ophthalmic Disease,Organismal Injury and Abnormalities	primary open-angle glaucoma	Primary open-angle glaucoma	0.0231	0.0422				IL6R	1
Cell Signaling,Molecular Transport,Vitamin and Mineral Metabolism	quantity	Quantity of Ca2+	0.0233	0.0425				HSPA5,S1PR3	2
Cardiovascular System Development and Function,Cell Morphology,Cellular Development,Organismal Development,Tissue Development	tubulation	Tubulation of endothelial cell lines	0.0235	0.0428				S1PR3	1
Cellular Assembly and Organization,DNA Replication, Recombination, and Repair	amplification	Amplification of centrosome	0.0239	0.0434				CHORDC1	1
Cancer,Organismal Injury and Abnormalities	lymphoreticular neoplasm	Lymphoreticular neoplasm	0.024	0.0435				ACER2,CHORDC1,HSPA5,IL6R,S1PR3	5
Cell Cycle,Cellular Assembly and Organization,Cellular Function and Maintenance,DNA Replication, Recombination, and Repair	duplication	Duplication of centrosome	0.0244	0.044				CHORDC1	1
Infectious Diseases	release	Release of virus	0.0248	0.0446				HSPA5	1
Cell-To-Cell Signaling and Interaction,Connective Tissue Development and Function,Hepatic System Development and Function	activation	Activation of hepatic stellate cells	0.0252	0.0452				IL6R	1
Cellular Movement,Hematological System Development and Function,Immune Cell Trafficking,Inflammatory Response	influx	Influx of neutrophils	0.0252	0.0452				IL6R	1
Cell Death and Survival	activation-induced cell death	Activation-induced cell death of T lymphocytes	0.0257	0.0457				SLC6A6	1
Cardiovascular System Development and Function,Cellular Development,Cellular Growth and Proliferation,Connective Tissue Development and Function,Digestive System Development and Function,Hepatic System Development and Function,Organ Development,Organismal Development,Tissue Development	proliferation	Proliferation of hepatic stellate cells	0.0257	0.0457				IL6R	1
Cell Signaling,Small Molecule Biochemistry	quantity	Quantity of nitric oxide	0.0265	0.0468				DNAJB1	1
Cellular Movement	migration	Migration of bone cancer cell lines	0.0265	0.0468				IL6R	1
Cell Death and Survival	apoptosis	Apoptosis of fibrosarcoma cell lines	0.0265	0.0468				HSPA5	1
Cellular Development,Cellular Growth and Proliferation	cell proliferation	Cell proliferation of tumor cell lines	0.0266	0.0468		-0.379	-0.187	HSPA5,IL6R,S1PR3,ZBTB16	4
Cell Morphology,Cellular Function and Maintenance	autophagy	Autophagy of cells	0.0269	0.047				ACER2,HSPA5	2
Cellular Development	epithelial-mesenchymal transition	Epithelial-mesenchymal transition of breast cancer cell lines	0.0269	0.047				BANP	1
Connective Tissue Development and Function,Tissue Morphology	quantity	Quantity of brown adipose tissue	0.0269	0.047				HSPA5	1
Organ Morphology,Skeletal and Muscular System Development and Function	quantity	Quantity of rib	0.0269	0.047				ZBTB16	1
Endocrine System Disorders,Gastrointestinal Disease,Metabolic Disease,Organismal Injury and Abnormalities	non-insulin-dependent diabetes mellitus	Non-insulin-dependent diabetes mellitus	0.027	0.047				HSPA5,ZBTB16	2
Cell Signaling	activation	Activation of enzyme	0.0274	0.047				ACER2,S1PR3	2
Cellular Development,Cellular Growth and Proliferation	expansion	Expansion of myeloid cells	0.0274	0.047				IL6R	1
Cell Signaling,Vitamin and Mineral Metabolism	signaling	Signaling of Ca2+	0.0274	0.047				HSPA5	1
Inflammatory Response	fever	Fever	0.0274	0.047				IL6R	1
Immunological Disease,Inflammatory Response	inflammatory response	Abnormal inflammatory response	0.0274	0.047				IL6R	1
Organ Morphology,Organismal Development,Reproductive System Development and Function,Tissue Morphology	quantity	Quantity of sperm	0.0278	0.0476				IL6R	1
Nervous System Development and Function	righting reflex	Righting reflex	0.0282	0.0482				S1PR3	1
Cellular Development,Nervous System Development and Function,Tissue Development	differentiation	Differentiation of neurons	0.0284	0.0483				IL6R,S1PR3	2
Connective Tissue Development and Function,Connective Tissue Disorders,Organ Morphology,Organismal Development,Organismal Injury and Abnormalities,Skeletal and Muscular Disorders,Skeletal and Muscular System Development and Function,Tissue Development	abnormal morphology	Abnormal morphology of tibia	0.0287	0.0486				ZBTB16	1
Cardiovascular Disease,Cardiovascular System Development and Function,Organ Morphology,Organismal Development,Organismal Injury and Abnormalities	abnormal morphology	Abnormal morphology of thin ventricular wall	0.0287	0.0486				SLC6A6	1
Cellular Development,Embryonic Development,Organismal Development,Tissue Development	differentiation	Differentiation of neural stem cells	0.0291	0.0492				S1PR3	1
Cellular Development,Cellular Growth and Proliferation,Embryonic Development,Organismal Development,Tissue Development	proliferation	Proliferation of neural stem cells	0.0295	0.0498				S1PR3	1
Cellular Movement	invasion	Invasion of cells	0.0297	0.05				HSPA5,S1PR3,ZBTB16	3
Endocrine System Disorders,Organismal Injury and Abnormalities,Reproductive System Disease	degeneration	Degeneration of seminiferous tubule	0.0304	0.0507				ZBTB16	1
Cellular Growth and Proliferation	colonization	Colonization	0.0304	0.0507				S1PR3	1
Cancer,Cellular Development,Cellular Growth and Proliferation,Organismal Injury and Abnormalities,Tumor Morphology	proliferation	Proliferation of tumor cells	0.0304	0.0507				HSPA5,IL6R	2
Cancer,Organismal Injury and Abnormalities	development	Development of melanoma	0.0308	0.0513				SLC6A6	1
Organismal Injury and Abnormalities,Reproductive System Disease	spontaneous abortion	Spontaneous abortion	0.0312	0.0517				S1PR3	1
Cellular Compromise,Lipid Metabolism,Small Molecule Biochemistry	peroxidation	Peroxidation of lipid	0.0312	0.0517				HSPA5	1
Cancer,Hematological Disease,Immunological Disease,Organismal Injury and Abnormalities	mature T-cell neoplasm	Mature T-cell neoplasm	0.0313	0.0517				IL6R,S1PR3	2
Cellular Development,Nervous System Development and Function	differentiation	Differentiation of astrocytes	0.0317	0.0521				S1PR3	1
Cardiovascular Disease,Cardiovascular System Development and Function,Organ Morphology,Organismal Development,Organismal Injury and Abnormalities,Skeletal and Muscular Disorders	left ventricular dilation	Left ventricular dilation	0.0317	0.0521				SLC6A6	1
Cell Signaling,Nucleic Acid Metabolism,Small Molecule Biochemistry	binding	Binding of guanosine 5'-O-(3-thiotriphosphate)	0.0321	0.0524				S1PR3	1
Cell Cycle	cell cycle progression	Abnormal cell cycle	0.0321	0.0524				RBM3	1
Embryonic Development,Organismal Development,Skeletal and Muscular System Development and Function	morphogenesis	Morphogenesis of embryonic digit	0.0321	0.0524				ZBTB16	1
Cardiovascular System Development and Function,Cell-To-Cell Signaling and Interaction	activation	Activation of endothelial cells	0.0325	0.0528				IL6R	1
Cancer,Hematological Disease,Immunological Disease,Organismal Injury and Abnormalities	T-cell non-Hodgkin disease	T-cell non-Hodgkin lymphoma	0.0325	0.0528				IL6R,S1PR3	2
Cancer,Neurological Disease,Organismal Injury and Abnormalities	glioma formation	Glioma	0.0332	0.0538				BANP,DNAJB1,HSPA5	3
Cardiovascular System Development and Function,Cell Morphology,Embryonic Development,Organ Development,Organ Morphology,Organismal Development,Skeletal and Muscular System Development and Function,Tissue Development,Tissue Morphology	size	Size of cardiomyocytes	0.0334	0.0539				IL6R	1
Cancer,Neurological Disease,Organismal Injury and Abnormalities	ependymoma	Ependymoma	0.0338	0.0544				BANP	1
Gastrointestinal Disease,Inflammatory Disease,Inflammatory Response,Organismal Injury and Abnormalities	dextran sodium sulfate-induced colitis	Dextran sodium sulfate-induced colitis	0.0338	0.0544				IL6R	1
Cancer,Gastrointestinal Disease,Hepatic System Disease,Organismal Injury and Abnormalities	liver carcinoma	Liver carcinoma	0.0341	0.0548				BANP,CHORDC1,HSPA5,IL6R,SLC6A6,ZBTB16	6
Digestive System Development and Function,Gastrointestinal Disease,Hepatic System Development and Function,Hepatic System Disease,Infectious Diseases,Inflammatory Disease,Inflammatory Response,Organ Development,Organismal Injury and Abnormalities	chronic hepatitis C	Chronic hepatitis C	0.0342	0.0548				HSPA5	1
Cell Death and Survival,Cell Signaling	activation	Activation of caspase	0.0351	0.056				ACER2	1
Cellular Development,Cellular Growth and Proliferation,Embryonic Development,Organismal Development	proliferation	Proliferation of neuronal progenitor cells	0.0355	0.0564				S1PR3	1
Protein Synthesis	quantity	Quantity of TNF in blood	0.0355	0.0564				IL6R	1
Organismal Functions	grasping	Grasping	0.0359	0.0568				S1PR3	1
Cancer,Organismal Injury and Abnormalities,Tumor Morphology	invasion	Invasion of carcinoma	0.0359	0.0568				HSPA5	1
Hematological System Development and Function,Lymphoid Tissue Structure and Development,Organ Morphology,Tissue Morphology	morphology	Morphology of lymphoid organ	0.0362	0.0572				S1PR3,ZBTB16	2
Dermatological Diseases and Conditions,Organismal Injury and Abnormalities	edema	Edema of skin	0.0363	0.0572				S1PR3	1
Cellular Movement,Hematological System Development and Function,Immune Cell Trafficking	cell movement	Cell movement of mononuclear leukocytes	0.0367	0.0577				IL6R,S1PR3	2
Cellular Development,Cellular Growth and Proliferation	proliferation	Proliferation of myeloma cell lines	0.0376	0.059				IL6R	1
Cell Death and Survival,Organismal Injury and Abnormalities	cell death	Cell death of epithelial cells	0.0385	0.0601				HSPA5,IL6R	2
Cellular Growth and Proliferation,Tissue Development	proliferation	Proliferation of epithelial cells	0.0388	0.0605				IL6R,ZBTB16	2
Cellular Movement,Reproductive System Development and Function	migration	Migration of breast cell lines	0.0389	0.0605				BANP	1
Protein Synthesis	metabolism	Metabolism of protein	0.0401	0.0621				BANP,HSPA5,RBM3	3
Cellular Compromise,Hematological Disease,Immunological Disease,Organismal Injury and Abnormalities	function	Abnormal function of B lymphocytes	0.0402	0.0621				S1PR3	1
Developmental Disorder,Skeletal and Muscular Disorders	polydactyly	Polydactyly	0.0402	0.0621				ZBTB16	1
Behavior	posture	Abnormal posture	0.041	0.0631				S1PR3	1
Cellular Compromise,Ophthalmic Disease,Organismal Injury and Abnormalities,Tissue Morphology	degeneration	Degeneration of photoreceptors	0.041	0.0631				SLC6A6	1
Cardiovascular Disease,Cardiovascular System Development and Function,Cell Morphology,Organ Morphology,Organismal Development,Organismal Injury and Abnormalities,Skeletal and Muscular Disorders,Skeletal and Muscular System Development and Function,Tissue Morphology	abnormal morphology	Abnormal morphology of cardiomyocytes	0.0414	0.0634				SLC6A6	1
Embryonic Development,Organismal Development	patterning	Patterning of embryo	0.0414	0.0634				ZBTB16	1
Carbohydrate Metabolism	synthesis	Synthesis of carbohydrate	0.0418	0.0639				HSPA5,S1PR3	2
Connective Tissue Development and Function,Tissue Morphology	quantity	Quantity of white adipose tissue	0.0427	0.0651				HSPA5	1
Cardiovascular Disease	function	Abnormal function of cardiovascular system	0.0436	0.0661				SLC6A6	1
Connective Tissue Disorders,Immunological Disease,Inflammatory Disease,Inflammatory Response,Organismal Injury and Abnormalities,Skeletal and Muscular Disorders	rheumatoid arthritis	Early stage rheumatoid arthritis	0.0436	0.0661				IL6R	1
Cell-mediated Immune Response,Cellular Development,Cellular Function and Maintenance,Cellular Growth and Proliferation,Embryonic Development,Hematological System Development and Function,Hematopoiesis,Lymphoid Tissue Structure and Development,Organ Development,Organismal Development,Tissue Development	differentiation	Differentiation of CD4+ T-lymphocytes	0.044	0.0666				DNAJB1	1
Drug Metabolism,Endocrine System Development and Function,Lipid Metabolism,Molecular Transport,Small Molecule Biochemistry	concentration	Concentration of testosterone	0.0444	0.0669				ZBTB16	1
Cancer,Organismal Injury and Abnormalities	cancer	Cancer of cells	0.0444	0.0669				BANP,HSPA5,IL6R,S1PR3,SLC6A6,ZBTB16	6
Immunological Disease,Neurological Disease,Skeletal and Muscular Disorders	myasthenia gravis	Myasthenia gravis	0.0448	0.0672				IL6R	1
Drug Metabolism,Molecular Transport,Small Molecule Biochemistry	concentration	Concentration of glutathione	0.0448	0.0672				HSPA5	1
Cell Death and Survival,Neurological Disease,Organismal Injury and Abnormalities	apoptosis	Apoptosis of cortical neurons	0.0452	0.0674				HSPA5	1
Behavior	vertical rearing	Vertical rearing	0.0452	0.0674				S1PR3	1
Carbohydrate Metabolism,Small Molecule Biochemistry	synthesis	Synthesis of inositol phosphate	0.0452	0.0674				S1PR3	1
Hematological System Development and Function,Lymphoid Tissue Structure and Development,Tissue Morphology	quantity	Quantity of T lymphocytes	0.0455	0.0677				IL6R,SLC6A6	2
Organismal Injury and Abnormalities	injury	Injury of mice	0.0461	0.0682				ZBTB16	1
Organ Development,Organ Morphology,Skeletal and Muscular System Development and Function	mass	Mass of skeletal muscle	0.0461	0.0682				SLC6A6	1
Hematological System Development and Function,Humoral Immune Response,Lymphoid Tissue Structure and Development,Tissue Morphology	quantity	Quantity of marginal-zone B lymphocytes	0.0465	0.0686				S1PR3	1
Cardiovascular System Development and Function,Embryonic Development,Organ Development,Organismal Development,Tissue Development	cardiogenesis	Cardiogenesis	0.0466	0.0686				IL6R,S1PR3	2
Cell-To-Cell Signaling and Interaction,Cellular Assembly and Organization,Tissue Development	adhesion	Adhesion of cell-associated matrix	0.0473	0.0696				ACER2	1
Nutritional Disease	obesity	Obesity	0.0477	0.0699				HSPA5,IL6R	2
Cellular Movement	migration	Migration of sarcoma cell lines	0.0478	0.0699				IL6R	1
Nutritional Disease	body mass index	Body mass index	0.0482	0.0704				IL6R	1
Cellular Development	maturation	Maturation of myeloid cells	0.0486	0.0708				ZBTB16	1
Cell Death and Survival	cell viability	Cell viability of leukemia cell lines	0.049	0.0711				HSPA5	1
Organismal Injury and Abnormalities,Reproductive System Disease	asthenozoospermia	Asthenozoospermia	0.049	0.0711				ZBTB16	1
Cell-To-Cell Signaling and Interaction	adhesion	Adhesion of leukemia cell lines	0.0495	0.0715				ZBTB16	1
Cardiovascular Disease,Cardiovascular System Development and Function,Organ Morphology,Organismal Development,Organismal Injury and Abnormalities	enlargement	Enlargement of heart	0.0495	0.0715				IL6R,SLC6A6	2

## Sheet: Liver
# Ingenuity Pathway Analysis - Diseases and Functions - LIVER
#
Categories	Function	Diseases or Functions Annotation	p-value	B-H p-value	Predicted Activation State	Activation z-score	Bias-corrected z-score	Molecules	# Molecules
Cancer,Organismal Injury and Abnormalities	abdominal carcinoma	Abdominal carcinoma	1.03e-09	3.13e-06		0.293	0.306	ABCB9,ABHD15,ABL1,ACSM5,ADAM11,ADAMTS7,ADIPOR2,AFAP1L1,AGO2,ALAS2,ALG12,ALS2,AMACR,ANGPTL2,ANGPTL4,ANKRD13C,ANKRD33B,ANKS4B,AOX1,AQP9,ARNTL,ATP1B1,ATP2A2,AVPR1A,BACE1,BAG3,BANP,BCAR3,BLM,BNIP3,C1orf50,C1S,C6,CA14,CAMK2G,CAMSAP2,CAPRIN1,CASP8AP2,CBS/CBSL,CC2D2A,CCS,CDC42EP1,CDH17,CDKN1A,CFLAR,CHORDC1,CITED2,CNTROB,COL4A1,CPT1B,CRAT,CRY2,CYP4F8,CYP8B1,DMXL2,DNAJB4,DNAJB5,DNAJB9,DOT1L,DYRK1B,EEPD1,E…	253
Cancer,Endocrine System Disorders,Organismal Injury and Abnormalities	thyroid gland tumor	Thyroid gland tumor	1.25e-09	3.13e-06				ABCB9,ABHD15,ABL1,ACSM5,ADAM11,ADAMTS7,ADIPOR2,AFAP1L1,ALAS2,ALG12,ALG2,ALS2,ANGPTL2,ANGPTL4,ANKRD13C,ANKRD33B,ANKS4B,AOX1,ARL8B,ARNTL,ATP1B1,ATP2A2,BACE1,BANP,BCAR3,BLM,BNIP3,C1orf50,C1S,C6,CA14,CAMK2G,CAMSAP2,CAPRIN1,CASP8AP2,CBS/CBSL,CC2D2A,CCS,CDC42EP1,CDH17,CDKN1A,CFLAR,CHORDC1,CITED2,CNN3,CNTROB,COL4A1,CPT1B,CRAT,CYP4F8,DBP,DMXL2,DNAJB1,DNAJB4,DNAJB5,DNAJB9,DOT1L,DYRK1B,EFTUD2,EIF1AX,EIF2AK…	221
Cancer,Endocrine System Disorders,Organismal Injury and Abnormalities	epithelial thyroid cancer	Thyroid carcinoma	1.68e-09	3.13e-06				ABCB9,ABHD15,ABL1,ACSM5,ADAM11,ADAMTS7,ADIPOR2,AFAP1L1,ALAS2,ALG12,ALG2,ALS2,ANGPTL2,ANGPTL4,ANKRD13C,ANKRD33B,ANKS4B,AOX1,ARL8B,ARNTL,ATP1B1,ATP2A2,BACE1,BANP,BCAR3,BLM,BNIP3,C1orf50,C1S,C6,CA14,CAMK2G,CAMSAP2,CAPRIN1,CASP8AP2,CBS/CBSL,CC2D2A,CCS,CDC42EP1,CDH17,CDKN1A,CFLAR,CHORDC1,CITED2,CNN3,CNTROB,COL4A1,CPT1B,CRAT,CYP4F8,DBP,DMXL2,DNAJB1,DNAJB4,DNAJB5,DNAJB9,DOT1L,DYRK1B,EFTUD2,EIF1AX,EIF2AK…	220
Cancer,Organismal Injury and Abnormalities	abdominal adenocarcinoma	Abdominal adenocarcinoma	1.78e-09	3.13e-06				ABCB9,ABHD15,ABL1,ACSM5,ADAM11,ADAMTS7,ADIPOR2,AFAP1L1,ALAS2,ALG12,ALS2,AMACR,ANGPTL2,ANGPTL4,ANKRD13C,ANKRD33B,ANKS4B,AOX1,AQP9,ARNTL,ATP1B1,ATP2A2,AVPR1A,BACE1,BAG3,BANP,BCAR3,BLM,BNIP3,C1orf50,C1S,C6,CA14,CAMSAP2,CAPRIN1,CASP8AP2,CBS/CBSL,CC2D2A,CCS,CDC42EP1,CDH17,CDKN1A,CFLAR,CHORDC1,CITED2,CNTROB,COL4A1,CPT1B,CRAT,CRY2,CYP4F8,CYP8B1,DMXL2,DNAJB4,DNAJB5,DNAJB9,DOT1L,DYRK1B,EEPD1,EFTUD2,EHD3,E…	241
Cancer,Organismal Injury and Abnormalities	neck neoplasm	Neck neoplasm	2.06e-09	3.13e-06				ABCB9,ABHD15,ABL1,ACSM5,ADAM11,ADAMTS7,ADIPOR2,AFAP1L1,ALAS2,ALG12,ALG2,ALS2,ANGPTL2,ANGPTL4,ANKRD13C,ANKRD33B,ANKS4B,AOX1,ARL8B,ARNTL,ATP1B1,ATP2A2,BACE1,BANP,BCAR3,BLM,BNIP3,C1orf50,C1S,C6,CA14,CAMK2G,CAMSAP2,CAPRIN1,CASP8AP2,CBS/CBSL,CC2D2A,CCS,CDC42EP1,CDH17,CDKN1A,CFLAR,CHORDC1,CITED2,CNN3,CNTROB,COL4A1,CPT1B,CRAT,CYP4F8,DBP,DMXL2,DNAJB1,DNAJB4,DNAJB5,DNAJB9,DOT1L,DYRK1B,EFTUD2,EIF1AX,EIF2AK…	222
Cancer,Organismal Injury and Abnormalities	cancer	Cancer of secretory structure	2.25e-09	3.13e-06				ABCB9,ABHD15,ABL1,ACSM5,ADAM11,ADAMTS7,ADIPOR2,AFAP1L1,AGO2,ALAS2,ALG12,ALG2,ALS2,AMACR,ANGPTL2,ANGPTL4,ANKRD13C,ANKRD33B,ANKS4B,AOX1,ARL8B,ARNTL,ATP1B1,ATP2A2,BACE1,BANP,BCAR3,BLM,BNIP3,C1orf50,C1S,C6,CA14,CAMK2G,CAMSAP2,CAPRIN1,CASP8AP2,CBS/CBSL,CC2D2A,CCS,CDC42EP1,CDH17,CDKN1A,CFLAR,CHORDC1,CITED2,CNN3,CNTROB,COL4A1,CPT1B,CRAT,CRY2,CYP4F8,DBP,DMXL2,DNAJB1,DNAJB4,DNAJB5,DNAJB9,DOT1L,DYRK1B,EFTU…	238
Cancer,Organismal Injury and Abnormalities	head and neck neoplasia	Head and neck tumor	2.76e-09	3.17e-06				ABCB9,ABHD15,ABL1,ACSM5,ADAM11,ADAMTS7,ADIPOR2,AFAP1L1,ALAS2,ALG12,ALG2,ALS2,ANGPTL2,ANGPTL4,ANKRD13C,ANKRD33B,ANKS4B,AOX1,ARL8B,ARNTL,ATP1B1,ATP2A2,AVPR1A,BACE1,BAG3,BANP,BCAR3,BLM,BMF,BNIP3,C1orf50,C1S,C6,CA14,CAMK2G,CAMSAP2,CAPRIN1,CASP8AP2,CBS/CBSL,CC2D2A,CCS,CDC42EP1,CDH17,CDKN1A,CFLAR,CHORDC1,CITED2,CNN3,CNTROB,COL4A1,CPT1B,CRAT,CYP4F8,DBP,DMXL2,DNAJB1,DNAJB4,DNAJB5,DNAJB9,DOT1L,DYRK1B,EFTU…	231
Cancer,Organismal Injury and Abnormalities	head and neck carcinoma	Head and neck carcinoma	3.03e-09	3.17e-06				ABCB9,ABHD15,ABL1,ACSM5,ADAM11,ADAMTS7,ADIPOR2,AFAP1L1,ALAS2,ALG12,ALG2,ALS2,ANGPTL2,ANGPTL4,ANKRD13C,ANKRD33B,ANKS4B,AOX1,ARL8B,ARNTL,ATP1B1,ATP2A2,AVPR1A,BACE1,BANP,BCAR3,BLM,BNIP3,C1orf50,C1S,C6,CA14,CAMK2G,CAMSAP2,CAPRIN1,CASP8AP2,CBS/CBSL,CC2D2A,CCS,CDC42EP1,CDH17,CDKN1A,CFLAR,CHORDC1,CITED2,CNN3,CNTROB,COL4A1,CPT1B,CRAT,CYP4F8,DBP,DMXL2,DNAJB1,DNAJB4,DNAJB5,DNAJB9,DOT1L,DYRK1B,EFTUD2,EIF1AX…	228
Cancer,Endocrine System Disorders,Organismal Injury and Abnormalities	endocrine gland tumor	Endocrine gland tumor	3.48e-09	3.23e-06				ABCB9,ABHD15,ABL1,ACSM5,ADAM11,ADAMTS7,ADIPOR2,AFAP1L1,ALAS2,ALG12,ALG2,ALS2,ANGPTL2,ANGPTL4,ANKRD13C,ANKRD33B,ANKS4B,AOX1,ARL8B,ARNTL,ATP1B1,ATP2A2,BACE1,BANP,BCAR3,BLM,BNIP3,C1orf50,C1S,C6,CA14,CAMK2G,CAMSAP2,CAPRIN1,CASP8AP2,CBS/CBSL,CC2D2A,CCS,CDC42EP1,CDH17,CDKN1A,CFLAR,CHORDC1,CITED2,CNN3,CNTROB,COL4A1,CPT1B,CRAT,CYP4F8,DBP,DMXL2,DNAJB1,DNAJB4,DNAJB5,DNAJB9,DOT1L,DYRK1B,EFTUD2,EIF1AX,EIF2AK…	222
Cancer,Organismal Injury and Abnormalities	nonhematologic malignant neoplasm	Nonhematologic malignant neoplasm	7e-09	5.85e-06		0.511	0.514	ABCB9,ABHD15,ABL1,ACSM5,ADAM11,ADAMTS7,ADIPOR2,AFAP1L1,AGO2,ALAS2,ALG12,ALG2,ALS2,AMACR,ANGPTL2,ANGPTL4,ANKRD13C,ANKRD33B,ANKRD46,ANKS4B,AOX1,AQP9,ARL8B,ARNTL,ATP1B1,ATP2A2,AVPR1A,BACE1,BAG3,BANP,BCAR3,BLM,BMF,BNIP3,C1orf50,C1S,C4orf46,C6,CA14,CALCOCO1,CAMK2G,CAMSAP2,CAPRIN1,CASP8AP2,CBS/CBSL,CC2D2A,CCS,CDC42EP1,CDH17,CDKN1A,CFLAR,CHORDC1,CITED2,CNN3,CNTROB,COL4A1,CPT1B,CRAT,CRY2,CYP4F8,CYP8B1,DB…	272
Cancer,Organismal Injury and Abnormalities	adenocarcinoma	Adenocarcinoma	9.6e-09	7.29e-06				ABCB9,ABHD15,ABL1,ACSM5,ADAM11,ADAMTS7,ADIPOR2,AFAP1L1,AGO2,ALAS2,ALG12,ALS2,AMACR,ANGPTL2,ANGPTL4,ANKRD13C,ANKRD33B,ANKS4B,AOX1,AQP9,ARNTL,ATP1B1,ATP2A2,AVPR1A,BACE1,BAG3,BANP,BCAR3,BLM,BNIP3,C1orf50,C1S,C6,CA14,CAMSAP2,CAPRIN1,CASP8AP2,CBS/CBSL,CC2D2A,CCS,CDC42EP1,CDH17,CDKN1A,CFLAR,CHORDC1,CITED2,CNTROB,COL4A1,CPT1B,CRAT,CRY2,CYP4F8,CYP8B1,DMXL2,DNAJB4,DNAJB5,DNAJB9,DOT1L,DYRK1B,EEPD1,EFTUD2,E…	243
Cancer,Organismal Injury and Abnormalities	non-melanoma solid tumor	Non-melanoma solid tumor	1.89e-08	1.23e-05		-0.518	-0.507	ABCB9,ABHD15,ABL1,ACSM5,ADAM11,ADAMTS7,ADIPOR2,AFAP1L1,AGO2,ALAS2,ALG12,ALG2,ALS2,AMACR,ANGPTL2,ANGPTL4,ANKRD13C,ANKRD33B,ANKS4B,AOX1,AQP9,ARL8B,ARNTL,ATP1B1,ATP2A2,AVPR1A,BACE1,BAG3,BANP,BCAR3,BLM,BMF,BNIP3,C1orf50,C1S,C4orf46,C6,CA14,CAMK2G,CAMSAP2,CAPRIN1,CASP8AP2,CBS/CBSL,CC2D2A,CCS,CDC42EP1,CDH17,CDKN1A,CFLAR,CHORDC1,CITED2,CNN3,CNTROB,COL4A1,CPT1B,CRAT,CRY2,CYP4F8,CYP8B1,DBP,DMXL2,DNAJB1,DN…	270
Cancer,Organismal Injury and Abnormalities	carcinoma	Carcinoma	1.92e-08	1.23e-05		0.371	0.379	ABCB9,ABHD15,ABL1,ACSM5,ADAM11,ADAMTS7,ADIPOR2,AFAP1L1,AGO2,ALAS2,ALG12,ALG2,ALS2,AMACR,ANGPTL2,ANGPTL4,ANKRD13C,ANKRD33B,ANKS4B,AOX1,AQP9,ARL8B,ARNTL,ATP1B1,ATP2A2,AVPR1A,BACE1,BAG3,BANP,BCAR3,BLM,BNIP3,C1orf50,C1S,C4orf46,C6,CA14,CAMK2G,CAMSAP2,CAPRIN1,CASP8AP2,CBS/CBSL,CC2D2A,CCS,CDC42EP1,CDH17,CDKN1A,CFLAR,CHORDC1,CITED2,CNN3,CNTROB,COL4A1,CPT1B,CRAT,CRY2,CYP4F8,CYP8B1,DBP,DMXL2,DNAJB1,DNAJB4…	268
Lipid Metabolism,Molecular Transport,Small Molecule Biochemistry	concentration	Concentration of lipid	2.07e-08	1.24e-05		0.766	0.742	ADIPOR2,AMACR,ANGPTL4,AQP9,ARNTL,ATP2A2,AVPR1A,BAG3,CBS/CBSL,CDKN1A,CRAT,CRY2,CYP8B1,ENPP2,FKBP4,G6PC,GCK,HIF1A,IL1R1,INPP5B,Irs3,KMT2C,LPIN1,MAPKAPK2,MERTK,NAMPT,NFIL3,NOS3,NR1H4,NRBF2,PLPP3,PPARD,PRKCI,RILP,SCD,SLC37A4,SPHK2,ST8SIA1,TG,VAV2,VTN,ZBTB16	42
Cancer,Gastrointestinal Disease,Organismal Injury and Abnormalities	large intestine adenocarcinoma	Large intestine adenocarcinoma	3.19e-08	1.78e-05				ABCB9,ABHD15,ABL1,ADAM11,ADAMTS7,ADIPOR2,AFAP1L1,ALAS2,ALG12,ALS2,AMACR,ANGPTL2,ANGPTL4,ANKRD13C,ANKRD33B,AOX1,AQP9,ARNTL,ATP1B1,ATP2A2,AVPR1A,BACE1,BAG3,BANP,BCAR3,BLM,BNIP3,C1orf50,C1S,C6,CA14,CAMSAP2,CAPRIN1,CASP8AP2,CBS/CBSL,CC2D2A,CCS,CDC42EP1,CDH17,CDKN1A,CFLAR,CHORDC1,CITED2,CNTROB,COL4A1,CPT1B,CRAT,CRY2,CYP4F8,CYP8B1,DMXL2,DNAJB4,DNAJB9,DOT1L,EEPD1,EFTUD2,EHD3,EIF2AK3,ELL2,ENPP2,ENTPD8,ER…	211
Cancer,Organismal Injury and Abnormalities	abdominal neoplasm	Abdominal neoplasm	3.65e-08	1.86e-05		-0.709	-0.697	ABCB9,ABHD15,ABL1,ACSM5,ADAM11,ADAMTS7,ADIPOR2,AFAP1L1,AGO2,ALAS2,ALG12,ALS2,AMACR,ANGPTL2,ANGPTL4,ANKRD13C,ANKRD33B,ANKRD46,ANKS4B,AOX1,AQP9,ARNTL,ATP1B1,ATP2A2,AVPR1A,BACE1,BAG3,BANP,BCAR3,BLM,BNIP3,C1orf50,C1S,C6,CA14,CAMK2G,CAMSAP2,CAPRIN1,CASP8AP2,CBS/CBSL,CC2D2A,CCS,CDC42EP1,CDH17,CDKN1A,CFLAR,CHORDC1,CITED2,CNTROB,COL4A1,CPT1B,CRAT,CRY2,CYP4F8,CYP8B1,DMXL2,DNAJB4,DNAJB5,DNAJB9,DOT1L,DYRK1B…	258
Cancer,Gastrointestinal Disease,Organismal Injury and Abnormalities	large intestine carcinoma	Large intestine carcinoma	3.79e-08	1.86e-05				ABCB9,ABHD15,ABL1,ADAM11,ADAMTS7,ADIPOR2,AFAP1L1,ALAS2,ALG12,ALS2,AMACR,ANGPTL2,ANGPTL4,ANKRD13C,ANKRD33B,AOX1,AQP9,ARNTL,ATP1B1,ATP2A2,AVPR1A,BACE1,BAG3,BANP,BCAR3,BLM,BNIP3,C1orf50,C1S,C6,CA14,CAMSAP2,CAPRIN1,CASP8AP2,CBS/CBSL,CC2D2A,CCS,CDC42EP1,CDH17,CDKN1A,CFLAR,CHORDC1,CITED2,CNTROB,COL4A1,CPT1B,CRAT,CRY2,CYP4F8,CYP8B1,DMXL2,DNAJB4,DNAJB9,DOT1L,EEPD1,EFTUD2,EHD3,EIF2AK3,ELL2,ENPP2,ENTPD8,ER…	212
Cancer,Organismal Injury and Abnormalities	abdominal cancer	Abdominal cancer	4.74e-08	2.2e-05		-0.91	-0.9	ABCB9,ABHD15,ABL1,ACSM5,ADAM11,ADAMTS7,ADIPOR2,AFAP1L1,AGO2,ALAS2,ALG12,ALS2,AMACR,ANGPTL2,ANGPTL4,ANKRD13C,ANKRD33B,ANKS4B,AOX1,AQP9,ARNTL,ATP1B1,ATP2A2,AVPR1A,BACE1,BAG3,BANP,BCAR3,BLM,BNIP3,C1orf50,C1S,C6,CA14,CAMK2G,CAMSAP2,CAPRIN1,CASP8AP2,CBS/CBSL,CC2D2A,CCS,CDC42EP1,CDH17,CDKN1A,CFLAR,CHORDC1,CITED2,CNTROB,COL4A1,CPT1B,CRAT,CRY2,CYP4F8,CYP8B1,DMXL2,DNAJB4,DNAJB5,DNAJB9,DOT1L,DYRK1B,EEPD1,E…	255
Cancer,Gastrointestinal Disease,Organismal Injury and Abnormalities	gastrointestinal carcinoma	Gastrointestinal carcinoma	5.35e-08	2.31e-05				ABCB9,ABHD15,ABL1,ADAM11,ADAMTS7,ADIPOR2,AFAP1L1,AGO2,ALAS2,ALG12,ALS2,AMACR,ANGPTL2,ANGPTL4,ANKRD13C,ANKRD33B,AOX1,AQP9,ARNTL,ATP1B1,ATP2A2,AVPR1A,BACE1,BAG3,BANP,BCAR3,BLM,BNIP3,C1orf50,C1S,C6,CA14,CAMSAP2,CAPRIN1,CASP8AP2,CBS/CBSL,CC2D2A,CCS,CDC42EP1,CDH17,CDKN1A,CFLAR,CHORDC1,CITED2,CNTROB,COL4A1,CPT1B,CRAT,CRY2,CYP4F8,CYP8B1,DMXL2,DNAJB4,DNAJB5,DNAJB9,DOT1L,EEPD1,EFTUD2,EHD3,EIF2AK3,ELL2,ENP…	220
Developmental Disorder	growth failure	Growth Failure	5.62e-08	2.31e-05		1.678	1.913	AGO2,ARNTL,BACE1,BLM,CBS/CBSL,CDKN1A,CFLAR,DOT1L,EFTUD2,EIF2AK3,ENPP2,F11,FAM20C,FBXW7,FKBP4,G6PC,GCK,HIF1A,HSD17B2,Irs3,KMT2C,MTHFR,NOS3,PLPP3,PPARD,PRKCI,RAD51D,SLC20A1,SLC37A4,SOX13,TEAD1,TFRC,Wasl	33
Cancer,Organismal Injury and Abnormalities	cancer	Cancer of cells	5.81e-08	2.31e-05		0.318	0.304	ABHD15,ABL1,ACSM5,ADAMTS7,AFAP1L1,AGO2,ALS2,AMACR,ANGPTL2,ANGPTL4,ANKRD33B,AOX1,ATP1B1,ATP2A2,AVPR1A,BANP,BLM,BMF,C6,CAMSAP2,CASP8AP2,CDC42EP1,CDH17,CDKN1A,CFLAR,CITED2,CNTROB,COL4A1,CYP4F8,CYP8B1,DMXL2,DNAJB5,EFTUD2,EIF2AK3,ENPP2,ERC1,F11,FADS3,FBXW7,FCGR3A/FCGR3B,FZD6,GADD45G,GCH1,GCK,GEMIN5,GRHPR,GYS2,HBB,HDAC11,HEATR1,HIF1A,HSP90B1,HSPH1,IER3,IL1R1,INPP5B,INSC,IPO7,IRX1,KCNH1,KLF3,KMT2C,LGALS…	132
Organismal Survival	organismal death	Organismal death	6.44e-08	2.45e-05		1.952	2.294	ABL1,AGO2,ALAS2,ALG2,AMACR,ANGPTL4,ARL8B,ARNTL,ATP1B1,ATP2A2,BACE1,BAG3,BLM,BMF,CA14,CAPRIN1,CBS/CBSL,CCS,CDH17,CDKN1A,CFLAR,CITED2,CNN3,COL4A1,CPT1B,DNAJB1,DNAJB4,DNAJB9,DOT1L,EHD3,EIF2AK3,ENPP2,ERC1,ERF,F11,FAM20C,FBXW7,FKBP4,Fus,FZD5,G6PC,GCH1,GCK,GSS,HIF1A,HSD17B2,HSP90B1,IL1R1,INPP5B,KDM4A,KIF1B,KLF3,KMT2C,MAPKAPK2,MCM10,MERTK,Mocs1,Mt1,MTHFR,MYCBP2,NAB2,NCK1,NCOR2,NDRG2,NFIL3,NOS3,NR1H4,PGK…	88
Cancer,Gastrointestinal Disease,Organismal Injury and Abnormalities	digestive system cancer	Digestive system cancer	7e-08	2.54e-05		-0.719	-0.703	ABCB9,ABHD15,ABL1,ACSM5,ADAM11,ADAMTS7,ADIPOR2,AFAP1L1,AGO2,ALAS2,ALG12,ALS2,AMACR,ANGPTL2,ANGPTL4,ANKRD13C,ANKRD33B,AOX1,AQP9,ARNTL,ATP1B1,ATP2A2,AVPR1A,BACE1,BAG3,BANP,BCAR3,BLM,BNIP3,C1orf50,C1S,C6,CA14,CAMK2G,CAMSAP2,CAPRIN1,CASP8AP2,CBS/CBSL,CC2D2A,CCS,CDC42EP1,CDH17,CDKN1A,CFLAR,CHORDC1,CITED2,CNTROB,COL4A1,CPT1B,CRAT,CRY2,CYP4F8,CYP8B1,DMXL2,DNAJB4,DNAJB5,DNAJB9,DOT1L,EEPD1,EFTUD2,EHD3,EIF…	243
Cancer,Organismal Injury and Abnormalities	malignant solid tumor	Malignant solid tumor	8.23e-08	2.86e-05		-0.927	-0.926	ABCB9,ABHD15,ABL1,ACSM5,ADAM11,ADAMTS7,ADIPOR2,AFAP1L1,AGO2,ALAS2,ALG12,ALG2,ALS2,AMACR,ANGPTL2,ANGPTL4,ANKRD13C,ANKRD33B,ANKRD46,ANKS4B,AOX1,AQP9,ARL8B,ARNTL,ATP1B1,ATP2A2,AVPR1A,BACE1,BAG3,BANP,BCAR3,BLM,BMF,BNIP3,C1orf50,C1S,C4orf46,C6,CA14,CALCOCO1,CAMK2G,CAMSAP2,CAPRIN1,CASP8AP2,CBS/CBSL,CC2D2A,CCS,CDC42EP1,CDH17,CDKN1A,CFLAR,CHORDC1,CITED2,CNN3,CNTROB,COL4A1,CPT1B,CRAT,CRY2,CYP4F8,CYP8B1,DB…	274
Cancer,Gastrointestinal Disease,Organismal Injury and Abnormalities	digestive organ tumor	Digestive organ tumor	1.25e-07	4.14e-05		-0.177	-0.158	ABCB9,ABHD15,ABL1,ACSM5,ADAM11,ADAMTS7,ADIPOR2,AFAP1L1,AGO2,ALAS2,ALG12,ALS2,AMACR,ANGPTL2,ANGPTL4,ANKRD13C,ANKRD33B,ANKRD46,AOX1,AQP9,ARNTL,ATP1B1,ATP2A2,AVPR1A,BACE1,BAG3,BANP,BCAR3,BLM,BNIP3,C1orf50,C1S,C6,CA14,CAMK2G,CAMSAP2,CAPRIN1,CASP8AP2,CBS/CBSL,CC2D2A,CCS,CDC42EP1,CDH17,CDKN1A,CFLAR,CHORDC1,CITED2,CNTROB,COL4A1,CPT1B,CRAT,CRY2,CYP4F8,CYP8B1,DMXL2,DNAJB4,DNAJB5,DNAJB9,DOT1L,EEPD1,EFTUD2,…	246
Cancer,Gastrointestinal Disease,Organismal Injury and Abnormalities	gastrointestinal adenocarcinoma	Gastrointestinal adenocarcinoma	1.29e-07	4.14e-05				ABCB9,ABHD15,ABL1,ADAM11,ADAMTS7,ADIPOR2,AFAP1L1,ALAS2,ALG12,ALS2,AMACR,ANGPTL2,ANGPTL4,ANKRD13C,ANKRD33B,AOX1,AQP9,ARNTL,ATP1B1,ATP2A2,AVPR1A,BACE1,BAG3,BANP,BCAR3,BLM,BNIP3,C1orf50,C1S,C6,CA14,CAMSAP2,CAPRIN1,CASP8AP2,CBS/CBSL,CC2D2A,CCS,CDC42EP1,CDH17,CDKN1A,CFLAR,CHORDC1,CITED2,CNTROB,COL4A1,CPT1B,CRAT,CRY2,CYP4F8,CYP8B1,DMXL2,DNAJB4,DNAJB9,DOT1L,EEPD1,EFTUD2,EHD3,EIF2AK3,ELL2,ENPP2,ENTPD8,ER…	213
Cancer,Gastrointestinal Disease,Organismal Injury and Abnormalities	hepatobiliary carcinoma	Hepatobiliary carcinoma	1.4e-07	4.34e-05		0.308	0.325	ABL1,ADIPOR2,AFAP1L1,AGO2,ALS2,AOX1,ARNTL,ATP1B1,ATP2A2,BACE1,BANP,BLM,C1orf50,C1S,CAMK2G,CASP8AP2,CCS,CDH17,CDKN1A,CFLAR,CHORDC1,COL4A1,CPT1B,CYP4F8,DMXL2,DNAJB5,DNAJB9,DOT1L,EHD3,EIF2AK3,ELL2,ENPP2,FAM20C,FBXW7,FNIP2,G6PC,GCH1,GCK,GPRIN3,GRHPR,GYS2,HBB,HEATR1,HIF1A,HLA-E,HSP90B1,HSPH1,IDO2,IFFO1,INPP5B,INTS2,IPO7,IRX1,KCNH1,KIAA2026,KIF1B,KLF3,KMT2C,LGALS9B,LSG1,MCMDC2,MDC1,MDN1,MED14,MERTK,MIC…	131
Cancer,Gastrointestinal Disease,Hepatic System Disease,Organismal Injury and Abnormalities	hepatobiliary system cancer	Hepatobiliary system cancer	1.84e-07	5.48e-05		0.293	0.306	ABL1,ADIPOR2,AFAP1L1,AGO2,ALS2,AOX1,ARNTL,ATP1B1,ATP2A2,BACE1,BANP,BLM,C1orf50,C1S,CAMK2G,CASP8AP2,CCS,CDH17,CDKN1A,CFLAR,CHORDC1,COL4A1,CPT1B,CYP4F8,DMXL2,DNAJB5,DNAJB9,DOT1L,EHD3,EIF1AX,EIF2AK3,ELL2,ENPP2,FAM20C,FBXW7,FNIP2,G6PC,GCH1,GCK,GPRIN3,GRHPR,GYS2,HBB,HEATR1,HIF1A,HLA-E,HSP90B1,HSPH1,IDO2,IFFO1,INPP5B,INTS2,IPO7,IRX1,KCNH1,KIAA2026,KIF1B,KLF3,KMT2C,LGALS9B,LSG1,MCMDC2,MDC1,MDN1,MED14,ME…	134
Cancer,Organismal Injury and Abnormalities	neoplasia	Neoplasia of cells	1.96e-07	5.63e-05		1.071	1.04	ABHD15,ABL1,ACSM5,ADAMTS7,AFAP1L1,AGO2,ALS2,AMACR,ANGPTL2,ANGPTL4,ANKRD33B,AOX1,ARNTL,ATP1B1,ATP2A2,AVPR1A,BANP,BLM,BMF,C6,CAMSAP2,CASP8AP2,CC2D2A,CDC42EP1,CDH17,CDKN1A,CFLAR,CHORDC1,CITED2,CNTROB,COL4A1,CPT1B,CRAT,CYP4F8,CYP8B1,DMXL2,DNAJB4,DNAJB5,DOT1L,EFTUD2,EIF2AK3,ENPP2,ERC1,ERF,F11,FADS3,FBXW7,FCGR3A/FCGR3B,FZD6,GADD45G,GCH1,GCK,GEMIN5,GRHPR,GYS2,HBB,HDAC11,HDHD3,HEATR1,HIF1A,HPS4,HSP90B1,H…	149
Cellular Compromise,Cellular Function and Maintenance	endoplasmic reticulum stress response	Endoplasmic reticulum stress response	2.06e-07	5.73e-05		1.02	0.996	ABL1,ANKS4B,ATP2A2,BNIP3,COL4A1,DNAJB1,DNAJB4,DNAJB5,DNAJB9,EIF2AK3,FICD,HSP90B1,HSPH1,NOX4,NRBF2	15
Gastrointestinal Disease,Hepatic System Disease,Organismal Injury and Abnormalities	liver lesion	Liver lesion	2.42e-07	6.43e-05		0.018	0.058	ABL1,ADIPOR2,AFAP1L1,AGO2,ALS2,AMACR,ANKRD46,AOX1,ARNTL,ATP1B1,ATP2A2,BACE1,BANP,BLM,BMF,C1orf50,C1S,CAMK2G,CASP8AP2,CBS/CBSL,CC2D2A,CCS,CDH17,CDKN1A,CFLAR,CHORDC1,COL4A1,CPT1B,CYP4F8,DMXL2,DNAJB5,DNAJB9,DOT1L,EHD3,EIF1AX,ELL2,ENPP2,F11,FAM20C,FBXW7,FCGR3A/FCGR3B,FGD5,FNIP2,FZD6,G6PC,GCH1,GCK,GPRIN3,GRHPR,GSS,GYS2,H2BC10,HBB,HEATR1,HIF1A,HLA-E,HSD17B2,HSP90B1,HSPH1,IDO2,IER3,IFFO1,IL1R1,INPP5B,IN…	148
Organismal Injury and Abnormalities,Reproductive System Disease	disorder of pregnancy	Disorder of pregnancy	2.46e-07	6.43e-05				AGO2,ANGPTL2,ARL8B,ATP2A2,C1S,CALCOCO1,CBS/CBSL,CDH17,DBP,DNAJB9,EIF2AK3,ENPP2,ERF,FCGR3A/FCGR3B,GSS,HBB,HSD17B2,HSP90B1,IL1R1,KCNH1,MTHFR,NOS3,NOX4,OSBPL11,PCDH12,PDE12,PPARD,PRRG1,SLC20A1,SLC39A10,TEF,THNSL1,TUBB2A,ZBTB16	34
Lipid Metabolism,Molecular Transport,Small Molecule Biochemistry	quantity	Quantity of steroid	3.33e-07	8.43e-05		1.343	1.343	ADIPOR2,AMACR,ANGPTL4,ARNTL,AVPR1A,BAG3,CBS/CBSL,CDKN1A,CRAT,CRY2,CYP8B1,FKBP4,G6PC,GCK,IL1R1,KMT2C,MAPKAPK2,NAMPT,NFIL3,NOS3,NR1H4,PPARD,SCD,SLC37A4,TG,VAV2,ZBTB16	27
Molecular Transport	transport	Transport of metal	3.76e-07	9.23e-05		-0.059	-0.1	ALAS2,ATP1B1,ATP2A2,CAMK2G,CCS,FKBP4,GCH1,HIF1A,KCNH1,Mt1,Mt1m/Mt2A,NDRG2,NEDD9,NIPAL1,NOS3,PPME1,SFXN1,SLC20A1,SLC38A3,SLC39A10,SLC8B1,TFRC,TG,WNK1	24
Cancer,Organismal Injury and Abnormalities	extracranial solid tumor	Extracranial solid tumor	4.8e-07	0.000115		0.11	0.115	ABCB9,ABHD15,ABL1,ACSM5,ADAM11,ADAMTS7,ADIPOR2,AFAP1L1,AGO2,ALAS2,ALG12,ALG2,ALS2,AMACR,ANGPTL2,ANGPTL4,ANKRD13C,ANKRD33B,ANKRD46,ANKS4B,AOX1,AQP9,ARL8B,ARNTL,ATP1B1,ATP2A2,AVPR1A,BACE1,BAG3,BANP,BCAR3,BLM,BNIP3,C1orf50,C1S,C4orf46,C6,CA14,CALCOCO1,CAMK2G,CAMSAP2,CAPRIN1,CASP8AP2,CBS/CBSL,CC2D2A,CCS,CDC42EP1,CDH17,CDKN1A,CFLAR,CHORDC1,CITED2,CNN3,CNTROB,COL4A1,CPT1B,CRAT,CRY2,CYP4F8,CYP8B1,DBP,DM…	272
Cardiovascular Disease,Organismal Injury and Abnormalities	peripheral vascular disease	Peripheral vascular disease	5.72e-07	0.000133		1.195	1.205	BAG3,CA14,CAMK2G,CHORDC1,COL4A1,DNAJB1,DNAJB4,DNAJB5,F11,FCGR3A/FCGR3B,HBB,HIF1A,HSPH1,IL1R1,MAT1A,MTHFR,NEDD9,NOS3,NOX4,PPARD,SLCO2B1,SUCO,THBD,TRIM14,TUBB2A,UNG	26
Cancer,Gastrointestinal Disease,Organismal Injury and Abnormalities	malignant neoplasm of large intestine	Malignant neoplasm of large intestine	5.95e-07	0.000134		-1.961	-1.951	ABCB9,ABHD15,ABL1,ADAM11,ADAMTS7,ADIPOR2,AFAP1L1,ALAS2,ALG12,ALS2,AMACR,ANGPTL2,ANGPTL4,ANKRD13C,ANKRD33B,AOX1,AQP9,ARNTL,ATP1B1,ATP2A2,AVPR1A,BACE1,BAG3,BANP,BCAR3,BLM,BNIP3,C1orf50,C1S,C6,CA14,CAMSAP2,CAPRIN1,CASP8AP2,CBS/CBSL,CC2D2A,CCS,CDC42EP1,CDH17,CDKN1A,CFLAR,CHORDC1,CITED2,CNTROB,COL4A1,CPT1B,CRAT,CRY2,CYP4F8,CYP8B1,DMXL2,DNAJB4,DNAJB9,DOT1L,EEPD1,EFTUD2,EHD3,EIF2AK3,ELL2,ENPP2,ENTPD8,ER…	216
Lipid Metabolism,Molecular Transport,Small Molecule Biochemistry	concentration	Concentration of triacylglycerol	6.5e-07	0.000143		0.554	0.556	ADIPOR2,AMACR,ANGPTL4,AQP9,ARNTL,ATP2A2,BAG3,CBS/CBSL,FKBP4,G6PC,GCK,Irs3,LPIN1,NAMPT,NFIL3,NOS3,NR1H4,PPARD,PRKCI,SCD,SLC37A4	21
Lipid Metabolism,Molecular Transport,Small Molecule Biochemistry	concentration	Concentration of acylglycerol	6.9e-07	0.000148		0.542	0.534	ADIPOR2,AMACR,ANGPTL4,AQP9,ARNTL,ATP2A2,BAG3,CBS/CBSL,FKBP4,G6PC,GCK,Irs3,LPIN1,NAMPT,NFIL3,NOS3,NR1H4,PLPP3,PPARD,PRKCI,SCD,SLC37A4	22
Cancer,Organismal Injury and Abnormalities,Reproductive System Disease	genital tumor	Genital tumor	7.38e-07	0.000154				ABCB9,ABHD15,ABL1,ADAMTS7,ADIPOR2,AGO2,ALS2,AMACR,ANKS4B,AOX1,AQP9,AVPR1A,BACE1,BANP,BCAR3,BLM,C1S,C6,CASP8AP2,CBS/CBSL,CC2D2A,CDC42EP1,CDH17,CDKN1A,CFLAR,CNTROB,COL4A1,CPT1B,CRAT,CRY2,CYP4F8,DMXL2,DNAJB5,DOT1L,DYRK1B,EFTUD2,EHD3,EIF1AX,EIF2AK3,ELL2,ENPP2,ERC1,F11,FADS3,FAM20C,FBXW7,FCGR3A/FCGR3B,FGD5,FKBP4,FNIP2,FZD6,G6PC,GCK,GEMIN5,GPR146,GPRIN3,GRHPR,GYS2,H2BC10,HBB,HDHD3,HEATR1,HIF1A,HLA-E,HS…	165
Cancer,Gastrointestinal Disease,Organismal Injury and Abnormalities	gastrointestinal tract cancer	Gastrointestinal tract cancer	9.66e-07	0.000197		-1.432	-1.414	ABCB9,ABHD15,ABL1,ADAM11,ADAMTS7,ADIPOR2,AFAP1L1,AGO2,ALAS2,ALG12,ALS2,AMACR,ANGPTL2,ANGPTL4,ANKRD13C,ANKRD33B,AOX1,AQP9,ARNTL,ATP1B1,ATP2A2,AVPR1A,BACE1,BAG3,BANP,BCAR3,BLM,BNIP3,C1orf50,C1S,C6,CA14,CAMSAP2,CAPRIN1,CASP8AP2,CBS/CBSL,CC2D2A,CCS,CDC42EP1,CDH17,CDKN1A,CFLAR,CHORDC1,CITED2,CNTROB,COL4A1,CPT1B,CRAT,CRY2,CYP4F8,CYP8B1,DMXL2,DNAJB4,DNAJB5,DNAJB9,DOT1L,EEPD1,EFTUD2,EHD3,EIF2AK3,ELL2,ENP…	223
Cancer,Organismal Injury and Abnormalities	genitourinary adenocarcinoma	Genitourinary adenocarcinoma	9.92e-07	0.000197				ABCB9,ABHD15,ABL1,ADAMTS7,ADIPOR2,ALAS2,ALS2,AMACR,ANKS4B,AOX1,AQP9,AVPR1A,BACE1,BANP,BCAR3,BLM,C1S,C6,CASP8AP2,CBS/CBSL,CC2D2A,CDC42EP1,CDH17,CDKN1A,CFLAR,CNTROB,COL4A1,CPT1B,CRAT,CRY2,CYP4F8,DMXL2,DNAJB5,DOT1L,DYRK1B,EFTUD2,EHD3,EIF1AX,EIF2AK3,ELL2,ENPP2,ERC1,F11,FADS3,FBXW7,FGD5,FNIP2,FZD6,G6PC,GCK,GEMIN5,GPR146,GPRIN3,GRHPR,H2BC10,HBB,HDHD3,HEATR1,HIF1A,HLA-E,HSP90B1,HSPH1,IDO2,IER3,IL1R1,INS…	155
Cancer,Organismal Injury and Abnormalities	pelvic tumor	Pelvic tumor	1.04e-06	0.000203				ABCB9,ABHD15,ABL1,ADAMTS7,ADIPOR2,AFAP1L1,AGO2,ALS2,AMACR,ANGPTL2,ANKS4B,AOX1,AQP9,AVPR1A,BACE1,BANP,BCAR3,BLM,C1S,C6,CAMK2G,CASP8AP2,CBS/CBSL,CC2D2A,CDC42EP1,CDH17,CDKN1A,CFLAR,CNTROB,COL4A1,CPT1B,CRAT,CRY2,CYP4F8,DMXL2,DNAJB5,DOT1L,DYRK1B,EFTUD2,EHD3,EIF1AX,EIF2AK3,ELL2,ENPP2,ERC1,F11,FADS3,FBXW7,FCGR3A/FCGR3B,FGD5,FKBP4,FNIP2,FZD6,G6PC,GCK,GEMIN5,GPR146,GPRIN3,GRHPR,GYS2,H2BC10,HBB,HDHD3,HEATR…	173
Cancer,Organismal Injury and Abnormalities,Reproductive System Disease	genital tract cancer	Genital tract cancer	1.09e-06	0.000207				ABCB9,ABHD15,ABL1,ADAMTS7,ADIPOR2,AGO2,ALS2,AMACR,ANKS4B,AOX1,AQP9,AVPR1A,BACE1,BANP,BCAR3,BLM,C1S,C6,CASP8AP2,CBS/CBSL,CC2D2A,CDC42EP1,CDH17,CDKN1A,CFLAR,CNTROB,COL4A1,CPT1B,CRAT,CRY2,CYP4F8,DMXL2,DNAJB5,DOT1L,DYRK1B,EFTUD2,EHD3,EIF1AX,EIF2AK3,ELL2,ENPP2,ERC1,F11,FADS3,FAM20C,FBXW7,FCGR3A/FCGR3B,FGD5,FKBP4,FNIP2,FZD6,G6PC,GCK,GEMIN5,GPR146,GPRIN3,GRHPR,GYS2,H2BC10,HBB,HDHD3,HEATR1,HIF1A,HLA-E,HS…	162
Cardiovascular Disease,Organismal Injury and Abnormalities	peripheral arterial disease	Peripheral arterial disease	1.21e-06	0.000224				BAG3,CAMK2G,CHORDC1,DNAJB1,DNAJB4,DNAJB5,FCGR3A/FCGR3B,HBB,HSPH1,MTHFR,NEDD9,PPARD,SLCO2B1,SUCO,TRIM14,TUBB2A	16
Molecular Transport	transport	Transport of molecule	1.25e-06	0.000228		-0.768	-0.893	ABCB9,ADIPOR2,ALAS2,AQP9,ARNTL,ATP1B1,ATP2A2,AVPR1A,BAG3,CA14,CAMK2G,CCS,CDH17,CDKN1A,CITED2,CPT1B,CRAT,CRY2,ELL2,ERP29,FKBP4,G6PC,GCH1,GCK,HBB,HIF1A,HSD17B2,IPO7,KCNH1,KIF1B,Mt1,Mt1m/Mt2A,NDRG2,NEDD9,NFIL3,NIPAL1,NOS3,NR1H4,PPARD,PPME1,PRKCI,PTPRN,RILP,SCD,SFXN1,SLC20A1,SLC20A2,SLC25A10,SLC25A19,Slc25a22,SLC2A5,SLC2A9,SLC37A4,SLC38A3,SLC38A4,SLC39A10,SLC45A3,SLC8B1,SLCO2B1,TFRC,TG,WNK1	62
Cancer,Organismal Injury and Abnormalities	genitourinary carcinoma	Genitourinary carcinoma	1.32e-06	0.000234				ABCB9,ABHD15,ABL1,ADAMTS7,ADIPOR2,AGO2,ALAS2,ALS2,AMACR,ANGPTL2,ANKS4B,AOX1,AQP9,AVPR1A,BACE1,BANP,BCAR3,BLM,C1S,C6,CAMK2G,CASP8AP2,CBS/CBSL,CC2D2A,CDC42EP1,CDH17,CDKN1A,CFLAR,CNTROB,COL4A1,CPT1B,CRAT,CRY2,CYP4F8,DMXL2,DNAJB5,DOT1L,DYRK1B,EFTUD2,EHD3,EIF1AX,EIF2AK3,ELL2,ENPP2,ERC1,F11,FADS3,FAM20C,FBXW7,FGD5,FNIP2,FZD6,G6PC,GCK,GEMIN5,GPR146,GPRIN3,GRHPR,GYS2,H2BC10,HBB,HDHD3,HEATR1,HIF1A,HLA-E,H…	169
Cancer,Organismal Injury and Abnormalities	pelvic cancer	Pelvic cancer	1.62e-06	0.000282				ABCB9,ABHD15,ABL1,ADAMTS7,ADIPOR2,AFAP1L1,AGO2,ALS2,AMACR,ANGPTL2,ANKS4B,AOX1,AQP9,AVPR1A,BACE1,BANP,BCAR3,BLM,C1S,C6,CAMK2G,CASP8AP2,CBS/CBSL,CC2D2A,CDC42EP1,CDH17,CDKN1A,CFLAR,CNTROB,COL4A1,CPT1B,CRAT,CRY2,CYP4F8,DMXL2,DNAJB5,DOT1L,DYRK1B,EFTUD2,EHD3,EIF1AX,EIF2AK3,ELL2,ENPP2,ERC1,F11,FADS3,FBXW7,FCGR3A/FCGR3B,FGD5,FKBP4,FNIP2,FZD6,G6PC,GCK,GEMIN5,GPR146,GPRIN3,GRHPR,GYS2,H2BC10,HBB,HDHD3,HEATR…	170
Cancer,Gastrointestinal Disease,Hepatic System Disease,Organismal Injury and Abnormalities	liver carcinoma	Liver carcinoma	1.99e-06	0.000339		0.308	0.328	ABL1,ADIPOR2,AFAP1L1,AGO2,ALS2,AOX1,ARNTL,ATP1B1,ATP2A2,BACE1,BANP,BLM,C1orf50,C1S,CAMK2G,CASP8AP2,CCS,CDH17,CDKN1A,CFLAR,CHORDC1,COL4A1,CPT1B,CYP4F8,DMXL2,DNAJB5,DNAJB9,DOT1L,EHD3,ELL2,ENPP2,FAM20C,FBXW7,FNIP2,G6PC,GCH1,GCK,GPRIN3,GRHPR,GYS2,HBB,HEATR1,HIF1A,HSP90B1,HSPH1,IDO2,IFFO1,INPP5B,INTS2,IPO7,IRX1,KIAA2026,KIF1B,KLF3,KMT2C,LSG1,MCMDC2,MDC1,MDN1,MED14,MERTK,MICAL2,MRNIP,Mt1,MYCBP2,NCOR2,N…	121
Neurological Disease,Organismal Injury and Abnormalities,Psychological Disorders	disorder of basal ganglia	Disorder of basal ganglia	2.16e-06	0.00036				ABL1,ATP1B1,ATP2A2,BANP,CFLAR,CPT1B,CRAT,DBP,DNAJB1,FBXW7,FKBP4,G6PC,GCH1,IER3,KIF1B,Klf16,KLF3,MERTK,NDRG2,PDE6C,PGK1,PIAS3,POU3F1,PPARD,RHOBTB3,SCD,SLC20A2,SLC25A19,ST8SIA1,STMN1,TOR1A,TUBB2A,USP36,WNK1,ZBTB16	35
Cancer,Gastrointestinal Disease,Hepatic System Disease,Organismal Injury and Abnormalities	cancer	Liver cancer	2.68e-06	0.000439		0.293	0.308	ABL1,ADIPOR2,AFAP1L1,AGO2,ALS2,AOX1,ARNTL,ATP1B1,ATP2A2,BACE1,BANP,BLM,C1orf50,C1S,CAMK2G,CASP8AP2,CCS,CDH17,CDKN1A,CFLAR,CHORDC1,COL4A1,CPT1B,CYP4F8,DMXL2,DNAJB5,DNAJB9,DOT1L,EHD3,EIF1AX,ELL2,ENPP2,FAM20C,FBXW7,FNIP2,G6PC,GCH1,GCK,GPRIN3,GRHPR,GYS2,HBB,HEATR1,HIF1A,HSP90B1,HSPH1,IDO2,IFFO1,INPP5B,INTS2,IPO7,IRX1,KIAA2026,KIF1B,KLF3,KMT2C,LSG1,MCMDC2,MDC1,MDN1,MED14,MERTK,MICAL2,MRNIP,Mt1,MTHFR,M…	124
Lipid Metabolism,Molecular Transport,Small Molecule Biochemistry	concentration	Concentration of cholesterol	2.77e-06	0.000444		0.693	0.707	ADIPOR2,AMACR,ANGPTL4,ARNTL,BAG3,CBS/CBSL,CDKN1A,CYP8B1,G6PC,GCK,MAPKAPK2,NAMPT,NFIL3,NOS3,NR1H4,PPARD,SCD,SLC37A4,TG	19
Cellular Movement	invasion	Invasion of cells	3.77e-06	0.000594		-0.343	-0.441	ABL1,ADAMTS7,AFAP1L1,AGO2,ANGPTL4,BCAR3,CAMK2G,CDKN1A,CEMIP2,DNAJB4,DYRK1B,ENPP2,ERC1,FBXW7,HIF1A,HSP90B1,IER3,IL1R1,IPO7,IRX1,MAPKAPK2,MERTK,NAMPT,NDRG2,NEDD9,NFIL3,NOS3,NOX4,NR1H4,PIAS3,PLEKHG6,PPARD,PRKCI,SEPTIN11,SPHK2,ST8SIA1,STMN1,TEAD1,THBD,VAV2,VTN,WNK1,YWHAG,ZBTB16	44
Cardiovascular Disease	disorder of blood pressure	Disorder of blood pressure	4.61e-06	0.000713		0.883	0.916	ABL1,ANGPTL2,ARL8B,ARNTL,ATP2A2,AVPR1A,C1S,CA14,CALCOCO1,CDH17,DBP,DNAJB9,EIF2AK3,GSS,HIF1A,IL1R1,KCNH1,MTHFR,NOS3,NOX4,OSBPL11,PCDH12,PDE12,PPARD,PRKCI,PRRG1,SLC2A5,SLC39A10,TEF,THBD,THNSL1,VAV2,WNK1,ZBTB16	34
Lipid Metabolism,Small Molecule Biochemistry	conversion	Conversion of lipid	5e-06	0.000759		0.165	0.108	AMACR,ANGPTL4,CPT1B,CRAT,ENPP2,HSD17B2,INPP5B,Mt1,NOX4,NR1H4,SCD,SPHK2	12
Endocrine System Development and Function	glucose tolerance	Glucose tolerance	9.83e-06	0.00147	Decreased	-2.183	-2.214	ADIPOR2,ANGPTL2,ANGPTL4,ARNTL,ATP2A2,CDKN1A,EIF2AK3,GCK,HIF1A,IL1R1,Irs3,NOS3,NR1H4,PPARD,PRKCI,PTPRN,SCD	17
Free Radical Scavenging,Molecular Transport	quantity	Quantity of reactive oxygen species	1.03e-05	0.00148		-0.25	-0.218	ABL1,ARNTL,CDKN1A,CITED2,DNAJB1,DYRK1B,GCH1,MAPKAPK2,Mt1,NOS3,NOX4,NR1H4,PPARD,ZBTB16	14
Inflammatory Response,Organismal Injury and Abnormalities	inflammation	Inflammation of organ	1.03e-05	0.00148		-0.146	-0.082	ABL1,ADIPOR2,AGO2,AMACR,ATP1B1,BLM,BMF,C6,CA14,CAMK2G,CBS/CBSL,CDKN1A,CNN3,COL4A1,EHD3,EIF2AK3,F11,FCGR3A/FCGR3B,FKBP4,GADD45G,GCH1,GSS,GYS2,HBB,HIF1A,HLA-E,HSP90B1,IDO2,IL1R1,KLF3,KMT2C,LGALS9B,LPIN1,MAPKAPK2,MAT1A,MERTK,Mt1,MTHFR,NCOR2,NFIL3,NOS3,NR1H4,PHLDB2,POU3F1,PPARD,PTPRN,SCD,SLC2A9,SPAG1,TFRC,THBD,TUBB2A	52
Hematological System Development and Function,Tissue Morphology	quantity	Quantity of leukocytes	1.04e-05	0.00148		-0.139	-0.215	ABL1,ARNTL,AVPR1A,BAG3,BLM,BMF,C6,CAMK2G,CBS/CBSL,CDH17,CDKN1A,CFLAR,F11,GADD45G,HBB,HIF1A,HSP90B1,IL1R1,KLF3,LGALS9B,MAPKAPK2,MERTK,Mt1,MYO9B,NEDD9,NFIL3,NR1H4,PRKCI,SLC37A4,SLC39A10,SOX13,SPHK2,ST8SIA1,TG,THBD,VAV2,VTN,Wasl,ZBTB16	39
Gene Expression	expression	Expression of RNA	1.09e-05	0.00152		0.689	0.619	ABL1,AGO2,ARNTL,ATP1B1,BANP,BLM,CALCOCO1,CAMK2G,CAPRIN1,CDKN1A,CFLAR,CITED2,CRY2,DBP,DNAJB1,DNAJB5,DOT1L,DYRK1B,EIF2AK3,ELL2,ERF,ERP29,FBXW7,FNIP2,Fus,FZD5,G6PC,GADD45G,GEMIN5,GSS,HBB,HEATR1,HIF1A,HSPH1,IRX1,KDM4A,KIF1B,Klf16,KLF3,KMT2C,LGALS9B,LPIN1,MAPKAPK2,MED14,NAB2,NAMPT,NCK1,NCOR2,NFIL3,NOX4,NR1D2,NR1H4,NRBF2,PER3,PIAS3,POU3F1,PPARD,PRKCI,PTPRN,RBM14,RNGTT,Rorc,Rps6ka5,SFPQ,SLC20A1,SLC35C2,…	77
Connective Tissue Development and Function,Tissue Morphology	mass	Mass of connective tissue	1.11e-05	0.00152				ADIPOR2,ANGPTL4,AVPR1A,CDKN1A,ENPP2,IL1R1,LPIN1,Mt1,NR1H4,PPARD,PRKCI,SCD,SLC2A5	13
Organismal Injury and Abnormalities,Renal and Urological Disease	renal lesion	Renal lesion	1.13e-05	0.00153		-0.554	-0.51	ABL1,ALAS2,AMACR,AOX1,AQP9,ATP1B1,BLM,C1S,CBS/CBSL,CDC42EP1,CDKN1A,CFLAR,EHD3,FBXW7,FNIP2,FZD6,GRHPR,HBB,HIF1A,HSP90B1,IL1R1,KIF1B,KLF3,KMT2C,LGALS9B,MDN1,MED14,MERTK,MICAL2,Mt1,MYCBP2,NCOR2,NOS3,NR1H4,PDHB,PIAS3,POU3F1,RBM14,SCD,SLC20A2,SLC2A9,STMN1,THBD,TMEM51,TOR1A,TSKU,TUBB2A,USP34,VAV2	49
Hematological System Development and Function,Tissue Morphology	quantity	Quantity of blood cells	1.42e-05	0.00189		-0.182	-0.254	ABL1,ARNTL,AVPR1A,BAG3,BLM,BMF,C6,CAMK2G,CBS/CBSL,CDH17,CDKN1A,CFLAR,F11,FBXW7,GADD45G,HBB,HIF1A,HSP90B1,IL1R1,KLF3,LGALS9B,MAPKAPK2,MERTK,Mt1,MYO9B,NEDD9,NFIL3,NR1H4,PRKCI,SLC20A1,SLC37A4,SLC39A10,SOX13,SPHK2,ST8SIA1,TFRC,TG,THBD,VAV2,VTN,Wasl,ZBTB16	42
Gene Expression	transcription	Transcription	1.55e-05	0.00202		0.512	0.435	ABL1,AGO2,ARNTL,ATP1B1,BANP,BLM,CALCOCO1,CDKN1A,CFLAR,CITED2,CRY2,DBP,DNAJB5,DOT1L,DYRK1B,EIF2AK3,ELL2,ERF,ERP29,FBXW7,FNIP2,Fus,FZD5,G6PC,GADD45G,HBB,HEATR1,Hells/LOC100911660,HIF1A,HSPH1,IRX1,KDM4A,KIF1B,Klf16,KLF3,KMT2C,LGALS9B,LPIN1,MAPKAPK2,MED14,MERTK,NAB2,NAMPT,NCK1,NCOR2,NFIL3,NR1D2,NR1H4,NRBF2,PER3,PIAS3,POU3F1,PPARD,PRKCI,PTPRN,RBM14,RNGTT,Rorc,Rps6ka5,SFPQ,SLC20A1,SLC35C2,TARBP1,TEAD1,…	73
Cellular Development,Cellular Growth and Proliferation,Hematological System Development and Function,Lymphoid Tissue Structure and Development	proliferation	Proliferation of mononuclear leukocytes	1.62e-05	0.00208		-0.022	-0.082	ABL1,AMACR,BLM,CBS/CBSL,CDKN1A,CFLAR,EHD3,FCGR3A/FCGR3B,Fus,GCH1,Hells/LOC100911660,HIF1A,HLA-E,HSP90B1,IL1R1,KLF3,LGALS9B,LPIN1,MERTK,NCK1,NCOR2,NFIL3,PTPRN,SLC39A10,SOX13,SPHK2,ST8SIA1,TFRC,TG,UNG,VAV2,Wasl,ZBTB16	33
Cancer,Organismal Injury and Abnormalities	genitourinary tumor	Genitourinary tumor	1.65e-05	0.00208		0.356	0.349	ABCB9,ABHD15,ABL1,ADAMTS7,ADIPOR2,AGO2,ALAS2,ALS2,AMACR,ANGPTL2,ANKS4B,AOX1,AQP9,ARNTL,ATP1B1,AVPR1A,BACE1,BANP,BCAR3,BLM,C1S,C6,CAMK2G,CASP8AP2,CBS/CBSL,CC2D2A,CDC42EP1,CDH17,CDKN1A,CFLAR,CNTROB,COL4A1,CPT1B,CRAT,CRY2,CYP4F8,DMXL2,DNAJB5,DOT1L,DYRK1B,EFTUD2,EHD3,EIF1AX,EIF2AK3,ELL2,ENPP2,ERC1,F11,FADS3,FAM20C,FBXW7,FCGR3A/FCGR3B,FGD5,FKBP4,FNIP2,FZD6,G6PC,GCH1,GCK,GEMIN5,GPR146,GPRIN3,GRHPR,GYS2…	186
Carbohydrate Metabolism,Molecular Transport,Small Molecule Biochemistry	concentration	Concentration of D-glucose	1.78e-05	0.00221		0.623	0.611	ADIPOR2,AQP9,ARNTL,ATP2A2,AVPR1A,CRY2,ENPP2,G6PC,GCK,HIF1A,Irs3,LPIN1,Mt1,NOS3,NR1H4,PPARD,PTPRN,SCD,SLC37A4	19
Cancer,Organismal Injury and Abnormalities	anogenital cancer	Anogenital cancer	1.84e-05	0.00226				ABCB9,ABHD15,ABL1,ADAMTS7,ADIPOR2,AGO2,ALS2,AMACR,ANGPTL2,ANKS4B,AOX1,AQP9,ARNTL,AVPR1A,BACE1,BANP,BCAR3,BLM,C1S,C6,CASP8AP2,CBS/CBSL,CC2D2A,CDC42EP1,CDH17,CDKN1A,CFLAR,CNTROB,COL4A1,CPT1B,CRAT,CRY2,CYP4F8,DMXL2,DNAJB5,DOT1L,DYRK1B,EFTUD2,EHD3,EIF1AX,EIF2AK3,ELL2,ENPP2,ERC1,F11,FADS3,FAM20C,FBXW7,FCGR3A/FCGR3B,FGD5,FKBP4,FNIP2,FZD6,G6PC,GCK,GEMIN5,GPR146,GPRIN3,GRHPR,GYS2,H2BC10,HBB,HDHD3,HEATR1,…	172
Connective Tissue Development and Function,Tissue Morphology	mass	Mass of adipose tissue	1.96e-05	0.00237				ADIPOR2,ANGPTL4,CDKN1A,ENPP2,IL1R1,LPIN1,Mt1,NR1H4,PPARD,PRKCI,SCD,SLC2A5	12
Organismal Injury and Abnormalities,Tissue Morphology	size	Size of lesion	2.05e-05	0.00245				BNIP3,CBS/CBSL,CDH17,CDKN1A,F11,FBXW7,HIF1A,HSPH1,IL1R1,KMT2C,MAPKAPK2,Mt1,NAMPT,NOS3,NOX4,NR1H4,PPARD,PRKCI,THBD,UNG	20
Cancer,Neurological Disease,Organismal Injury and Abnormalities	nervous system neoplasm	Nervous system neoplasm	2.2e-05	0.00259				ABL1,AFAP1L1,AOX1,ATP1B1,ATP2A2,BAG3,BANP,BMF,C6,CASP8AP2,CDKN1A,COL4A1,CYP4F8,DMXL2,DNAJB1,EIF2AK3,ENPP2,FBXW7,FCGR3A/FCGR3B,FGD5,FKBP4,GEMIN5,HIF1A,HLA-E,HSP90B1,IL1R1,KIF1B,KLF3,KMT2C,MERTK,MYCBP2,NCOR2,NDRG2,PAPOLA,PCDH12,PGK1,POU3F1,PPME1,SLC20A1,SLC37A4,SLCO2B1,SOX13,SPAG1,SPHK2,SRMS,ST8SIA1,THBD,TUBB2A,USP36,VTN	50
Organismal Injury and Abnormalities	edema	Edema	2.23e-05	0.00259		0.078	0.175	ABL1,AGO2,ANGPTL4,ATP2A2,C1S,CA14,CFLAR,CITED2,ENPP2,ERF,FBXW7,FZD6,HIF1A,NOS3,RAD51D,TFRC,TUBB2A,UBN1,VTN,Wasl	20
Cancer,Gastrointestinal Disease,Organismal Injury and Abnormalities	oral squamous cell carcinoma	Oral squamous cell carcinoma	2.28e-05	0.00261				ADAMTS7,ATP2A2,AVPR1A,CAMSAP2,CASP8AP2,CDC42EP1,CITED2,COL4A1,CYP4F8,DMXL2,DNAJB5,ENPP2,FBXW7,FZD6,GCH1,GEMIN5,GRHPR,HSP90B1,INPP5B,MAPKAPK2,MDN1,MYCBP2,MYO9B,NAA16,NDRG2,NR1H4,PAPOLA,PHLDB2,PRKCI,RBM14,SFPQ,SLC45A3,SLCO2B1,SPAG1,TEAD1,THBD,TRIM6-TRIM34,TUBB2A,URB1,USP34,WNK1	41
Cellular Function and Maintenance	homeostasis	Cellular homeostasis	2.43e-05	0.00275		-0.057	-0.141	ABL1,ADIPOR2,ALAS2,ANGPTL4,ARNTL,ATP1B1,ATP2A2,AVPR1A,BAG3,BLM,BMF,BNIP3,CDKN1A,CFLAR,COL4A1,CRY2,DNAJB1,EIF2AK3,ERC1,FBXW7,FCGR3A/FCGR3B,FZD5,G6PC,GADD45G,GCK,HIF1A,HSP90B1,IL1R1,KDM4A,LGALS9B,MERTK,Mt1,Mt1m/Mt2A,NAMPT,NCOR2,NFIL3,NOS3,NR1H4,NRBF2,PAPOLA,PPARD,PRKCI,Rorc,SCD,SLC20A2,SLC37A4,SLC39A10,SLC8B1,TFRC,TG,THBD,USP10,USP36,VAV2,VTN,Wasl,WNK1,ZBTB16	58
Carbohydrate Metabolism,Cellular Function and Maintenance,Small Molecule Biochemistry	homeostasis	Homeostasis of D-glucose	2.63e-05	0.00293				ADIPOR2,ANGPTL4,ARNTL,ATP2A2,CRY2,G6PC,GCK,HIF1A,NCOR2,NOS3,NR1H4,SCD,SLC37A4,SLC8B1	14
Cancer,Organismal Injury and Abnormalities	malignant genitourinary solid tumor	Malignant genitourinary solid tumor	2.9e-05	0.00319				ABCB9,ABHD15,ABL1,ADAMTS7,ADIPOR2,AGO2,ALAS2,ALS2,AMACR,ANGPTL2,ANKS4B,AOX1,AQP9,ARNTL,ATP1B1,AVPR1A,BACE1,BANP,BCAR3,BLM,C1S,C6,CAMK2G,CASP8AP2,CBS/CBSL,CC2D2A,CDC42EP1,CDH17,CDKN1A,CFLAR,CNTROB,COL4A1,CPT1B,CRAT,CRY2,CYP4F8,DMXL2,DNAJB5,DOT1L,DYRK1B,EFTUD2,EHD3,EIF1AX,EIF2AK3,ELL2,ENPP2,ERC1,F11,FADS3,FAM20C,FBXW7,FCGR3A/FCGR3B,FGD5,FKBP4,FNIP2,FZD6,G6PC,GCK,GEMIN5,GPR146,GPRIN3,GRHPR,GYS2,H2BC…	182
Cell Death and Survival	necrosis	Necrosis	2.99e-05	0.00324		1.899	1.945	ABL1,ACSM5,ADIPOR2,ALS2,AMACR,ATP2A2,BACE1,BAG3,BANP,BLM,BMF,BNIP3,CAMK2G,CAPRIN1,CASP8AP2,CBS/CBSL,CDKN1A,CFLAR,CITED2,COL4A1,DNAJB1,DOT1L,EIF1AX,EIF2AK3,ENPP2,F11,FBXW7,FCGR3A/FCGR3B,FKBP4,Fus,G6PC,GADD45G,GCH1,GCK,HDAC11,HIF1A,HSP90B1,HSPH1,IER3,IL1R1,IRX1,KIF1B,MAPKAPK2,MCM10,MDC1,MDN1,MED14,MERTK,Mt1,MTHFR,NAMPT,NCK1,NCOR2,NDRG2,NEDD9,NFIL3,NOS3,NOX4,NR1H4,PDE12,PIAS3,PPARD,PRKCI,RAD51D,Rorc…	85
Cellular Development,Cellular Growth and Proliferation,Hematological System Development and Function,Lymphoid Tissue Structure and Development	proliferation	Proliferation of lymphocytes	3.07e-05	0.00328		-0.17	-0.228	ABL1,AMACR,BLM,CBS/CBSL,CDKN1A,CFLAR,EHD3,FCGR3A/FCGR3B,Fus,GCH1,Hells/LOC100911660,HIF1A,HLA-E,HSP90B1,IL1R1,KLF3,LGALS9B,LPIN1,MERTK,NCK1,NCOR2,NFIL3,SLC39A10,SOX13,SPHK2,ST8SIA1,TFRC,TG,UNG,VAV2,Wasl,ZBTB16	32
Neurological Disease,Organismal Injury and Abnormalities	seizure disorder	Seizure disorder	3.1e-05	0.00328		-0.782	-0.711	ANGPTL4,BACE1,BAG3,CA14,CDKN1A,CITED2,DBP,DNAJB1,DNAJB5,ELL2,FCGR3A/FCGR3B,G6PC,GADD45G,HBB,HSP90B1,Mt1,NAMPT,NFIL3,NOS3,PTPRN,SLC37A4,SPAG1,ST8SIA1,TEF,YWHAG	25
Cancer,Gastrointestinal Disease,Hepatic System Disease,Organismal Injury and Abnormalities	liver tumor	Liver tumor	3.26e-05	0.00337		0.036	0.051	ABL1,ADIPOR2,AFAP1L1,AGO2,ALS2,ANKRD46,AOX1,ARNTL,ATP1B1,ATP2A2,BACE1,BANP,BLM,C1orf50,C1S,CAMK2G,CASP8AP2,CCS,CDH17,CDKN1A,CFLAR,CHORDC1,COL4A1,CPT1B,CYP4F8,DMXL2,DNAJB5,DNAJB9,DOT1L,EHD3,EIF1AX,ELL2,ENPP2,FAM20C,FBXW7,FGD5,FNIP2,FZD6,G6PC,GCH1,GCK,GPRIN3,GRHPR,GYS2,H2BC10,HBB,HEATR1,HIF1A,HLA-E,HSD17B2,HSP90B1,HSPH1,IDO2,IFFO1,INPP5B,INTS2,IPO7,IRX1,KIAA2026,KIF1B,KLF3,KMT2C,LSG1,MCMDC2,MDC1,MD…	135
Cardiovascular Disease	hypertension	Hypertension	3.27e-05	0.00337				ABL1,ANGPTL2,ARL8B,ATP2A2,C1S,CA14,CALCOCO1,CDH17,DBP,DNAJB9,EIF2AK3,GSS,HIF1A,IL1R1,KCNH1,MTHFR,NOS3,NOX4,OSBPL11,PCDH12,PDE12,PPARD,PRKCI,PRRG1,SLC39A10,TEF,THBD,THNSL1,VAV2,WNK1,ZBTB16	31
Cancer,Organismal Injury and Abnormalities	pelvic adenocarcinoma	Pelvic adenocarcinoma	3.34e-05	0.0034				ABCB9,ABHD15,ABL1,ADAMTS7,ADIPOR2,ALS2,ANKS4B,AOX1,AQP9,AVPR1A,BACE1,BANP,BCAR3,BLM,C1S,C6,CASP8AP2,CBS/CBSL,CC2D2A,CDC42EP1,CDH17,CDKN1A,CNTROB,COL4A1,CPT1B,CRAT,CRY2,CYP4F8,DMXL2,DNAJB5,DOT1L,DYRK1B,EFTUD2,EHD3,EIF1AX,EIF2AK3,ELL2,ENPP2,ERC1,F11,FADS3,FBXW7,FGD5,FNIP2,FZD6,G6PC,GCK,GEMIN5,GPR146,GPRIN3,H2BC10,HBB,HDHD3,HEATR1,HLA-E,HSP90B1,HSPH1,IDO2,INSC,INTS2,IRX1,KCNH1,KDM4A,KIAA2026,KMT2C,L…	137
Cancer,Organismal Injury and Abnormalities,Reproductive System Disease	female genital tract cancer	Female genital tract cancer	3.38e-05	0.0034				ABCB9,ABL1,ADAMTS7,ADIPOR2,ALS2,AOX1,AQP9,AVPR1A,BLM,C1S,C6,CBS/CBSL,CC2D2A,CDKN1A,CFLAR,COL4A1,CRY2,CYP4F8,DMXL2,DNAJB5,DOT1L,DYRK1B,EIF1AX,ELL2,ENPP2,F11,FADS3,FBXW7,FCGR3A/FCGR3B,FNIP2,FZD6,GEMIN5,GPR146,GRHPR,GYS2,H2BC10,HBB,HEATR1,HIF1A,HLA-E,HSP90B1,HSPH1,IDO2,IER3,IL1R1,INSC,IRX1,KDM4A,KIAA2026,KIF1B,KLF3,KMT2C,LGALS9B,LSG1,MAPKAPK2,MCM10,MDC1,MDN1,MED14,MICAL2,MYCBP2,MYO9B,NCOR2,NEDD9,NFI…	115
Cancer,Organismal Injury and Abnormalities	extrapulmonary squamous cell carcinoma	Extrapulmonary squamous cell carcinoma	3.61e-05	0.00359				ABHD15,ABL1,ACSM5,ADAMTS7,AGO2,ALS2,ANGPTL2,ANKRD33B,AOX1,ATP2A2,AVPR1A,BANP,C6,CAMSAP2,CASP8AP2,CDC42EP1,CDH17,CFLAR,CITED2,CNTROB,COL4A1,CYP4F8,CYP8B1,DMXL2,DNAJB5,EFTUD2,ENPP2,F11,FADS3,FBXW7,FZD6,GCH1,GCK,GEMIN5,GRHPR,GYS2,HBB,HEATR1,HSP90B1,IL1R1,INPP5B,KCNH1,KMT2C,LGALS9B,LOXL4,MAPKAPK2,MDN1,MTMR4,MYCBP2,MYO9B,NAA16,NCOR2,NDRG2,NEDD9,NR1D2,NR1H4,PAPOLA,PCDH12,PER3,PHLDB2,PIAS3,PNRC1,PRKCI,P…	88
Organ Morphology,Organismal Development,Organismal Injury and Abnormalities,Renal and Urological Disease,Renal and Urological System Development and Function	nephromegaly	Nephromegaly	3.74e-05	0.00368				EHD3,G6PC,HSD17B2,Mt1,NOS3,NOX4,SLC37A4	7
Cancer,Organismal Injury and Abnormalities	angiogenesis	Angiogenesis of tumor	3.86e-05	0.00375		0.64	0.608	ANGPTL2,ANGPTL4,BAG3,COL4A1,HIF1A,IRX1,MAPKAPK2,PRKCI,THBD,VAV2	10
Cancer,Organismal Injury and Abnormalities	development	Development of malignant tumor	4.08e-05	0.00387		0.765	0.798	ABCB9,ABL1,ADAMTS7,ADIPOR2,AFAP1L1,AGO2,ALAS2,ALG12,ALS2,AMACR,ANGPTL2,ANGPTL4,AOX1,AQP9,ARNTL,ATP2A2,AVPR1A,BACE1,BANP,BLM,BMF,C1S,C6,CA14,CAMSAP2,CAPRIN1,CASP8AP2,CBS/CBSL,CC2D2A,CCS,CDC42EP1,CDKN1A,CFLAR,CNTROB,COL4A1,CRAT,CRY2,CYP4F8,CYP8B1,DMXL2,DNAJB5,DOT1L,DYRK1B,EHD3,EIF1AX,ELL2,ENPP2,ERF,F11,FADS3,FBXW7,FCGR3A/FCGR3B,FGD5,FICD,FNIP2,FZD6,GEMIN5,GPR146,GPRIN3,GRHPR,GSS,GYS2,H2BC10,HBB,HEA…	181
Molecular Transport	transport	Transport of metal ion	4.08e-05	0.00387				ATP1B1,ATP2A2,CAMK2G,CCS,FKBP4,KCNH1,NDRG2,NIPAL1,NOS3,PPME1,SFXN1,SLC20A1,SLC38A3,SLC8B1,TFRC,TG,WNK1	17
Neurological Disease	motor dysfunction or movement disorder	Motor dysfunction or movement disorder	4.13e-05	0.00388		0.613	0.701	ABL1,ALAS2,ALS2,ARNTL,ATP1B1,ATP2A2,BACE1,BANP,CA14,CFLAR,CPT1B,DBP,DNAJB1,FAM20C,FBXW7,FCGR3A/FCGR3B,FKBP4,G6PC,GCH1,IER3,IL1R1,KIF1B,Klf16,KLF3,KMT2C,MERTK,NAB2,NDRG2,NOX4,PDE6C,PGK1,PIAS3,POU3F1,PPARD,RHOBTB3,SCD,ST8SIA1,STMN1,TOR1A,TUBB2A,USP36,WNK1,ZBTB16	43
Lipid Metabolism,Small Molecule Biochemistry	homeostasis	Homeostasis of lipid	4.41e-05	0.00409				ANGPTL4,ARNTL,CYP8B1,G6PC,GCK,MAT1A,Mt1,MTHFR,NR1D2,NR1H4,PPARD,SCD,SLC37A4	13
Carbohydrate Metabolism	quantity	Quantity of carbohydrate	5.11e-05	0.00469		0.345	0.316	ADIPOR2,AQP9,ARNTL,ATP2A2,AVPR1A,CRY2,DNAJB9,EIF2AK3,ENPP2,G6PC,GCK,HIF1A,INPP5B,Irs3,LPIN1,Mt1,NOS3,NR1H4,NRBF2,PLPP3,PPARD,PTPRN,SCD,SLC37A4,UGP2	25
Cell Death and Survival	apoptosis	Apoptosis	5.16e-05	0.00469	Increased	2.176	2.24	ABL1,ACSM5,AGO2,ALS2,ANGPTL4,BAG3,BANP,BLM,BMF,BNIP3,C6,CAMK2G,CAPRIN1,CASP8AP2,CBS/CBSL,CDKN1A,CFLAR,CITED2,COL4A1,DNAJB1,DOT1L,EHD3,EIF2AK3,ENPP2,ERC1,ERF,FBXW7,FCGR3A/FCGR3B,FKBP4,FNIP2,Fus,G6PC,GADD45G,GCK,HDAC11,Hells/LOC100911660,HIF1A,HSP90B1,HSPH1,IER3,IL1R1,Irs3,IRX1,KIF1B,MAPKAPK2,MCM10,MDC1,MDN1,MERTK,Mt1,NAA16,NAMPT,NCK1,NCOR2,NDRG2,NEDD9,NFIL3,NOS3,NOX4,NR1H4,PIAS3,POU3F1,PPARD,PRKCI…	84
Cancer,Neurological Disease,Organismal Injury and Abnormalities	high grade astrocytoma	High grade astrocytoma	5.3e-05	0.00476				ABL1,AOX1,ATP1B1,ATP2A2,BAG3,BMF,C6,CASP8AP2,CDKN1A,COL4A1,CYP4F8,DMXL2,DNAJB1,ENPP2,FBXW7,FGD5,HIF1A,HLA-E,HSP90B1,IL1R1,KLF3,KMT2C,MERTK,MYCBP2,NCOR2,PCDH12,POU3F1,SLC20A1,SLC37A4,SLCO2B1,SPAG1,ST8SIA1,TUBB2A,USP36,VTN	35
Cancer,Organismal Injury and Abnormalities	squamous-cell carcinoma	Squamous-cell carcinoma	5.96e-05	0.00513				ABHD15,ABL1,ACSM5,ADAMTS7,AGO2,ALS2,ANGPTL2,ANKRD33B,AOX1,ATP1B1,ATP2A2,AVPR1A,BANP,BLM,C6,CAMSAP2,CASP8AP2,CDC42EP1,CDH17,CDKN1A,CFLAR,CITED2,CNTROB,COL4A1,CYP4F8,CYP8B1,DMXL2,DNAJB5,EFTUD2,ENPP2,F11,FADS3,FBXW7,FZD6,GCH1,GCK,GEMIN5,GRHPR,GYS2,HBB,HEATR1,HSP90B1,IL1R1,INPP5B,KCNH1,KMT2C,LGALS9B,LOXL4,LSG1,MAPKAPK2,MDN1,MTMR4,MYCBP2,MYO9B,NAA16,NCOR2,NDRG2,NEDD9,NR1D2,NR1H4,PAPOLA,PCDH12,PER3,PHL…	93
Metabolic Disease,Organismal Injury and Abnormalities	metabolism	Abnormal metabolism	6.09e-05	0.00513		0.654	0.694	ADIPOR2,ANGPTL4,ARNTL,CCS,CDKN1A,GCK,HIF1A,HLA-E,IL1R1,Irs3,LPIN1,Mocs1,NOS3,NR1H4,PPARD,PPME1,SCD,SLC25A19,SLC37A4	19
Dermatological Diseases and Conditions,Organismal Injury and Abnormalities	psoriasis	Active stage psoriasis	6.09e-05	0.00513				AQP9,NAMPT,NFIL3,NR1D2	4
Cardiovascular Disease,Cardiovascular System Development and Function	abnormal morphology	Abnormal morphology of vascular plexus	6.09e-05	0.00513				FBXW7,FZD5,HIF1A,PLPP3	4
Cancer,Organismal Injury and Abnormalities,Reproductive System Disease	breast or gynecological cancer	Breast or gynecological cancer	6.12e-05	0.00513				ABCB9,ABL1,ADAMTS7,ADIPOR2,AGO2,ALS2,ANGPTL2,AOX1,AQP9,ARNTL,AVPR1A,BCAR3,BLM,C1S,C6,CBS/CBSL,CC2D2A,CDC42EP1,CDKN1A,CFLAR,COL4A1,CRAT,CRY2,CYP4F8,DMXL2,DNAJB5,DOT1L,DYRK1B,EFTUD2,EIF1AX,EIF2AK3,ELL2,ENPP2,ERC1,F11,FADS3,FBXW7,FCGR3A/FCGR3B,FGD5,FNIP2,FZD6,GCK,GEMIN5,GPR146,GRHPR,GYS2,H2BC10,HBB,HEATR1,HIF1A,HLA-E,HSP90B1,HSPH1,IDO2,IER3,IL1R1,INSC,IRX1,KDM4A,KIAA2026,KIF1B,KLF3,KMT2C,LGALS9B,LSG…	138
Neurological Disease	movement disorder	Movement Disorders	6.12e-05	0.00513		0.942	1.021	ABL1,ALAS2,ALS2,ARNTL,ATP1B1,ATP2A2,BACE1,BANP,CA14,CFLAR,CPT1B,DBP,DNAJB1,FBXW7,FCGR3A/FCGR3B,FKBP4,G6PC,GCH1,IER3,IL1R1,KIF1B,Klf16,KLF3,KMT2C,MERTK,NAB2,NDRG2,NOX4,PDE6C,PGK1,PIAS3,POU3F1,PPARD,RHOBTB3,SCD,ST8SIA1,STMN1,TOR1A,TUBB2A,USP36,WNK1,ZBTB16	42
Cancer,Organismal Injury and Abnormalities,Reproductive System Disease	female genital neoplasm	Female genital neoplasm	6.14e-05	0.00513				ABCB9,ABL1,ADAMTS7,ADIPOR2,ALS2,AOX1,AQP9,AVPR1A,BLM,C1S,C6,CBS/CBSL,CC2D2A,CDKN1A,CFLAR,COL4A1,CRY2,CYP4F8,DMXL2,DNAJB5,DOT1L,DYRK1B,EIF1AX,ELL2,ENPP2,F11,FADS3,FBXW7,FCGR3A/FCGR3B,FNIP2,FZD6,GEMIN5,GPR146,GRHPR,GYS2,H2BC10,HBB,HEATR1,HIF1A,HLA-E,HSP90B1,HSPH1,IDO2,IER3,IL1R1,INSC,IRX1,KDM4A,KIAA2026,KIF1B,KLF3,KMT2C,LGALS9B,LSG1,MAPKAPK2,MCM10,MDC1,MDN1,MED14,MICAL2,MYCBP2,MYO9B,NCOR2,NEDD9,NFI…	117
Gene Expression	transcription	Transcription of RNA	6.29e-05	0.0052		0.848	0.775	ABL1,AGO2,ARNTL,BANP,BLM,CALCOCO1,CDKN1A,CFLAR,CITED2,CRY2,DBP,DNAJB5,DOT1L,DYRK1B,ELL2,ERF,FBXW7,FNIP2,Fus,FZD5,GADD45G,HBB,HEATR1,HIF1A,HSPH1,IRX1,KDM4A,Klf16,KLF3,LPIN1,MAPKAPK2,MED14,NAB2,NAMPT,NCK1,NCOR2,NFIL3,NR1D2,NR1H4,NRBF2,PER3,PIAS3,POU3F1,PPARD,PRKCI,PTPRN,RBM14,RNGTT,Rorc,Rps6ka5,SFPQ,SLC20A1,TARBP1,TEAD1,TEF,TG,UBN1,VAV2,Wasl,WWC3,ZBTB16,Zbtb21	62
Organismal Injury and Abnormalities,Renal and Urological Disease	abnormality	Abnormality of renal cortex	6.38e-05	0.00523				CDKN1A,EHD3,HIF1A,Mt1,NOS3,PPARD,SLC2A9	7
Cancer,Neurological Disease,Organismal Injury and Abnormalities	astrocytoma	Astrocytoma	6.62e-05	0.00537				ABL1,AOX1,ATP1B1,ATP2A2,BAG3,BMF,C6,CASP8AP2,CDKN1A,COL4A1,CYP4F8,DMXL2,DNAJB1,ENPP2,FBXW7,FGD5,HIF1A,HLA-E,HSP90B1,IL1R1,KLF3,KMT2C,MERTK,MYCBP2,NCOR2,PCDH12,POU3F1,PPME1,SLC20A1,SLC37A4,SLCO2B1,SPAG1,ST8SIA1,TUBB2A,USP36,VTN	36
Cardiovascular Disease,Organismal Injury and Abnormalities	peripheral arterial disease	Advanced stage peripheral arterial disease	6.92e-05	0.00553				BAG3,CAMK2G,CHORDC1,DNAJB1,DNAJB4,DNAJB5,HBB,HSPH1,NEDD9,TRIM14	10
Cancer,Organismal Injury and Abnormalities	blue round small cell tumor	Blue round small cell tumor	6.95e-05	0.00553				ABL1,BLM,CDKN1A,DOT1L,EFTUD2,EIF2AK3,FAM20C,FCGR3A/FCGR3B,GRHPR,HSP90B1,KIF1B,KLF3,KMT2C,LPIN1,MDC1,MERTK,MYCBP2,NDRG2,NOTUM,PGK1,PNRC1,PRKCI,RAD51D,TG,TUBB2A,USP34	26
Cancer,Gastrointestinal Disease,Organismal Injury and Abnormalities	upper gastrointestinal tract cancer	Upper gastrointestinal tract cancer	7.01e-05	0.00553				ABL1,ADAMTS7,ADIPOR2,AFAP1L1,AGO2,ALS2,AOX1,ARNTL,ATP2A2,AVPR1A,C6,CAMSAP2,CASP8AP2,CBS/CBSL,CDC42EP1,CDKN1A,CFLAR,CITED2,CNTROB,COL4A1,CYP4F8,DMXL2,DNAJB5,DOT1L,EHD3,EIF2AK3,ENPP2,ERF,F11,FBXW7,FGD5,FZD6,GCH1,GEMIN5,GRHPR,GSS,HEATR1,HLA-E,HSP90B1,INPP5B,INSC,INTS2,KCNH1,KLF3,KMT2C,MAPKAPK2,MDN1,MICAL2,MTHFR,MYCBP2,MYO9B,NAA16,NCOR2,NDRG2,NEDD9,NR1H4,PAPOLA,PER3,PHLDB2,PNRC1,POU3F1,PPARD,PRKCI,RB…	85
Cellular Growth and Proliferation,Lymphoid Tissue Structure and Development	proliferation	Proliferation of lymphatic system cells	7.15e-05	0.00557		-0.155	-0.22	ABL1,AMACR,BLM,CBS/CBSL,CDKN1A,CFLAR,EHD3,FCGR3A/FCGR3B,Fus,GCH1,Hells/LOC100911660,HIF1A,HLA-E,HSP90B1,IL1R1,KLF3,LGALS9B,LPIN1,MERTK,NCK1,NCOR2,NFIL3,SLC39A10,SOX13,SPHK2,ST8SIA1,TFRC,TG,UNG,VAV2,Wasl,YWHAG,ZBTB16	33
Carbohydrate Metabolism	gluconeogenesis	Gluconeogenesis	7.24e-05	0.00557		0.152	0.149	ADIPOR2,ARNTL,G6PC,GCK,HIF1A,PGK1,SCD,SLC25A10,SLC37A4	9
Cellular Compromise	stress response	Stress response of cells	7.27e-05	0.00557		0.107	0.1	ATP2A2,BNIP3,CDKN1A,DNAJB9,EIF2AK3,HIF1A,HSP90B1,Mt1,NAMPT,NDRG2	10
Cancer,Organismal Injury and Abnormalities	malignant neoplasm of aerodigestive tract	Malignant neoplasm of aerodigestive tract	7.34e-05	0.00557				ABL1,ADAMTS7,ADIPOR2,AGO2,AOX1,ATP2A2,AVPR1A,CAMSAP2,CASP8AP2,CDC42EP1,CDKN1A,CITED2,CNTROB,COL4A1,CYP4F8,DMXL2,DNAJB5,DOT1L,EIF2AK3,ENPP2,F11,FBXW7,FGD5,FZD6,GCH1,GEMIN5,GRHPR,GSS,HEATR1,HSP90B1,INPP5B,INSC,KCNH1,KMT2C,MAPKAPK2,MDN1,MYCBP2,MYO9B,NAA16,NCOR2,NDRG2,NR1H4,PAPOLA,PCDH12,PHLDB2,POU3F1,PRKCI,RBM14,SEPTIN11,SFPQ,SLC45A3,SLCO2B1,SPAG1,SUCO,TEAD1,TECPR2,TG,THBD,TRIM6-TRIM34,TUBB2A,UAP1,U…	67
Cell Death and Survival	survival	Cell survival	7.55e-05	0.00568		-0.847	-1.011	ABL1,AGO2,ALS2,BAG3,BLM,BNIP3,CAMK2G,CDKN1A,CFLAR,DOT1L,DYRK1B,EFTUD2,EIF2AK3,FCGR3A/FCGR3B,FKBP4,GCH1,HBB,HEATR1,HIF1A,HSP90B1,HSPH1,IER3,INPP5B,Irs3,KIF1B,MAPKAPK2,MDC1,MED14,MERTK,MICAL2,Mt1,MTHFR,NAMPT,NCK1,NDRG2,NEDD9,NFIL3,NOS3,NOX4,NR1H4,PPARD,PRKCI,PTPRN,RAD51D,SCD,SLC37A4,STMN1,THBD,UNG,USP10,USP36,VTN,ZBTB16	53
Cancer,Organismal Injury and Abnormalities,Renal and Urological Disease	neoplasia	Renal tumor	7.8e-05	0.00582		0	0.007	ABL1,ALAS2,AMACR,AOX1,AQP9,BLM,C1S,CBS/CBSL,CDC42EP1,CDKN1A,CFLAR,EHD3,FBXW7,FNIP2,FZD6,GRHPR,HBB,HIF1A,HSP90B1,IL1R1,KIF1B,KLF3,KMT2C,LGALS9B,MDN1,MED14,MERTK,MICAL2,Mt1,MYCBP2,NCOR2,PDHB,PIAS3,POU3F1,RBM14,SCD,SLC20A2,SLC2A9,THBD,TMEM51,TOR1A,TSKU,TUBB2A,USP34	44
Cancer,Organismal Injury and Abnormalities	lymphoid cancer	Lymphoid cancer	8.16e-05	0.00603		-0.626	-0.597	ABL1,AFAP1L1,AMACR,ATP1B1,BLM,BMF,CDKN1A,CFLAR,CITED2,COL4A1,DMXL2,EIF2AK3,ERC1,FBXW7,FCGR3A/FCGR3B,GADD45G,GRHPR,HDAC11,HIF1A,HLA-E,HSP90B1,HSPH1,IER3,INSC,IPO7,KLF3,KMT2C,LGALS9B,LPIN1,MERTK,MTHFR,MTMR4,NAA16,NAMPT,NCOR2,NDRG2,NEDD9,PLEKHG6,PLPP3,PNRC1,POU3F1,PRKCI,RBM14,RHOBTB3,RND2,SFXN1,SRMS,STMN1,TFRC,THBD,TMEM268,TSPAN12,TUBB2A,UBN1,UNG,USP10,USP34,VAV2,VTN,WDR91,WWC3,ZBTB16	62
Cancer,Organismal Injury and Abnormalities	lymphohematopoietic neoplasia	Lymphohematopoietic neoplasia	8.69e-05	0.00635		0.097	0.109	ABL1,ADAMTS7,AFAP1L1,AMACR,ANGPTL2,ANGPTL4,AOX1,ARNTL,ATP1B1,BLM,BMF,C6,CAMK2G,CASP8AP2,CC2D2A,CDKN1A,CFLAR,CHORDC1,CITED2,COL4A1,CPT1B,CRAT,DMXL2,DOT1L,EIF2AK3,ENPP2,ERC1,FBXW7,FCGR3A/FCGR3B,GADD45G,GRHPR,HDAC11,HDHD3,HEATR1,HIF1A,HLA-E,HPS4,HSP90B1,HSPH1,IER3,IL1R1,INSC,IPO7,KCNH1,KIAA2026,KIF1B,KLF3,KMT2C,LGALS9B,LPIN1,MAB21L3,MDC1,MDN1,MERTK,MTHFR,MTMR4,NAA16,NAMPT,NCOR2,NDRG2,NEDD9,NHSL1,NOX…	92
Cancer,Organismal Injury and Abnormalities	lymphohematopoietic cancer	Lymphohematopoietic cancer	8.75e-05	0.00635		-0.154	-0.136	ABL1,ADAMTS7,AFAP1L1,AMACR,ANGPTL2,ANGPTL4,AOX1,ARNTL,ATP1B1,BLM,BMF,C6,CAMK2G,CASP8AP2,CC2D2A,CDKN1A,CFLAR,CITED2,COL4A1,CPT1B,CRAT,DMXL2,DOT1L,EIF2AK3,ENPP2,ERC1,FBXW7,FCGR3A/FCGR3B,GADD45G,GRHPR,HDAC11,HDHD3,HEATR1,HIF1A,HLA-E,HPS4,HSP90B1,HSPH1,IER3,IL1R1,INSC,IPO7,KCNH1,KIAA2026,KIF1B,KLF3,KMT2C,LGALS9B,LPIN1,MAB21L3,MDC1,MDN1,MERTK,MTHFR,MTMR4,NAA16,NAMPT,NCOR2,NDRG2,NEDD9,NHSL1,NOX4,PER3,P…	91
Cardiovascular Disease,Neurological Disease,Organismal Injury and Abnormalities,Psychological Disorders	ischemic injury	Ischemic injury of brain	8.93e-05	0.00641		0.555	0.568	F11,HSPH1,NOS3,NOX4,UNG	5
Developmental Disorder,Tissue Morphology	abnormal morphology	Abnormal morphology of extraembryonic tissue	8.98e-05	0.00641				AGO2,ENPP2,ERF,FBXW7,FZD5,HSP90B1,PLPP3,PPARD,PRKCI,SLC25A19,TEAD1,Wasl	12
Cancer,Organismal Injury and Abnormalities,Reproductive System Disease	tumorigenesis	Tumorigenesis of reproductive tract	9.16e-05	0.00648				ABCB9,ABL1,ADAMTS7,ADIPOR2,ALS2,AOX1,AQP9,AVPR1A,BLM,C1S,C6,CBS/CBSL,CC2D2A,CDKN1A,CFLAR,COL4A1,CRY2,CYP4F8,DMXL2,DNAJB5,DOT1L,DYRK1B,EIF1AX,ELL2,ENPP2,F11,FADS3,FBXW7,FNIP2,FZD6,GEMIN5,GPR146,GRHPR,GYS2,H2BC10,HBB,HEATR1,HIF1A,HLA-E,HSP90B1,HSPH1,IDO2,IER3,IL1R1,INSC,IRX1,KDM4A,KIAA2026,KIF1B,KLF3,KMT2C,LGALS9B,LSG1,MAPKAPK2,MCM10,MDC1,MDN1,MED14,MICAL2,MYCBP2,MYO9B,NCOR2,NEDD9,NFIL3,NHSL1,NRBF2…	116
Cancer,Organismal Injury and Abnormalities,Renal and Urological Disease	renal cancer	Renal cancer	9.24e-05	0.00648				ABL1,ALAS2,AMACR,AOX1,AQP9,BLM,C1S,CBS/CBSL,CDC42EP1,CDKN1A,CFLAR,EHD3,FBXW7,FZD6,GRHPR,HBB,HIF1A,HSP90B1,IL1R1,KIF1B,KLF3,KMT2C,LGALS9B,MDN1,MED14,MERTK,MICAL2,Mt1,MYCBP2,NCOR2,PDHB,PIAS3,POU3F1,RBM14,SCD,SLC20A2,SLC2A9,THBD,TMEM51,TOR1A,TSKU,TUBB2A,USP34	43
Connective Tissue Development and Function,Tissue Morphology	quantity	Quantity of connective tissue	9.74e-05	0.00678		-1.344	-1.392	ABL1,AMACR,ANGPTL2,ANGPTL4,ARNTL,BAG3,BLM,CDKN1A,CRY2,EIF2AK3,F11,FBXW7,HBB,IL1R1,Irs3,KLF3,Mt1,NAB2,NFIL3,NOS3,NR1H4,PPARD,SCD,SLC20A1,TFRC,Wasl	26
Cancer,Organismal Injury and Abnormalities	cancer of head	Cancer of head	9.87e-05	0.00682				ABL1,ADAMTS7,ATP2A2,AVPR1A,CAMSAP2,CASP8AP2,CDC42EP1,CDKN1A,CITED2,COL4A1,CYP4F8,DMXL2,DNAJB5,ENPP2,FBXW7,FZD6,GCH1,GEMIN5,GRHPR,HSP90B1,INPP5B,KMT2C,MAPKAPK2,MDN1,MYCBP2,MYO9B,NAA16,NDRG2,NR1H4,PAPOLA,PHLDB2,PRKCI,RBM14,SFPQ,SLC45A3,SLCO2B1,SPAG1,SRMS,TEAD1,THBD,TRIM6-TRIM34,TUBB2A,URB1,USP34,WNK1	45
Cancer,Neurological Disease,Organismal Injury and Abnormalities	central nervous system solid tumor	Central nervous system solid tumor	0.000101	0.0069				ABL1,AFAP1L1,AOX1,ATP1B1,ATP2A2,BAG3,BANP,BMF,C6,CASP8AP2,CDKN1A,COL4A1,CYP4F8,DMXL2,DNAJB1,EIF2AK3,ENPP2,FBXW7,FGD5,GEMIN5,HIF1A,HLA-E,HSP90B1,IL1R1,KLF3,KMT2C,MERTK,MYCBP2,NCOR2,NDRG2,PAPOLA,PCDH12,POU3F1,PPME1,SLC20A1,SLC37A4,SLCO2B1,SOX13,SPAG1,SPHK2,SRMS,ST8SIA1,THBD,TUBB2A,USP36,VTN	46
Cancer,Gastrointestinal Disease,Organismal Injury and Abnormalities	upper gastrointestinal carcinoma	Upper gastrointestinal carcinoma	0.000107	0.00725				ABL1,ADAMTS7,ADIPOR2,AFAP1L1,AGO2,ALS2,AOX1,ARNTL,ATP2A2,AVPR1A,C6,CAMSAP2,CASP8AP2,CBS/CBSL,CDC42EP1,CFLAR,CITED2,CNTROB,COL4A1,CYP4F8,DMXL2,DNAJB5,DOT1L,EHD3,ENPP2,ERF,F11,FBXW7,FGD5,FZD6,GCH1,GEMIN5,GRHPR,GSS,HEATR1,HLA-E,HSP90B1,INPP5B,INSC,INTS2,KCNH1,KLF3,KMT2C,MAPKAPK2,MDN1,MICAL2,MTHFR,MYCBP2,MYO9B,NAA16,NCOR2,NDRG2,NEDD9,NR1H4,PAPOLA,PER3,PHLDB2,POU3F1,PPARD,PRKCI,RBM14,RHOBTB3,SFPQ,SLC3…	81
Connective Tissue Disorders,Inflammatory Disease,Inflammatory Response,Organismal Injury and Abnormalities,Skeletal and Muscular Disorders	inflammation	Inflammation of joint	0.000108	0.00725		0.046	0.03	ABL1,ADAMTS7,ALAS2,AQP9,ATP1B1,C6,CDKN1A,CRY2,ENPP2,FCGR3A/FCGR3B,FZD5,HBB,HIF1A,HLA-E,HSP90B1,IL1R1,KLF3,LGALS9B,LPIN1,MAPKAPK2,MDC1,MERTK,MTHFR,MYCBP2,NAA16,NAMPT,NOS3,PGK1,PIAS3,PPARD,RHOBTB3,SLC2A9,SPHK2,TFRC,TMEM51,TUBB2A,UBE2G2,WNK1	38
Cancer,Hematological Disease,Immunological Disease,Organismal Injury and Abnormalities	lymphocytic cancer	Lymphocytic cancer	0.000109	0.00726		-0.626	-0.592	ABL1,AFAP1L1,AMACR,ATP1B1,BLM,BMF,CDKN1A,CFLAR,CITED2,COL4A1,DMXL2,EIF2AK3,ERC1,FBXW7,FCGR3A/FCGR3B,GADD45G,GRHPR,HDAC11,HIF1A,HSP90B1,HSPH1,IER3,INSC,IPO7,KLF3,KMT2C,LGALS9B,LPIN1,MERTK,MTHFR,MTMR4,NAA16,NAMPT,NCOR2,NDRG2,NEDD9,PLEKHG6,PLPP3,PNRC1,POU3F1,PRKCI,RBM14,RHOBTB3,RND2,SFXN1,SRMS,STMN1,TFRC,THBD,TMEM268,TSPAN12,TUBB2A,UBN1,UNG,USP10,USP34,VAV2,VTN,WDR91,WWC3,ZBTB16	61
Cancer,Neurological Disease,Organismal Injury and Abnormalities	glioma formation	Glioma	0.00011	0.00726				ABL1,AOX1,ATP1B1,ATP2A2,BAG3,BANP,BMF,C6,CASP8AP2,CDKN1A,COL4A1,CYP4F8,DMXL2,DNAJB1,EIF2AK3,ENPP2,FBXW7,FGD5,HIF1A,HLA-E,HSP90B1,IL1R1,KLF3,KMT2C,MERTK,MYCBP2,NCOR2,PAPOLA,PCDH12,POU3F1,PPME1,SLC20A1,SLC37A4,SLCO2B1,SOX13,SPAG1,SPHK2,ST8SIA1,TUBB2A,USP36,VTN	41
Cancer,Organismal Injury and Abnormalities	development	Development of carcinoma	0.000112	0.00731		1.138	1.168	ABCB9,ABL1,ADAMTS7,ADIPOR2,AFAP1L1,AGO2,ALAS2,ALG12,ALS2,AMACR,ANGPTL2,ANGPTL4,AOX1,AQP9,ARNTL,ATP2A2,AVPR1A,BACE1,BANP,BLM,C1S,C6,CA14,CAMSAP2,CAPRIN1,CASP8AP2,CBS/CBSL,CC2D2A,CCS,CDC42EP1,CDKN1A,CFLAR,CNTROB,COL4A1,CRAT,CRY2,CYP4F8,CYP8B1,DMXL2,DNAJB5,DOT1L,DYRK1B,EHD3,EIF1AX,ELL2,ENPP2,ERF,F11,FADS3,FBXW7,FGD5,FICD,FNIP2,FZD6,GEMIN5,GPR146,GPRIN3,GRHPR,GSS,GYS2,H2BC10,HBB,HEATR1,HIF1A,HLA-E,HP…	177
Developmental Disorder,Embryonic Development,Organismal Development,Tissue Morphology	abnormal morphology	Abnormal morphology of neural tube	0.000112	0.00731				AGO2,ENPP2,PLPP3,SLC25A19,TFRC,Wasl	6
Cancer,Hematological Disease,Organismal Injury and Abnormalities	lymphocytic neoplasm	Lymphocytic neoplasm	0.000114	0.00737		-0.626	-0.592	ABL1,AFAP1L1,AMACR,ATP1B1,BLM,BMF,CDKN1A,CFLAR,CITED2,COL4A1,DMXL2,EIF2AK3,ERC1,FBXW7,FCGR3A/FCGR3B,GADD45G,GRHPR,HDAC11,HIF1A,HSP90B1,HSPH1,IER3,INSC,IPO7,KLF3,KMT2C,LGALS9B,LPIN1,MERTK,MTHFR,MTMR4,NAA16,NAMPT,NCOR2,NDRG2,NEDD9,PLEKHG6,PLPP3,PNRC1,POU3F1,PRKCI,RBM14,RHOBTB3,RND2,SFXN1,SRMS,STMN1,TFRC,THBD,TMEM268,TSPAN12,TUBB2A,UBN1,UNG,USP10,USP34,VAV2,VTN,WDR91,WWC3,ZBTB16	61
Cancer,Neurological Disease,Organismal Injury and Abnormalities	glioma cancer	Glioma cancer	0.000117	0.0075				ABL1,AOX1,ATP1B1,ATP2A2,BAG3,BMF,C6,CASP8AP2,CDKN1A,COL4A1,CYP4F8,DMXL2,DNAJB1,ENPP2,FBXW7,FGD5,HIF1A,HLA-E,HSP90B1,IL1R1,KLF3,KMT2C,MERTK,MYCBP2,NCOR2,PAPOLA,PCDH12,POU3F1,SLC20A1,SLC37A4,SLCO2B1,SPAG1,ST8SIA1,TUBB2A,USP36,VTN	36
Cancer,Hematological Disease,Organismal Injury and Abnormalities	hematologic cancer	Hematologic cancer	0.000118	0.0075		-0.154	-0.133	ABL1,ADAMTS7,AFAP1L1,AMACR,ANGPTL2,ANGPTL4,AOX1,ARNTL,ATP1B1,BLM,BMF,C6,CAMK2G,CASP8AP2,CC2D2A,CDKN1A,CFLAR,CITED2,COL4A1,CPT1B,CRAT,DMXL2,DOT1L,EIF2AK3,ENPP2,ERC1,FBXW7,FCGR3A/FCGR3B,GADD45G,GRHPR,HDAC11,HDHD3,HEATR1,HIF1A,HPS4,HSP90B1,HSPH1,IER3,IL1R1,INSC,IPO7,KCNH1,KIAA2026,KIF1B,KLF3,KMT2C,LGALS9B,LPIN1,MAB21L3,MDC1,MDN1,MERTK,MTHFR,MTMR4,NAA16,NAMPT,NCOR2,NDRG2,NEDD9,NHSL1,NOX4,PER3,PLEKHG6…	90
Cardiovascular Disease,Hematological Disease,Organismal Injury and Abnormalities	anemia	Anemia	0.00012	0.0075		0.699	0.803	AGO2,ALAS2,ATP1B1,BLM,C1S,DOT1L,ERF,FBXW7,FCGR3A/FCGR3B,GRHPR,GSS,HBB,HIF1A,KMT2C,MERTK,POU3F1,SLC20A1,SLC25A19,TFRC,THBD,TUBB2A	21
Neurological Disease,Organismal Injury and Abnormalities	epilepsy	Epilepsy	0.00012	0.0075				ANGPTL4,BAG3,CA14,CDKN1A,CITED2,DBP,DNAJB1,DNAJB5,ELL2,FCGR3A/FCGR3B,GADD45G,HBB,HSP90B1,NAMPT,NFIL3,SPAG1,TEF,YWHAG	18
Cancer,Hematological Disease,Organismal Injury and Abnormalities	hematological neoplasia	Hematopoietic neoplasm	0.00012	0.0075		0.097	0.112	ABL1,ADAMTS7,AFAP1L1,AMACR,ANGPTL2,ANGPTL4,AOX1,ARNTL,ATP1B1,BLM,BMF,C6,CAMK2G,CASP8AP2,CC2D2A,CDKN1A,CFLAR,CHORDC1,CITED2,COL4A1,CPT1B,CRAT,DMXL2,DOT1L,EIF2AK3,ENPP2,ERC1,FBXW7,FCGR3A/FCGR3B,GADD45G,GRHPR,HDAC11,HDHD3,HEATR1,HIF1A,HPS4,HSP90B1,HSPH1,IER3,IL1R1,INSC,IPO7,KCNH1,KIAA2026,KIF1B,KLF3,KMT2C,LGALS9B,LPIN1,MAB21L3,MDC1,MDN1,MERTK,MTHFR,MTMR4,NAA16,NAMPT,NCOR2,NDRG2,NEDD9,NHSL1,NOX4,PER3…	91
Cancer,Hematological Disease,Immunological Disease,Organismal Injury and Abnormalities	neoplasia	Neoplasia of leukocytes	0.000125	0.00776		-0.512	-0.478	ABL1,AFAP1L1,AMACR,ATP1B1,BLM,BMF,CDKN1A,CFLAR,CITED2,COL4A1,DMXL2,EIF2AK3,ERC1,FBXW7,FCGR3A/FCGR3B,GADD45G,GRHPR,HDAC11,HIF1A,HSP90B1,HSPH1,IER3,INSC,IPO7,KLF3,KMT2C,LGALS9B,LPIN1,MERTK,MTHFR,MTMR4,NAA16,NAMPT,NCOR2,NDRG2,NEDD9,PLEKHG6,PLPP3,PNRC1,POU3F1,PRKCI,RBM14,RHOBTB3,RND2,SFXN1,SRMS,STMN1,TFRC,THBD,TMEM268,TSPAN12,TUBB2A,UBN1,UNG,USP10,USP34,VAV2,VTN,WDR91,WWC3,ZBTB16	61
Cardiovascular System Development and Function,Organismal Development	angiogenesis	Angiogenesis	0.000145	0.00889		0.46	0.384	ADIPOR2,AGO2,ANGPTL2,ANGPTL4,ARNTL,BACE1,C6,CBS/CBSL,CDKN1A,CITED2,COL4A1,EHD3,EIF2AK3,ENPP2,F11,FBXW7,FZD5,HIF1A,IRX1,MAPKAPK2,MERTK,MTHFR,MYO9B,NAB2,NCK1,NOS3,NOX4,PGK1,PLPP3,PPARD,SPHK2,THBD,TSPAN12,VAV2,VTN,WNK1,YWHAG	37
Neurological Disease,Organismal Injury and Abnormalities	epileptic seizure	Epileptic seizure	0.000147	0.00891				ANGPTL4,BAG3,CDKN1A,CITED2,DNAJB1,DNAJB5,ELL2,FCGR3A/FCGR3B,GADD45G,HBB,NAMPT,NFIL3	12
Molecular Transport	transport	Transport of ion	0.000147	0.00891		1.039	0.972	AQP9,ATP1B1,ATP2A2,CA14,CAMK2G,CCS,FKBP4,HBB,KCNH1,NDRG2,NIPAL1,NOS3,PPME1,SFXN1,SLC20A1,SLC20A2,SLC25A10,SLC38A3,SLC8B1,SLCO2B1,TFRC,TG,WNK1	23
Cardiovascular Disease,Organismal Injury and Abnormalities,Reproductive System Disease	preeclampsia	Preeclampsia	0.000152	0.0091				ANGPTL2,ARL8B,ATP2A2,C1S,CALCOCO1,CDH17,DBP,DNAJB9,EIF2AK3,IL1R1,KCNH1,NOS3,NOX4,OSBPL11,PCDH12,PDE12,PRRG1,SLC39A10,TEF,THNSL1,ZBTB16	21
Inflammatory Response	inflammation	Inflammation of absolute anatomical region	0.000153	0.0091		-0.583	-0.52	ABL1,ADIPOR2,AGO2,AMACR,ATP1B1,BLM,BMF,C6,CA14,CAMK2G,CBS/CBSL,CDKN1A,COL4A1,EHD3,EIF2AK3,F11,FCGR3A/FCGR3B,GADD45G,GCH1,GSS,HIF1A,HLA-E,HSP90B1,IL1R1,KLF3,KMT2C,LGALS9B,LPIN1,MAPKAPK2,MAT1A,MERTK,Mt1,MTHFR,NCOR2,NFIL3,NOS3,NR1H4,POU3F1,PPARD,PTPRN,SCD,SLC2A9,TFRC	43
Organismal Injury and Abnormalities	fibrosis	Fibrosis	0.000155	0.0092		0.237	0.265	ABL1,AGO2,ATP1B1,ATP2A2,CBS/CBSL,CC2D2A,CFLAR,ENPP2,F11,GSS,HBB,HIF1A,HPS4,IL1R1,MAPKAPK2,Mt1,NAMPT,NOS3,NOX4,NR1H4,SCD,SLC2A9,STMN1,TEAD1,VAV2,VTN	26
Cancer,Gastrointestinal Disease,Hepatic System Disease,Organismal Injury and Abnormalities	bile duct carcinoma	Bile duct carcinoma	0.000161	0.00946				ABL1,C1S,EIF2AK3,FAM20C,FBXW7,HLA-E,HSP90B1,IRX1,KCNH1,KMT2C,LGALS9B,MED14,MYCBP2,NCOR2,PAPOLA,PCDH12,PGK1,SLC16A11,SLC20A1,ST8SIA1,TARBP1,TG,TSPAN12,TUBB2A,USP34,VILL	26
Cancer,Organismal Injury and Abnormalities	melanoma	Melanoma	0.000162	0.00948				ABL1,ACSM5,ADAM11,ADAMTS7,ADIPOR2,AFAP1L1,ALAS2,ALG12,AMACR,ANKRD13C,ANKRD33B,ANKRD46,ANKS4B,AOX1,AQP9,ARNTL,ATP1B1,ATP2A2,AVPR1A,BAG3,BCAR3,BLM,BMF,C1S,C6,CALCOCO1,CAMK2G,CAMSAP2,CAPRIN1,CASP8AP2,CC2D2A,CCS,CDC42EP1,CDH17,CHORDC1,CNN3,CNTROB,COL4A1,CRY2,CYP4F8,CYP8B1,DMXL2,DNAJB1,DNAJB5,DOT1L,EEPD1,EFTUD2,EHD3,EIF1AX,EIF2AK3,ELL2,ENPP2,ENTPD8,ERC1,F11,FADS3,FAM20C,FBXW7,FCGR3A/FCGR3B,FGD5,FKBP4,…	174
Molecular Transport	transport	Transport of heavy metal	0.00017	0.00987		-0.728	-0.732	ALAS2,CCS,FKBP4,GCH1,HIF1A,Mt1,Mt1m/Mt2A,NEDD9,SLC39A10,TFRC	10
Carbohydrate Metabolism,Small Molecule Biochemistry	hydrolysis	Hydrolysis of glucose-6-phosphate	0.000172	0.00993				G6PC,SLC37A4	2
Organ Morphology,Organismal Development	mass	Mass of genitourinary system	0.000176	0.01				ANGPTL4,ARNTL,BAG3,BLM,CBS/CBSL,CDKN1A,EHD3,FKBP4,G6PC,HSD17B2,IL1R1,Mt1,NOS3,NR1H4,PPARD,SLC2A5	16
Cancer,Organismal Injury and Abnormalities	incidence	Incidence of tumor	0.000177	0.01		0.867	0.902	ABCB9,ABL1,ADAMTS7,ADIPOR2,AFAP1L1,AGO2,ALAS2,ALG12,ALS2,AMACR,ANGPTL2,ANGPTL4,AOX1,AQP9,ARNTL,ATP2A2,AVPR1A,BACE1,BANP,BLM,BMF,C1S,C6,CA14,CAMK2G,CAMSAP2,CAPRIN1,CASP8AP2,CBS/CBSL,CC2D2A,CCS,CDC42EP1,CDKN1A,CFLAR,CNTROB,COL4A1,CRAT,CRY2,CYP4F8,CYP8B1,DMXL2,DNAJB5,DOT1L,DYRK1B,EHD3,EIF1AX,ELL2,ENPP2,ERF,F11,FADS3,FBXW7,FCGR3A/FCGR3B,FGD5,FICD,FNIP2,FZD6,GEMIN5,GPR146,GPRIN3,GRHPR,GSS,GYS2,H2BC10,…	185
Developmental Disorder,Gastrointestinal Disease,Hepatic System Disease,Hereditary Disorder,Metabolic Disease,Organismal Injury and Abnormalities	glycogen storage disease, hepatic form	Glycogen storage disease, hepatic form	0.000178	0.01				G6PC,GYS2,SLC37A4	3
Amino Acid Metabolism,Small Molecule Biochemistry	metabolism	Metabolism of homocysteine	0.000178	0.01				CBS/CBSL,MTHFR,NOX4	3
Organismal Injury and Abnormalities	visceromegaly	Visceromegaly	0.000181	0.01				ABL1,AGO2,AMACR,ATP2A2,BAG3,BMF,BNIP3,CBS/CBSL,CDKN1A,CFLAR,DOT1L,EHD3,F11,G6PC,HIF1A,HSD17B2,IER3,IL1R1,MERTK,Mt1,NOS3,NOX4,NR1H4,PGK1,PPARD,PRKCI,SLC37A4,SLCO2B1,TG,UNG,VAV2	31
Carbohydrate Metabolism,Molecular Transport	quantity	Quantity of glycogen	0.000181	0.01		-0.78	-0.808	DNAJB9,EIF2AK3,G6PC,GCK,NR1H4,PPARD,SCD,SLC37A4	8
Connective Tissue Disorders,Inflammatory Disease,Organismal Injury and Abnormalities,Skeletal and Muscular Disorders	rheumatic disease	Rheumatic Disease	0.000184	0.0101		-0.203	-0.213	ABL1,ADAMTS7,ALAS2,AQP9,ATP1B1,C1S,C6,CDKN1A,CFLAR,CRY2,ENPP2,FCGR3A/FCGR3B,FZD5,GADD45G,GSS,HBB,HIF1A,HLA-E,HSP90B1,IL1R1,KLF3,LGALS9B,LPIN1,MAPKAPK2,MDC1,MERTK,MTHFR,MYCBP2,NAA16,NAMPT,NCOR2,NOS3,PGK1,PIAS3,PPARD,RHOBTB3,SLC2A9,SPHK2,STMN1,TFRC,TMEM51,TUBB2A,UBE2G2,VTN,WNK1	45
Lipid Metabolism,Small Molecule Biochemistry	metabolism	Fatty acid metabolism	0.000186	0.0101		-1.128	-1.229	ADIPOR2,ANGPTL4,AQP9,AVPR1A,CAMK2G,CPT1B,CRAT,CYP4F8,DBP,EIF2AK3,HBB,HIF1A,LPIN1,MAPKAPK2,NR1H4,PDHB,PPARD,PRKCI,SCD,SLC25A10,SLC45A3,SPHK2,ST8SIA1,TEF,VTN	25
Gastrointestinal Disease,Hepatic System Disease,Metabolic Disease,Organismal Injury and Abnormalities	hepatic steatosis	Hepatic steatosis	0.000186	0.0101	Increased	2.254	2.301	ADIPOR2,ARNTL,ATP2A2,BAG3,CBS/CBSL,CDKN1A,FBXW7,G6PC,GCK,LPIN1,MAT1A,MTHFR,NOS3,NR1H4,PDHB,SCD	16
Cancer,Organismal Injury and Abnormalities,Reproductive System Disease	development	Development of genital tumor	0.000197	0.0106				ABCB9,ABL1,ADAMTS7,ADIPOR2,ALS2,AOX1,AQP9,AVPR1A,BLM,C1S,C6,CBS/CBSL,CC2D2A,CDKN1A,CRY2,CYP4F8,DMXL2,DNAJB5,DOT1L,DYRK1B,EIF1AX,ELL2,ENPP2,F11,FADS3,FBXW7,FNIP2,FZD6,GEMIN5,GPR146,GRHPR,GYS2,H2BC10,HBB,HEATR1,HIF1A,HLA-E,HSP90B1,HSPH1,IDO2,IER3,IL1R1,INSC,IRX1,KDM4A,KIAA2026,KIF1B,KLF3,KMT2C,LGALS9B,LSG1,MAPKAPK2,MCM10,MDC1,MDN1,MED14,MICAL2,MYCBP2,MYO9B,NCOR2,NEDD9,NFIL3,NHSL1,NRBF2,PAPOLA,PCDH1…	111
Cancer,Organismal Injury and Abnormalities	upper aerodigestive tract carcinoma	Upper aerodigestive tract carcinoma	0.00021	0.0113				ABL1,ADAMTS7,ADIPOR2,AGO2,AOX1,ATP2A2,AVPR1A,CAMSAP2,CASP8AP2,CDC42EP1,CITED2,CNTROB,COL4A1,CYP4F8,DMXL2,DNAJB5,DOT1L,ENPP2,F11,FBXW7,FGD5,FZD6,GCH1,GEMIN5,GRHPR,GSS,HEATR1,HSP90B1,INPP5B,INSC,KCNH1,KMT2C,MAPKAPK2,MDN1,MYCBP2,MYO9B,NAA16,NCOR2,NDRG2,NR1H4,PAPOLA,PCDH12,PHLDB2,POU3F1,PRKCI,RBM14,SEPTIN11,SFPQ,SLC45A3,SLCO2B1,SPAG1,SUCO,TEAD1,TECPR2,TG,THBD,TRIM6-TRIM34,TUBB2A,UAP1,URB1,USP34,WNK1,…	64
Lipid Metabolism,Molecular Transport,Small Molecule Biochemistry	quantity	Quantity of non-esterified fatty acid	0.000213	0.0113		1.131	1.131	ANGPTL4,CBS/CBSL,CRAT,LPIN1	4
Protein Synthesis	polymerization	Polymerization of protein	0.000226	0.0119		0	-0.071	ANGPTL4,BLM,CAMK2G,CDC42EP1,EHD3,EIF2AK3,Fus,GCH1,GRHPR,Hba-a2/Hba1,HBB,Krt10,MAT1A,NCK1,Pakap,SEPTIN11,TOR1A,VAV2,VTN,Wasl	20
Cancer,Hematological Disease,Organismal Injury and Abnormalities	neoplasia	Neoplasia of blood cells	0.000228	0.0119		0.187	0.214	ABL1,ADAMTS7,AFAP1L1,AMACR,ANGPTL2,ANGPTL4,AOX1,ARNTL,ATP1B1,BLM,BMF,C6,CASP8AP2,CC2D2A,CDKN1A,CFLAR,CHORDC1,CITED2,COL4A1,CPT1B,CRAT,DMXL2,DOT1L,EIF2AK3,ERC1,FBXW7,FCGR3A/FCGR3B,GADD45G,GRHPR,HDAC11,HDHD3,HEATR1,HIF1A,HPS4,HSP90B1,HSPH1,IER3,IL1R1,INSC,IPO7,KCNH1,KIAA2026,KIF1B,KLF3,KMT2C,LGALS9B,LPIN1,MAB21L3,MDC1,MDN1,MERTK,MTHFR,MTMR4,NAA16,NAMPT,NCOR2,NDRG2,NEDD9,NHSL1,NOX4,PER3,PLEKHG6,PLPP…	89
Cardiovascular System Development and Function	morphology	Morphology of cardiovascular system	0.000228	0.0119				ABL1,AGO2,ARNTL,ATP2A2,BAG3,BNIP3,CBS/CBSL,CDKN1A,CFLAR,CITED2,DOT1L,EHD3,ENPP2,F11,FBXW7,FZD5,HIF1A,HSP90B1,IER3,IL1R1,MERTK,MTHFR,NCOR2,NOS3,NOX4,PGK1,PLPP3,PPARD,SLCO2B1,TEAD1,TG,THBD,VAV2,VTN,Wasl	35
Developmental Disorder,Tissue Morphology	abnormal morphology	Abnormal morphology of allantois	0.00023	0.0119				ENPP2,ERF,PLPP3,PRKCI,TEAD1,Wasl	6
Organ Morphology,Organismal Development,Organismal Injury and Abnormalities,Renal and Urological Disease,Renal and Urological System Development and Function	abnormal morphology	Abnormal morphology of dilated renal tubule	0.00023	0.0119				CDKN1A,EHD3,G6PC,Mt1,NOS3,SLC2A9	6
Neurological Disease,Skeletal and Muscular Disorders	neuromuscular disease	Neuromuscular disease	0.000238	0.0122				ABL1,ALG2,ATP1B1,ATP2A2,BANP,CFLAR,CPT1B,DBP,DNAJB1,EIF2AK3,FBXW7,FCGR3A/FCGR3B,FKBP4,G6PC,GCH1,HSP90B1,IER3,KIF1B,Klf16,KLF3,MERTK,NDRG2,PDE6C,PGK1,PIAS3,POU3F1,RHOBTB3,SCD,ST8SIA1,STMN1,TOR1A,USP36,WNK1,ZBTB16	34
Hematological System Development and Function,Tissue Morphology	quantity	Quantity of mononuclear leukocytes	0.00024	0.0122		-0.407	-0.49	ABL1,ARNTL,AVPR1A,BAG3,BLM,BMF,CAMK2G,CBS/CBSL,CDH17,CDKN1A,CFLAR,GADD45G,HIF1A,HSP90B1,IL1R1,KLF3,LGALS9B,MERTK,Mt1,NEDD9,NFIL3,NR1H4,SLC37A4,SLC39A10,SOX13,SPHK2,ST8SIA1,TG,VAV2,Wasl	30
Cellular Growth and Proliferation,Lymphoid Tissue Structure and Development	growth	Arrest in growth of lymphatic system cells	0.000252	0.0126				ABL1,CDKN1A,HIF1A	3
Connective Tissue Disorders,Organismal Injury and Abnormalities,Reproductive System Development and Function,Reproductive System Disease	abnormal morphology	Abnormal morphology of epigonadal fat pad	0.000252	0.0126				Irs3,KLF3,PPARD	3
Neurological Disease,Organismal Injury and Abnormalities	seizures	Seizures	0.000253	0.0126		-0.054	0.009	ANGPTL4,BACE1,BAG3,CA14,CDKN1A,CITED2,DNAJB1,DNAJB5,ELL2,FCGR3A/FCGR3B,G6PC,GADD45G,HBB,Mt1,NAMPT,NFIL3,NOS3,PTPRN,SLC37A4,ST8SIA1,YWHAG	21
Neurological Disease	damage	Damage of nervous system	0.000271	0.0134		0.458	0.493	CA14,CFLAR,EIF2AK3,F11,HIF1A,HSPH1,IL1R1,KMT2C,Mt1,NFIL3,NOS3,NOX4,PPARD,UNG	14
Connective Tissue Development and Function,Tissue Morphology	mass	Mass of white adipose tissue	0.000271	0.0134				ADIPOR2,ANGPTL4,ENPP2,Mt1,SCD	5
Cancer,Organismal Injury and Abnormalities	upper aero-digestive squamous cell carcinoma	Upper aero-digestive squamous cell carcinoma	0.000276	0.0135				ADAMTS7,AGO2,ATP2A2,AVPR1A,CAMSAP2,CASP8AP2,CDC42EP1,CITED2,COL4A1,CYP4F8,DMXL2,DNAJB5,ENPP2,F11,FBXW7,FZD6,GCH1,GEMIN5,GRHPR,HEATR1,HSP90B1,INPP5B,KCNH1,KMT2C,MAPKAPK2,MDN1,MYCBP2,MYO9B,NAA16,NDRG2,NR1H4,PAPOLA,PCDH12,PHLDB2,PRKCI,RBM14,SEPTIN11,SFPQ,SLC45A3,SLCO2B1,SPAG1,SUCO,TEAD1,TECPR2,TG,THBD,TRIM6-TRIM34,TUBB2A,UAP1,URB1,USP34,WNK1	52
Cancer,Organismal Injury and Abnormalities,Renal and Urological Disease	urinary tract tumor	Urinary tract tumor	0.000277	0.0135		0	0.01	ABHD15,ABL1,ALAS2,AMACR,ANGPTL2,AOX1,AQP9,ATP1B1,BCAR3,BLM,C1S,CAMK2G,CBS/CBSL,CDC42EP1,CDKN1A,CFLAR,DMXL2,DOT1L,EHD3,EIF2AK3,FBXW7,FNIP2,FZD6,GRHPR,H2BC10,HBB,HDHD3,HIF1A,HSP90B1,IL1R1,KIF1B,KLF3,KMT2C,LGALS9B,LOXL4,LPIN1,MDN1,MED14,MERTK,MICAL2,Mt1,MYCBP2,NCOR2,NOS3,NOX4,PCDH12,PDHB,PIAS3,POU3F1,RBM14,SCD,SLC20A2,SLC2A9,THBD,TMEM51,TOR1A,TSKU,TUBB2A,UBN1,UGP2,USP34,VILL,WNK1,ZNF436	64
Cell Cycle,Gene Expression	binding	Binding of DNA	0.000281	0.0136		1.004	0.961	ABL1,BANP,CDKN1A,CFLAR,DNAJB1,ERF,FZD6,HIF1A,IER3,IL1R1,MAPKAPK2,NOX4,NR1H4,PIAS3,PPARD,PRKCI,SCD,SFPQ,TEAD1,TEF,UBN1,YWHAG	22
Tissue Morphology	quantity	Quantity of cells	0.000287	0.0138		-0.724	-0.837	ABL1,ALS2,ARNTL,AVPR1A,BACE1,BAG3,BCAR3,BLM,BMF,C6,CAMK2G,CBS/CBSL,CDH17,CDKN1A,CFLAR,CITED2,CRY2,DOT1L,EIF2AK3,F11,FBXW7,Fus,GADD45G,HBB,HIF1A,HSP90B1,IL1R1,INSC,KCNH1,KIF1B,KLF3,LGALS9B,MAPKAPK2,MERTK,Mt1,MYO9B,NAB2,NEDD9,NFIL3,NOS3,NOX4,NR1H4,PPARD,PRKCI,PTPRN,SLC20A1,SLC37A4,SLC39A10,SOX13,SPHK2,ST8SIA1,STMN1,TEAD1,TFRC,TG,THBD,VAV2,VTN,Wasl,ZBTB16	60
Cell Death and Survival	apoptosis	Apoptosis of tumor cell lines	0.000287	0.0138		1.495	1.525	ABL1,ACSM5,ALS2,BAG3,BANP,BLM,BMF,BNIP3,CAMK2G,CASP8AP2,CDKN1A,CFLAR,COL4A1,DNAJB1,EIF2AK3,ENPP2,GADD45G,HDAC11,HIF1A,IER3,IL1R1,IRX1,KIF1B,MCM10,MDC1,MERTK,NDRG2,NEDD9,NFIL3,NOS3,NOX4,PIAS3,PPARD,PRKCI,SCD,SFPQ,SNX33,SPHK2,ST8SIA1,STMN1,TFRC,USP10,USP36,VTN,ZBTB16	45
Organismal Development	morphology	Morphology of body cavity	0.000293	0.014				ABL1,ADIPOR2,AGO2,AMACR,ANGPTL4,ARNTL,ATP2A2,BAG3,BMF,BNIP3,CBS/CBSL,CCS,CDH17,CDKN1A,CFLAR,CITED2,DNAJB9,DOT1L,EHD3,EIF2AK3,F11,FKBP4,G6PC,GADD45G,GCK,HIF1A,HSD17B2,HSP90B1,IER3,IL1R1,Irs3,KCNH1,LGALS9B,MAT1A,MERTK,Mt1,NCOR2,NFIL3,NOS3,NOX4,NR1H4,PGK1,PPARD,PRKCI,SLC20A1,SLC2A9,SLC37A4,SLCO2B1,TEAD1,TG,THBD,UNG,VAV2,Wasl,ZBTB16	55
Organismal Development	abnormal morphology	Abnormal morphology of body cavity	0.000302	0.0143				ABL1,AGO2,AMACR,ANGPTL4,ARNTL,ATP2A2,BAG3,BMF,BNIP3,CBS/CBSL,CCS,CDH17,CDKN1A,CFLAR,CITED2,DNAJB9,DOT1L,EHD3,EIF2AK3,F11,FKBP4,G6PC,GADD45G,HIF1A,HSD17B2,HSP90B1,IER3,IL1R1,LGALS9B,MAT1A,MERTK,Mt1,NCOR2,NFIL3,NOS3,NOX4,NR1H4,PGK1,PPARD,PRKCI,SLC20A1,SLC2A9,SLC37A4,SLCO2B1,TEAD1,TG,THBD,UNG,VAV2,Wasl	50
Cellular Development,Cellular Growth and Proliferation,Hematological System Development and Function,Humoral Immune Response,Lymphoid Tissue Structure and Development	proliferation	Proliferation of B lymphocytes	0.000308	0.0144		0.334	0.29	ABL1,CDKN1A,FCGR3A/FCGR3B,Fus,HIF1A,KLF3,LGALS9B,LPIN1,MERTK,SLC39A10,TFRC,UNG,VAV2,Wasl,ZBTB16	15
Lipid Metabolism,Molecular Transport,Small Molecule Biochemistry	concentration	Concentration of fatty acid	0.000308	0.0144		1.188	1.163	AMACR,ANGPTL4,ARNTL,CBS/CBSL,CRAT,G6PC,GCK,Irs3,LPIN1,MERTK,NOS3,NR1H4,PPARD,PRKCI,SCD	15
Cancer,Organismal Injury and Abnormalities	malignant neoplasm of retroperitoneum	Malignant neoplasm of retroperitoneum	0.00031	0.0144				ABL1,ACSM5,ADAM11,ADAMTS7,ALAS2,ALS2,AMACR,AOX1,AQP9,ARNTL,BCAR3,BLM,BNIP3,C1S,CA14,CASP8AP2,CBS/CBSL,CDC42EP1,CDKN1A,CFLAR,COL4A1,CRY2,EHD3,EIF2AK3,ELL2,ENPP2,ENTPD8,F11,FBXW7,FNIP2,FZD6,GEMIN5,GRHPR,HBB,HIF1A,HPS4,HSP90B1,IL1R1,INSC,INTS2,KIF1B,KLF3,KMT2C,LGALS9B,MDN1,MED14,MERTK,MICAL2,Mt1,MYCBP2,MYO9B,NAB2,NCOR2,NOS3,PDHB,PIAS3,POU3F1,PPFIBP2,PPME1,PTPRN,RBM14,RIBC1,SCD,SFXN1,SLC20A2,SLC2A5,S…	86
Cancer,Neurological Disease,Organismal Injury and Abnormalities	central nervous system neuroepithelial tumor	Central nervous system neuroepithelial tumor	0.000318	0.0148				ABL1,AOX1,ATP1B1,ATP2A2,BAG3,BMF,C6,CASP8AP2,CDKN1A,COL4A1,CYP4F8,DMXL2,DNAJB1,ENPP2,FBXW7,FGD5,HIF1A,HLA-E,HSP90B1,IL1R1,KLF3,KMT2C,MERTK,MYCBP2,NCOR2,PAPOLA,PCDH12,POU3F1,SLC20A1,SLC37A4,SLCO2B1,SPAG1,ST8SIA1,TUBB2A,USP36,VTN	36
Hereditary Disorder,Neurological Disease,Organismal Injury and Abnormalities,Psychological Disorders,Skeletal and Muscular Disorders	Huntington disease	Huntington Disease	0.000323	0.0149				ATP1B1,ATP2A2,BANP,CFLAR,CPT1B,DBP,DNAJB1,FBXW7,FKBP4,G6PC,IER3,Klf16,KLF3,MERTK,PDE6C,PGK1,PIAS3,POU3F1,RHOBTB3,SCD,ST8SIA1,WNK1,ZBTB16	23
Cell Death and Survival,Gastrointestinal Disease,Hepatic System Disease,Organismal Injury and Abnormalities	necrosis	Necrosis of liver	0.000325	0.0149		0.472	0.509	ABL1,AMACR,BMF,CBS/CBSL,CDKN1A,CFLAR,F11,G6PC,IER3,Mt1,NR1H4,SCD,SLC20A1	13
Cancer,Organismal Injury and Abnormalities,Renal and Urological Disease	development	Development of urinary tract tumor	0.000327	0.0149				ALAS2,AMACR,AOX1,AQP9,BLM,C1S,CBS/CBSL,CDKN1A,CFLAR,EHD3,FBXW7,FNIP2,GRHPR,HBB,HIF1A,HSP90B1,IL1R1,KIF1B,KLF3,KMT2C,MDN1,MED14,MERTK,MICAL2,Mt1,MYCBP2,NCOR2,PDHB,PIAS3,RBM14,SCD,SLC20A2,SLC2A9,THBD,TMEM51,TOR1A,TSKU,USP34	38
Cardiovascular System Development and Function,Cellular Movement	cell movement	Cell movement of endothelial cells	0.000328	0.0149		0.697	0.625	ABL1,ANGPTL4,CBS/CBSL,CDC42EP1,COL4A1,ENPP2,HIF1A,MAPKAPK2,NCK1,NOS3,NOX4,NR1H4,PLPP3,TG,THBD,VAV2,VTN,WNK1	18
Cancer,Organismal Injury and Abnormalities,Reproductive System Disease	female genital tract adenocarcinoma	Female genital tract adenocarcinoma	0.000334	0.0151				ABCB9,ABL1,ADAMTS7,ADIPOR2,ALS2,AOX1,AQP9,AVPR1A,BLM,C1S,C6,CBS/CBSL,CC2D2A,CDKN1A,CRY2,DMXL2,DNAJB5,DOT1L,DYRK1B,EIF1AX,ELL2,ENPP2,F11,FADS3,FBXW7,FNIP2,FZD6,GEMIN5,GPR146,H2BC10,HBB,HEATR1,HLA-E,HSP90B1,HSPH1,IDO2,INSC,IRX1,KDM4A,KIAA2026,KMT2C,LGALS9B,LSG1,MAPKAPK2,MCM10,MDC1,MDN1,MED14,MICAL2,MYCBP2,MYO9B,NCOR2,NEDD9,NFIL3,NHSL1,PAPOLA,PCDH12,PER3,PHLDB2,PIAS3,PLEKHG6,POU3F1,PPFIBP2,PRKCI,PYR…	95
Connective Tissue Development and Function,Tissue Morphology	quantity	Quantity of adipose tissue	0.00034	0.0152		-1.171	-1.221	AMACR,ANGPTL2,ANGPTL4,ARNTL,BAG3,CDKN1A,IL1R1,Irs3,KLF3,Mt1,NOS3,NR1H4,PPARD,SCD	14
Cancer,Endocrine System Disorders,Organismal Injury and Abnormalities,Reproductive System Disease	mixed cell epithelial ovarian cancer	Mixed ovarian carcinoma	0.000345	0.0154				ABCB9,ABL1,ADAMTS7,ALS2,DMXL2,ENPP2,FADS3,HEATR1,HLA-E,HSP90B1,KMT2C,LGALS9B,LSG1,MAPKAPK2,MDC1,MDN1,MYCBP2,NCOR2,NHSL1,PAPOLA,PHLDB2,PRKCI,SOX13,SPHK2,STMN1,TARBP1,TG,THNSL1,TUBB2A,WNK1,WWC3,ZNF436	32
Cancer,Organismal Injury and Abnormalities	head and neck squamous cell cancer	Head and neck squamous cell carcinoma	0.000347	0.0154				ADAMTS7,ANKRD33B,AOX1,ATP2A2,AVPR1A,BANP,CAMSAP2,CASP8AP2,CDC42EP1,CFLAR,CITED2,CNTROB,COL4A1,CYP4F8,DMXL2,DNAJB5,EFTUD2,ENPP2,F11,FADS3,FBXW7,FZD6,GCH1,GEMIN5,GRHPR,HEATR1,HSP90B1,IL1R1,INPP5B,KMT2C,LGALS9B,MAPKAPK2,MDN1,MYCBP2,MYO9B,NAA16,NCOR2,NDRG2,NR1D2,NR1H4,PAPOLA,PCDH12,PER3,PHLDB2,PRKCI,PRSS53,RBM14,RNGTT,SEPTIN11,SFPQ,SLC45A3,SLCO2B1,SPAG1,SPHK2,SUCO,TARBP1,TEAD1,TECPR2,TG,THBD,TMEM176A…	68
Cardiovascular Disease,Cardiovascular System Development and Function	abnormal morphology	Abnormal morphology of cardiovascular system	0.000354	0.0156				ABL1,AGO2,ATP2A2,BAG3,BNIP3,CBS/CBSL,CDKN1A,CFLAR,CITED2,DOT1L,EHD3,ENPP2,F11,FBXW7,FZD5,HIF1A,HSP90B1,IER3,IL1R1,MERTK,NCOR2,NOS3,NOX4,PGK1,PLPP3,PPARD,SLCO2B1,TEAD1,TG,THBD,VAV2,Wasl	32
Cancer,Organismal Injury and Abnormalities	metastasis	Secondary tumor	0.000355	0.0156		0.179	0.142	ABL1,AFAP1L1,ANGPTL2,ANGPTL4,CDH17,CDKN1A,CFLAR,COL4A1,DOT1L,ENPP2,FBXW7,FCGR3A/FCGR3B,GCH1,HIF1A,HLA-E,HSP90B1,IRX1,KIF1B,KMT2C,MDC1,MERTK,Mt1,MTHFR,NCOR2,NDRG2,NEDD9,NOS3,PLPP3,PRKCI,RAD51D,SCD,SRMS,STMN1,THBD,TUBB2A,VAV2,WNK1	37
Neurological Disease	neurodegeneration	Neurodegeneration	0.000359	0.0157		0.854	0.942	ALS2,ARNTL,ATP1B1,BACE1,C6,CRAT,EIF2AK3,HIF1A,NFIL3,NOX4,PPARD,SLC20A2,ST8SIA1,STMN1,TFRC,UNG	16
Connective Tissue Development and Function,Tissue Morphology	size	Size of connective tissue	0.000371	0.0161				ARNTL,AVPR1A,BLM,CDKN1A,ENPP2,FBXW7,IL1R1,LPIN1,NCOR2,NR1H4,PPARD	11
Lipid Metabolism,Small Molecule Biochemistry	synthesis	Synthesis of lipid	0.000382	0.0165		-0.866	-0.971	ADIPOR2,ALG12,ALG2,AMACR,ANGPTL4,ARNTL,AVPR1A,BNIP3,CAMK2G,CYP8B1,EIF2AK3,ENPP2,G6PC,HBB,HIF1A,HSD17B2,LPIN1,MTMR4,NFIL3,NR1H4,PDHB,PIGL,PLPP3,PPARD,PRKCI,SCD,SLC45A3,SPHK2,ST8SIA1,VTN,YWHAG	31
Cancer,Hematological Disease,Immunological Disease,Organismal Injury and Abnormalities	T-cell malignant neoplasm	T-cell malignant neoplasm	0.000386	0.0166		0.277	0.315	ABL1,ATP1B1,BMF,CDKN1A,CFLAR,COL4A1,ERC1,FBXW7,HDAC11,HSP90B1,HSPH1,IER3,KLF3,KMT2C,MERTK,NDRG2,POU3F1,RHOBTB3,RND2,STMN1,THBD,TUBB2A,USP10,VAV2,VTN	25
Cancer,Organismal Injury and Abnormalities	mixed cell carcinoma	Mixed cell carcinoma	0.000389	0.0167				ABCB9,ABL1,ADAMTS7,ALS2,DMXL2,ENPP2,FADS3,FBXW7,HEATR1,HLA-E,HSP90B1,KMT2C,LGALS9B,LSG1,MAPKAPK2,MDC1,MDN1,MYCBP2,NCOR2,NHSL1,PAPOLA,PHLDB2,PRKCI,SOX13,SPHK2,STMN1,TARBP1,TG,THNSL1,TUBB2A,WNK1,WWC3,ZNF436	33
Cancer,Neurological Disease,Organismal Injury and Abnormalities	central nervous system cancer	Central nervous system cancer	0.000392	0.0167				ABL1,AFAP1L1,AOX1,ATP1B1,ATP2A2,BAG3,BMF,C6,CASP8AP2,CDKN1A,COL4A1,CYP4F8,DMXL2,DNAJB1,ENPP2,FBXW7,FGD5,GEMIN5,HIF1A,HLA-E,HSP90B1,IL1R1,KLF3,KMT2C,MERTK,MYCBP2,NCOR2,PAPOLA,PCDH12,POU3F1,SLC20A1,SLC37A4,SLCO2B1,SPAG1,SRMS,ST8SIA1,TUBB2A,USP36,VTN	39
Cancer,Immunological Disease,Organismal Injury and Abnormalities	hyperplasia	Hyperplasia of spleen	0.0004	0.0169		-0.816	-0.719	BMF,CDKN1A,GADD45G,LGALS9B,Mt1,UNG	6
Cancer,Organismal Injury and Abnormalities	ductal carcinoma	Ductal carcinoma	0.000402	0.0169				ABL1,ACSM5,ADAM11,ADAMTS7,ALS2,ARNTL,BCAR3,BNIP3,C1S,CA14,CASP8AP2,CDKN1A,COL4A1,CRY2,EIF1AX,EIF2AK3,ELL2,ENPP2,ENTPD8,F11,FAM20C,FBXW7,FNIP2,GRHPR,HLA-E,HPS4,HSP90B1,IER3,INSC,INTS2,IRX1,KCNH1,KIF1B,KMT2C,LGALS9B,MDC1,MDN1,MED14,MICAL2,MYCBP2,MYO9B,NAB2,NCOR2,NOS3,PAPOLA,PCDH12,PGK1,PIAS3,PPFIBP2,PPME1,PRKCI,PTPRN,RBM14,SFXN1,SLC16A11,SLC20A1,SLC20A2,SLC2A5,SLC2A9,ST8SIA1,TARBP1,TECPR2,TEF,TG,TH…	75
Free Radical Scavenging,Molecular Transport	accumulation	Accumulation of reactive oxygen species	0.000403	0.0169		0	-0.009	ANGPTL2,AQP9,ATP2A2,CBS/CBSL,EIF2AK3,NOS3,NOX4	7
Cancer,Organismal Injury and Abnormalities,Renal and Urological Disease	kidney carcinoma	Kidney carcinoma	0.000406	0.017				ALAS2,AMACR,AOX1,AQP9,BLM,C1S,CBS/CBSL,CDKN1A,CFLAR,EHD3,FBXW7,GRHPR,HBB,HIF1A,HSP90B1,IL1R1,KIF1B,KLF3,KMT2C,MDN1,MED14,MERTK,MICAL2,Mt1,MYCBP2,NCOR2,PDHB,PIAS3,RBM14,SCD,SLC20A2,SLC2A9,THBD,TMEM51,TOR1A,TSKU,TUBB2A,USP34	38
Cancer,Organismal Injury and Abnormalities,Renal and Urological Disease	urinary tract cancer	Urinary tract cancer	0.000427	0.0177				ABHD15,ABL1,ALAS2,AMACR,ANGPTL2,AOX1,AQP9,ATP1B1,BCAR3,BLM,C1S,CAMK2G,CBS/CBSL,CDC42EP1,CDKN1A,CFLAR,DMXL2,DOT1L,EHD3,EIF2AK3,FBXW7,FZD6,GRHPR,H2BC10,HBB,HDHD3,HIF1A,HSP90B1,IL1R1,KIF1B,KLF3,KMT2C,LGALS9B,LPIN1,MDN1,MED14,MERTK,MICAL2,Mt1,MYCBP2,NCOR2,NOS3,NOX4,PCDH12,PDHB,PIAS3,POU3F1,RBM14,SCD,SLC20A2,SLC2A9,THBD,TMEM51,TOR1A,TSKU,TUBB2A,UBN1,UGP2,USP34,VILL,WNK1,ZNF436	62
Cancer,Organismal Injury and Abnormalities	adenosquamous carcinoma	Adenosquamous carcinoma	0.000428	0.0177				ABCB9,ABL1,ADAMTS7,ALS2,DMXL2,ENPP2,FADS3,HEATR1,HLA-E,HSP90B1,KMT2C,LGALS9B,LSG1,MAPKAPK2,MDC1,MDN1,MYCBP2,NCOR2,NHSL1,PAPOLA,PHLDB2,PRKCI,SOX13,SPHK2,STMN1,TARBP1,TG,THNSL1,TUBB2A,WNK1,WWC3,ZNF436	32
Cancer,Organismal Injury and Abnormalities	development	Development of adenocarcinoma	0.000441	0.0181				ABCB9,ABL1,ADAMTS7,ADIPOR2,AGO2,ALAS2,ALS2,AMACR,AOX1,AQP9,ATP2A2,AVPR1A,BLM,C1S,C6,CAPRIN1,CBS/CBSL,CC2D2A,CDKN1A,CFLAR,COL4A1,CRY2,DMXL2,DNAJB5,DOT1L,DYRK1B,EHD3,EIF1AX,ELL2,ENPP2,F11,FADS3,FBXW7,FNIP2,FZD6,GEMIN5,GPR146,GPRIN3,GRHPR,GYS2,H2BC10,HBB,HEATR1,HIF1A,HLA-E,HSP90B1,HSPH1,IDO2,IL1R1,INSC,IRX1,KDM4A,KIAA2026,KIF1B,KLF3,KMT2C,LGALS9B,LSG1,MAPKAPK2,MCM10,MDC1,MDN1,MED14,MERTK,MICAL2,Mt1,…	121
Lymphoid Tissue Structure and Development,Tissue Morphology	quantity	Quantity of lymphatic system cells	0.000446	0.0183		-0.474	-0.555	ABL1,ARNTL,AVPR1A,BAG3,BLM,BMF,CAMK2G,CDH17,CDKN1A,CFLAR,GADD45G,HIF1A,HSP90B1,IL1R1,KLF3,LGALS9B,MERTK,Mt1,NEDD9,NFIL3,SLC20A1,SLC37A4,SLC39A10,SOX13,SPHK2,ST8SIA1,TG,VAV2,Wasl,ZBTB16	30
Lipid Metabolism,Nucleic Acid Metabolism,Small Molecule Biochemistry	conversion	Conversion of acyl-coenzyme A	0.000454	0.0185				AMACR,CPT1B,CRAT	3
Cancer,Hematological Disease,Organismal Injury and Abnormalities	hematologic cancer	Hematologic cancer of cells	0.000456	0.0185		-0.269	-0.236	ABL1,AFAP1L1,AMACR,ATP1B1,BLM,BMF,CDKN1A,CFLAR,COL4A1,DMXL2,ENPP2,ERC1,FBXW7,FCGR3A/FCGR3B,GADD45G,HDAC11,HIF1A,HSP90B1,HSPH1,IER3,INSC,IPO7,KLF3,KMT2C,LGALS9B,LPIN1,MERTK,MTHFR,MTMR4,NAA16,NAMPT,NCOR2,NDRG2,NEDD9,PLEKHG6,POU3F1,PRKCI,RBM14,RHOBTB3,RND2,SFXN1,SRMS,STMN1,THBD,TMEM268,TSPAN12,TUBB2A,UBN1,UNG,USP10,USP34,VAV2,VTN,WDR91,WWC3,ZBTB16	56
Neurological Disease,Organismal Injury and Abnormalities,Psychological Disorders	brain damage	Brain damage	0.000463	0.0186		0.493	0.528	CA14,CFLAR,F11,HIF1A,HSPH1,IL1R1,KMT2C,NFIL3,NOS3,NOX4,PPARD,UNG	12
Cancer,Organismal Injury and Abnormalities,Renal and Urological Disease	metastatic renal cancer	Metastatic renal cancer	0.000463	0.0186				HIF1A,HSP90B1,MERTK,Mt1,SCD,TUBB2A	6
Cell Death and Survival	cell death	Cell death of tumor cell lines	0.000474	0.0189		1.536	1.569	ABL1,ACSM5,ALS2,ATP2A2,BAG3,BANP,BLM,BMF,BNIP3,CAMK2G,CASP8AP2,CDKN1A,CFLAR,COL4A1,DNAJB1,EIF1AX,EIF2AK3,ENPP2,GADD45G,HDAC11,HIF1A,IER3,IL1R1,IRX1,KIF1B,MAPKAPK2,MCM10,MDC1,MERTK,MTHFR,NAMPT,NDRG2,NEDD9,NFIL3,NOS3,NOX4,PDE12,PIAS3,PPARD,PRKCI,SCD,SFPQ,SNX33,SPHK2,ST8SIA1,STMN1,TFRC,USP10,USP36,VTN,WWC3,YWHAG,ZBTB16	53
Hematological Disease,Metabolic Disease,Organismal Injury and Abnormalities	dysglycemia	Dysglycemia	0.000476	0.0189	Increased	2.58	2.687	ADIPOR2,ARNTL,BAG3,DNAJB9,EIF2AK3,FKBP4,G6PC,GCK,Irs3,NR1H4,PPARD,SCD,SLC37A4	13
Cancer,Endocrine System Disorders,Organismal Injury and Abnormalities,Reproductive System Disease	endometrioid ovarian cancer	Ovarian endometrioid carcinoma	0.000482	0.019				ABCB9,ABL1,ADAMTS7,ALS2,DMXL2,ENPP2,FADS3,HEATR1,HLA-E,HSP90B1,KMT2C,LGALS9B,LSG1,MAPKAPK2,MDC1,MDN1,MYCBP2,NCOR2,NHSL1,PAPOLA,PHLDB2,PRKCI,SOX13,SPHK2,STMN1,TARBP1,TG,THNSL1,TUBB2A,WNK1,WWC3,ZNF436	32
Cancer,Hematological Disease,Organismal Injury and Abnormalities	mature lymphocytic neoplasm	Mature lymphocytic neoplasm	0.000482	0.019				ABL1,AMACR,ATP1B1,BMF,CDKN1A,CFLAR,CITED2,COL4A1,DMXL2,EIF2AK3,ERC1,FBXW7,FCGR3A/FCGR3B,GRHPR,HDAC11,HSP90B1,HSPH1,INSC,KLF3,KMT2C,LPIN1,MERTK,MTMR4,NAA16,NAMPT,NCOR2,NEDD9,PLEKHG6,PLPP3,PNRC1,POU3F1,PRKCI,RBM14,RHOBTB3,SRMS,STMN1,TFRC,THBD,TMEM268,TSPAN12,TUBB2A,UBN1,USP10,USP34,VAV2,VTN,WDR91,WWC3,ZBTB16	49
Energy Production	consumption	Consumption of oxygen	0.000488	0.019		1.292	1.285	ANGPTL4,BAG3,CBS/CBSL,DNAJB1,FBXW7,GCH1,HBB,NAMPT,NOS3,PAPOLA,SCD	11
Cell Death and Survival	cell viability	Cell viability	0.000488	0.019		-0.942	-1.102	ABL1,AGO2,ALS2,BAG3,BLM,BNIP3,CAMK2G,CDKN1A,CFLAR,DOT1L,DYRK1B,EFTUD2,EIF2AK3,FCGR3A/FCGR3B,FKBP4,GCH1,HBB,HEATR1,HIF1A,HSP90B1,HSPH1,IER3,INPP5B,KIF1B,MAPKAPK2,MDC1,MED14,MICAL2,Mt1,MTHFR,NAMPT,NDRG2,NFIL3,NOX4,NR1H4,PPARD,PRKCI,PTPRN,RAD51D,SCD,SLC37A4,STMN1,THBD,UNG,USP10,USP36,VTN,ZBTB16	48
Cancer,Dermatological Diseases and Conditions,Organismal Injury and Abnormalities	skin tumor	Skin tumor	0.000492	0.019		1.32	1.327	ABHD15,ABL1,ACSM5,ADAM11,ADAMTS7,ADIPOR2,AFAP1L1,ALG12,ALS2,AMACR,ANGPTL2,ANGPTL4,ANKRD13C,ANKRD33B,ANKRD46,ANKS4B,AOX1,AQP9,ARNTL,ATP2A2,BAG3,BCAR3,BLM,C1S,C4orf46,C6,CALCOCO1,CAMK2G,CAMSAP2,CAPRIN1,CC2D2A,CDC42EP1,CDH17,CDKN1A,CFLAR,CHORDC1,COL4A1,CRY2,CYP4F8,CYP8B1,DMXL2,DNAJB1,DNAJB5,DOT1L,EEPD1,EFTUD2,EHD3,ELL2,ENPP2,ENTPD8,F11,FADS3,FAM20C,FBXW7,FCGR3A/FCGR3B,FGD5,FKBP4,FZD5,G6PC,GCK,GEMIN5…	157
Lipid Metabolism,Molecular Transport,Small Molecule Biochemistry	abnormal quantity	Abnormal quantity of lipid	0.000493	0.019				AMACR,ARNTL,AVPR1A,CYP8B1,GCK,NR1H4,PLPP3,PPARD,SCD	9
Molecular Transport,Protein Synthesis,Protein Trafficking	localization	Localization of protein	0.000495	0.019		0.6	0.603	ALS2,ATP1B1,BACE1,CBS/CBSL,CDKN1A,EHD3,FKBP4,MERTK,Mt1,MTHFR,MYCBP2,Pakap,TFRC,Wasl	14
Carbohydrate Metabolism	metabolism	Metabolism of glycogen	0.000497	0.019				G6PC,GCK,GYS2,PCDH12,SLC37A4	5
Embryonic Development,Organ Development,Organ Morphology,Organismal Development,Renal and Urological System Development and Function,Tissue Development	mass	Mass of kidney	0.000497	0.019				ARNTL,CDKN1A,EHD3,G6PC,HSD17B2,NOS3	6
Developmental Disorder,Gastrointestinal Disease,Hepatic System Disease,Hereditary Disorder,Metabolic Disease,Organismal Injury and Abnormalities	glycogen storage disease type I	Glycogen storage disease type I	0.000513	0.0191				G6PC,SLC37A4	2
Carbohydrate Metabolism,Molecular Transport,Small Molecule Biochemistry	uptake	Uptake of glucose-6-phosphate	0.000513	0.0191				G6PC,SLC37A4	2
Cardiovascular Disease,Cell Morphology	mineralization	Mineralization of valvular interstitial cells	0.000513	0.0191				SLC20A1,SLC20A2	2
Lipid Metabolism,Small Molecule Biochemistry	metabolism	Metabolism of stearic acid	0.000513	0.0191				DBP,TEF	2
Neurological Disease	dyskinesia	Dyskinesia	0.000514	0.0191				ALS2,ATP1B1,ATP2A2,BANP,CFLAR,CPT1B,DBP,DNAJB1,FBXW7,FKBP4,G6PC,IER3,Klf16,KLF3,MERTK,PDE6C,PGK1,PIAS3,POU3F1,RHOBTB3,SCD,ST8SIA1,WNK1,ZBTB16	24
Connective Tissue Development and Function	adipogenesis	Adipogenesis	0.000514	0.0191		-1.905	-1.916	DYRK1B,GYS2,LPIN1,MED14,NCOR2,PER3,PPARD,Rorc,SFPQ	9
Hereditary Disorder,Neurological Disease,Organismal Injury and Abnormalities	familial encephalopathy	Familial encephalopathy	0.000516	0.0191				ALAS2,ALS2,ATP1B1,ATP2A2,BACE1,BANP,CA14,CC2D2A,CFLAR,COL4A1,CPT1B,CYP8B1,DBP,DNAJB1,ENPP2,ERC1,FBXW7,FCGR3A/FCGR3B,FKBP4,G6PC,GCH1,IER3,Klf16,KLF3,MERTK,NOS3,PDE6C,PGK1,PIAS3,POU3F1,RHOBTB3,SCD,SLC20A2,SLC25A19,SPAG1,ST8SIA1,TECPR2,TUBB2A,WNK1,YWHAG,ZBTB16	41
Behavior	sleep pattern	Sleep pattern	0.000537	0.0198				ARNTL,HSD17B2,IL1R1,PER3	4
Cancer,Dermatological Diseases and Conditions,Organismal Injury and Abnormalities	skin cancer	Skin cancer	0.000546	0.02				ABHD15,ABL1,ACSM5,ADAM11,ADAMTS7,ADIPOR2,AFAP1L1,ALG12,ALS2,AMACR,ANGPTL2,ANKRD13C,ANKRD33B,ANKRD46,ANKS4B,AOX1,AQP9,ARNTL,ATP2A2,BAG3,BCAR3,BLM,C1S,C4orf46,C6,CALCOCO1,CAMK2G,CAMSAP2,CAPRIN1,CC2D2A,CDC42EP1,CDH17,CDKN1A,CFLAR,CHORDC1,COL4A1,CRY2,CYP4F8,CYP8B1,DMXL2,DNAJB1,DNAJB5,DOT1L,EEPD1,EFTUD2,EHD3,ELL2,ENPP2,ENTPD8,F11,FADS3,FAM20C,FBXW7,FCGR3A/FCGR3B,FGD5,FKBP4,FZD5,G6PC,GCK,GEMIN5,GPRIN3,…	156
Neurological Disease	epilepsy or neurodevelopmental disorder	Epilepsy or neurodevelopmental disorder	0.000552	0.0201				ANGPTL4,BAG3,CA14,CDKN1A,CITED2,COL4A1,DBP,DNAJB1,DNAJB5,ELL2,FCGR3A/FCGR3B,GADD45G,HBB,HSP90B1,NAMPT,NFIL3,SPAG1,TEF,TUBB2A,YWHAG	20
Gene Expression	activation	Activation of DNA endogenous promoter	0.000554	0.0201		-0.09	-0.155	ABL1,AGO2,ARNTL,CALCOCO1,CITED2,CRY2,DBP,DNAJB5,ERF,FNIP2,Fus,FZD5,HIF1A,HSPH1,IRX1,Klf16,KLF3,LPIN1,MED14,NAMPT,NCK1,NCOR2,NFIL3,NR1D2,NR1H4,NRBF2,PER3,PIAS3,POU3F1,PPARD,PTPRN,RBM14,Rorc,Rps6ka5,SFPQ,TARBP1,TEAD1,TEF,UBN1,Wasl,WWC3,ZBTB16	42
Cardiovascular System Development and Function,Organismal Development	vasculogenesis	Vasculogenesis	0.000556	0.0201		0.372	0.296	ADIPOR2,ANGPTL2,ANGPTL4,ARNTL,BACE1,C6,CBS/CBSL,CDKN1A,CITED2,COL4A1,EHD3,ENPP2,FBXW7,FZD5,HIF1A,MAPKAPK2,MERTK,MTHFR,MYO9B,NAB2,NCK1,NOS3,NOX4,PLPP3,PPARD,SPHK2,THBD,VTN,WNK1,YWHAG	30
Protein Synthesis	quantity	Quantity of protein in blood	0.000569	0.0203		-1.11	-1.093	ADIPOR2,AMACR,ANGPTL4,ARNTL,BAG3,CRY2,EIF2AK3,ENPP2,FAM20C,GCK,IL1R1,Irs3,MAPKAPK2,MERTK,Mt1,NFIL3,NOS3,NR1H4,SCD,THBD,VAV2	21
Molecular Transport	transport	Transport of Na+	0.00057	0.0203				ATP1B1,NDRG2,NOS3,PPME1,SLC20A1,SLC38A3,WNK1	7
Cancer,Neurological Disease,Organismal Injury and Abnormalities	ependymoma	Ependymoma	0.000571	0.0203				ABL1,BANP,HIF1A,HSP90B1,SOX13,TUBB2A	6
Cardiovascular Disease,Neurological Disease,Organismal Injury and Abnormalities	ischemia	Ischemia of brain	0.000571	0.0203		0.896	0.909	F11,HIF1A,HSPH1,NOS3,NOX4,UNG	6
Hematological System Development and Function,Lymphoid Tissue Structure and Development,Tissue Morphology	quantity	Quantity of lymphocytes	0.000575	0.0203		-0.543	-0.629	ABL1,ARNTL,AVPR1A,BAG3,BLM,BMF,CAMK2G,CDH17,CDKN1A,CFLAR,GADD45G,HIF1A,HSP90B1,IL1R1,KLF3,LGALS9B,MERTK,Mt1,NEDD9,NFIL3,SLC37A4,SLC39A10,SOX13,SPHK2,ST8SIA1,TG,VAV2,Wasl	28
Neurological Disease	neurological signs	Neurological signs	0.000579	0.0203				ALS2,ATP1B1,ATP2A2,AVPR1A,BACE1,BANP,CFLAR,CPT1B,DBP,DNAJB1,FBXW7,FKBP4,G6PC,IER3,Klf16,KLF3,MERTK,NOX4,PDE6C,PGK1,PIAS3,POU3F1,RHOBTB3,SCD,ST8SIA1,WNK1,ZBTB16	27
Reproductive System Development and Function	morphology	Morphology of reproductive system	0.000579	0.0203				AGO2,ANGPTL4,ARNTL,BAG3,BLM,BMF,CBS/CBSL,CCS,CDKN1A,ENPP2,ERF,FKBP4,GADD45G,HSD17B2,IL1R1,INPP5B,Irs3,KLF3,MERTK,Mt1,NOS3,NR1H4,PPARD,SLC20A1,SLC2A5,ZBTB16	26
Cardiovascular Disease,Organismal Injury and Abnormalities	infarction	Infarction	0.000583	0.0204		0.277	0.279	BNIP3,C6,CA14,F11,FCGR3A/FCGR3B,HIF1A,HSPH1,IL1R1,MAPKAPK2,MTHFR,NAMPT,NOS3,NOX4,PPARD,THBD,TUBB2A,UNG	17
Cancer,Organismal Injury and Abnormalities,Renal and Urological Disease	renal cell cancer	Renal cell carcinoma	0.000592	0.0206				ALAS2,AMACR,AOX1,AQP9,BLM,C1S,CBS/CBSL,CDKN1A,CFLAR,EHD3,FBXW7,GRHPR,HBB,HIF1A,HSP90B1,IL1R1,KIF1B,KLF3,KMT2C,MDN1,MED14,MERTK,MICAL2,Mt1,MYCBP2,NCOR2,PDHB,PIAS3,RBM14,SCD,SLC20A2,SLC2A9,THBD,TMEM51,TOR1A,TSKU,USP34	37
Molecular Transport	excretion	Excretion of Na+	0.000596	0.0206				AVPR1A,DBP,HIF1A,NOS3,TEF	5
Cancer,Organismal Injury and Abnormalities,Renal and Urological Disease	metastatic renal cell cancer	Metastatic renal cell carcinoma	0.000596	0.0206				HIF1A,HSP90B1,MERTK,Mt1,SCD	5
Cellular Development,Connective Tissue Development and Function	adipogenesis	Adipogenesis of fibroblast cell lines	0.000612	0.021		-1.561	-1.572	LPIN1,MED14,NCOR2,PER3,PPARD,SFPQ	6
Protein Synthesis	oligomerization	Oligomerization of protein	0.000625	0.0214				ANGPTL4,BLM,CAMK2G,EHD3,EIF2AK3,Fus,GCH1,GRHPR,Hba-a2/Hba1,HBB,MAT1A,Pakap,SEPTIN11,TOR1A	14
Organismal Development,Organismal Injury and Abnormalities	abnormal morphology	Abnormal morphology of abdomen	0.000632	0.0215				ABL1,AMACR,ANGPTL4,ARNTL,AVPR1A,BMF,CBS/CBSL,CCS,CDH17,CDKN1A,CFLAR,CITED2,DNAJB9,EHD3,EIF2AK3,F11,FAM20C,FKBP4,G6PC,GADD45G,HSD17B2,LGALS9B,MAT1A,MERTK,Mt1,NFIL3,NOS3,NOX4,NR1H4,SLC20A1,SLC2A9,SLC37A4,UNG,VAV2	34
Cancer,Organismal Injury and Abnormalities	metastatic solid tumor	Metastatic solid tumor	0.000634	0.0215		-0.75	-0.773	ABL1,AFAP1L1,ANGPTL2,ANGPTL4,CDH17,COL4A1,DOT1L,ENPP2,FCGR3A/FCGR3B,GCH1,HIF1A,HLA-E,HSP90B1,IRX1,KMT2C,MDC1,MERTK,Mt1,MTHFR,PLPP3,PRKCI,RAD51D,SCD,SRMS,THBD,TUBB2A	26
Gastrointestinal Disease,Hepatic System Disease,Organismal Injury and Abnormalities	damage	Liver Damage	0.000635	0.0215		0.902	0.896	BNIP3,CDKN1A,GSS,IL1R1,Mt1,MTHFR,NOS3,NR1H4,PPARD,SCD,SLC39A10	11
Cancer,Hematological Disease,Organismal Injury and Abnormalities	mature T-cell or NK-cell neoplasm	Mature T-cell or NK-cell neoplasm	0.000641	0.0216				ABL1,ATP1B1,CFLAR,COL4A1,FBXW7,HDAC11,HSP90B1,KLF3,KMT2C,MERTK,NAA16,POU3F1,RHOBTB3,STMN1,THBD,TUBB2A,UBN1,USP10,VAV2,VTN	20
Cancer,Organismal Injury and Abnormalities	malignant solid organ tumor	Malignant solid organ tumor	0.000648	0.0217		0.934	0.934	ABHD15,ABL1,ACSM5,ADAM11,ADAMTS7,ADIPOR2,AFAP1L1,ALG12,ALS2,AMACR,ANGPTL2,ANKRD13C,ANKRD33B,ANKRD46,ANKS4B,AOX1,AQP9,ARNTL,ATP2A2,BAG3,BCAR3,BLM,C1S,C4orf46,C6,CALCOCO1,CAMK2G,CAMSAP2,CAPRIN1,CC2D2A,CDC42EP1,CDH17,CDKN1A,CFLAR,CHORDC1,COL4A1,CRY2,CYP4F8,CYP8B1,DMXL2,DNAJB1,DNAJB5,DOT1L,EEPD1,EFTUD2,EHD3,ELL2,ENPP2,ENTPD8,F11,FADS3,FAM20C,FBXW7,FCGR3A/FCGR3B,FGD5,FKBP4,FZD5,G6PC,GCK,GEMIN5,GPRIN3,…	158
Cellular Development,Connective Tissue Development and Function	differentiation	Differentiation of fibroblast cell lines	0.000654	0.0218		-0.496	-0.527	ABL1,ADAMTS7,CDKN1A,FAM20C,FBXW7,HIF1A,LPIN1,NR1H4,PPARD,SLC2A5	10
Gastrointestinal Disease,Immunological Disease,Organismal Injury and Abnormalities	celiac disease	Celiac disease	0.000697	0.0231				HLA-E,MYO9B,TFRC,TG	4
Lipid Metabolism,Molecular Transport,Small Molecule Biochemistry	concentration	Concentration of bile acid	0.000697	0.0231				CYP8B1,KMT2C,NR1H4,SCD	4
Tissue Morphology	morphology	Morphology of white adipose tissue	0.000708	0.0233				ADIPOR2,ANGPTL4,ARNTL,ENPP2,Mt1,NR1H4,SCD	7
Cardiovascular Disease,Connective Tissue Disorders,Organismal Injury and Abnormalities	edema	Edema of pericardial cavity	0.00071	0.0233		0.447	0.542	ABL1,AGO2,CFLAR,FBXW7,RAD51D	5
Cell Morphology	polarization	Polarization of leukocytes	0.000716	0.0235		-0.761	-0.842	ADIPOR2,AQP9,BCAR3,ENPP2,HIF1A,MYO9B,NAMPT,PRKCI	8
Cellular Assembly and Organization	formation	Formation of cytoskeleton	0.000725	0.0237		-0.089	-0.153	ABL1,AVPR1A,CAMSAP2,CDKN1A,ERP29,FBXW7,FKBP4,INPP5B,NCK1,NOX4,Pakap,PHLDB2,PLEKHG6,PRKCI,STMN1,VAV2,VTN,Wasl	18
Digestive System Development and Function,Gastrointestinal Disease,Hepatic System Development and Function,Hepatic System Disease,Organ Morphology,Organismal Development,Organismal Injury and Abnormalities	abnormal morphology	Abnormal morphology of liver	0.000745	0.0241				ABL1,AMACR,CBS/CBSL,CDKN1A,F11,G6PC,MAT1A,Mt1,NOS3,NR1H4,SLC20A1,SLC37A4	12
Protein Synthesis	quantity	Quantity of TNF in blood	0.000745	0.0241		-0.243	-0.221	CRY2,ENPP2,MAPKAPK2,MERTK,NFIL3,THBD	6
Cell Morphology,Connective Tissue Development and Function,Tissue Morphology	size	Size of connective tissue cells	0.000767	0.0247				ARNTL,CDKN1A,ENPP2,FBXW7,IL1R1,LPIN1,NCOR2,NR1H4,PPARD	9
Organismal Development	mass	Mass of organism	0.000799	0.0257		-0.913	-0.964	AMACR,BLM,CDKN1A,CFLAR,CRAT,EIF2AK3,Fus,GCK,HIF1A,IL1R1,LPIN1,Mt1,NOS3,NR1H4,PPARD,SCD	16
Cardiovascular System Development and Function	development	Development of vasculature	0.000814	0.026		0.46	0.384	ABL1,ADIPOR2,AGO2,ANGPTL2,ANGPTL4,ARNTL,BACE1,C6,CBS/CBSL,CDKN1A,CITED2,COL4A1,EHD3,EIF2AK3,ENPP2,F11,FBXW7,FZD5,HIF1A,IRX1,MAPKAPK2,MERTK,MTHFR,MYO9B,NAB2,NCK1,NOS3,NOX4,PGK1,PLPP3,PPARD,SPHK2,THBD,TSPAN12,VAV2,VTN,WNK1,YWHAG	38
Inflammatory Response	inflammation	Inflammation of body cavity	0.000823	0.0262		-0.645	-0.565	ABL1,ADIPOR2,ATP1B1,BLM,BMF,CAMK2G,CBS/CBSL,CDKN1A,COL4A1,F11,FCGR3A/FCGR3B,GADD45G,GCH1,GSS,HIF1A,HSP90B1,IL1R1,KLF3,KMT2C,LGALS9B,LPIN1,MAPKAPK2,MAT1A,MERTK,Mt1,MTHFR,NCOR2,NFIL3,NOS3,NR1H4,POU3F1,PTPRN,SCD,SLC2A9,TFRC	35
Cell Death and Survival	apoptosis	Apoptosis of lymphoid organ	0.000828	0.0263		-0.99	-0.998	ABL1,BLM,BMF,CDKN1A,CFLAR,HIF1A,Mt1,Rorc,SPHK2	9
Cancer,Organismal Injury and Abnormalities	extraadrenal retroperitoneal tumor	Extraadrenal retroperitoneal tumor	0.000836	0.0264		0.128	0.128	ABL1,ACSM5,ADAM11,ADAMTS7,ALAS2,ALS2,AMACR,AOX1,AQP9,ARNTL,BCAR3,BLM,BNIP3,C1S,CA14,CAMSAP2,CASP8AP2,CBS/CBSL,CDC42EP1,CDKN1A,CFLAR,COL4A1,CRY2,EHD3,EIF1AX,EIF2AK3,ELL2,ENPP2,ENTPD8,F11,FBXW7,FNIP2,FZD6,GEMIN5,GRHPR,HBB,HIF1A,HPS4,HSP90B1,IL1R1,INSC,INTS2,KIF1B,KLF3,KMT2C,LGALS9B,MDN1,MED14,MERTK,MICAL2,Mt1,MYCBP2,MYO9B,NAB2,NCOR2,NDRG2,NHSL1,NOS3,PDHB,PIAS3,POU3F1,PPFIBP2,PPME1,PTPRN,RBM14,RIBC1…	91
Developmental Disorder,Hereditary Disorder,Metabolic Disease,Organismal Injury and Abnormalities	inborn error of carbohydrate metabolism	Inborn error of carbohydrate metabolism	0.000855	0.0269				ALG12,ALG2,FCGR3A/FCGR3B,G6PC,GRHPR,GYS2,RFT1,SLC37A4	8
Cell Morphology,Tissue Morphology	morphology	Morphology of connective tissue cells	0.000877	0.0275				ARNTL,CBS/CBSL,CDKN1A,CITED2,EIF2AK3,ENPP2,FBXW7,IL1R1,INPP5B,LPIN1,Mt1,NCOR2,NR1H4,PPARD,TG	15
Cell Death and Survival	apoptosis	Apoptosis of renal tubule	0.00091	0.0282		0.555	0.576	CDKN1A,HIF1A,Mt1,NOS3,STMN1	5
Cellular Development,Cellular Growth and Proliferation	proliferation	Arrest in proliferation of blood cells	0.000911	0.0282				ABL1,CDKN1A,HIF1A	3
Cell Morphology,Cellular Assembly and Organization	size	Size of endosomes	0.000911	0.0282				ALS2,BACE1,Srsf5	3
Digestive System Development and Function	morphology	Morphology of digestive system	0.000913	0.0282				ABL1,ADIPOR2,AMACR,ANGPTL4,ARNTL,BAG3,CBS/CBSL,CDKN1A,DNAJB9,EIF2AK3,F11,FAM20C,G6PC,GCK,HIF1A,IL1R1,Irs3,LGALS9B,MAT1A,MERTK,Mt1,NFIL3,NOS3,NR1H4,PRKCI,SLC20A1,SLC37A4	27
Nutritional Disease,Organismal Injury and Abnormalities	cachexia	Cachexia	0.000917	0.0283		1.067	1.136	ABL1,ATP2A2,BACE1,EIF2AK3,HSP90B1,NR1H4,TUBB2A	7
Cell Death and Survival	cell viability	Cell viability of tumor cell lines	0.000926	0.0284		-1.317	-1.452	ABL1,AGO2,ALS2,BAG3,BLM,BNIP3,CDKN1A,CFLAR,DYRK1B,EIF2AK3,FKBP4,HBB,HEATR1,HIF1A,HSP90B1,HSPH1,IER3,INPP5B,MAPKAPK2,MED14,MICAL2,MTHFR,NAMPT,NOX4,PRKCI,PTPRN,RAD51D,SCD,SLC37A4,THBD,USP10,USP36,VTN,ZBTB16	34
Cellular Development,Connective Tissue Development and Function,Tissue Development	differentiation	Differentiation of connective tissue cells	0.000932	0.0285		-1.579	-1.606	ABL1,ADAMTS7,ARNTL,ATP2A2,BNIP3,CDKN1A,EIF2AK3,FAM20C,FBXW7,HIF1A,LPIN1,NAMPT,NCOR2,NOS3,NR1H4,OSBPL11,PIAS3,PPARD,Rorc,SCD,SLC2A5,STMN1,SUCO,TFRC,ZBTB16	25
Cancer,Gastrointestinal Disease,Organismal Injury and Abnormalities	pancreatobiliary tumor	Pancreatobiliary tumor	0.000938	0.0286				ABL1,ACSM5,ADAM11,ADAMTS7,ALS2,AOX1,ARNTL,BCAR3,BNIP3,C1S,CA14,CAMSAP2,CASP8AP2,CDKN1A,COL4A1,CRY2,EIF1AX,EIF2AK3,ELL2,ENPP2,ENTPD8,F11,FAM20C,FBXW7,FNIP2,GEMIN5,GRHPR,HIF1A,HLA-E,HPS4,HSP90B1,INSC,INTS2,IRX1,KCNH1,KIF1B,KLF3,KMT2C,LGALS9B,MDN1,MED14,MERTK,MYCBP2,MYO9B,NAB2,NCOR2,NDRG2,NHSL1,NOS3,PAPOLA,PCDH12,PGK1,PIAS3,PPFIBP2,PPME1,PTPRN,RBM14,RIBC1,SFXN1,SLC16A11,SLC20A1,SLC20A2,SLC2A5,SLC2A9…	82
Developmental Disorder	turning	Abnormal turning of embryo	0.000958	0.029				CDKN1A,CITED2,PLPP3,RAD51D,TEAD1,Wasl	6
Endocrine System Development and Function,Molecular Transport,Small Molecule Biochemistry	concentration	Concentration of hormone	0.000958	0.029		-1.259	-1.285	ADIPOR2,ANGPTL4,ARNTL,BAG3,CBS/CBSL,CDKN1A,EIF2AK3,FKBP4,GCK,IL1R1,Irs3,NOS3,NR1H4,SCD,TG,VAV2,ZBTB16	17
Organismal Injury and Abnormalities,Renal and Urological Disease	fibrosis	Fibrosis of kidney	0.000964	0.029		-1.033	-0.984	ATP1B1,Mt1,NOS3,NR1H4,SLC2A9,STMN1,VAV2	7
Cancer,Endocrine System Disorders,Organismal Injury and Abnormalities,Reproductive System Disease	adenosquamous ovarian cancer	Adenosquamous ovarian carcinoma	0.000965	0.029				ABCB9,ABL1,ADAMTS7,ALS2,DMXL2,ENPP2,FADS3,HEATR1,HLA-E,KMT2C,LGALS9B,LSG1,MAPKAPK2,MDC1,MDN1,MYCBP2,NCOR2,NHSL1,PAPOLA,PHLDB2,PRKCI,SOX13,SPHK2,STMN1,TARBP1,TG,THNSL1,WNK1,WWC3,ZNF436	30
Cancer,Organismal Injury and Abnormalities,Reproductive System Disease	uterine cancer	Uterine cancer	0.000975	0.0292				ABL1,AOX1,AQP9,AVPR1A,BLM,C1S,C6,CBS/CBSL,CC2D2A,CYP4F8,DMXL2,DNAJB5,DOT1L,DYRK1B,EIF1AX,ELL2,ENPP2,F11,FBXW7,FNIP2,FZD6,GEMIN5,GPR146,GRHPR,GYS2,HBB,HIF1A,HSP90B1,HSPH1,IDO2,IER3,IL1R1,INSC,IRX1,KDM4A,KIAA2026,KIF1B,KLF3,KMT2C,LGALS9B,LSG1,MDC1,MDN1,MED14,MICAL2,MYCBP2,NCOR2,NEDD9,NFIL3,NRBF2,PCDH12,PER3,PHLDB2,PIAS3,PNRC1,POU3F1,PPFIBP2,PRKCI,PYROXD2,RBM14,RHOBTB3,RNASE4,SFPQ,SLC20A1,SLC20A2,SL…	86
Organismal Functions	metabolism	Metabolism of mammalia	0.000986	0.0292				ARNTL,HIF1A,NOS3,PPARD,SCD	5
Cancer,Neurological Disease,Organismal Injury and Abnormalities	glioblastoma cancer	Glioblastoma	0.000988	0.0292				ABL1,ATP1B1,ATP2A2,CDKN1A,COL4A1,DMXL2,ENPP2,FBXW7,HSP90B1,IL1R1,KLF3,KMT2C,MERTK,MYCBP2,POU3F1,SLC20A1,ST8SIA1,TUBB2A	18
Cellular Movement	invasion	Invasion of tumor cell lines	0.000991	0.0292		-0.254	-0.343	ABL1,AFAP1L1,AGO2,ANGPTL4,BCAR3,CAMK2G,CDKN1A,CEMIP2,DNAJB4,ENPP2,ERC1,FBXW7,HIF1A,IPO7,IRX1,MAPKAPK2,MERTK,NAMPT,NDRG2,NEDD9,NOX4,NR1H4,PLEKHG6,PRKCI,SPHK2,ST8SIA1,STMN1,TEAD1,VAV2,VTN,YWHAG	31
Cancer,Dermatological Diseases and Conditions,Organismal Injury and Abnormalities	papilloma	Papilloma	0.00101	0.0292		0.975	0.985	ANGPTL2,ATP2A2,CDKN1A,NDRG2,PCDH12,PPARD,PRKCI,SCD	8
Cancer,Organismal Injury and Abnormalities	breast or pancreatic cancer	Breast or pancreatic cancer	0.00101	0.0292				ABCB9,ABL1,ACSM5,ADAM11,ADAMTS7,ADIPOR2,AGO2,ALS2,ANGPTL2,AOX1,ARNTL,BCAR3,BLM,BNIP3,CA14,CASP8AP2,CBS/CBSL,CC2D2A,CDC42EP1,CDKN1A,CFLAR,COL4A1,CRAT,CRY2,DMXL2,DOT1L,EFTUD2,EIF1AX,EIF2AK3,ELL2,ENPP2,ENTPD8,ERC1,F11,FADS3,FBXW7,FGD5,FNIP2,GCK,GEMIN5,GRHPR,H2BC10,HBB,HEATR1,HIF1A,HLA-E,HPS4,HSP90B1,IER3,INSC,INTS2,KIF1B,KLF3,KMT2C,LGALS9B,LSG1,MAPKAPK2,MCM10,MDC1,MDN1,MERTK,MICAL2,MTHFR,MYCBP2,MYO9…	119
Organismal Injury and Abnormalities	lysis	Lysis of fibrin clot	0.00102	0.0292				THBD,VTN	2
Gastrointestinal Disease	absorption	Abnormal absorption of mineral in intestine	0.00102	0.0292				Mt1,TFRC	2
Cellular Response to Therapeutics,Endocrine System Development and Function	insulin sensitivity	Insulin sensitivity of cells	0.00102	0.0292				SCD,SLC25A10	2
Carbohydrate Metabolism,Small Molecule Biochemistry	phosphorylation	Phosphorylation of D-glucose	0.00102	0.0292				G6PC,GCK	2
Lipid Metabolism,Small Molecule Biochemistry	metabolism	Metabolism of oleic acid	0.00102	0.0292				DBP,TEF	2
Cell Cycle	senescence	Senescence of stomach cancer cell lines	0.00102	0.0292				HIF1A,TEAD1	2
Developmental Disorder,Hereditary Disorder,Metabolic Disease,Organismal Injury and Abnormalities	cystinosis	Cystinosis	0.00102	0.0292				GSS,MTHFR	2
Cancer,Organismal Injury and Abnormalities,Reproductive System Disease	uterine tumor	Uterine tumor	0.00104	0.0298				ABL1,AOX1,AQP9,AVPR1A,BLM,C1S,C6,CBS/CBSL,CC2D2A,CRY2,CYP4F8,DMXL2,DNAJB5,DOT1L,DYRK1B,EIF1AX,ELL2,ENPP2,F11,FBXW7,FNIP2,FZD6,GEMIN5,GPR146,GRHPR,GYS2,HBB,HIF1A,HSP90B1,HSPH1,IDO2,IER3,IL1R1,INSC,IRX1,KDM4A,KIAA2026,KIF1B,KLF3,KMT2C,LGALS9B,LSG1,MDC1,MDN1,MED14,MICAL2,MYCBP2,NCOR2,NEDD9,NFIL3,NRBF2,PCDH12,PER3,PHLDB2,PIAS3,PNRC1,POU3F1,PPFIBP2,PRKCI,PYROXD2,RBM14,RHOBTB3,RNASE4,SFPQ,SLC20A1,SLC20…	89
Cellular Growth and Proliferation	accumulation	Accumulation of tumor cell lines	0.00107	0.0304		1.432	1.446	CDKN1A,DYRK1B,GADD45G,MCM10,TEAD1	5
Organismal Injury and Abnormalities,Respiratory Disease	edema	Edema of lung	0.00108	0.0307		0.391	0.419	ATP2A2,CA14,HIF1A,NOS3,VTN,Wasl	6
Behavior,Nervous System Development and Function	circadian rhythm	Circadian rhythm	0.0011	0.0312				ARNTL,CRY2,DBP,FBXW7,NAMPT,NR1D2,PER3,SFPQ	8
Cancer,Organismal Injury and Abnormalities	mixed neoplasia	Mixed neoplasia	0.00115	0.0323				ABCB9,ABL1,ADAMTS7,ALS2,CDC42EP1,CYP4F8,DMXL2,DOT1L,ENPP2,FADS3,FBXW7,FZD6,GYS2,HEATR1,HLA-E,HSP90B1,IL1R1,KIF1B,KMT2C,LGALS9B,LSG1,MAPKAPK2,MDC1,MDN1,MYCBP2,NCOR2,NHSL1,NRBF2,PAPOLA,PHLDB2,PRKCI,RHOBTB3,SFPQ,SOX13,SPHK2,STMN1,TARBP1,TG,THNSL1,TUBB2A,USP34,WNK1,WWC3,ZNF436	44
Cellular Development	differentiation	Differentiation of leukemia cell lines	0.0012	0.0336		-0.128	-0.145	ABL1,HIF1A,NCK1,NCOR2,PIAS3,SFPQ,ST8SIA1,THBD,ZBTB16	9
Cell Cycle	interphase	Interphase	0.0012	0.0336		0.218	0.188	ABL1,AMACR,BAG3,BLM,CAMK2G,CASP8AP2,CDKN1A,DOT1L,DYRK1B,EIF2AK3,GADD45G,HIF1A,IER3,Irs3,LPIN1,MCM10,MDC1,MRNIP,NOX4,PPME1,RBM14,SNX33,SPHK2,ST8SIA1,TFRC,USP36,YWHAG,ZBTB16	28
Digestive System Development and Function,Hepatic System Development and Function,Organ Morphology,Organismal Development	morphology	Morphology of liver	0.00122	0.0341				ABL1,ADIPOR2,AMACR,BAG3,CBS/CBSL,CDKN1A,F11,G6PC,IL1R1,MAT1A,Mt1,NOS3,NR1H4,SLC20A1,SLC37A4	15
Organ Morphology,Organismal Development,Renal and Urological System Development and Function	morphology	Morphology of renal tubule	0.00123	0.0342				CDKN1A,EHD3,G6PC,HIF1A,Mt1,NOS3,SLC2A9	7
Carbohydrate Metabolism	metabolism	Metabolism of carbohydrate	0.00126	0.0349		0.091	0.012	ALG12,ALG2,AQP9,AVPR1A,CEMIP2,ENPP2,G6PC,GCK,GYS2,HIF1A,LPIN1,MTMR4,NR1H4,PCDH12,PGK1,PIGL,PPARD,PXYLP1,SCD,SLC2A5,SLC35D2,SLC37A4,ST8SIA1,THBD,UAP1,UGP2	26
Endocrine System Disorders,Metabolic Disease,Organismal Injury and Abnormalities	insulin resistance	Insulin resistance	0.00127	0.0352		1.785	1.828	ADIPOR2,ATP2A2,CA14,CDKN1A,DYRK1B,GCK,IL1R1,Irs3,LPIN1,NOS3,NR1H4,PPARD,PRKCI,SCD,SLC45A3	15
Organismal Injury and Abnormalities,Renal and Urological Disease	urination disorder	Urination disorder	0.00128	0.0353		0.789	0.869	ANGPTL4,CBS/CBSL,CDKN1A,EHD3,HIF1A,LPIN1,Mocs1,Mt1,MTHFR,NOS3,NR1H4,SLC25A19,SLC2A9,THBD	14
Cellular Development,Connective Tissue Development and Function,Tissue Development	differentiation	Differentiation of adipocytes	0.00132	0.0363		-0.431	-0.438	ARNTL,BNIP3,EIF2AK3,FBXW7,LPIN1,NCOR2,NR1H4,OSBPL11,PPARD,Rorc,SCD,SLC2A5,ZBTB16	13
Cellular Function and Maintenance,Molecular Transport,Small Molecule Biochemistry	homeostasis	Homeostasis of Zn2+	0.00134	0.0363				Mt1,Mt1m/Mt2A,SLC39A10	3
Connective Tissue Development and Function,Nervous System Development and Function,Skeletal and Muscular System Development and Function	bone mineral density	Bone mineral density of vertebral column	0.00134	0.0363				BLM,NOS3,PPARD	3
Cell Death and Survival,Cellular Function and Maintenance	clearance	Clearance of leukocytes	0.00134	0.0363				CFLAR,MERTK,PPARD	3
Cellular Assembly and Organization	organization	Organization of organelle	0.00135	0.0364				ABL1,ALS2,ATP2A2,BLM,BNIP3,CDH17,EIF2AK3,FNIP2,HDAC11,HPS4,Krt10,LPIN1,NCK1,Pakap,PRKCI,RAB43,RAD51D,SEPTIN11,SFPQ,SNX33,TOR1A,USP36,VTN,Wasl	24
Cardiovascular Disease,Organismal Injury and Abnormalities	vaso-occlusion	Vaso-occlusion	0.00135	0.0364		0.415	0.394	ADAMTS7,ANGPTL4,ARNTL,ATP2A2,CA14,CBS/CBSL,CDKN1A,FGD5,GSS,IL1R1,MAPKAPK2,MERTK,MICAL2,MTHFR,NOS3,NR1H4,PPARD,SCD,THBD,TUBB2A,VTN	21
Cell Morphology,Cellular Assembly and Organization	morphology	Morphology of endosomes	0.00138	0.0369				ALS2,BACE1,RILP,Srsf5	4
Cancer,Organismal Injury and Abnormalities	endometrioid carcinoma	Endometrioid carcinoma	0.00138	0.0369				ABCB9,ABL1,ADAMTS7,ALS2,AQP9,AVPR1A,C1S,C6,CC2D2A,DMXL2,DNAJB5,DOT1L,DYRK1B,EIF1AX,ELL2,ENPP2,F11,FADS3,FBXW7,FNIP2,FZD6,GEMIN5,GPR146,HEATR1,HLA-E,HSP90B1,HSPH1,IDO2,INSC,IRX1,KDM4A,KIAA2026,KMT2C,LGALS9B,LSG1,MAPKAPK2,MDC1,MDN1,MED14,MICAL2,MYCBP2,NCOR2,NFIL3,NHSL1,PAPOLA,PCDH12,PER3,PHLDB2,PIAS3,POU3F1,PPFIBP2,PRKCI,PYROXD2,SLC20A1,SLC20A2,SLC38A4,SLC39A10,SLC45A3,SOX13,SPAG1,SPHK2,SRMS,STMN1,…	80
Hematological System Development and Function,Lymphoid Tissue Structure and Development,Tissue Morphology	morphology	Morphology of lymphoid tissue	0.00139	0.0372				ABL1,ANGPTL4,ARNTL,BAG3,BMF,CDH17,CDKN1A,CFLAR,CITED2,F11,HSP90B1,LGALS9B,MAPKAPK2,MERTK,Mt1,NR1H4,SLC37A4,SPHK2,UNG,Wasl,ZBTB16	21
Cardiovascular System Development and Function,Hematological System Development and Function	blood pressure	Blood pressure	0.0014	0.0374		-0.463	-0.45	ARNTL,ATP2A2,AVPR1A,DBP,DOT1L,GCH1,Hba-a2/Hba1,HIF1A,IER3,IL1R1,MTHFR,NOS3,TEF,VAV2	14
Cellular Development,Connective Tissue Development and Function	adipogenesis	Adipogenesis of cells	0.00141	0.0376		-1.87	-1.879	GYS2,LPIN1,MED14,NCOR2,PER3,PPARD,SFPQ	7
Hematological System Development and Function,Humoral Immune Response,Lymphoid Tissue Structure and Development,Tissue Morphology	quantity	Quantity of B lymphocytes	0.00143	0.0378		-0.674	-0.737	ABL1,ARNTL,AVPR1A,BMF,CDH17,CDKN1A,GADD45G,HIF1A,HSP90B1,KLF3,Mt1,NEDD9,SLC39A10,SPHK2,VAV2,Wasl	16
Lipid Metabolism,Small Molecule Biochemistry	binding	Binding of lipid	0.00144	0.0379		-1.706	-1.733	DNAJB1,FKBP4,NCOR2,NR1H4,STMN1,THBD	6
Cell Morphology,Digestive System Development and Function,Gastrointestinal Disease,Hepatic System Development and Function,Hepatic System Disease,Organ Morphology,Organismal Development,Organismal Injury and Abnormalities,Tissue Morphology	abnormal morphology	Abnormal morphology of hepatocytes	0.00144	0.0379				ABL1,CBS/CBSL,CDKN1A,Mt1,NOS3,NR1H4	6
Cancer,Endocrine System Disorders,Organismal Injury and Abnormalities,Reproductive System Disease	ovarian adenocarcinoma	Ovarian adenocarcinoma	0.00147	0.0385				ABCB9,ABL1,ADAMTS7,ADIPOR2,ALS2,BLM,CDKN1A,CRY2,DMXL2,EIF1AX,ENPP2,F11,FADS3,FBXW7,H2BC10,HEATR1,HLA-E,HSP90B1,KMT2C,LGALS9B,LSG1,MAPKAPK2,MCM10,MDC1,MDN1,MYCBP2,MYO9B,NCOR2,NHSL1,PAPOLA,PCDH12,PHLDB2,PLEKHG6,PRKCI,SOX13,SPHK2,STMN1,TARBP1,TG,THNSL1,TUBB2A,USP34,WNK1,WWC3,ZNF436	45
Cancer,Endocrine System Disorders,Organismal Injury and Abnormalities,Reproductive System Disease	epithelial ovarian tumor	Ovarian carcinoma	0.00149	0.039				ABCB9,ABL1,ADAMTS7,ADIPOR2,ALS2,BLM,CDKN1A,CFLAR,CRY2,DMXL2,EIF1AX,ENPP2,F11,FADS3,FBXW7,H2BC10,HEATR1,HLA-E,HSP90B1,KMT2C,LGALS9B,LSG1,MAPKAPK2,MCM10,MDC1,MDN1,MYCBP2,MYO9B,NCOR2,NHSL1,PAPOLA,PCDH12,PHLDB2,PLEKHG6,PPARD,PRKCI,SOX13,SPHK2,STMN1,TARBP1,TG,THNSL1,TUBB2A,USP34,WNK1,WWC3,ZNF436	47
Cancer,Organismal Injury and Abnormalities,Renal and Urological Disease	upper urinary tract transitional cell carcinoma	Upper urinary tract transitional cell carcinoma	0.00154	0.0402				CDKN1A,DOT1L,FBXW7,HSP90B1,TUBB2A	5
Embryonic Development,Organ Development,Organismal Development,Reproductive System Development and Function,Tissue Development	development	Development of vagina	0.00159	0.0412				BMF,CDKN1A,MERTK	3
Molecular Transport	accumulation	Accumulation of DNA	0.00159	0.0412				BLM,HIF1A,MAPKAPK2	3
Humoral Immune Response,Protein Synthesis	quantity	Quantity of immunoglobulin	0.0016	0.0413		-0.619	-0.621	ARNTL,AVPR1A,BLM,BMF,CDH17,CDKN1A,GADD45G,IL1R1,MERTK,Mt1,NFIL3,UNG,VAV2	13
Protein Synthesis	production	Production of protein	0.00164	0.0419		-0.95	-0.963	ARNTL,AVPR1A,BLM,BMF,CDH17,CDKN1A,GADD45G,HSP90B1,IL1R1,MERTK,Mt1,NFIL3,UNG,VAV2	14
Cellular Assembly and Organization	accumulation	Accumulation of cytoplasmic aggregates	0.00168	0.0419				DNAJB1,HPS4	2
Neurological Disease,Organismal Injury and Abnormalities	lethal encephalopathy	Lethal encephalopathy	0.00168	0.0419				DBP,TEF	2
Cellular Response to Therapeutics	5-fluorouracil sensitivity	5-fluorouracil sensitivity of stomach cancer cell lines	0.00168	0.0419				HIF1A,TEAD1	2
Organismal Injury and Abnormalities,Renal and Urological Disease	incidence	Incidence of renal lesion	0.00168	0.0419				FNIP2,HIF1A	2
Cell Cycle,DNA Replication, Recombination, and Repair	endoreduplication	Endoreduplication of DNA	0.00168	0.0419				CDKN1A,GADD45G	2
Lipid Metabolism,Molecular Transport,Small Molecule Biochemistry	depletion	Depletion of triacylglycerol	0.00168	0.0419				PPARD,SCD	2
Lipid Metabolism,Small Molecule Biochemistry	incorporation	Incorporation of ceramide	0.00168	0.0419				SCD,SPHK2	2
Lipid Metabolism,Small Molecule Biochemistry	metabolism	Metabolism of palmitic acid	0.00168	0.0419				DBP,TEF	2
Cellular Function and Maintenance,Hematological System Development and Function,Humoral Immune Response	homeostasis	Homeostasis of B-1 lymphocytes	0.00168	0.0419				ABL1,HIF1A	2
Cancer,Cellular Development,Cellular Growth and Proliferation,Hematological Disease,Organismal Injury and Abnormalities,Tumor Morphology	proliferation	Proliferation of chronic myelogenous leukemia cells	0.00168	0.0419				ABL1,IL1R1	2
Lipid Metabolism,Molecular Transport,Small Molecule Biochemistry	accumulation	Accumulation of oleic acid	0.00168	0.0419				PPARD,SCD	2
Molecular Transport	transport	Transport of anion	0.0017	0.0423				AQP9,CA14,HBB,SLC20A1,SLC20A2,SLC25A10,SLCO2B1,TG	8
Cancer,Neurological Disease,Organismal Injury and Abnormalities	neuroectodermal tumor	Neuroectodermal tumor	0.00171	0.0423				ABL1,CDKN1A,FBXW7,FCGR3A/FCGR3B,GEMIN5,HSP90B1,KIF1B,KMT2C,NDRG2,PGK1,POU3F1,TUBB2A	12
Endocrine System Disorders,Metabolic Disease,Organismal Injury and Abnormalities	impaired glucose tolerance	Impaired glucose tolerance	0.00177	0.0434		1.709	1.771	ADIPOR2,ANGPTL4,CBS/CBSL,CRY2,DNAJB9,GCK,NR1H4,PPARD	8
Molecular Transport	transport	Transport of carboxylic acid	0.00177	0.0434				AQP9,CA14,CPT1B,CRAT,PPARD,SLC25A10,SLCO2B1	7
Developmental Disorder,Embryonic Development,Organismal Development,Tissue Morphology	abnormal morphology	Abnormal morphology of vitelline vessel	0.00177	0.0434				CDKN1A,DOT1L,ENPP2,ERF,PLPP3,SLC20A1,TEAD1	7
Protein Synthesis	quantity	Quantity of alkaline phosphatase in blood	0.00185	0.0451		-1	-0.936	AMACR,FAM20C,Mt1,NOS3	4
Developmental Disorder	chorioallantoic membrane fusion failure	Chorioallantoic membrane fusion failure	0.00185	0.0451		-1.131	-1.048	ENPP2,ERF,PLPP3,TEAD1	4
Lipid Metabolism,Small Molecule Biochemistry	conversion	Conversion of phospholipid	0.00187	0.0454				ENPP2,INPP5B,NOX4	3
Endocrine System Development and Function,Molecular Transport,Protein Synthesis,Small Molecule Biochemistry	quantity	Quantity of insulin in blood	0.00189	0.0457		-1.609	-1.615	ADIPOR2,ARNTL,BAG3,EIF2AK3,GCK,IL1R1,Irs3,NOS3,NR1H4,SCD	10
Cell Morphology	orientation	Orientation of cells	0.00189	0.0457		-0.699	-0.782	ADIPOR2,AQP9,BCAR3,ENPP2,HIF1A,MAPKAPK2,MYO9B,NAMPT,PLEKHG6,PRKCI	10
Digestive System Development and Function,Gastrointestinal Disease,Hepatic System Development and Function,Hepatic System Disease,Organ Morphology,Organismal Development,Organismal Injury and Abnormalities	hepatomegaly	Hepatomegaly	0.00198	0.0477				AMACR,CBS/CBSL,G6PC,Mt1,NR1H4,SLC37A4	6
Connective Tissue Development and Function,Tissue Development	maturation	Maturation of connective tissue	0.00198	0.0477		-0.2	-0.24	ABL1,ALG2,CDKN1A,LPIN1,SUCO,TG	6
Cardiovascular Disease,Cardiovascular System Development and Function,Organ Morphology,Organismal Development,Organismal Injury and Abnormalities	abnormal morphology	Abnormal morphology of trabeculae carne	0.00202	0.0486				ABL1,CFLAR,HIF1A,TEAD1	4
Cancer,Organismal Injury and Abnormalities,Reproductive System Disease	carcinoma	Breast carcinoma	0.00205	0.0491				ABL1,ANGPTL2,AOX1,ARNTL,BCAR3,BLM,CBS/CBSL,CC2D2A,CDC42EP1,CDKN1A,CRAT,CRY2,DMXL2,DOT1L,EFTUD2,EIF1AX,EIF2AK3,ERC1,FBXW7,FGD5,GCK,HEATR1,HSP90B1,IER3,KIF1B,KMT2C,MCM10,MDC1,MICAL2,MYCBP2,NAB2,NCOR2,NDRG2,NHSL1,OSBPL11,PDHB,PRKCI,PTPRN,SLC20A1,SOX13,SPHK2,THNSL1,TUBB2A,UBE2G2,USP34,USP36,VILL,WNK1,ZNF436	49
Gene Expression	transcription	Transcription of DNA	0.00207	0.0494		-0.368	-0.422	ABL1,AGO2,ARNTL,BANP,BLM,CALCOCO1,CITED2,CRY2,DBP,DNAJB5,DYRK1B,ERF,FNIP2,Fus,FZD5,HIF1A,HSPH1,IRX1,KDM4A,Klf16,KLF3,LPIN1,MED14,NAB2,NAMPT,NCK1,NCOR2,NFIL3,NR1D2,NR1H4,NRBF2,PER3,PIAS3,POU3F1,PPARD,PTPRN,RBM14,Rorc,Rps6ka5,SFPQ,TARBP1,TEAD1,TEF,UBN1,Wasl,WWC3,ZBTB16,Zbtb21	48
Cellular Function and Maintenance,Molecular Transport,Small Molecule Biochemistry	homeostasis	Homeostasis of transition metal ion	0.00209	0.0496				ALAS2,HIF1A,Mt1,Mt1m/Mt2A,SLC39A10,TFRC	6
Cell Morphology	size	Size of cells	0.00211	0.05				ABL1,ALS2,ARNTL,BACE1,CBS/CBSL,CDKN1A,ENPP2,ERF,FBXW7,HIF1A,HSP90B1,IL1R1,LPIN1,NCOR2,NOS3,NOX4,NR1H4,PPARD,SEPTIN11,Srsf5,USP36	21
Cancer,Organismal Injury and Abnormalities,Renal and Urological Disease	urothelial neoplasm	Urothelial neoplasm	0.00211	0.05				AOX1,ATP1B1,BLM,CDKN1A,CFLAR,DOT1L,FBXW7,HSP90B1,KMT2C,MYCBP2,PCDH12,POU3F1,TSKU,TUBB2A	14
Organ Morphology,Reproductive System Development and Function	morphology	Morphology of placenta	0.00212	0.05				AGO2,ARNTL,CBS/CBSL,ENPP2,ERF,HSD17B2,PPARD,SLC20A1	8
Cardiovascular Disease,Hematological Disease,Metabolic Disease,Organismal Injury and Abnormalities	hypertriglyceridemia	Hypertriglyceridemia	0.00215	0.0505		0.068	0.077	ANGPTL4,NOS3,NR1H4,PPARD,SCD	5
Cell Death and Survival,Organismal Injury and Abnormalities,Renal and Urological Disease	necrosis	Necrosis of renal tubule	0.00215	0.0505		0.83	0.861	CDKN1A,HIF1A,Mt1,NOS3,STMN1	5
Connective Tissue Development and Function,Tissue Morphology	mass	Mass of mesenteric fat	0.00217	0.0507				IL1R1,Mt1,PPARD	3
Free Radical Scavenging	metabolism	Metabolism of superoxide	0.00217	0.0507				CBS/CBSL,CCS,NOX4	3
Connective Tissue Development and Function,Skeletal and Muscular System Development and Function,Tissue Development,Tissue Morphology	morphology	Morphology of epiphyseal growth plate	0.00219	0.051				FAM20C,G6PC,Mt1,NAB2,NOS3,SLC37A4	6
Developmental Disorder,Hereditary Disorder,Metabolic Disease,Organismal Injury and Abnormalities	glycogen storage disease	Glycogen storage disease	0.00221	0.0512				FCGR3A/FCGR3B,G6PC,GYS2,SLC37A4	4
Organ Morphology,Organismal Development,Organismal Injury and Abnormalities,Renal and Urological Disease,Renal and Urological System Development and Function	abnormal morphology	Abnormal morphology of proximal convoluted tubule	0.00221	0.0512				CDKN1A,EHD3,Mt1,NOS3	4
Cell Death and Survival	cell death	Cell death of lymphatic system cells	0.00222	0.0513		-0.713	-0.687	ABL1,BLM,BMF,CDKN1A,CFLAR,FBXW7,FCGR3A/FCGR3B,HIF1A,IER3,MERTK,Mt1,Rorc,SLC39A10,SPHK2,VAV2,YWHAG,ZBTB16	17
Cell Death and Survival	cell death	Cell death of fibroblasts	0.00223	0.0513		-0.639	-0.651	ABL1,BLM,BNIP3,CDKN1A,CFLAR,EIF2AK3,Mt1,NCK1,NOS3,RAD51D,SPHK2,UNG	12
Cancer,Organismal Injury and Abnormalities	cancer of unknown primary	Occult primary tumor	0.00228	0.0523				ABL1,DOT1L,HSP90B1,KMT2C,MDC1,MERTK,TUBB2A	7
Cell Morphology	polarization	Polarization of myeloid cells	0.00229	0.0524		-0.6	-0.653	ADIPOR2,AQP9,HIF1A,MYO9B,NAMPT	5
Cancer,Endocrine System Disorders,Organismal Injury and Abnormalities,Reproductive System Disease	gonadal tumor	Gonadal tumor	0.00233	0.0531				ABCB9,ABL1,ADAMTS7,ADIPOR2,ALS2,BLM,CDKN1A,CFLAR,COL4A1,CRY2,DMXL2,EIF1AX,ENPP2,F11,FADS3,FAM20C,FBXW7,G6PC,H2BC10,HEATR1,HLA-E,HSP90B1,KMT2C,LGALS9B,LSG1,MAPKAPK2,MCM10,MDC1,MDN1,MYCBP2,MYO9B,NCOR2,NDRG2,NHSL1,PAPOLA,PCDH12,PHLDB2,PLEKHG6,PPARD,PRKCI,RAD51D,SOX13,SPHK2,STMN1,TARBP1,TG,THNSL1,TUBB2A,USP34,VTN,WNK1,WWC3,ZNF436	53
Cell Death and Survival	apoptosis	Apoptosis of kidney	0.00237	0.0535		0.928	0.937	CDKN1A,EHD3,HIF1A,Mt1,NOS3,NR1H4,STMN1	7
Cardiovascular System Development and Function	vasoconstriction	Vasoconstriction	0.00237	0.0535		0.38	0.338	ABL1,ARNTL,AVPR1A,HIF1A,IL1R1,NOS3,NOX4	7
Hematological System Development and Function,Tissue Morphology	quantity	Quantity of myeloid cells	0.00241	0.0535		0.17	0.169	ABL1,ARNTL,BAG3,C6,CBS/CBSL,CDKN1A,CFLAR,F11,HBB,IL1R1,LGALS9B,MAPKAPK2,Mt1,NR1H4,PRKCI,SLC20A1,SLC37A4,TFRC,THBD,VTN,ZBTB16	21
Cancer,Immunological Disease,Organismal Injury and Abnormalities	thymus gland tumor	Thymus gland tumor	0.00242	0.0535				BLM,CDKN1A,HIF1A,HSP90B1,NCOR2,TUBB2A	6
Cellular Movement,Connective Tissue Development and Function	cell movement	Cell movement of fibroblast cell lines	0.00244	0.0535		0.845	0.776	ABL1,CDKN1A,CNN3,FBXW7,HIF1A,NCK1,NOX4,PPARD,VAV2,VTN	10
Lipid Metabolism,Molecular Transport,Small Molecule Biochemistry	concentration	Concentration of phospholipid	0.00244	0.0535		0.928	0.905	CBS/CBSL,ENPP2,HIF1A,INPP5B,NR1H4,NRBF2,PLPP3,RILP,SCD,VTN	10
Cellular Assembly and Organization,Cellular Function and Maintenance,Tissue Development	formation	Formation of actin filaments	0.00244	0.0535		-0.148	-0.211	ABL1,AVPR1A,CDKN1A,FBXW7,INPP5B,NCK1,NOX4,PHLDB2,PLEKHG6,PRKCI,STMN1,VAV2,VTN,Wasl	14
Cellular Movement,Connective Tissue Development and Function	migration	Migration of fibroblast cell lines	0.00244	0.0535		0.26	0.201	ABL1,CDKN1A,CNN3,FBXW7,NCK1,NOX4,PPARD,VTN	8
Organ Morphology	morphology	Morphology of gland	0.00247	0.0535				ANGPTL4,ARNTL,AVPR1A,CBS/CBSL,CDKN1A,CITED2,DNAJB9,EIF2AK3,FAM20C,FKBP4,GCK,IL1R1,Irs3,Mt1,PRKCI,TG,VAV2	17
Cell Death and Survival	apoptosis	Apoptosis of leukocytes	0.00247	0.0535		0.274	0.294	ABL1,BLM,BMF,CAMK2G,CDKN1A,CFLAR,FBXW7,FCGR3A/FCGR3B,G6PC,HIF1A,IER3,MERTK,Mt1,NAMPT,Rorc,SLC39A10,VTN,ZBTB16	18
Cell Death and Survival,Skeletal and Muscular System Development and Function	survival	Survival of myoblasts	0.0025	0.0535				CDKN1A,DYRK1B	2
Cardiovascular Disease,Hematological Disease,Metabolic Disease,Organismal Injury and Abnormalities	hyperlipidemia	Severe hyperlipidemia	0.0025	0.0535				ANGPTL4,SCD	2
Carbohydrate Metabolism,Molecular Transport,Small Molecule Biochemistry	transport	Transport of glucose-6-phosphate	0.0025	0.0535				G6PC,SLC37A4	2
Cellular Development,Embryonic Development,Hepatic System Development and Function,Organ Development,Organismal Development	maturation	Maturation of liver cells	0.0025	0.0535				ABL1,PPARD	2
Cardiovascular Disease	microaneurysm	Microaneurysm	0.0025	0.0535				CBS/CBSL,NOS3	2
Amino Acid Metabolism,Small Molecule Biochemistry	synthesis	Synthesis of citrulline	0.0025	0.0535				GCH1,NOS3	2
Cell-To-Cell Signaling and Interaction,Hematological System Development and Function	activation	Activation of T-cell hybrid cells	0.0025	0.0535				HSP90B1,TG	2
Cell Death and Survival,Cellular Function and Maintenance	clearance	Clearance of thymocytes	0.0025	0.0535				MERTK,PPARD	2
Cell Morphology	polarity	Polarity of hippocampal neurons	0.0025	0.0535				FZD5,PRKCI	2
Cellular Function and Maintenance	vesiculation	Vesiculation of hepatocytes	0.0025	0.0535				CDKN1A,EIF2AK3	2
Carbohydrate Metabolism,Small Molecule Biochemistry	metabolism	Metabolism of glucose-6-phosphate	0.0025	0.0535				G6PC,GCK	2
Cancer,Organismal Injury and Abnormalities	multiplicity	Multiplicity of benign tumor	0.0025	0.0535				MAPKAPK2,PRKCI	2
Organismal Injury and Abnormalities,Renal and Urological Disease,Tissue Morphology	quantity	Quantity of renal lesion	0.0025	0.0535				HIF1A,THBD	2
Protein Degradation,Protein Synthesis	stabilization	Stabilization of protein	0.00251	0.0535				ATP1B1,BAG3,CDKN1A,FBXW7,HPS4,INSC,NAA16,PER3,PLPP3,USP36	10
Cancer,Organismal Injury and Abnormalities	breast or colorectal cancer	Breast or colorectal cancer	0.00251	0.0535		-1.961	-1.967	ABL1,ADIPOR2,AFAP1L1,AGO2,ALAS2,ALG12,ALS2,AMACR,ANGPTL2,ANGPTL4,AOX1,AQP9,ARNTL,ATP2A2,AVPR1A,BACE1,BANP,BCAR3,BLM,CA14,CAMSAP2,CAPRIN1,CASP8AP2,CBS/CBSL,CC2D2A,CCS,CDC42EP1,CDH17,CDKN1A,CFLAR,CNTROB,COL4A1,CPT1B,CRAT,CRY2,CYP4F8,CYP8B1,DMXL2,DNAJB9,DOT1L,EFTUD2,EIF1AX,EIF2AK3,ENPP2,ERC1,FADS3,FBXW7,FCGR3A/FCGR3B,FGD5,FICD,FNIP2,GCH1,GCK,GSS,GYS2,HBB,HEATR1,HIF1A,HLA-E,HPS4,HSD17B2,HSP90B1,IER3,…	143
Cellular Assembly and Organization	development	Development of cytoplasm	0.00251	0.0535		-0.296	-0.364	ABL1,AVPR1A,BAG3,CAMSAP2,CDKN1A,ERP29,FBXW7,FKBP4,INPP5B,NCK1,NOS3,NOX4,Pakap,PHLDB2,PLEKHG6,PRKCI,STMN1,VAV2,VTN,Wasl	20
Cancer,Organismal Injury and Abnormalities	embryonal tumor	Embryonal tumor	0.00252	0.0536				ABL1,ATP1B1,ATP2A2,CDKN1A,COL4A1,DMXL2,ENPP2,FBXW7,FCGR3A/FCGR3B,GEMIN5,HSP90B1,IL1R1,KIF1B,KLF3,KMT2C,MERTK,MYCBP2,NDRG2,PGK1,POU3F1,SLC20A1,ST8SIA1,TUBB2A	23
Cell Death and Survival	cell death	Cell death of fibroblast cell lines	0.00255	0.0541		0.722	0.695	ABL1,ADIPOR2,BANP,BLM,BMF,BNIP3,CASP8AP2,CDKN1A,CFLAR,EIF2AK3,FKBP4,HIF1A,IER3,MDN1,Mt1,SPHK2,STMN1	17
Cellular Compromise,Lipid Metabolism,Small Molecule Biochemistry	peroxidation	Peroxidation of lipid	0.00259	0.0548		0.555	0.58	ANGPTL4,Mt1,NOX4,NR1H4,SCD	5
Cell Death and Survival	cell death	Cell death of thymocytes	0.00262	0.0549		-0.581	-0.588	ABL1,BLM,BMF,CDKN1A,CFLAR,HIF1A,Mt1,Rorc	8
Cardiovascular System Development and Function,Cellular Movement	migration	Migration of endothelial cells	0.00262	0.0549		0.831	0.765	ABL1,ANGPTL4,CBS/CBSL,CDC42EP1,COL4A1,HIF1A,MAPKAPK2,NCK1,NOS3,NOX4,PLPP3,TG,THBD,VAV2,VTN	15
Carbohydrate Metabolism	synthesis	Synthesis of carbohydrate	0.00263	0.0549		0.16	0.092	ALG12,ALG2,AQP9,AVPR1A,ENPP2,G6PC,GCK,GYS2,LPIN1,MTMR4,NR1H4,PIGL,PXYLP1,SCD,SLC35D2,SLC37A4,ST8SIA1,THBD,UAP1,UGP2	20
Molecular Transport	transport	Transport of transition metal ion	0.00263	0.0549				CCS,FKBP4,SFXN1,TFRC	4
Cell Death and Survival,Organismal Injury and Abnormalities,Renal and Urological Disease	apoptosis	Apoptosis of tubular cells	0.00263	0.0549		0.254	0.269	CDKN1A,HIF1A,Mt1,STMN1	4
Molecular Transport	quantity	Quantity of heavy metal	0.00267	0.0555		-1.213	-1.185	ALAS2,GCH1,Mt1,NEDD9,SLC39A10,TFRC	6
Cancer,Organismal Injury and Abnormalities,Reproductive System Disease	male genital neoplasm	Male genital neoplasm	0.00269	0.056				ABCB9,ABHD15,ABL1,ADAMTS7,AGO2,ALS2,AMACR,ANKS4B,AOX1,BACE1,BANP,BCAR3,C1S,C6,CASP8AP2,CBS/CBSL,CDC42EP1,CDH17,CDKN1A,CNTROB,COL4A1,CPT1B,CRAT,CYP4F8,DMXL2,DOT1L,EFTUD2,EHD3,EIF1AX,EIF2AK3,ERC1,F11,FAM20C,FBXW7,FCGR3A/FCGR3B,FGD5,FKBP4,G6PC,GCK,GPR146,GPRIN3,HDHD3,HEATR1,HIF1A,HSP90B1,HSPH1,IER3,INTS2,KCNH1,KDM4A,KMT2C,MCM10,MCMDC2,MDN1,MERTK,MFSD11,MICAL2,MTHFR,MTMR4,MYCBP2,NAB2,NCOR2,NDRG2,NHSL…	94
Lipid Metabolism,Small Molecule Biochemistry	synthesis	Synthesis of fatty acid	0.0027	0.056		-0.333	-0.41	ADIPOR2,ANGPTL4,AVPR1A,CAMK2G,HBB,HIF1A,NR1H4,PDHB,PPARD,PRKCI,SCD,SLC45A3,SPHK2,VTN	14
Cardiovascular Disease	occlusion	Occlusion of blood vessel	0.00271	0.056		0.785	0.767	ADAMTS7,ANGPTL4,ARNTL,ATP2A2,CA14,CBS/CBSL,CDKN1A,FGD5,GSS,IL1R1,MAPKAPK2,MERTK,MICAL2,MTHFR,NOS3,NR1H4,PPARD,SCD,THBD,TUBB2A	20
Carbohydrate Metabolism	uptake	Uptake of carbohydrate	0.00273	0.0562		0.425	0.377	AQP9,BACE1,CRAT,G6PC,GCK,HIF1A,NOS3,NOX4,NR1H4,PRKCI,SCD,SLC2A5,SLC37A4	13
Organismal Injury and Abnormalities,Reproductive System Development and Function,Reproductive System Disease	abnormal morphology	Abnormal morphology of reproductive system	0.00275	0.0565				AGO2,ARNTL,BLM,BMF,CBS/CBSL,CCS,CDKN1A,ENPP2,ERF,FKBP4,GADD45G,HSD17B2,INPP5B,Irs3,KLF3,MERTK,NOS3,PPARD,SLC20A1,ZBTB16	20
Cancer,Endocrine System Disorders,Organismal Injury and Abnormalities,Reproductive System Disease	ovarian cancer	Ovarian cancer	0.00278	0.057				ABCB9,ABL1,ADAMTS7,ADIPOR2,ALS2,BLM,CDKN1A,CFLAR,COL4A1,CRY2,DMXL2,EIF1AX,ENPP2,F11,FADS3,FBXW7,H2BC10,HEATR1,HLA-E,HSP90B1,KMT2C,LGALS9B,LSG1,MAPKAPK2,MCM10,MDC1,MDN1,MYCBP2,MYO9B,NCOR2,NHSL1,PAPOLA,PCDH12,PHLDB2,PLEKHG6,PPARD,PRKCI,RAD51D,SOX13,SPHK2,STMN1,TARBP1,TG,THNSL1,TUBB2A,USP34,VTN,WNK1,WWC3,ZNF436	50
Cancer,Organismal Injury and Abnormalities	metastatic adenocarcinoma	Metastatic adenocarcinoma	0.00281	0.0572				ABL1,HIF1A,HSP90B1,MERTK,Mt1,SCD,SRMS,TUBB2A	8
Developmental Disorder,Neurological Disease	neural tube defect	Neural tube defect	0.00281	0.0572		-0.055	0.043	CBS/CBSL,CITED2,CNN3,HSD17B2,MTHFR,SLC25A19,SPHK2,TEAD1	8
Cancer,Neurological Disease,Organismal Injury and Abnormalities	glioma cancer	Grade 3-4 glioma cancer	0.00281	0.0572				ABL1,AOX1,ATP2A2,BAG3,BMF,C6,CASP8AP2,CYP4F8,DNAJB1,FGD5,HIF1A,HLA-E,IL1R1,KMT2C,NCOR2,PAPOLA,PCDH12,SLC37A4,SLCO2B1,SPAG1,TUBB2A,USP36,VTN	23
Cancer,Hematological Disease,Immunological Disease,Organismal Injury and Abnormalities	aggressive NK-cell leukemia	Aggressive NK-cell leukemia	0.00288	0.0582				FBXW7,HSP90B1,UBN1	3
Connective Tissue Development and Function,Hematological System Development and Function,Lymphoid Tissue Structure and Development,Organismal Development,Tissue Morphology	quantity	Quantity of peripheral blood lymphocytes	0.00288	0.0582				BLM,NFIL3,Wasl	3
Neurological Disease,Organismal Injury and Abnormalities	gliosis	Gliosis of hippocampus	0.00288	0.0582				ALS2,BACE1,NAMPT	3
Cancer,Hematological Disease,Immunological Disease,Organismal Injury and Abnormalities	mature B-cell neoplasm	Mature B-cell neoplasm	0.00289	0.0582				ABL1,AMACR,ATP1B1,BMF,CDKN1A,CFLAR,CITED2,DMXL2,EIF2AK3,ERC1,FBXW7,FCGR3A/FCGR3B,GRHPR,HSP90B1,HSPH1,INSC,KLF3,KMT2C,LPIN1,MTMR4,NAMPT,NCOR2,NEDD9,PLEKHG6,PLPP3,PNRC1,POU3F1,PRKCI,RBM14,SRMS,TFRC,TMEM268,TSPAN12,TUBB2A,USP10,USP34,VTN,WDR91,WWC3,ZBTB16	40
Connective Tissue Development and Function	mass	Mass of fat pad	0.0029	0.0583		-0.797	-0.807	ARNTL,BAG3,CDKN1A,IL1R1,NR1H4,PPARD,SCD	7
Hereditary Disorder,Organismal Injury and Abnormalities,Renal and Urological Disease	hereditary renal tubular disorder	Hereditary renal tubular disorder	0.00292	0.0587				CA14,INPP5B,Mocs1,SLC2A9,WNK1	5
Organismal Injury and Abnormalities	injury	Injury of mice	0.00293	0.0587		1.342	1.331	C6,CAMK2G,FCGR3A/FCGR3B,Mt1,NDRG2,ZBTB16	6
Cancer,Neurological Disease,Organismal Injury and Abnormalities	brain astrocytoma	Brain astrocytoma	0.00298	0.0596				ABL1,AOX1,BAG3,BMF,C6,CASP8AP2,CYP4F8,DNAJB1,FGD5,HIF1A,HLA-E,IL1R1,KMT2C,NCOR2,PCDH12,SLC37A4,SLCO2B1,SPAG1,TUBB2A,USP36,VTN	21
Carbohydrate Metabolism	metabolism	Metabolism of polysaccharide	0.00301	0.0599		0.849	0.807	CEMIP2,G6PC,GCK,GYS2,NR1H4,PCDH12,PPARD,PXYLP1,SLC35D2,SLC37A4,THBD,UGP2	12
Cell Death and Survival,Organismal Injury and Abnormalities	necrosis	Necrosis of epithelial tissue	0.00302	0.0601		1.223	1.223	ABL1,BMF,BNIP3,CBS/CBSL,CDKN1A,CFLAR,CITED2,FKBP4,IER3,MAPKAPK2,NAMPT,NDRG2,NOS3,NR1H4,PPARD,PRKCI,SCD,SLC20A1,SPHK2,TFRC,THBD,VTN	22
Cancer,Neurological Disease,Organismal Injury and Abnormalities	brain tumor	Brain tumor	0.00305	0.0604				ABL1,AOX1,ATP2A2,BAG3,BMF,C6,CASP8AP2,CYP4F8,DNAJB1,FBXW7,FGD5,GEMIN5,HIF1A,HLA-E,HSP90B1,IL1R1,KMT2C,NCOR2,NDRG2,PAPOLA,PCDH12,SLC37A4,SLCO2B1,SPAG1,SRMS,THBD,TUBB2A,USP36,VTN	29
Cancer,Hematological Disease,Immunological Disease,Organismal Injury and Abnormalities	T-cell non-Hodgkin disease	T-cell non-Hodgkin lymphoma	0.00305	0.0604		-0.152	-0.106	ABL1,BMF,CDKN1A,CFLAR,COL4A1,HDAC11,HSP90B1,IER3,KMT2C,MERTK,NDRG2,RHOBTB3,STMN1,THBD,TUBB2A,USP10,VAV2,VTN	18
Organismal Survival	survival	Survival of organism	0.00306	0.0604		1.106	1.049	ABL1,ANGPTL2,AQP9,BLM,CDKN1A,DOT1L,EIF2AK3,F11,FBXW7,FCGR3A/FCGR3B,FZD5,HIF1A,HSP90B1,IL1R1,KLF3,MAPKAPK2,Mt1,MTHFR,NDRG2,NFIL3,NOS3,NR1H4,PIAS3,PPARD,SLC39A10,THBD,Wasl	27
Cell Death and Survival	apoptosis	Apoptosis of blood cells	0.00309	0.0604		0.524	0.554	ABL1,BLM,BMF,CAMK2G,CDKN1A,CFLAR,DOT1L,FBXW7,FCGR3A/FCGR3B,G6PC,HIF1A,IER3,MERTK,Mt1,NAMPT,Rorc,SLC39A10,VTN,ZBTB16	19
Embryonic Development,Tissue Morphology	remodeling	Remodeling of vitelline vessel	0.0031	0.0604				FBXW7,FZD5,HIF1A,PLPP3	4
Cardiovascular Disease,Organismal Injury and Abnormalities	embolus	Embolus	0.0031	0.0604				MERTK,MTHFR,PPARD,VTN	4
Cell Morphology	polarization	Polarization of phagocytes	0.0031	0.0604		-0.6	-0.656	ADIPOR2,AQP9,HIF1A,MYO9B,NAMPT	5
Cellular Movement	invasion	Invasion of breast cancer cell lines	0.0031	0.0604		0.925	0.863	ABL1,ANGPTL4,BCAR3,CDKN1A,CEMIP2,ERC1,HIF1A,NAMPT,NOX4,PLEKHG6,STMN1,VAV2,VTN,YWHAG	14
Cancer,Organismal Injury and Abnormalities,Reproductive System Disease	malignant neoplasm of male genital organ	Malignant neoplasm of male genital organ	0.0031	0.0604				ABCB9,ABHD15,ABL1,ADAMTS7,AGO2,ALS2,AMACR,ANKS4B,AOX1,BACE1,BANP,BCAR3,C1S,C6,CASP8AP2,CBS/CBSL,CDC42EP1,CDH17,CDKN1A,CNTROB,COL4A1,CPT1B,CRAT,CYP4F8,DMXL2,DOT1L,EFTUD2,EHD3,EIF1AX,EIF2AK3,ERC1,F11,FAM20C,FBXW7,FCGR3A/FCGR3B,FGD5,FKBP4,G6PC,GCK,GPR146,GPRIN3,HDHD3,HEATR1,HIF1A,HSP90B1,HSPH1,IER3,INTS2,KCNH1,KDM4A,KMT2C,MCM10,MCMDC2,MDN1,MERTK,MFSD11,MICAL2,MTHFR,MTMR4,MYCBP2,NAB2,NCOR2,NHSL1,PAPO…	93
Cancer,Organismal Injury and Abnormalities,Reproductive System Disease	prostate cancer	Prostate cancer	0.00311	0.0605				ABCB9,ABHD15,ABL1,ADAMTS7,AGO2,ALS2,AMACR,ANKS4B,AOX1,BACE1,BANP,BCAR3,C1S,C6,CASP8AP2,CBS/CBSL,CDC42EP1,CDH17,CDKN1A,CNTROB,COL4A1,CPT1B,CRAT,CYP4F8,DMXL2,DOT1L,EFTUD2,EHD3,EIF1AX,EIF2AK3,ERC1,F11,FBXW7,FCGR3A/FCGR3B,FGD5,FKBP4,G6PC,GCK,GPR146,GPRIN3,HDHD3,HEATR1,HIF1A,HSP90B1,HSPH1,IER3,INTS2,KCNH1,KDM4A,KMT2C,MCM10,MCMDC2,MDN1,MERTK,MFSD11,MICAL2,MTHFR,MTMR4,MYCBP2,NAB2,NCOR2,NHSL1,PAPOLA,PGK1…	92
Cancer,Organismal Injury and Abnormalities	mediastinal neoplasm	Mediastinal neoplasm	0.00313	0.0606				BLM,CDKN1A,HIF1A,HSP90B1,KCNH1,NCOR2,TUBB2A	7
Cardiovascular System Development and Function	morphology	Morphology of vessel	0.00316	0.061				ABL1,ANGPTL4,CBS/CBSL,CITED2,EHD3,ENPP2,FBXW7,HIF1A,MERTK,MTHFR,NOS3,SPHK2,VAV2,VTN	14
Cell Death and Survival	cell death	Cell death of breast cancer cell lines	0.00316	0.061		0.826	0.834	ABL1,BAG3,BNIP3,CDKN1A,CFLAR,ENPP2,HIF1A,IER3,NEDD9,NFIL3,NOS3,SNX33,SPHK2,STMN1,TFRC	15
Protein Degradation,Protein Synthesis	catabolism	Catabolism of protein	0.0032	0.0616		1.3	1.251	ADAMTS7,ARNTL,ATP1B1,BACE1,BAG3,BANP,C1S,CDKN1A,F11,FBXW7,HPS4,HSP90B1,IER3,INSC,MYCBP2,NAA16,PER3,PLPP3,PPARD,RILP,UBE2G2,USP36,VTN	23
Cancer,Organismal Injury and Abnormalities	carcinoma of unknown primary	Carcinoma of unknown primary	0.00321	0.0617				ABL1,DOT1L,HSP90B1,KMT2C,MDC1,TUBB2A	6
Free Radical Scavenging,Small Molecule Biochemistry	metabolism	Metabolism of hydrogen peroxide	0.00325	0.0623		1.487	1.451	FCGR3A/FCGR3B,Hba-a2/Hba1,HBB,NOS3,NOX4,TFRC,TG	7
Hematological System Development and Function,Hypersensitivity Response,Tissue Morphology	quantity	Quantity of basophils	0.00328	0.0623				ARNTL,C6,CDKN1A	3
Organismal Injury and Abnormalities,Renal and Urological Disease	degeneration	Degeneration of kidney	0.00328	0.0623				HSD17B2,Mt1,NOS3	3
Cardiovascular System Development and Function,Hematological System Development and Function	pressure	Pressure of artery	0.00328	0.0623				ARNTL,ATP2A2,NOS3	3
Cardiovascular System Development and Function,Hematological System Development and Function	diastolic pressure	Diastolic pressure	0.00328	0.0623				ATP2A2,DOT1L,HIF1A,MTHFR,NOS3	5
Cardiovascular Disease,Neurological Disease,Organismal Injury and Abnormalities	cerebrovascular dysfunction	Cerebrovascular dysfunction	0.00329	0.0623		1.195	1.206	CA14,COL4A1,F11,HIF1A,HSPH1,IL1R1,MAT1A,MTHFR,NOS3,NOX4,THBD,TUBB2A,UNG	13
Cellular Development,Cellular Growth and Proliferation,Embryonic Development,Hematological System Development and Function,Hematopoiesis,Lymphoid Tissue Structure and Development,Organ Development,Organismal Development,Tissue Development	lymphopoiesis	Lymphopoiesis	0.00331	0.0626		-1.115	-1.187	ABL1,ARNTL,AVPR1A,BLM,CDH17,CDKN1A,CFLAR,DNAJB1,DNAJB9,EIF2AK3,Fus,FZD5,GADD45G,HIF1A,HSP90B1,IL1R1,KLF3,LGALS9B,MERTK,NFIL3,Rorc,VAV2,Wasl,ZBTB16	24
Molecular Transport	uptake	Uptake of anion	0.00335	0.0632		1.103	1.065	AQP9,NR1H4,SLC20A2,SLC37A4	4
Free Radical Scavenging	production	Production of superoxide	0.00338	0.0635		0.894	0.868	ABL1,CBS/CBSL,FCGR3A/FCGR3B,GCH1,HBB,NOS3,NOX4	7
Cancer,Organismal Injury and Abnormalities,Reproductive System Disease	breast cancer	Breast cancer	0.00342	0.0636				ABL1,AGO2,ANGPTL2,AOX1,ARNTL,BCAR3,BLM,CBS/CBSL,CC2D2A,CDC42EP1,CDKN1A,CRAT,CRY2,DMXL2,DOT1L,EFTUD2,EIF1AX,EIF2AK3,ERC1,FBXW7,FGD5,GCK,HBB,HEATR1,HIF1A,HSP90B1,IER3,KIF1B,KLF3,KMT2C,MAPKAPK2,MCM10,MDC1,MICAL2,MTHFR,MYCBP2,NAB2,NAMPT,NCOR2,NDRG2,NFIL3,NHSL1,NOS3,OSBPL11,PDHB,PGK1,PNRC1,PRKCI,PTPRN,SFPQ,SLC20A1,SOX13,SPHK2,STMN1,THNSL1,TUBB2A,UBE2G2,USP34,USP36,VILL,WNK1,YPEL5,ZNF436	63
Cardiovascular Disease,Organismal Injury and Abnormalities,Tissue Morphology	size	Size of infarct	0.00344	0.0636				BNIP3,F11,HIF1A,HSPH1,MAPKAPK2,NAMPT,NOX4,THBD,UNG	9
Carbohydrate Metabolism	deposition	Deposition of glycogen	0.00347	0.0636				HIF1A,PPARD	2
Neurological Disease,Organismal Injury and Abnormalities	gliosis	Gliosis of hippocampal CA1 region	0.00347	0.0636				BACE1,NAMPT	2
Lipid Metabolism,Molecular Transport,Small Molecule Biochemistry	quantity	Quantity of palmitoleic acid	0.00347	0.0636				G6PC,SCD	2
Cancer,Gastrointestinal Disease,Organismal Injury and Abnormalities,Tissue Morphology,Tumor Morphology	size	Size of intestinal tumor	0.00347	0.0636				MAPKAPK2,PRKCI	2
Connective Tissue Disorders,Organismal Injury and Abnormalities,Skeletal and Muscular Disorders,Tissue Morphology	abnormal morphology	Abnormal morphology of superficial fascia	0.00347	0.0636				CBS/CBSL,PPARD	2
Cellular Compromise,Cellular Function and Maintenance	endoplasmic reticulum stress response	Endoplasmic reticulum stress response of hepatoma cell lines	0.00347	0.0636				ATP2A2,HSP90B1	2
Cancer,Organismal Injury and Abnormalities,Skeletal and Muscular Disorders	development	Development of rhabdomyosarcoma	0.00347	0.0636				BLM,CDKN1A	2
Organismal Injury and Abnormalities,Renal and Urological Disease	mesangiolysis	Mesangiolysis	0.00347	0.0636				EHD3,NOS3	2
Cell Morphology,Cellular Movement,Hematological System Development and Function,Immune Cell Trafficking,Inflammatory Response	cell spreading	Cell spreading of macrophages	0.00347	0.0636				MYO9B,VTN	2
Cell Death and Survival	cell death	Cell death of fibrosarcoma cell lines	0.00347	0.0636		-1.406	-1.411	CASP8AP2,CDKN1A,CFLAR,HIF1A,NAMPT	5
Tissue Development	accumulation	Accumulation of cells	0.00348	0.0636		0.852	0.829	ABL1,BMF,C6,CBS/CBSL,CDKN1A,DOT1L,ENPP2,FCGR3A/FCGR3B,IER3,IL1R1,MERTK,PPARD,THBD,ZBTB16	14
Cancer,Organismal Injury and Abnormalities,Reproductive System Disease	endometrial carcinoma	Endometrial carcinoma	0.00349	0.0637				ABL1,AOX1,AQP9,AVPR1A,BLM,C1S,C6,CC2D2A,CYP4F8,DMXL2,DNAJB5,DOT1L,DYRK1B,EIF1AX,ELL2,ENPP2,F11,FBXW7,FNIP2,FZD6,GEMIN5,GPR146,GYS2,HSP90B1,HSPH1,IDO2,IL1R1,INSC,IRX1,KDM4A,KIAA2026,KIF1B,KMT2C,LGALS9B,LSG1,MDC1,MDN1,MED14,MICAL2,MYCBP2,NCOR2,NFIL3,NRBF2,PCDH12,PER3,PHLDB2,PIAS3,POU3F1,PPFIBP2,PRKCI,PYROXD2,RHOBTB3,SFPQ,SLC20A1,SLC20A2,SLC38A4,SLC39A10,SLC45A3,SPAG1,SRMS,SUCO,TECPR2,TG,THBD,THNSL1…	74
Cardiovascular Disease,Connective Tissue Disorders,Hematological Disease,Hereditary Disorder,Organismal Injury and Abnormalities	sickle cell anemia	Sickle cell anemia	0.00352	0.064				ATP1B1,GRHPR,GSS,HBB,HIF1A,POU3F1	6
Cell Death and Survival,Organismal Injury and Abnormalities	cell death	Cell death of epithelial cells	0.00353	0.064		1.109	1.1	BMF,BNIP3,CBS/CBSL,CDKN1A,CFLAR,CITED2,FKBP4,IER3,MAPKAPK2,NAMPT,NDRG2,NR1H4,PPARD,PRKCI,SCD,SLC20A1,SPHK2,TFRC,VTN	19
Cancer,Organismal Injury and Abnormalities,Reproductive System Disease	breast or ovarian cancer	Breast or ovarian cancer	0.00354	0.064				ABCB9,ABL1,ADAMTS7,ADIPOR2,AGO2,ALS2,ANGPTL2,AOX1,ARNTL,BCAR3,BLM,CBS/CBSL,CC2D2A,CDC42EP1,CDKN1A,CFLAR,COL4A1,CRAT,CRY2,DMXL2,DOT1L,EFTUD2,EIF1AX,EIF2AK3,ENPP2,ERC1,F11,FADS3,FBXW7,FGD5,GCK,H2BC10,HBB,HEATR1,HIF1A,HLA-E,HSP90B1,IER3,KIF1B,KLF3,KMT2C,LGALS9B,LSG1,MAPKAPK2,MCM10,MDC1,MDN1,MICAL2,MTHFR,MYCBP2,MYO9B,NAB2,NAMPT,NCOR2,NDRG2,NFIL3,NHSL1,NOS3,OSBPL11,PAPOLA,PCDH12,PDHB,PGK1,PHLDB2,PLEKH…	88
Cancer,Organismal Injury and Abnormalities,Reproductive System Disease	uterine carcinoma	Uterine carcinoma	0.00354	0.064				ABL1,AOX1,AQP9,AVPR1A,BLM,C1S,C6,CC2D2A,CYP4F8,DMXL2,DNAJB5,DOT1L,DYRK1B,EIF1AX,ELL2,ENPP2,F11,FBXW7,FNIP2,FZD6,GEMIN5,GPR146,GYS2,HSP90B1,HSPH1,IDO2,IER3,IL1R1,INSC,IRX1,KDM4A,KIAA2026,KIF1B,KMT2C,LGALS9B,LSG1,MDC1,MDN1,MED14,MICAL2,MYCBP2,NCOR2,NEDD9,NFIL3,NRBF2,PCDH12,PER3,PHLDB2,PIAS3,PNRC1,POU3F1,PPFIBP2,PRKCI,PYROXD2,RBM14,RHOBTB3,SFPQ,SLC20A1,SLC20A2,SLC38A4,SLC39A10,SLC45A3,SPAG1,SRMS,SUC…	78
Cardiovascular Disease,Organismal Injury and Abnormalities	abnormality	Abnormality of heart ventricle	0.00357	0.0644		0.751	0.778	ABL1,ANGPTL4,ATP2A2,BAG3,BNIP3,CA14,CDKN1A,CFLAR,CITED2,HIF1A,IER3,NCOR2,NOS3,SLC20A1,TEAD1,VAV2	16
Cancer,Organismal Injury and Abnormalities,Reproductive System Disease	mammary tumor	Mammary tumor	0.00359	0.0646		0.776	0.761	ABL1,AGO2,ANGPTL2,AOX1,ARNTL,BCAR3,BLM,CBS/CBSL,CC2D2A,CDC42EP1,CDKN1A,CRAT,CRY2,DMXL2,DOT1L,EFTUD2,EIF1AX,EIF2AK3,ERC1,FBXW7,FGD5,GCH1,GCK,HBB,HEATR1,HIF1A,HSP90B1,IER3,KIF1B,KLF3,KMT2C,MAPKAPK2,MCM10,MDC1,MICAL2,MTHFR,MYCBP2,NAB2,NAMPT,NCOR2,NDRG2,NEDD9,NFIL3,NHSL1,NOS3,OSBPL11,PDHB,PGK1,PNRC1,PRKCI,PTPRN,SFPQ,SLC20A1,SOX13,SPHK2,STMN1,THNSL1,TUBB2A,UBE2G2,USP34,USP36,VAV2,VILL,WNK1,YPEL5,ZNF436	66
Developmental Disorder,Hereditary Disorder,Metabolic Disease,Organismal Injury and Abnormalities,Renal and Urological Disease	inborn error renal tubular transport	Inborn error renal tubular transport	0.00362	0.0649				CA14,INPP5B,Mocs1,WNK1	4
Organ Morphology,Organismal Development,Organismal Injury and Abnormalities,Renal and Urological Disease,Renal and Urological System Development and Function	hypertrophy	Hypertrophy of kidney	0.00362	0.0649				EHD3,HSD17B2,NOS3,NOX4	4
Cancer,Organismal Injury and Abnormalities,Reproductive System Disease	endometrial cancer	Endometrial cancer	0.00363	0.0649				ABL1,AOX1,AQP9,AVPR1A,BLM,C1S,C6,CBS/CBSL,CC2D2A,CYP4F8,DMXL2,DNAJB5,DOT1L,DYRK1B,EIF1AX,ELL2,ENPP2,F11,FBXW7,FNIP2,FZD6,GEMIN5,GPR146,GYS2,HBB,HSP90B1,HSPH1,IDO2,IL1R1,INSC,IRX1,KDM4A,KIAA2026,KIF1B,KMT2C,LGALS9B,LSG1,MDC1,MDN1,MED14,MICAL2,MYCBP2,NCOR2,NFIL3,NRBF2,PCDH12,PER3,PHLDB2,PIAS3,POU3F1,PPFIBP2,PRKCI,PYROXD2,RHOBTB3,RNASE4,SFPQ,SLC20A1,SLC20A2,SLC38A4,SLC39A10,SLC45A3,SPAG1,SRMS,SUCO,T…	78
Cell Death and Survival,Connective Tissue Development and Function	cell viability	Cell viability of fibroblast cell lines	0.00364	0.0649		0.246	0.199	ABL1,BLM,CDKN1A,EIF2AK3,MDC1,Mt1,UNG	7
Cellular Development,Cellular Growth and Proliferation,Hematological System Development and Function,Lymphoid Tissue Structure and Development	cell proliferation	Cell proliferation of T lymphocytes	0.0037	0.0657		-0.1	-0.146	ABL1,AMACR,BLM,CBS/CBSL,CDKN1A,CFLAR,EHD3,GCH1,HIF1A,HLA-E,HSP90B1,IL1R1,LGALS9B,MERTK,NCK1,NCOR2,SOX13,SPHK2,ST8SIA1,TFRC,TG,ZBTB16	22
Cardiovascular System Development and Function,Cellular Function and Maintenance,Tissue Development	function	Function of vascular endothelial cells	0.00371	0.0657				CBS/CBSL,NOS3,VAV2	3
Amino Acid Metabolism,Molecular Transport,Small Molecule Biochemistry	quantity	Quantity of homocysteine	0.00371	0.0657				CBS/CBSL,MTHFR,NOX4	3
Connective Tissue Development and Function,Tissue Morphology	mass	Mass of brown adipose tissue	0.00371	0.0657				ADIPOR2,ANGPTL4,ENPP2	3
Cardiovascular Disease,Organismal Injury and Abnormalities	dysfunction	Dysfunction of heart	0.00373	0.0659		-1.213	-1.204	ANGPTL4,ATP2A2,BAG3,BNIP3,IER3,NOS3,NOX4,PPARD,SCD,VAV2	10
Cell Morphology,Connective Tissue Development and Function,Tissue Morphology	size	Size of adipocytes	0.00377	0.0665				ARNTL,CDKN1A,ENPP2,LPIN1,NCOR2,NR1H4,PPARD	7
Embryonic Development,Organismal Development	development	Development of abdomen	0.0038	0.0667		1.314	1.268	ABL1,ARNTL,BMF,CDH17,CDKN1A,CFLAR,CITED2,EHD3,EIF2AK3,FKBP4,G6PC,GADD45G,HBB,HIF1A,HSD17B2,IRX1,MERTK,NFIL3,NOS3,PPARD,PTPRN,SLC20A1	22
Cardiovascular System Development and Function,Hematological System Development and Function	mean arterial pressure	Mean arterial pressure	0.00384	0.0673		0.149	0.159	ARNTL,ATP2A2,DBP,NOS3,TEF,VAV2	6
Cancer,Organismal Injury and Abnormalities	grade 3-4 tumor	Grade 3-4 tumor	0.00385	0.0674				ABL1,AOX1,ATP2A2,BAG3,BMF,C6,CASP8AP2,CYP4F8,DNAJB1,FGD5,HIF1A,HLA-E,HSP90B1,IL1R1,KMT2C,NCOR2,PAPOLA,PCDH12,SLC37A4,SLCO2B1,SPAG1,TUBB2A,USP36,VTN	24
Cell Morphology,Connective Tissue Development and Function,Tissue Morphology	morphology	Morphology of adipocytes	0.00389	0.068				ARNTL,CDKN1A,ENPP2,LPIN1,Mt1,NCOR2,NR1H4,PPARD	8
Cellular Development,Cellular Growth and Proliferation,Hematological System Development and Function,Hematopoiesis,Lymphoid Tissue Structure and Development,Tissue Development	hematopoiesis	Hematopoiesis of mononuclear leukocytes	0.00398	0.0694		-0.872	-0.943	ABL1,ARNTL,AVPR1A,BLM,CDH17,CDKN1A,CFLAR,DNAJB1,DNAJB9,EIF2AK3,Fus,FZD5,GADD45G,HIF1A,HSP90B1,IL1R1,KLF3,LGALS9B,MERTK,NFIL3,Rorc,ST8SIA1,VAV2,Wasl,ZBTB16	25
Carbohydrate Metabolism,Small Molecule Biochemistry	synthesis	Synthesis of D-glucose	0.00401	0.0697		0.849	0.826	AQP9,AVPR1A,GCK,NR1H4,SCD,SLC37A4	6
Organ Morphology,Organismal Development,Renal and Urological System Development and Function	morphology	Morphology of kidney	0.00403	0.0699				ANGPTL4,ARNTL,CDKN1A,EHD3,G6PC,HIF1A,HSD17B2,KCNH1,Mt1,NOS3,NOX4,SLC2A9,SLC37A4	13
Cancer,Endocrine System Disorders,Organismal Injury and Abnormalities	extrapancreatic neuroendocrine tumor	Extrapancreatic neuroendocrine tumor	0.00403	0.0699				ABL1,CAMSAP2,CASP8AP2,CDKN1A,DOT1L,EIF1AX,EIF2AK3,FBXW7,GRHPR,HSP90B1,KIF1B,KMT2C,MDC1,MERTK,MYCBP2,NCOR2,NHSL1,RAD51D,TUBB2A,UBE2G2,UGGT1,VTN,ZNF436	23
Cell Death and Survival,Embryonic Development	cell death	Cell death of embryonic cell lines	0.00406	0.0702		0.761	0.726	ABL1,ADIPOR2,BANP,BNIP3,CDKN1A,CFLAR,CITED2,EIF2AK3,FKBP4,HIF1A,IER3,NAMPT,PPARD,TFRC,VTN	15
Cell Death and Survival	cell death	Cell death of cervical cancer cell lines	0.00413	0.0705		1.257	1.273	ABL1,ACSM5,ATP2A2,CASP8AP2,CDKN1A,CFLAR,EIF2AK3,GADD45G,HIF1A,IER3,MCM10,NDRG2,NEDD9,SCD,SNX33	15
Cell Death and Survival	cell death	Neuronal cell death	0.00414	0.0705		1.851	1.861	ABL1,ALS2,BACE1,BNIP3,CAPRIN1,CDKN1A,CFLAR,EIF2AK3,FBXW7,Fus,HIF1A,HSPH1,IL1R1,KIF1B,Mt1,NDRG2,NFIL3,NOS3,NOX4,PPARD,PRKCI,SLC25A10,ST8SIA1,UNG	24
Cell Death and Survival	apoptosis	Apoptosis of T lymphocytes	0.00417	0.0705		-0.527	-0.516	ABL1,BLM,BMF,CDKN1A,CFLAR,FBXW7,HIF1A,IER3,MERTK,Mt1,Rorc,ZBTB16	12
Neurological Disease,Organismal Injury and Abnormalities	brain lesion	Brain lesion	0.00417	0.0705				ABL1,AOX1,ATP2A2,BAG3,BMF,C6,CASP8AP2,CYP4F8,DNAJB1,FBXW7,FGD5,GEMIN5,HIF1A,HLA-E,HSP90B1,IL1R1,KMT2C,MTHFR,NCOR2,NDRG2,NOX4,PAPOLA,PCDH12,SLC37A4,SLCO2B1,SPAG1,SRMS,THBD,TUBB2A,USP36,VTN	31
Hematological System Development and Function,Inflammatory Response,Tissue Morphology	quantity	Quantity of phagocytes	0.00418	0.0705		0.966	0.949	ABL1,ARNTL,BAG3,C6,CBS/CBSL,CDKN1A,CFLAR,F11,IL1R1,LGALS9B,MAPKAPK2,Mt1,NR1H4,PRKCI,SLC37A4,THBD,VTN	17
Molecular Transport	transport	Transport of phosphate	0.00418	0.0705				SLC20A1,SLC20A2,SLC25A10	3
Cell Death and Survival	apoptosis	Apoptosis of mesothelioma cell lines	0.00418	0.0705				CFLAR,PIAS3,ZBTB16	3
Cardiovascular System Development and Function,Cellular Movement	chemotaxis	Chemotaxis of vascular endothelial cells	0.00418	0.0705				ENPP2,THBD,WNK1	3
Cancer,Organismal Injury and Abnormalities,Reproductive System Disease	endometrial undifferentiated carcinoma	Endometrial undifferentiated carcinoma	0.00418	0.0705				FBXW7,HSP90B1,TUBB2A	3
Organ Development,Reproductive System Development and Function	function	Function of uterus	0.00418	0.0705				CBS/CBSL,FKBP4,HLA-E	3
Cancer,Neurological Disease,Organismal Injury and Abnormalities	supratentorial primitive neuroectodermal tumor	Supratentorial primitive neuroectodermal tumor	0.00418	0.0705				ABL1,HSP90B1,TUBB2A	3
Cancer,Organismal Injury and Abnormalities,Skeletal and Muscular Disorders	hyperplasia	Hyperplasia of smooth muscle	0.00418	0.0705				ARNTL,NOS3,VAV2	3
Reproductive System Development and Function	decidualization	Decidualization	0.0042	0.0705				CITED2,FKBP4,PPARD,SPHK2	4
Lipid Metabolism,Molecular Transport,Small Molecule Biochemistry	deposition	Deposition of lipid	0.0042	0.0705				HIF1A,NR1H4,PPARD,SCD	4
Cell Death and Survival	apoptosis	Apoptosis of lymphatic system cells	0.00421	0.0705		-0.422	-0.4	ABL1,BLM,BMF,CDKN1A,CFLAR,FBXW7,FCGR3A/FCGR3B,HIF1A,IER3,MERTK,Mt1,Rorc,SLC39A10,SPHK2,ZBTB16	15
Cancer,Hematological Disease,Immunological Disease,Organismal Injury and Abnormalities	lymphocytic leukemia	Lymphocytic leukemia	0.00427	0.0712				ABL1,ATP1B1,CDKN1A,ERC1,FBXW7,GADD45G,HSP90B1,HSPH1,KLF3,KMT2C,LGALS9B,MTHFR,MTMR4,NAMPT,NEDD9,PLEKHG6,POU3F1,RND2,SRMS,TMEM268,TUBB2A,UBN1,USP34,WDR91,ZBTB16	25
Cancer,Organismal Injury and Abnormalities	tubular adenocarcinoma	Tubular adenocarcinoma	0.00427	0.0712				AMACR,AOX1,BLM,FBXW7,HIF1A,HSP90B1,MERTK,TUBB2A	8
IL6		cytokine	Activated	2.369	2.426	0.0194	0.128	ATP2A2,CAPRIN1,CDKN1A,CFLAR,ENPP2,G6PC,GADD45G,GCH1,HIF1A,IL1R1,MERTK,Mt1,Mt1m/Mt2A,NAMPT,NOS3,NR1H4,Srsf5,TFRC
PRMT5	-0.009	enzyme				0.0199	0.128	CYP8B1,G6PC,SLC45A3
ouabain		chemical drug				0.0199	0.128	CDKN1A,HIF1A,YWHAG
MYC	0.851	transcription regulator		-1.813	-1.76	0.02	0.128	ABCB9,CDKN1A,CFLAR,COL4A1,EFTUD2,G6PC,GADD45G,GCK,HIF1A,HLA-E,HSPH1,IER3,IPO7,Mt1,MTHFR,NDRG2,PGK1,PIAS3,PPARD,SFXN1,SLC25A19,STMN1,TEAD1,TFRC,USP36
cerivastatin		chemical drug		-0.977	-0.982	0.0201	0.128	CDKN1A,GCH1,NOS3,THBD
calcimycin		chemical reagent		-0.434	-0.391	0.0203	0.128	ATP2A2,GCH1,HIF1A,HSP90B1,MTHFR
AR	-0.119	ligand-dependent nuclear receptor		-0.162	-0.115	0.0205	0.128	ATP2A2,AVPR1A,BMF,CDKN1A,CFLAR,DNAJB9,EHD3,FKBP4,HSPH1,IL1R1,PIAS3,SLC45A3,ZBTB16
RXRA	-0.075	ligand-dependent nuclear receptor		-0.68	-0.666	0.0207	0.128	CDKN1A,CPT1B,GCK,HIF1A,IER3,NEDD9,PPARD,SCD,THBD
TCF4	-0.961	transcription regulator		-1.027	-1	0.021	0.128	ANGPTL4,BNIP3,CDH17,CDKN1A,GEMIN5,HIF1A,HSP90B1,NCOR2,NEDD9,TAPBPL,YWHAG
CITED2	0.228	transcription regulator				0.0212	0.128	ANGPTL4,HIF1A,PGK1
CDK2	0.1	kinase				0.0212	0.128	CDKN1A,GCK,NCOR2
TXN	0.012	enzyme				0.0212	0.128	CDKN1A,CPT1B,HIF1A
NME1	-0.038	kinase				0.0212	0.128	CDKN1A,GEMIN5,RNGTT
alpha-amanitin		chemical toxicant				0.0214	0.128	CDKN1A,HBB
Cyclin E		group				0.0214	0.128	CDKN1A,HIF1A
ZC3H14	0.395	other				0.0214	0.128	CITED2,MERTK
KDM4A	0.211	transcription regulator				0.0214	0.128	ALS2,CDKN1A
p85 (pik3r)		group				0.0214	0.128	HIF1A,NOS3
FKBP4	-0.218	enzyme				0.0214	0.128	G6PC,NOS3
mir-515		microRNA				0.0214	0.128	ANGPTL4,HIF1A
ITPR1	-0.08	ion channel				0.0214	0.128	G6PC,NOS3
pyruvaldehyde		chemical - endogenous mammalian				0.0214	0.128	GCK,NOS3
thioacetamide		chemical toxicant				0.0215	0.128	BLM,CDH17,CPT1B,CYP8B1,EHD3,HIF1A,IER3,PLPP3
miR-16-5p (and other miRNAs w/seed AGCAGCA)		mature microRNA		0.516	0.436	0.0217	0.128	CAPRIN1,CHORDC1,DNAJB4,HSP90B1,PHLDB2,RFT1,UGP2
PD98059		chemical - kinase inhibitor		0.397	0.326	0.0218	0.128	BNIP3,CDC42EP1,CDKN1A,CFLAR,COL4A1,DYRK1B,EIF2AK3,HIF1A,IER3,MAPKAPK2,NOS3,PPARD,RNASE4,TUBB2A
ascorbic acid		chemical - endogenous mammalian		-1.127	-1.121	0.0219	0.128	BMF,CDKN1A,HIF1A,SLC20A1
NFATC2	0.022	transcription regulator		1.955	1.982	0.0222	0.128	CDKN1A,CFLAR,CITED2,ENPP2,IER3,MERTK,NOX4
TP73	-0.3	transcription regulator		-0.66	-0.631	0.0224	0.128	ALAS2,ANGPTL4,ARNTL,CDKN1A,CNN3,DBP,HIF1A,IER3,PNRC1,SPHK2,STMN1
PTP4A1	0.001	phosphatase		0.43	0.447	0.0224	0.128	DNAJB1,HIF1A,NCK1,SEPTIN11,STMN1
EGLN		group		-0.194	-0.264	0.0225	0.128	BNIP3,GPR146,GRHPR,PGK1,PPME1,RNASE4
sodium bisulfide		chemical reagent				0.0225	0.128	GSS,NOS3,NOX4
TXNIP	-0.182	other				0.0225	0.128	CDKN1A,CYP8B1,NOX4
dimethylnitrosamine		chemical toxicant				0.0225	0.128	CDKN1A,COL4A1,Mt1
Ro31-8220		chemical - kinase inhibitor				0.0225	0.128	CDKN1A,HIF1A,Mt1
1,2-dithiol-3-thione		chemical reagent		-1.098	-1.038	0.0227	0.128	ALAS2,BNIP3,CHORDC1,DNAJB9,ERP29,HSP90B1,TFRC
atorvastatin		chemical drug		-0.431	-0.443	0.0227	0.128	CYP8B1,HBB,IER3,MCMDC2,NOS3,NOX4,SLCO2B1
N-Ac-Leu-Leu-norleucinal		chemical - protease inhibitor		-0.113	-0.088	0.0228	0.128	CDKN1A,IER3,NEDD9,STMN1
USF1	0.054	transcription regulator				0.0237	0.128	CBS/CBSL,CPT1B,G6PC,Mt1
SERPINA1	0.055	other				0.0238	0.128	ANGPTL4,CYP8B1,HSP90B1
MEF2A	0.035	transcription regulator				0.0238	0.128	ATP2A2,CPT1B,THBD
hexamethylene bisacetamide		chemical reagent				0.0238	0.128	ALAS2,CDKN1A,TFRC
N-acetylsphingosine		chemical reagent				0.0238	0.128	BNIP3,CDKN1A,EIF2AK3
GSK3B	0.08	kinase		-0.97	-0.972	0.0238	0.128	ATP2A2,CDKN1A,CFLAR,HIF1A,RND2
GW3965		chemical reagent		-0.876	-0.882	0.0238	0.128	GADD45G,GCK,IER3,MERTK,SCD
Pdgf Ab		complex				0.0239	0.128	HIF1A,SCD
FMO3	0.123	enzyme				0.0239	0.128	G6PC,SCD
AKR1B1	0	enzyme				0.0239	0.128	CDKN1A,CFLAR
EGLN3	0.286	enzyme				0.0239	0.128	HIF1A,NOS3
PDK4	-0.325	kinase				0.0239	0.128	CPT1B,HIF1A
magnolol		chemical - endogenous non-mammalian				0.0239	0.128	CDKN1A,HIF1A
LDL		complex		1.089	1.132	0.0243	0.128	ATP2A2,CBS/CBSL,CDKN1A,CFLAR,HIF1A,HSP90B1,NAMPT,NOS3
ANGPT2	0.399	growth factor		-0.562	-0.509	0.0243	0.128	CDKN1A,DNAJB4,FKBP4,HIF1A,NOS3,NOX4,RBM14
MACROH2A1	-0.056	other		-1.403	-1.414	0.0247	0.128	CDKN1A,CITED2,G6PC,GCK
MBD3	0.012	other				0.0247	0.128	FZD5,Mt1,PPARD,SCD
spironolactone		chemical drug		-0.2	-0.218	0.0247	0.128	CDKN1A,NOS3,SCD,SLCO2B1
nitrofurantoin		chemical drug		-0.01	0	0.025	0.128	AMACR,GSS,IER3,Mt1,NR1H4,STMN1
Hsp27		group				0.0252	0.128	CDKN1A,GCH1,NOX4
obeticholic acid		chemical drug				0.0252	0.128	CYP8B1,G6PC,NR1H4
HOTAIR		other				0.0252	0.128	CDKN1A,HIF1A,TEAD1
SPHK1	0.136	kinase				0.0252	0.128	CDKN1A,GCH1,HIF1A
STAT1	-0.908	transcription regulator		1.667	1.733	0.0264	0.128	ABCB9,ALAS2,C1S,CDKN1A,GCK,HIF1A,HLA-E,IL1R1,NOX4,TAPBPL
selumetinib		chemical drug				0.0265	0.128	CDKN1A,HIF1A
CREBZF	0.018	transcription regulator				0.0265	0.128	DNAJB9,G6PC
NUMB	0.154	other				0.0265	0.128	CDKN1A,CFLAR
TMBIM6	-0.446	other				0.0265	0.128	DNAJB9,G6PC
SUV39H1	-0.016	enzyme				0.0265	0.128	CDKN1A,HBB
MUC4		other				0.0265	0.128	CDKN1A,VTN
DPP-23		chemical reagent				0.0265	0.128	DNAJB4,DNAJB9
dichlororibofuranosylbenzimidazole		chemical toxicant				0.0265	0.128	CDKN1A,HIF1A
FBXO32	-0.025	enzyme		-0.777	-0.762	0.0267	0.128	ALG12,DNAJB9,EIF2AK3,IL1R1
HMGB1		transcription regulator		1.105	1.154	0.0267	0.128	CDKN1A,HIF1A,IL1R1,MERTK
Npm		group				0.0267	0.128	CDKN1A
hypoxanthine		chemical - endogenous mammalian				0.0267	0.128	AVPR1A
isosorbide dinitrate		chemical drug				0.0267	0.128	NOS3
arbutin		chemical drug				0.0267	0.128	CDKN1A
loganin		chemical - endogenous non-mammalian				0.0267	0.128	NOX4
Clock-Bmal1		complex				0.0267	0.128	NAMPT
monooleylphosphatidic acid		chemical - endogenous mammalian				0.0267	0.128	ENPP2
L-ornithine		chemical - endogenous mammalian				0.0267	0.128	CDKN1A
7alpha-hydroxycholesterol		chemical - endogenous mammalian				0.0267	0.128	G6PC
opioid receptor		group				0.0267	0.128	BACE1
colesevelam		chemical drug				0.0267	0.128	CYP8B1
DPTA-NONOate		chemical reagent				0.0267	0.128	CFLAR
WDR82	-0.285	other				0.0267	0.128	CDKN1A
chartreusin		chemical reagent				0.0267	0.128	CDKN1A
3-(methylthio)propionic acid		chemical - endogenous mammalian				0.0267	0.128	G6PC
Tap		complex				0.0267	0.128	HLA-E
Cry-Period		complex				0.0267	0.128	ARNTL
prunetin		chemical - endogenous non-mammalian				0.0267	0.128	ADIPOR2
Smr3b/Vcsa2		other				0.0267	0.128	HIF1A
USP42	0.029	peptidase				0.0267	0.128	CDKN1A
NSA2	0.058	other				0.0267	0.128	CDKN1A
LPIN2	0.22	phosphatase				0.0267	0.128	LPIN1
AIPL1		other				0.0267	0.128	PDE6C
RTN3	-0.035	other				0.0267	0.128	BACE1
MAGEA2/MAGEA2B		other				0.0267	0.128	CDKN1A
SLC9A9	-0.124	transporter				0.0267	0.128	TFRC
MARCHF2	-0.756	enzyme				0.0267	0.128	TFRC
ANGPTL8	-0.448	other				0.0267	0.128	CPT1B
ZBTB49	-1.061	transcription regulator				0.0267	0.128	CDKN1A
C1QL3		other				0.0267	0.128	G6PC
RNF126	-0.116	enzyme				0.0267	0.128	CDKN1A
NAT8		transcription regulator				0.0267	0.128	BACE1
WDR13	0.219	other				0.0267	0.128	CDKN1A
CPEB2	-0.681	translation regulator				0.0267	0.128	HIF1A
Importin alpha		group				0.0267	0.128	CDKN1A
ACER3	-0.064	enzyme				0.0267	0.128	CDKN1A
BACE1-AS		other				0.0267	0.128	BACE1
KIR		group				0.0267	0.128	CFLAR
SRD5A2		enzyme				0.0267	0.128	Mt1
PDIA4	-0.162	enzyme				0.0267	0.128	TG
SNX6	0.088	transporter				0.0267	0.128	BACE1
HLTF	0.506	transcription regulator				0.0267	0.128	HBB
CAMKK1	0.071	kinase				0.0267	0.128	FBXW7
HPGD	0.224	enzyme				0.0267	0.128	CDKN1A
KLHL40		other				0.0267	0.128	BNIP3
miR-155-3p (miRNAs w/seed UCCUACC)		mature microRNA				0.0267	0.128	DNAJB1
mir-622		microRNA				0.0267	0.128	HIF1A
mir-370		microRNA				0.0267	0.128	PTPRN
mir-184		microRNA				0.0267	0.128	AGO2
ELAC2	-0.047	enzyme				0.0267	0.128	CDKN1A
SALL2	0.099	transcription regulator				0.0267	0.128	CDKN1A
NUBP1	-0.005	other				0.0267	0.128	TFRC
MAGEA4		other				0.0267	0.128	CDKN1A
POLDIP3	-0.003	other				0.0267	0.128	CDKN1A
TSPYL2	-1.753	other				0.0267	0.128	CDKN1A
ITM2B	0.055	other				0.0267	0.128	BACE1
PEX2	0.013	other				0.0267	0.128	CDKN1A
NASP	0.075	other				0.0267	0.128	CDKN1A
ZNF197		transcription regulator				0.0267	0.128	HIF1A
CCT5	-0.052	other				0.0267	0.128	CDKN1A
MUC16		other				0.0267	0.128	CFLAR
Hnrpfl		other				0.0267	0.128	ELL2
DDX24	-0.034	enzyme				0.0267	0.128	CDKN1A
MDFI	0.426	other				0.0267	0.128	FBXW7
PGAM1	-0.043	phosphatase				0.0267	0.128	CDKN1A
GCKR	-0.836	other				0.0267	0.128	GCK
ARNTL2	0.339	transcription regulator				0.0267	0.128	THBD
ING5		other				0.0267	0.128	CDKN1A
KHDRBS2		other				0.0267	0.128	CDKN1A
MTHFR	-0.547	enzyme				0.0267	0.128	NOS3
cycloastragenol		chemical reagent				0.0267	0.128	CDKN1A
GALR2		G-protein coupled receptor				0.0267	0.128	CDKN1A
PCBP4	0.053	other				0.0267	0.128	CDKN1A
PDIA6	-0.078	enzyme				0.0267	0.128	HSP90B1
ITPR3	-0.014	ion channel				0.0267	0.128	G6PC
CGGBP1	-0.008	transcription regulator				0.0267	0.128	CDKN1A
CRTAP		other				0.0267	0.128	CDKN1A
Cops2	-0.006	transcription regulator				0.0267	0.128	CDKN1A
NAT8B		enzyme				0.0267	0.128	BACE1
PIN4	0.071	enzyme				0.0267	0.128	G6PC
MI-63		chemical reagent				0.0267	0.128	CDKN1A
MAP4	0.024	other				0.0267	0.128	HIF1A
DUOX2		enzyme				0.0267	0.128	CDKN1A
LPCAT1	-0.054	enzyme				0.0267	0.128	DNAJB9
ZFYVE16	-2.206	other				0.0267	0.128	CDKN1A
CARHSP1	0.045	transcription regulator				0.0267	0.128	G6PC
securinine		chemical reagent				0.0267	0.128	CDKN1A
BAI		chemical - kinase inhibitor				0.0267	0.128	CFLAR
reactive nitrogen species		chemical - other				0.0267	0.128	HIF1A
polyethylene glycol		chemical drug				0.0267	0.128	CDKN1A
telomestatin		chemical - endogenous non-mammalian				0.0267	0.128	CDKN1A
primaquine		chemical drug				0.0267	0.128	GCH1
indapamide		chemical drug				0.0267	0.128	NOS3
clorgyline		chemical drug				0.0267	0.128	HIF1A
kynurenic acid		chemical - endogenous mammalian				0.0267	0.128	CDKN1A
8-methyl-pyridoxatin		chemical reagent				0.0267	0.128	HIF1A
PSB-1115		chemical reagent				0.0267	0.128	HIF1A
dicumarol		chemical drug				0.0267	0.128	Mt1
efaroxan		chemical reagent				0.0267	0.128	NR1H4
OR141		chemical reagent				0.0267	0.128	HIF1A
1-o-hexadecyl-2-o-methyl-rac-glycerol		chemical - kinase inhibitor				0.0267	0.128	CDKN1A
hypericin		chemical drug				0.0267	0.128	ATP2A2
felodipine		chemical drug				0.0267	0.128	NOS3
Cavtratin		chemical - kinase inhibitor				0.0267	0.128	NOS3
SC144		chemical reagent				0.0267	0.128	ENPP2
hdm-2 antagonistic peptide		chemical reagent				0.0267	0.128	CDKN1A
MW167		chemical - protease inhibitor				0.0267	0.128	BACE1
isorhamnetin		chemical - endogenous non-mammalian				0.0267	0.128	NOS3
quinine		chemical drug				0.0267	0.128	GCH1
vinflunine		chemical drug				0.0267	0.128	CDKN1A
hexanoic acid		chemical - endogenous mammalian				0.0267	0.128	G6PC
cyclosporin H		chemical reagent				0.0267	0.128	AVPR1A
N(omega)-hydroxyarginine		chemical - endogenous mammalian				0.0267	0.128	CDKN1A
L-canavanine		chemical - endogenous non-mammalian				0.0267	0.128	BAG3
fructose-2,6-diphosphate		chemical - endogenous mammalian				0.0267	0.128	G6PC
androsterone		chemical - endogenous mammalian				0.0267	0.128	SLC45A3
22-hydroxycholesterol		chemical - endogenous mammalian				0.0267	0.128	GCK
17-epiestriol		chemical - endogenous mammalian				0.0267	0.128	NOS3
LDLR	0.048	transporter				0.0272	0.13	CDKN1A,G6PC,GADD45G,IER3,MERTK,NOS3,SCD
SP3	-0.015	transcription regulator		-0.985	-0.956	0.0272	0.13	AFAP1L1,BMF,CBS/CBSL,CDKN1A,CITED2,NOS3,PGK1
IGF2		growth factor				0.0276	0.132	CDKN1A,GCH1,HIF1A,IER3,SLC20A1,Srsf5
S100A9	-0.335	other		-1.657	-1.633	0.0276	0.132	BACE1,BMF,C1S,ENPP2,Hells/LOC100911660,NR1H4
FGF19		growth factor				0.0277	0.132	CYP8B1,GCK,SCD,SLC2A5
RUNX3		transcription regulator		0.245	0.2	0.0278	0.132	CDKN1A,CFLAR,COL4A1,RHOBTB3,TEAD1
celecoxib		chemical drug		-0.495	-0.513	0.0278	0.132	CDKN1A,CFLAR,DNAJB9,HIF1A,PPARD
tanespimycin		chemical drug		0.849	0.815	0.0278	0.132	CDKN1A,CFLAR,DNAJB1,HSP90B1,SCD
RAF1	0.054	kinase		-0.123	-0.059	0.0278	0.132	CDC42EP1,CDKN1A,HIF1A,IER3,IL1R1,TUBB2A,YPEL5
reactive oxygen species		chemical toxicant		-1.307	-1.258	0.0286	0.135	CDKN1A,G6PC,GCK,HIF1A,LPIN1
maslinic acid		chemical - endogenous non-mammalian				0.0287	0.136	CAMK2G,PPARD,PRKCI,YWHAG
PIK3R1	0.057	kinase		0.119	0.152	0.0287	0.136	DNAJB9,GCH1,HIF1A,HSP90B1
puromycin		chemical - endogenous non-mammalian				0.0291	0.136	IPO7,NOX4
CYB5R4	0.012	enzyme				0.0291	0.136	Mt1,SCD
SP100		transcription regulator				0.0291	0.136	CDKN1A,HBB
mir-101		microRNA				0.0291	0.136	FZD6,STMN1
RND3	0.065	enzyme				0.0291	0.136	CDKN1A,HIF1A
LGALS9		other				0.0291	0.136	CDKN1A,FCGR3A/FCGR3B
1-methyl-4-phenylpyridinium		chemical toxicant				0.0291	0.136	HIF1A,TFRC
farnesol		chemical reagent				0.0291	0.136	CDKN1A,HSP90B1
TNFSF11		cytokine		1.849	1.912	0.0295	0.138	AQP9,CDKN1A,GCH1,IER3,NAB2,NFIL3,SLC20A1,STMN1
fluocinolone acetonide		chemical drug				0.0296	0.138	ANGPTL4,PER3,ZBTB16
RETN		other				0.0296	0.138	G6PC,NOS3,SCD
NKX2-3		transcription regulator		-0.441	-0.44	0.0296	0.138	ANGPTL4,CBS/CBSL,CDKN1A,GCH1,HSD17B2,MCMDC2,NOS3
nocodazole		chemical reagent		0.966	0.975	0.0298	0.138	CDKN1A,CFLAR,HIF1A,SCD
NRG1	-0.154	growth factor		1.137	1.175	0.0301	0.139	BNIP3,CDC42EP1,CDKN1A,HIF1A,IER3,NCOR2,POU3F1,STMN1
tamoxifen		chemical drug		0.79	0.794	0.0302	0.139	AQP9,CDKN1A,CFLAR,GCK,HIF1A,HSP90B1,IER3,NOS3,SCD
carbon tetrachloride		chemical toxicant		-1.105	-1.067	0.0303	0.14	AOX1,CDKN1A,Mt1,NDRG2,NR1H4,PPARD,SPHK2
vancomycin		biologic drug		-0.167	-0.132	0.0309	0.143	CCS,IER3,NOX4,SCD
dimethyl sulfoxide		chemical drug		-0.036	0	0.0312	0.144	ALAS2,BNIP3,DNAJB4,LOXL4,TFRC
DNA-methyltransferase		group				0.0319	0.145	CDKN1A,NAB2
Ras homolog		group				0.0319	0.145	CDKN1A,NOS3
salinosporamide A		chemical drug				0.0319	0.145	CFLAR,HIF1A
SAV1	0.052	other				0.0319	0.145	CDKN1A,COL4A1
FUT8	0.033	enzyme				0.0319	0.145	FZD6,TFRC
COPS5	0.052	transcription regulator				0.0319	0.145	CDKN1A,HIF1A
carbenoxolone		chemical toxicant				0.0319	0.145	NOS3,NOX4
nickel		chemical toxicant				0.0319	0.145	HIF1A,Mt1
CSF3		cytokine		1.323	1.342	0.032	0.145	ENPP2,GADD45G,NFIL3,NOS3,SLC20A2,TFRC
cycloheximide		chemical reagent		1.889	1.878	0.032	0.145	CDKN1A,CFLAR,CITED2,GADD45G,HIF1A,KLF3,Mt1,PGK1,SCD,THBD
IL12 (family)		group		-0.973	-0.943	0.0321	0.145	CFLAR,ENPP2,FCGR3A/FCGR3B,NFIL3,TFRC
WNT1		cytokine				0.0321	0.145	CDKN1A,EIF1AX,ENPP2,GADD45G,NCK1
TSC2	-0.285	other	Inhibited	-1.97	-2	0.0321	0.145	CDKN1A,HIF1A,Mt1,SCD,TMEM176A
MET	0.096	kinase		-0.032	0	0.0321	0.145	BMF,CDKN1A,CITED2,MERTK,NOX4
ZBTB20	-0.534	transcription regulator				0.0327	0.148	G6PC,GCK,NEDD9
RHOA	0.008	enzyme				0.0332	0.148	CDKN1A,DYRK1B,NOS3,TG
tetrachlorodibenzodioxin		chemical toxicant		0.458	0.464	0.0335	0.148	ADIPOR2,CDKN1A,DMXL2,GRHPR,HDAC11,KIF1B,NEDD9,RNGTT,SLC38A3,SLCO2B1
fulvestrant		chemical drug		-0.616	-0.636	0.0336	0.148	ABL1,BLM,CDKN1A,IER3,PPME1,RBM14,STMN1,TFRC
mir-223		microRNA		0.657	0.669	0.0339	0.148	FAM20C,FBXW7,FNIP2,NDRG2,STMN1
E2F4	-0.073	transcription regulator				0.0342	0.148	BNIP3,CDKN1A,HSP90B1,MCM10,SFPQ,STMN1,UNG
BAX	0.044	transporter				0.0344	0.148	CDKN1A,DNAJB9,TRIM6-TRIM34
PTPRJ	-0.259	phosphatase				0.0344	0.148	CITED2,MERTK,TG
SMYD1	-0.064	transcription regulator				0.0344	0.148	NAMPT,PDHB,UGP2
EIF4G2	-0.073	translation regulator				0.0348	0.148	CDKN1A,HIF1A
MAPK13	-0.037	kinase				0.0348	0.148	CDKN1A,CITED2
miR-103-3p (and other miRNAs w/seed GCAGCAU)		mature microRNA				0.0348	0.148	AGO2,BACE1
TRPC1	-0.103	ion channel				0.0348	0.148	CDKN1A,HIF1A
HFE	0.513	transmembrane receptor				0.0348	0.148	HSP90B1,TFRC
PTPN3	-0.35	phosphatase				0.0348	0.148	ANGPTL4,CDKN1A
HSP90AB1	-0.106	enzyme				0.0348	0.148	CFLAR,HIF1A
plerixafor		chemical drug				0.0348	0.148	NOS3,PGK1
beta-glycerophosphoric acid		chemical - endogenous mammalian				0.0348	0.148	CDKN1A,SLC20A1
ATN1	-0.227	transcription regulator				0.0349	0.148	ATP1B1,DBP,FBXW7,NAB2,STMN1
GW9662		chemical reagent		1.197	1.177	0.0356	0.148	ANGPTL4,CDKN1A,FADS3,NOS3
trans-hydroxytamoxifen		chemical drug		-1.659	-1.671	0.0359	0.148	CITED2,HIF1A,IER3,IL1R1,LOXL4,TMEM131L
L-methionine		chemical - endogenous mammalian				0.036	0.148	G6PC,MAT1A,SPHK2
SHC1	-0.199	other				0.036	0.148	BMF,CDKN1A,THBD
doxorubicin		chemical drug		0.449	0.481	0.0364	0.148	ABCB9,ATP2A2,CDKN1A,CFLAR,GSS,HIF1A,HSPH1,IER3,Irs3,NOX4,STMN1
forskolin		chemical toxicant		-0.312	-0.258	0.0366	0.148	ATP1B1,BAG3,CDKN1A,ELL2,G6PC,GADD45G,GCH1,HIF1A,IER3,Mt1,NAMPT,NFIL3,PGK1,POU3F1,PTPRN,SLC2A5
flutamide		chemical drug				0.0368	0.148	ALAS2,AQP9,HIF1A,NOS3
desmopressin		biologic drug				0.0368	0.148	HSPH1,NDRG2,PHLDB2,RBM14
AG490		chemical - kinase inhibitor		-0.279	-0.324	0.0368	0.148	CDKN1A,ENPP2,HIF1A,NOS3
GATA2	0.011	transcription regulator		0.543	0.555	0.0372	0.148	ALAS2,ANGPTL2,AQP9,CDKN1A,MAT1A,NFIL3,NOS3,TEAD1,TFRC,TSPAN12
3-methylcholanthrene		chemical toxicant				0.0377	0.148	ALAS2,Mt1,NEDD9
FAM3B	-0.478	cytokine				0.0378	0.148	CDKN1A,IER3
FGF4		growth factor				0.0378	0.148	CDKN1A,SCD
SLC2A4		transporter				0.0378	0.148	G6PC,GCK
TF	0.04	transporter				0.0378	0.148	ERP29,TFRC
miR-30a-3p (and other miRNAs w/seed UUUCAGU)		mature microRNA				0.0378	0.148	CEMIP2,KIF1B
BTRC	0.167	enzyme				0.0378	0.148	ARNTL,CDKN1A
TGFB1I1	-0.288	transcription regulator				0.0378	0.148	CDKN1A,NOX4
HSPA9	-0.034	other				0.0378	0.148	CDKN1A,NEDD9
TFF3		other				0.0378	0.148	G6PC,HIF1A
CL 316243		chemical drug				0.0378	0.148	CPT1B,SCD
Ro41-5253		chemical reagent				0.0378	0.148	CDKN1A,THBD
evodiamine		chemical - endogenous non-mammalian				0.0378	0.148	CFLAR,EIF2AK3
cannabidiol		chemical drug				0.0378	0.148	HIF1A,NOS3
PRL		cytokine		1.452	1.51	0.0381	0.148	ATP2A2,CDKN1A,CNN3,IER3,NOS3,RNASE4,TRIM14,YWHAG
PPARD	-0.535	ligand-dependent nuclear receptor		-0.677	-0.642	0.0386	0.148	ANGPTL4,CPT1B,GCK,MERTK,PER3,PPARD,SCD
cisplatin		chemical drug		1.814	1.852	0.0386	0.148	ABL1,CDKN1A,CFLAR,CPT1B,DMXL2,FADS3,FBXW7,G6PC,HIF1A,IER3,LPIN1,MAT1A,Mt1,NOX4,NR1H4,STMN1,ZNF436
TERT	0.175	enzyme				0.0388	0.148	AFAP1L1,AMACR,BNIP3,CDKN1A,NOS3
YY1	-0.08	transcription regulator				0.0394	0.148	CDKN1A,DNAJB4,GADD45G,HIF1A,SFPQ,SFXN1,Srsf5,UNG
CAT	0.05	enzyme				0.0395	0.148	CDKN1A,CFLAR,HIF1A
thioguanine		chemical drug				0.0398	0.148	BNIP3
beryllium sulfate		chemical toxicant				0.0398	0.148	CDKN1A
H. carbonum toxin		biologic drug				0.0398	0.148	CDKN1A
(diaminocyclohexane)(diacetato)(dichloro)platinum		chemical reagent				0.0398	0.148	CDKN1A
benfotiamine		chemical drug				0.0398	0.148	NOX4
celiprolol		chemical drug				0.0398	0.148	NOS3
Cyclin B		group				0.0398	0.148	CFLAR
TFIIH		complex				0.0398	0.148	CDKN1A
MLN8054		chemical drug				0.0398	0.148	CDKN1A
Gm10768		other				0.0398	0.148	G6PC
natriuretic peptide derivative		biologic drug				0.0398	0.148	PPARD
CTNS	0.308	transporter				0.0398	0.148	RILP
KDM4D		enzyme				0.0398	0.148	CDKN1A
ZNF346	0.797	other				0.0398	0.148	CDKN1A
RFFL	0.292	enzyme				0.0398	0.148	CDKN1A
TTC5	0.149	other				0.0398	0.148	CDKN1A
PTPMT1	-0.01	phosphatase				0.0398	0.148	CDKN1A
ELOVL2	-0.045	enzyme				0.0398	0.148	SCD
ZSCAN10		transcription regulator				0.0398	0.148	EIF1AX
ZNF451	0.031	enzyme				0.0398	0.148	CDKN1A
BCS1L	0.074	other				0.0398	0.148	HIF1A
PYHIN1		other				0.0398	0.148	CDKN1A
N4BP2L2	-0.012	transcription regulator				0.0398	0.148	CDKN1A
2-(3-chlorophenylamino)phenylacetic acid		chemical drug				0.0398	0.148	COL4A1
COQ7	0.185	enzyme				0.0398	0.148	HIF1A
CTBP1-DT		other				0.0398	0.148	CDKN1A
EXOC3L1	-0.002	other				0.0398	0.148	CDKN1A
OLA1	0.017	enzyme				0.0398	0.148	CDKN1A
NKAP	-0.214	transcription regulator				0.0398	0.148	ST8SIA1
Fetal Hemoglobin		complex				0.0398	0.148	HIF1A
isoleucine		chemical - endogenous mammalian				0.0398	0.148	CDKN1A
volasertib		chemical drug				0.0398	0.148	MDC1
YEATS4	0.055	transcription regulator				0.0398	0.148	CDKN1A
RNF144B	0.173	enzyme				0.0398	0.148	CDKN1A
TERF1	-0.029	transcription regulator				0.0398	0.148	CDKN1A
ELL	0.2	transcription regulator				0.0398	0.148	CDKN1A
DDX6	-0.105	enzyme				0.0398	0.148	LPIN1
PMEPA1	0.103	other				0.0398	0.148	CDKN1A
MCRS1	-0.013	other				0.0398	0.148	CDKN1A
U2AF2	0.001	other				0.0398	0.148	CDKN1A
CUL4A	-0.148	other				0.0398	0.148	CDKN1A
mir-338		microRNA				0.0398	0.148	HIF1A
mir-541		microRNA				0.0398	0.148	PTPRN
miR-485-3p (and other miRNAs w/seed UCAUACA)		mature microRNA				0.0398	0.148	KMT2C
mir-342		microRNA				0.0398	0.148	PTPRN
mir-298		microRNA				0.0398	0.148	BACE1
P4HB	-0.03	enzyme				0.0398	0.148	AGO2
ARHGAP1	0.181	other				0.0398	0.148	CDKN1A
KLF16		transcription regulator				0.0398	0.148	CDKN1A
RAB11A	-0.023	enzyme				0.0398	0.148	SLC2A5
FTMT		enzyme				0.0398	0.148	TFRC
SRCAP	-0.058	transcription regulator				0.0398	0.148	CDKN1A
EID2	-0.117	other				0.0398	0.148	CDKN1A
GUCY1A1	-0.032	enzyme				0.0398	0.148	NOS3
CHCHD4	-0.176	enzyme				0.0398	0.148	HIF1A
SIVA1	0.04	other				0.0398	0.148	CFLAR
TRAF7	0.037	enzyme				0.0398	0.148	CFLAR
SYF2	0.08	other				0.0398	0.148	CDKN1A
PDZD2	-0.015	other				0.0398	0.148	CDKN1A
TRERF1	-1.324	transcription regulator				0.0398	0.148	CDKN1A
GOPC		transporter				0.0398	0.148	KCNH1
SPAG9	0.343	other				0.0398	0.148	CDKN1A
Cdkal1	-0.134	enzyme				0.0398	0.148	PTPRN
S100A2		other				0.0398	0.148	BNIP3
BLM	0.414	enzyme				0.0398	0.148	CDKN1A
TUBB1	-0.177	other				0.0398	0.148	TUBB2A
AP2A2	-0.176	transporter				0.0398	0.148	CDKN1A
RASSF7	0.264	other				0.0398	0.148	CDKN1A
ELOA	-0.011	transcription regulator				0.0398	0.148	CDKN1A
RECQL	-0.344	enzyme				0.0398	0.148	HBB
CDC20	-0.182	other				0.0398	0.148	CFLAR
HES6	0.194	transcription regulator				0.0398	0.148	CDKN1A
ITGB8		other				0.0398	0.148	CDKN1A
RACGAP1	-0.149	transporter				0.0398	0.148	CDKN1A
BUB3	-0.282	other				0.0398	0.148	CDKN1A
CASP8AP2	3.654	transcription regulator				0.0398	0.148	CFLAR
PDCD5		other				0.0398	0.148	ATP2A2
TCP1	-0.352	other				0.0398	0.148	CDKN1A
GCM1		transcription regulator				0.0398	0.148	FZD5
PF-670462		chemical - kinase inhibitor				0.0398	0.148	WNK1
8-butyl-10-[(3-methoxy-5-pyrrol-2-ylidenepyrrol-2-ylidene)methyl]-11-azabicyclo[7.2.1]dodeca-1(12),9-diene		chemical reagent				0.0398	0.148	CDKN1A
HMGN2		other				0.0398	0.148	IER3
KLHL3		other				0.0398	0.148	WNK1
CMYA5		other				0.0398	0.148	ATP2A2
GIMAP1-GIMAP5	-1.125	other				0.0398	0.148	HSP90B1
HNRNPF	-1.628	other				0.0398	0.148	LPIN1
(+)-R-3-(4-chlorophenyl)-3-(1-hydroxymethylcyclopropylmethoxy)-2-(4-nitrobenzyl)-2,3-dihydroisoindol-1-one		chemical reagent				0.0398	0.148	CDKN1A
SB-657510		chemical reagent				0.0398	0.148	ATP2A2
UIMC1	-0.028	other				0.0398	0.148	CDKN1A
FTL	0.212	enzyme				0.0398	0.148	TFRC
STAT3 inhibitor XIII		chemical drug				0.0398	0.148	HIF1A
beta2 adrenergic receptor agonist		chemical drug				0.0398	0.148	CDKN1A
O-(chloroacetylcarbamoyl)fumagillol		chemical drug				0.0398	0.148	CDKN1A
temocapril		chemical reagent				0.0398	0.148	NOS3
tempo		chemical reagent				0.0398	0.148	CFLAR
dephostatin		chemical reagent				0.0398	0.148	CDKN1A
tomelukast		chemical drug				0.0398	0.148	CPT1B
aminooxyacetic acid		chemical reagent				0.0398	0.148	G6PC
beta-lapachone		chemical drug				0.0398	0.148	NOS3
ofloxacin		chemical drug				0.0398	0.148	CDKN1A
ethyl-3-trifluoromethylbenzyl-alpha-ketoglutarate		chemical reagent				0.0398	0.148	HIF1A
magnesium chloride		chemical drug				0.0398	0.148	NOS3
BRF110		chemical reagent				0.0398	0.148	GCH1
SYUIQ-5		chemical reagent				0.0398	0.148	CDKN1A
5-phenylvaleric acid		chemical reagent				0.0398	0.148	DNAJB9
atosiban		biologic drug				0.0398	0.148	CDKN1A
(indol-3-yl)pyruvic acid		chemical - endogenous non-mammalian				0.0398	0.148	HIF1A
lisofylline		chemical drug				0.0398	0.148	COL4A1
10-decarbamoylmitomycin C		chemical toxicant				0.0398	0.148	CDKN1A
HDAC3	0.271	transcription regulator				0.0406	0.15	CDKN1A,ENPP2,NOS3,SCD
bezafibrate		chemical drug		-0.625	-0.586	0.0406	0.15	ANGPTL4,BNIP3,CPT1B,SCD
dexamethasone phosphate		chemical drug				0.0409	0.151	GADD45G,Mt1
mir-103		microRNA				0.0409	0.151	BACE1,HIF1A
RACK1	-0.511	enzyme				0.0409	0.151	CDKN1A,HIF1A
Cdkn1c	0.915	other				0.0409	0.151	CDKN1A,POU3F1
Fus	0.172	transcription regulator				0.0409	0.151	H2BC10,VTN
Ni2+		chemical reagent				0.0409	0.151	ANGPTL4,HIF1A
MAP2K7	0.442	kinase				0.0413	0.152	CDKN1A,ENPP2,IL1R1
BMP6	-0.137	growth factor				0.0419	0.154	CDKN1A,SLC20A1,SLC39A10,TEF
CEBPA	0.191	transcription regulator		-0.905	-0.873	0.0423	0.155	CDKN1A,G6PC,GCH1,IER3,MAPKAPK2,NFIL3,NR1H4,PPARD,SCD,THBD,TUBB2A
MITF	-0.794	transcription regulator		1.844	1.915	0.0424	0.155	CA14,HIF1A,HPS4,MDC1,RAD51D,SOX13,TMCC2
PDX1		transcription regulator		-0.237	-0.219	0.0428	0.157	ATP2A2,G6PC,GCH1,GCK,IER3,Mt1
STAT5A	-0.101	transcription regulator		-0.013	0	0.0429	0.157	CDH17,CDKN1A,CFLAR,GADD45G,GYS2,PPFIBP2,UGP2,YWHAG
SYVN1	-0.167	transporter		0.387	0.447	0.043	0.157	PLPP3,SLC20A1,SLC35C2,SLC39A10,TFRC
trichloroethylene		chemical toxicant				0.0431	0.157	BNIP3,CITED2,MAPKAPK2
bee venom		chemical - endogenous non-mammalian				0.0432	0.157	DNAJB1,NFIL3,NOS3,THBD
miR-146a-5p (and other miRNAs w/seed GAGAACU)		mature microRNA		-0.939	-1	0.0432	0.157	IL1R1,MCM10,TRIM14,VWCE
STK11	-0.031	kinase		-0.933	-0.912	0.0437	0.159	CDKN1A,CYP4F8,HIF1A,LGALS9B,NEDD9,PGK1,PTPRN,RND2
Smad		complex				0.0441	0.159	ANGPTL4,CDKN1A
mir-214		microRNA				0.0441	0.159	G6PC,NOS3
HEXIM1	0.061	transcription regulator				0.0441	0.159	CDKN1A,HIF1A
SSTR2		G-protein coupled receptor				0.0441	0.159	G6PC,GCK
BAG1	-0.049	other				0.0441	0.159	CDKN1A,UAP1
IL1		group		1.026	1.077	0.0444	0.16	ABL1,CDKN1A,FZD5,GCK,HIF1A,IL1R1,NR1H4,TG,THBD
decitabine		chemical drug		-0.326	-0.28	0.0447	0.161	ALS2,ANGPTL4,BNIP3,CDKN1A,CFLAR,GADD45G,GCK,HLA-E,IRX1,MAT1A,MYO9B,NOS3,RNASE4,TFRC,THBD,UNG,VTN
1810019D21Rik		other				0.045	0.162	CDKN1A,NIPAL1,THBD
KLF5	0.36	transcription regulator				0.045	0.162	CDKN1A,CPT1B,HIF1A
IFNA2		cytokine		1.423	1.483	0.0457	0.164	BAG3,C1S,CDKN1A,HIF1A,HLA-E,NOS3,TRIM14
cephaloridine		chemical drug		-1.104	-1.067	0.046	0.165	ANGPTL4,HSPH1,KCNH1,TFRC
CXCR4	-0.252	G-protein coupled receptor				0.0469	0.165	CDKN1A,PGK1,ZBTB16
DCAF1	-0.131	kinase				0.0473	0.165	BMF,CDKN1A
AKT3	-0.569	kinase				0.0473	0.165	BMF,WNK1
MTA2	-0.016	transcription regulator				0.0473	0.165	CDKN1A,HBB
PSMD10	-0.031	transcription regulator				0.0473	0.165	CDKN1A,HIF1A
TAF4B	-0.096	transcription regulator				0.0473	0.165	IER3,ZBTB16
PLK2	0.058	kinase				0.0473	0.165	CITED2,MERTK
CCNE1	0.504	transcription regulator				0.0473	0.165	CDKN1A,HIF1A
arotinoid acid		chemical toxicant				0.0473	0.165	CDKN1A,SCD
linolenic acid		chemical - endogenous mammalian				0.0473	0.165	G6PC,NOS3
indomethacin		chemical drug				0.0474	0.165	BACE1,CDKN1A,HIF1A,IER3,IL1R1,PPARD,UAP1
genistein		chemical drug		-0.848	-0.825	0.048	0.165	ABCB9,ANGPTL4,CDKN1A,CFLAR,CITED2,FBXW7,HIF1A,MDC1,Mt1,NOS3
GATA3	-0.211	transcription regulator		1.033	1.039	0.0482	0.165	ANGPTL4,BMF,CDKN1A,HIF1A,NFIL3,PPARD,ZBTB16
NCOA1	0.158	transcription regulator		-1.092	-1.109	0.0498	0.165	CDKN1A,DBP,HIF1A,LPIN1,PPARD
TGFB2	-0.024	growth factor		-1.967	-1.944	0.0662	0.184	ANGPTL4,CFLAR,COL4A1,SCD
Pkc(s)		group		1.892	1.926	0.0759	0.196	CDKN1A,DBP,HIF1A,HSP90B1,NOX4,PTPRN
FGF1	0.061	growth factor		-1.931	-1.941	0.0903	0.207	CDKN1A,GADD45G,NOS3,PXYLP1
IRF2	0.147	transcription regulator	Activated	1.966	2	0.0943	0.214	C1S,CDKN1A,NAMPT,SLCO2B1
lovastatin		chemical drug		-1.977	-1.954	0.132	0.247	CDKN1A,NOS3,NOX4,PPARD
SMAD7	-0.081	transcription regulator		1.987	1.969	0.149	0.261	CDKN1A,CFLAR,CITED2,SCD
ADCYAP1		other	Activated	2.22	2.236	0.212	0.319	AMACR,CNN3,ENPP2,GYS2,IER3
TLR3	0.135	transmembrane receptor	Activated	2.161	2.219	0.282	0.372	BCAR3,CFLAR,GCH1,IER3,VAV2
KLF4	0.001	transcription regulator	Inhibited	-2.226	-2.186	0.295	0.383	ATP2A2,CDKN1A,NOS3,TEAD1,THBD
mifepristone		chemical drug	Inhibited	-2.17	-2.183	0.436	0.496	CDKN1A,Mt1,NCOR2,NOS3,NOX4
filgrastim		biologic drug		1.994	1.98	1	1	IL1R1,MERTK,NCOR2,SLC45A3

## Sheet: Muscle
# Ingenuity Pathway Analysis - Diseases and Functions - HIPPOCAMPUS
#
Categories	Function	Diseases or Functions Annotation	p-value	B-H p-value	Predicted Activation State	Activation z-score	Bias-corrected z-score	Molecules	# Molecules
Embryonic Development	migration	Migration of embryonic tissue	5.11e-05	0.0357				AFDN,ETS2	2
Cardiovascular System Development and Function,Organismal Development	vasculogenesis	Vasculogenesis	6.72e-05	0.0357		-0.576	-0.741	ADAMTS6,CITED2,CYLD,GSTM1,INSR,KCNJ2,PDGFC,RAPGEF2,SLC9A3R2,SPRY4,TMEM100	11
Cancer,Organismal Injury and Abnormalities	upper aerodigestive tract carcinoma	Upper aerodigestive tract carcinoma	0.000126	0.0357				ADAMTS6,BAZ2B,CITED2,CYLD,DNAJB5,FOXN2,GPAM,GSE1,JCAD,KCNJ2,MPP3,PDGFC,PPP2R5A,SAMD4A,SLC9A2,TCP1,TMEM100,ZNF436	18
Cell Death and Survival,Cell Morphology,Hematopoiesis	loss	Loss of hematopoietic progenitor cells	0.000142	0.0357				CITED2,NFIL3	2
Cellular Development,Cellular Growth and Proliferation,Hematological System Development and Function,Lymphoid Tissue Structure and Development	cell proliferation	Cell proliferation of T lymphocytes	0.000171	0.0357		0.077	-0.03	ANO6,CYLD,ETS2,GADD45B,GPAM,INSR,RIPK2,SELENOK,SOX13	9
Developmental Disorder,Hereditary Disorder,Metabolic Disease,Neurological Disease,Organismal Injury and Abnormalities,Skeletal and Muscular Disorders	familial periodic paralysis	Familial periodic paralysis	0.000183	0.0357				CA4,KCNJ2	2
Cellular Development,Cellular Growth and Proliferation,Hematological System Development and Function,Lymphoid Tissue Structure and Development	proliferation	Proliferation of lymphocytes	0.000186	0.0357		-0.39	-0.509	ANO6,CYLD,ETS2,GADD45B,GPAM,INSR,NFIL3,RIPK2,SELENOK,SOX13	10
Cell Death and Survival,Cellular Compromise,Neurological Disease,Organismal Injury and Abnormalities,Tissue Morphology	neurodegeneration	Neurodegeneration of cortical neurons	0.000228	0.0357				ETS2,NFIL3	2
Lipid Metabolism,Molecular Transport,Small Molecule Biochemistry	secretion	Secretion of steroid hormone	0.000303	0.0357				Akr1c14,CITED2,NFIL3	3
Cell Death and Survival	cell viability	Cell viability	0.000373	0.0357		-0.128	-0.463	CYLD,DUSP7,ETS2,GADD45B,GSTM1,INSR,MBD4,MRM1,MYOD1,NFIL3,PPP2R1B,PPP2R5A,RIPK2,TCP1	14
Cardiovascular System Development and Function,Cellular Development,Cellular Function and Maintenance,Cellular Growth and Proliferation,Organismal Development,Tissue Development	proliferation	Proliferation of endothelial progenitor cells	0.000394	0.0357				KCNJ2,PDGFC	2
Cancer,Organismal Injury and Abnormalities	head and neck carcinoma	Head and neck carcinoma	0.000443	0.0357				ADAMTS4,ADAMTS6,ANO6,BAZ2B,CA4,CBFA2T3,CITED2,CREBRF,CYLD,CYYR1,DAGLA,DBP,DNAJB5,DUSP7,DYNC1LI2,ETS2,FOXN2,GADD45B,GPAM,GSE1,GSTM1,INSR,JCAD,KCNJ2,LRRC30,MAZ,MBD4,MPP3,MYOD1,OSBPL6,PPP2R1B,PPP2R5A,RAPGEF2,RIPK2,SAMD4A,SELENOK,SLC9A2,SLC9A3R2,SOX13,TCP1,TMBIM6,TMEM100,ZNF436	43
Hematological Disease,Metabolic Disease,Organismal Injury and Abnormalities	hyperkalemia	Hyperkalemia	0.000459	0.0357				CA4,INSR	2
Cell Morphology	morphology	Morphology of blood cells	0.000495	0.0357				ANO6,CBFA2T3,CITED2,CYLD,ETS2,NFIL3,RAPGEF2	7
Cell Morphology,Hematopoiesis	abnormal morphology	Abnormal morphology of hematopoietic progenitor cells	0.000659	0.0357				ANO6,CBFA2T3,CITED2,NFIL3	4
Cardiovascular Disease,Hereditary Disorder,Organismal Injury and Abnormalities,Skeletal and Muscular Disorders	familial ventricular fibrillation	Familial ventricular fibrillation	0.000856	0.0357				KCNJ2,KCNJ8	2
Cellular Development,Skeletal and Muscular System Development and Function,Tissue Development	differentiation	Differentiation of skeletal muscle cells	0.00088	0.0357				CITED2,FOXN2,MYOD1	3
Neurological Disease,Organismal Injury and Abnormalities	epilepsy	Epilepsy	0.000939	0.0357				CA4,CITED2,DBP,DNAJB5,GADD45B,NFIL3	6
Molecular Transport	import	Import of K+	0.000949	0.0357				KCNJ2,KCNJ8	2
Cell Cycle	G1/S phase transition	Delay in initiation of G1/S phase transition	0.000949	0.0357				CYLD,INSR	2
Connective Tissue Development and Function,Hematological System Development and Function,Lymphoid Tissue Structure and Development,Organismal Development,Tissue Morphology	quantity	Quantity of peripheral blood lymphocytes	0.00115	0.0357				CYLD,NFIL3	2
Cancer,Organismal Injury and Abnormalities,Reproductive System Disease	breast cancer	Breast cancer	0.00118	0.0357				ADAMTS4,ADAMTS6,CYLD,ETS2,GADD45B,GPAM,GSTM1,INSR,MAZ,MBD4,NFIL3,OSBPL6,PPP2R1B,SAMD4A,SOX13,TCP1,ZNF436	17
Cancer,Organismal Injury and Abnormalities	breast or colorectal cancer	Breast or colorectal cancer	0.00119	0.0357				ADAMTS4,ADAMTS6,BAZ2B,CBFA2T3,CYLD,CYYR1,ETS2,GADD45B,GPAM,GSE1,GSTM1,INSR,JCAD,KCNJ2,KCNJ8,LRRC30,MAZ,MBD4,MPP3,MYOD1,NFIL3,OSBPL6,PPP2R1B,PPP2R5A,RAPGEF2,RIPK2,SAMD4A,SLC9A3R2,SOX13,SPRY4,TCP1,ZNF436	32
Cell Morphology,Cellular Function and Maintenance	permeability	Permeability of colorectal cancer cell lines	0.00126	0.0357				AFDN,RAPGEF2	2
Cardiovascular Disease,Organismal Injury and Abnormalities	acute coronary event	Acute coronary event	0.00126	0.0357				CA4,GSTM1,INSR,KCNJ2	4
Cell Signaling	protein kinase cascade	Protein kinase cascade	0.00131	0.0357		1.346	1.187	CYLD,DUSP7,GADD45B,INSR,JCAD,RAPGEF2,RIPK2	7
Cell Death and Survival	cell death	Cell death of tumor cell lines	0.00134	0.0357		1.953	2.016	CYLD,DYNLL1,ETS2,GADD45B,GSTM1,INSR,NFIL3,PDGFC,PPP2R1B,RAPGEF2,RIPK2,SLC9A3R2,TCP1,TMBIM6	14
Cellular Function and Maintenance	function	Function of blood cells	0.00134	0.0357				ANO6,CYLD,GADD45B,NFIL3,RAPGEF2,RIPK2,SELENOK	7
Cell Death and Survival	activation-induced cell death	Activation-induced cell death	0.00147	0.0357				GADD45B,GPAM,RIPK2	3
Cellular Compromise,Cellular Function and Maintenance	endoplasmic reticulum stress response	Endoplasmic reticulum stress response	0.00153	0.0357				CREBRF,DNAJB5,RIPK2,TMBIM6	4
Cell Death and Survival	apoptosis	Apoptosis of T lymphocytes	0.00162	0.0357		-1.715	-1.695	CYLD,ETS2,GADD45B,GPAM,INSR	5
Neurological Disease,Organismal Injury and Abnormalities	seizure disorder	Seizure disorder	0.00171	0.0357				CA4,CITED2,CYYR1,DBP,DNAJB5,GADD45B,NFIL3	7
Carbohydrate Metabolism	incorporation	Incorporation of carbohydrate	0.00174	0.0357				GPAM,INSR	2
Connective Tissue Disorders,Developmental Disorder,Gastrointestinal Disease,Organismal Development,Organismal Injury and Abnormalities,Skeletal and Muscular Disorders	palatal shelves fail to meet at midline	Palatal shelves fail to meet at midline	0.00174	0.0357				KCNJ2,PDGFC	2
Cardiovascular Disease,Organismal Injury and Abnormalities	failure	Failure of heart	0.00175	0.0357				CA4,INSR,KCNJ2,PPP2R1B,PPP2R5A	5
Cell Death and Survival	necrosis	Necrosis	0.00199	0.0357		1.819	1.898	CA4,CITED2,CYLD,DYNLL1,ETS2,GADD45B,GPAM,GSTM1,INSR,MBD4,MYOD1,NFIL3,PDGFC,PPP2R1B,RAPGEF2,RIPK2,SLC9A3R2,TCP1,TMBIM6	19
Organismal Injury and Abnormalities	formation	Formation of ulcer	0.002	0.0357				CYLD,NFIL3	2
Lipid Metabolism,Molecular Transport,Small Molecule Biochemistry	secretion	Secretion of lipid	0.00211	0.0357		0	-0.155	Akr1c14,CITED2,GPAM,NFIL3	4
Cell Cycle,Gene Expression	binding	Binding of E box motif	0.00214	0.0357				ETS2,MYOD1	2
Endocrine System Development and Function,Lipid Metabolism,Molecular Transport,Small Molecule Biochemistry	secretion	Secretion of aldosterone	0.00229	0.0357				CITED2,NFIL3	2
Lipid Metabolism,Small Molecule Biochemistry	mass	Mass of lipid	0.00229	0.0357				GPAM,INSR	2
Cell-To-Cell Signaling and Interaction,Inflammatory Response,Organismal Injury and Abnormalities	rejection	Rejection of splenocytes	0.00229	0.0357				NFIL3	1
Cardiovascular Disease,Hereditary Disorder,Organismal Injury and Abnormalities,Skeletal and Muscular Disorders	familial atrial fibrillation type 9	Familial atrial fibrillation type 9	0.00229	0.0357				KCNJ2	1
Tissue Development	morphogenesis	Morphogenesis of acinus	0.00229	0.0357				CBFA2T3	1
Developmental Disorder,Endocrine System Disorders,Hereditary Disorder,Metabolic Disease,Organismal Injury and Abnormalities	leprechaunism	Leprechaunism	0.00229	0.0357				INSR	1
Cell Morphology	conversion	Conversion of myotube	0.00229	0.0357				MYOD1	1
Cell Cycle,Hair and Skin Development and Function	G1/S phase transition	Delay in G1/S phase transition of keratinocytes	0.00229	0.0357				CYLD	1
Cardiovascular System Development and Function	perfusion pressure	Perfusion pressure of heart	0.00229	0.0357				KCNJ8	1
Connective Tissue Development and Function,Hematological System Development and Function,Lymphoid Tissue Structure and Development,Organismal Development,Tissue Morphology	quantity	Quantity of peripheral blood natural killer cells	0.00229	0.0357				NFIL3	1
Hair and Skin Development and Function,Organ Morphology	curvature	Curvature of zigzag hair	0.00229	0.0357				ETS2	1
Cell Death and Survival,Cell Morphology,Hematopoiesis,Lymphoid Tissue Structure and Development	loss	Loss of innate lymphoid precursor cells	0.00229	0.0357				NFIL3	1
Organismal Injury and Abnormalities	calcification	Calcification of placenta	0.00229	0.0357				INSR	1
Embryonic Development,Organismal Development,Tissue Development	specification	Specification of adrenogonadal primordium	0.00229	0.0357				CITED2	1
Cell-To-Cell Signaling and Interaction,Hematological System Development and Function,Immune Cell Trafficking,Inflammatory Response	cross-priming	Cross-priming of CD8+ T lymphocyte	0.00229	0.0357				NFIL3	1
Organ Morphology,Skeletal and Muscular System Development and Function	conversion	Conversion of smooth muscle	0.00229	0.0357				MYOD1	1
Cell-To-Cell Signaling and Interaction,Hepatic System Development and Function	activation	Activation of oval cells	0.00229	0.0357				CYLD	1
Cell-To-Cell Signaling and Interaction,Nervous System Development and Function	targeting	Targeting of olfactory receptor neurons	0.00229	0.0357				KCNJ2	1
Hematological Disease,Immunological Disease	exhaustion	Exhaustion of CD4+ T-lymphocytes	0.00229	0.0357				ANO6	1
Cancer,Gastrointestinal Disease,Organismal Injury and Abnormalities	adenocarcinoma	Adenocarcinoma in distal colon	0.00229	0.0357				GSTM1	1
Developmental Disorder,Endocrine System Disorders,Hereditary Disorder,Neurological Disease,Organismal Injury and Abnormalities,Reproductive System Disease,Respiratory Disease	Kallmann syndrome type 17	Kallmann syndrome type 17	0.00229	0.0357				SPRY4	1
Metabolic Disease,Organismal Injury and Abnormalities	anapyrexia	Anapyrexia	0.00229	0.0357				DAGLA	1
Cardiovascular Disease,Developmental Disorder,Hereditary Disorder,Organismal Injury and Abnormalities	atrial septal defect type 8	Atrial septal defect type 8	0.00229	0.0357				CITED2	1
Hematological System Development and Function,Lymphoid Tissue Structure and Development,Organ Morphology,Organismal Development,Tissue Morphology	enlargement	Enlargement of mesenteric lymph node	0.00229	0.0357				CYLD	1
Cellular Function and Maintenance,Hematological System Development and Function	function	Function of type 2 innate lymphocyte	0.00229	0.0357				NFIL3	1
Connective Tissue Disorders,Developmental Disorder,Gastrointestinal Disease,Organismal Development,Organismal Injury and Abnormalities,Skeletal and Muscular Disorders	cleft palate syndrome	Cleft palate syndrome of secondary palate	0.00229	0.0357				PDGFC	1
Cardiovascular Disease,Hereditary Disorder,Organismal Injury and Abnormalities	short-QT syndrome 3	Short-QT syndrome 3	0.00229	0.0357				KCNJ2	1
Endocrine System Disorders,Gastrointestinal Disease,Metabolic Disease,Organismal Injury and Abnormalities	diabetic ketoacidosis	Diabetic ketoacidosis	0.00229	0.0357				INSR	1
Developmental Disorder,Organismal Injury and Abnormalities,Reproductive System Disease	virilization	Virilization	0.00229	0.0357				INSR	1
Developmental Disorder,Endocrine System Disorders,Hereditary Disorder,Neurological Disease,Organismal Injury and Abnormalities,Reproductive System Disease	susceptibility to hypogonadotropic hypogonadism type 17	Susceptibility to hypogonadotropic hypogonadism type 17	0.00229	0.0357				SPRY4	1
Cellular Movement,Hematological System Development and Function,Humoral Immune Response,Immune Cell Trafficking	distribution	Distribution of germinal center B lymphocytes	0.00229	0.0357				NFIL3	1
Cancer,Cardiovascular Disease,Organismal Injury and Abnormalities	growth	Growth of cardiovascular neoplasm	0.00229	0.0357				SLC9A3R2	1
Hematological System Development and Function,Lymphoid Tissue Structure and Development,Tissue Morphology	quantity	Quantity of lymphoid tissue inducer-like cells	0.00229	0.0357				NFIL3	1
Cancer,Dermatological Diseases and Conditions,Hereditary Disorder,Organismal Injury and Abnormalities	familial cylindromatosis	Autosomal dominant familial cylindromatosis	0.00229	0.0357				CYLD	1
Hair and Skin Development and Function,Organ Morphology	curvature	Curvature of awl hair	0.00229	0.0357				ETS2	1
Developmental Disorder,Endocrine System Disorders,Hereditary Disorder,Neurological Disease,Organismal Injury and Abnormalities,Reproductive System Disease	hypogonadotropic hypogonadism 17 without anosmia	Hypogonadotropic hypogonadism 17 without anosmia	0.00229	0.0357				SPRY4	1
Cell Cycle	G1/S phase transition	Delay in G1/S phase transition of pancreatic cancer cell lines	0.00229	0.0357				INSR	1
Cancer,Dermatological Diseases and Conditions,Hereditary Disorder,Organismal Injury and Abnormalities	multiple familial trichoepithelioma 1	Multiple familial trichoepithelioma 1	0.00229	0.0357				CYLD	1
Lipid Metabolism,Small Molecule Biochemistry	mobilization	Mobilization of 2-arachidonoylglycerol	0.00229	0.0357				DAGLA	1
Skeletal and Muscular System Development and Function	mineralization	Mineralization of rib	0.00229	0.0357				GADD45B	1
Cell Cycle,Skeletal and Muscular System Development and Function	cell cycle progression	Arrest in cell cycle progression of skeletal muscle cells	0.00229	0.0357				MYOD1	1
Embryonic Development,Tissue Development	proliferation	Proliferation of ectoplacental cone	0.00229	0.0357				ETS2	1
Endocrine System Disorders,Hematological Disease,Metabolic Disease,Organismal Injury and Abnormalities	hypoglycemia	Recurrent hypoglycemia	0.00229	0.0357				INSR	1
DNA Replication, Recombination, and Repair,Gene Expression	stabilization	Stabilization of microsatellite	0.00229	0.0357				MBD4	1
Connective Tissue Disorders,Endocrine System Disorders,Gastrointestinal Disease,Metabolic Disease,Organismal Injury and Abnormalities	lipoatrophic diabetes	Lipoatrophic diabetes	0.00229	0.0357				INSR	1
Cell-To-Cell Signaling and Interaction,Nervous System Development and Function	activation	Activation of olfactory receptor neurons	0.00229	0.0357				KCNJ2	1
Endocrine System Disorders,Hematological Disease,Metabolic Disease,Organismal Injury and Abnormalities	neonatal hypoglycemia	Neonatal hypoglycemia	0.00229	0.0357				INSR	1
Developmental Disorder,Organismal Injury and Abnormalities,Skeletal and Muscular Disorders	hypotrophy	Hypotrophy of skeletal muscle	0.00229	0.0357				INSR	1
Embryonic Development,Organismal Development,Tissue Development	formation	Formation of ectoplacental cone	0.00229	0.0357				ETS2	1
Hair and Skin Development and Function,Organ Morphology	curvature	Curvature of guard hair	0.00229	0.0357				ETS2	1
Embryonic Development	migration	Migration of trophoblast	0.00229	0.0357				ETS2	1
Hereditary Disorder,Ophthalmic Disease,Organismal Injury and Abnormalities	retinitis pigmentosa 17	Retinitis pigmentosa 17	0.00229	0.0357				CA4	1
Cellular Function and Maintenance	function	Function of bone marrow-derived dendritic cells	0.00229	0.0357				CYLD	1
Cell-mediated Immune Response,Cellular Movement,Hematological System Development and Function,Immune Cell Trafficking	distribution	Distribution of CD4+ T-lymphocytes	0.00229	0.0357				NFIL3	1
Cellular Function and Maintenance	function	Function of type 3 innate lymphoid cells	0.00229	0.0357				NFIL3	1
Endocrine System Disorders,Gastrointestinal Disease,Hereditary Disorder,Metabolic Disease,Organismal Injury and Abnormalities	pineal hyperplasia insulin-resistant diabetes mellitus	Pineal hyperplasia insulin-resistant diabetes mellitus	0.00229	0.0357				INSR	1
Hematological System Development and Function,Inflammatory Response,Tissue Morphology	quantity	Quantity of Anitschkow cells	0.00229	0.0357				PDGFC	1
Hematological Disease,Hereditary Disorder,Organismal Injury and Abnormalities	Scott syndrome	Scott syndrome	0.00229	0.0357				ANO6	1
Cell Morphology,Cellular Assembly and Organization	area	Area of lysosome	0.00229	0.0357				TMBIM6	1
Cardiovascular Disease,Developmental Disorder,Hereditary Disorder,Organismal Injury and Abnormalities	ventricular septal defect type 2	Ventricular septal defect type 2	0.00229	0.0357				CITED2	1
Cellular Assembly and Organization,Post-Translational Modification,Protein Folding	folding	Folding of actin	0.00229	0.0357				TCP1	1
Cellular Development,Hematological System Development and Function,Hematopoiesis	commitment	Commitment of natural killer precursor cells	0.00229	0.0357				NFIL3	1
Cell Death and Survival	apoptosis	Apoptosis of tumor-associated macrophages	0.00229	0.0357				PDGFC	1
Cancer,Organismal Injury and Abnormalities	transformation	Transformation of distal lung epithelial cells	0.00229	0.0357				PPP2R1B	1
Endocrine System Disorders,Gastrointestinal Disease,Hematological Disease,Hereditary Disorder,Metabolic Disease,Organismal Injury and Abnormalities	familial hyperinsulinemic hypoglycemia type 5	Familial hyperinsulinemic hypoglycemia type 5	0.00229	0.0357				INSR	1
Cancer,Cell Cycle,Organismal Injury and Abnormalities	G1/S phase transition	Delay in G1/S phase transition of melanoma cells	0.00229	0.0357				CYLD	1
Cell Cycle	S phase	Entry into S phase of muscle cell lines	0.00229	0.0357				MYOD1	1
Dermatological Diseases and Conditions,Endocrine System Disorders,Gastrointestinal Disease,Hereditary Disorder,Metabolic Disease,Organismal Injury and Abnormalities	insulin-resistant diabetes mellitus and acanthosis nigricans	Insulin-resistant diabetes mellitus and acanthosis nigricans	0.00229	0.0357				INSR	1
Cancer,Dermatological Diseases and Conditions,Hereditary Disorder,Organismal Injury and Abnormalities	Brooke-Spiegler syndrome	Autosomal dominant Brooke-Spiegler syndrome	0.00229	0.0357				CYLD	1
Hair and Skin Development and Function,Organ Morphology	curvature	Curvature of auchene hair	0.00229	0.0357				ETS2	1
Cell Death and Survival	cell death	Cell death of fibroblast cell lines	0.00235	0.0364				CA4,CYLD,GADD45B,INSR,PPP2R1B,SLC9A3R2	6
Cardiovascular Disease,Organismal Injury and Abnormalities	disorder of coronary artery	Disorder of coronary artery	0.00257	0.0393				CA4,INSR,KCNJ2,KCNJ8,SAMD4A	5
Cardiovascular System Development and Function,Embryonic Development,Organ Development,Organismal Development,Tissue Development	development	Development of heart septum	0.00262	0.0396				ADAMTS6,CITED2,PDGFC	3
Cardiovascular Disease,Organismal Injury and Abnormalities	ischemia	Ischemia of heart	0.00263	0.0396				GSTM1,INSR,KCNJ2,PPP2R5A	4
Cell Signaling	MAPKKK cascade	MAPKKK cascade	0.0027	0.04				DUSP7,GADD45B,INSR,JCAD,RAPGEF2	5
Neurological Disease,Organismal Injury and Abnormalities	epileptic seizure	Epileptic seizure	0.0027	0.04				CITED2,DNAJB5,GADD45B,NFIL3	4
Organismal Injury and Abnormalities,Skeletal and Muscular Disorders	paramyotonia congenita or sodium channel myotonia	Paramyotonia congenita or sodium channel myotonia	0.00275	0.0403				CA4,KCNJ8	2
Hematological System Development and Function,Tissue Morphology	quantity	Quantity of blood cells	0.00301	0.0429		-0.503	-0.639	CBFA2T3,CYLD,ETS2,GADD45B,INSR,NFIL3,PDGFC,RAPGEF2,RIPK2,SOX13	10
Connective Tissue Disorders,Immunological Disease,Inflammatory Disease,Inflammatory Response,Organismal Injury and Abnormalities,Renal and Urological Disease,Skeletal and Muscular Disorders	systemic lupus erythematosus nephritis	Systemic lupus erythematosus nephritis	0.00308	0.0429				ADAMTS6,GSTM1	2
Cancer,Organismal Injury and Abnormalities	neck neoplasm	Neck neoplasm	0.00321	0.0429				ADAMTS4,ADAMTS6,ANO6,BAZ2B,CA4,CBFA2T3,CITED2,CREBRF,CYLD,CYYR1,DAGLA,DBP,DNAJB5,DUSP7,DYNC1LI2,ETS2,GADD45B,GPAM,GSE1,GSTM1,INSR,KCNJ2,LRRC30,MAZ,MBD4,MPP3,MYOD1,OSBPL6,PPP2R1B,PPP2R5A,RAPGEF2,RIPK2,SAMD4A,SELENOK,SLC9A2,SLC9A3R2,SOX13,TCP1,TMBIM6,TMEM100	40
Cellular Development,Cellular Growth and Proliferation	colony formation	Colony formation of stomach cancer cell lines	0.00325	0.0429				GSE1,INSR	2
Cell Death and Survival	cell death	Cell death of connective tissue cells	0.00348	0.0429		1.969	1.954	CA4,CYLD,GADD45B,INSR,MBD4,PPP2R1B,SLC9A3R2	7
Cell Death and Survival	apoptosis	Apoptosis of leukocytes	0.0035	0.0429		-0.689	-0.654	CYLD,ETS2,GADD45B,GPAM,INSR,PDGFC	6
Humoral Immune Response,Protein Synthesis	quantity	Quantity of IgG	0.0035	0.0429		-0.943	-1.001	CYLD,GADD45B,NFIL3,RIPK2	4
Cellular Development,Cellular Growth and Proliferation,Hematological System Development and Function,Hematopoiesis,Lymphoid Tissue Structure and Development,Tissue Development	hematopoiesis	Hematopoiesis of phagocytes	0.0035	0.0429				CBFA2T3,ETS2,MYOD1,NFIL3	4
Cancer,Endocrine System Disorders,Organismal Injury and Abnormalities	endocrine gland tumor	Endocrine gland tumor	0.00358	0.0429				ADAMTS4,ADAMTS6,ANO6,BAZ2B,CA4,CBFA2T3,CITED2,CREBRF,CYLD,CYYR1,DAGLA,DBP,DNAJB5,DUSP7,DYNC1LI2,ETS2,GADD45B,GPAM,GSE1,GSTM1,INSR,KCNJ2,LRRC30,MAZ,MBD4,MPP3,MYOD1,OSBPL6,PPP2R1B,PPP2R5A,RAPGEF2,RIPK2,SAMD4A,SELENOK,SLC9A2,SLC9A3R2,SOX13,TCP1,TMBIM6,ZNF436	40
Cancer,Organismal Injury and Abnormalities	breast or pancreatic cancer	Breast or pancreatic cancer	0.00366	0.0429				ADAMTS4,ADAMTS6,BAZ2B,CREBRF,CYLD,CYYR1,ETS2,FOXN2,GADD45B,GPAM,GSTM1,INSR,JCAD,LRRC30,MAZ,MBD4,MPP3,NFIL3,OSBPL6,PPP2R1B,RAPGEF2,RIPK2,SAMD4A,SOX13,TCP1,ZNF436	26
Cancer,Gastrointestinal Disease,Organismal Injury and Abnormalities	upper gastrointestinal carcinoma	Upper gastrointestinal carcinoma	0.00377	0.0429				ADAMTS6,BAZ2B,CITED2,CYLD,DNAJB5,FOXN2,GPAM,GSE1,GSTM1,JCAD,MBD4,MPP3,OSBPL6,PDGFC,PPP2R5A,SAMD4A,TCP1,ZNF436	18
Cancer,Organismal Injury and Abnormalities	abdominal carcinoma	Abdominal carcinoma	0.00378	0.0429				ADAMTS4,ADAMTS6,ANO6,BAZ2B,CA4,CBFA2T3,CITED2,CREBRF,CYLD,CYYR1,DAGLA,DNAJB5,DUSP7,DYNC1LI2,DYNLL1,ETS2,FOXN2,GPAM,GSE1,GSTM1,INSR,JCAD,KCNJ2,KCNJ8,LRRC30,MAZ,MBD4,MPP3,MYOD1,NFIL3,OSBPL6,PDGFC,PPP2R1B,PPP2R5A,RAPGEF2,RIPK2,SAMD4A,SELENOK,SLC9A2,SLC9A3R2,SOX13,SPRY4,TCP1,TMBIM6,ZNF436	45
Cell-To-Cell Signaling and Interaction,Hematological System Development and Function,Immune Cell Trafficking,Inflammatory Response	activation	Activation of CD8+ T lymphocyte	0.00379	0.0429				ANO6,NFIL3	2
Cell Death and Survival,Reproductive System Development and Function	cell viability	Cell viability of breast cell lines	0.00379	0.0429				ETS2,NFIL3	2
Endocrine System Disorders,Gastrointestinal Disease,Metabolic Disease,Organismal Injury and Abnormalities	adult-onset diabetes mellitus	Adult-onset diabetes mellitus	0.00379	0.0429				CA4,INSR	2
Cardiovascular Disease,Organismal Injury and Abnormalities,Skeletal and Muscular Disorders	acute myocardial infarction	Acute myocardial infarction	0.00397	0.0429				GSTM1,INSR,KCNJ2	3
Cancer,Organismal Injury and Abnormalities	carcinoma	Carcinoma	0.00401	0.0429				ADAMTS4,ADAMTS6,ANO6,BAZ2B,CA4,CBFA2T3,CITED2,CREBRF,CYLD,CYYR1,DAGLA,DBP,DNAJB5,DUSP7,DYNC1LI2,DYNLL1,ETS2,FOXN2,GADD45B,GPAM,GSE1,GSTM1,INSR,JCAD,KCNJ2,KCNJ8,LRRC30,MAZ,MBD4,MPP3,MYOD1,NFIL3,OSBPL6,PDGFC,PPP2R1B,PPP2R5A,RAPGEF2,RIPK2,SAMD4A,SELENOK,SLC9A2,SLC9A3R2,SOX13,SPRY4,TCP1,TMBIM6,TMEM100,ZNF436	48
Molecular Transport	transport	Transport of molecule	0.00412	0.0429		1.327	1.124	Akr1c14,ANO6,CA4,CITED2,CREBRF,GPAM,INSR,KCNJ2,KCNJ8,NFIL3,SELENOK,SLC9A2,SLC9A3R2	13
Cell Death and Survival	cell viability	Cell viability of cervical cancer cell lines	0.00423	0.0429		-1	-1.237	DUSP7,PPP2R1B,PPP2R5A,TCP1	4
Neurological Disease,Organismal Injury and Abnormalities	seizures	Seizures	0.00424	0.0429				CA4,CITED2,CYYR1,DNAJB5,GADD45B,NFIL3	6
Cellular Development,Cellular Growth and Proliferation,Hematological System Development and Function,Hematopoiesis,Lymphoid Tissue Structure and Development,Tissue Development	myelopoiesis	Myelopoiesis of leukocytes	0.00434	0.0429				CBFA2T3,CITED2,ETS2,MYOD1	4
Hematological System Development and Function,Tissue Morphology	quantity	Quantity of leukocytes	0.00449	0.0429		-0.843	-0.976	CBFA2T3,CYLD,ETS2,GADD45B,INSR,NFIL3,PDGFC,RIPK2,SOX13	9
Connective Tissue Disorders,Developmental Disorder,Neurological Disease,Organismal Injury and Abnormalities,Skeletal and Muscular Disorders	spina bifida	Spina bifida	0.00456	0.0429				PDGFC,RAPGEF2	2
Cell Cycle,Skeletal and Muscular System Development and Function	cell cycle progression	Arrest in cell cycle progression of myoblasts	0.00457	0.0429				MYOD1	1
Cardiovascular Disease,Cellular Compromise,Organ Morphology,Organismal Injury and Abnormalities,Skeletal and Muscular Disorders	oxidative stress response	Oxidative stress response of cardiomyocytes	0.00457	0.0429				INSR	1
Cell Morphology,Hair and Skin Development and Function	ruffling	Ruffling of epithelial cell lines	0.00457	0.0429				INSR	1
Neurological Disease,Psychological Disorders	amnestic mild cognitive impairment	Amnestic mild cognitive impairment	0.00457	0.0429				INSR	1
Cardiovascular Disease,Developmental Disorder,Hereditary Disorder,Organismal Injury and Abnormalities	Andersen syndrome	Andersen syndrome	0.00457	0.0429				KCNJ2	1
Cell Cycle	cell cycle progression	Re-entry into cell cycle progression of cervical cancer cell lines	0.00457	0.0429				TCP1	1
Developmental Disorder,Embryonic Development	deficiency	Deficiency of mesenchyme	0.00457	0.0429				PDGFC	1
Endocrine System Disorders,Hereditary Disorder,Metabolic Disease,Organismal Injury and Abnormalities	severe familial insulin resistance	Severe familial insulin resistance	0.00457	0.0429				INSR	1
Cardiovascular System Development and Function,Cellular Development,Embryonic Development,Organismal Development,Tissue Development	differentiation	Differentiation of mesoangioblast	0.00457	0.0429				MYOD1	1
Cardiovascular Disease,Hereditary Disorder,Organismal Injury and Abnormalities,Skeletal and Muscular Disorders	early repolarization syndrome	Early repolarization syndrome	0.00457	0.0429				KCNJ8	1
Cancer,Endocrine System Disorders,Organismal Injury and Abnormalities	tumorigenesis	Tumorigenesis of neuroendocrine carcinoma	0.00457	0.0429				GSTM1	1
Cellular Assembly and Organization	transport	Transport of liposome	0.00457	0.0429				INSR	1
Connective Tissue Disorders,Dermatological Diseases and Conditions,Developmental Disorder,Hereditary Disorder,Metabolic Disease,Organismal Injury and Abnormalities,Skeletal and Muscular Disorders	Ehlers-Danlos syndrome type VIIC	Ehlers-Danlos syndrome type VIIC	0.00457	0.0429				ADAMTS4	1
Cell-To-Cell Signaling and Interaction,Nervous System Development and Function	silencing	Silencing of neurons	0.00457	0.0429				KCNJ2	1
Cell Morphology,Cellular Assembly and Organization,Cellular Development,Cellular Function and Maintenance,Cellular Growth and Proliferation,Nervous System Development and Function,Organismal Development,Tissue Development	development	Development of callosal axon	0.00457	0.0429				KCNJ2	1
Cellular Development,Hematological System Development and Function,Hematopoiesis	commitment	Commitment of common lymphoid progenitor cells	0.00457	0.0429				NFIL3	1
Lipid Metabolism,Small Molecule Biochemistry	mass	Mass of triacylglycerol	0.00457	0.0429				GPAM	1
Cell Morphology,Organ Morphology,Skeletal and Muscular System Development and Function,Tissue Morphology	morphology	Morphology of myoblasts	0.00457	0.0429				MYOD1	1
Cellular Development,Cellular Growth and Proliferation,Nervous System Development and Function,Tissue Development	development	Development of projection neurons	0.00457	0.0429				KCNJ2	1
Cellular Movement	beat	Beat of sperm	0.00457	0.0429				CA4	1
Antigen Presentation,Cell-To-Cell Signaling and Interaction,Inflammatory Response	allostimulatory capacity	Allostimulatory capacity of bone marrow-derived dendritic cells	0.00457	0.0429				CYLD	1
Cell Death and Survival	activation-induced cell death	Activation-induced cell death of T lymphoblasts	0.00457	0.0429				GADD45B	1
Connective Tissue Development and Function,Tissue Development	accumulation	Accumulation of epididymal fat	0.00457	0.0429				RIPK2	1
Cellular Assembly and Organization	stabilization	Stabilization of centrosome	0.00457	0.0429				DYNC1LI2	1
Cellular Development,Cellular Growth and Proliferation,Hematological System Development and Function,Hematopoiesis,Lymphoid Tissue Structure and Development,Tissue Development	development	Development of conventional dendritic cells	0.00457	0.0429				NFIL3	1
Connective Tissue Disorders,Developmental Disorder,Hereditary Disorder,Ophthalmic Disease,Organismal Injury and Abnormalities,Skeletal and Muscular Disorders	STAR syndrome	STAR syndrome	0.00457	0.0429				ETS2	1
Cell Morphology,Cellular Development,Skeletal and Muscular System Development and Function	conversion	Conversion of myoblasts	0.00457	0.0429				MYOD1	1
Cellular Assembly and Organization,Cellular Compromise	formation	Delay in initiation of formation of cellular inclusion bodies	0.00457	0.0429				TCP1	1
Cancer,Organismal Injury and Abnormalities,Skeletal and Muscular Disorders	primary embryonal rhabdomyosarcoma	Primary embryonal rhabdomyosarcoma	0.00457	0.0429				PDGFC	1
Embryonic Development,Organ Development,Organ Morphology,Organismal Development,Organismal Injury and Abnormalities,Respiratory Disease,Respiratory System Development and Function,Tissue Development	abnormal morphology	Abnormal morphology of lung lobe	0.00457	0.0429				CITED2	1
Connective Tissue Development and Function,Embryonic Development,Organ Development,Organismal Development,Skeletal and Muscular System Development and Function,Tissue Development	development	Development of acromion	0.00457	0.0429				PDGFC	1
Embryonic Development,Organismal Development,Tissue Development	growth	Growth of metanephros	0.00457	0.0429				INSR	1
Connective Tissue Development and Function,Connective Tissue Disorders,Organ Morphology,Organismal Injury and Abnormalities,Skeletal and Muscular Disorders,Skeletal and Muscular System Development and Function,Tissue Development	shortening	Shortening of sternum	0.00457	0.0429				PDGFC	1
Cellular Development,Cellular Growth and Proliferation,Embryonic Development,Organ Development,Organismal Development,Skeletal and Muscular System Development and Function,Tissue Development	myogenesis	Initiation of myogenesis of embryonic cell lines	0.00457	0.0429				MYOD1	1
Cell Death and Survival,Cell Morphology,Nervous System Development and Function,Neurological Disease	loss	Loss of ependymal cells	0.00457	0.0429				AFDN	1
Cellular Development,Tissue Development	fate determination	Fate determination of myoblasts	0.00457	0.0429				MYOD1	1
Embryonic Development,Hair and Skin Development and Function,Organ Development,Organismal Development,Tissue Development	development	Development of vibrissae	0.00457	0.0429				ETS2	1
Cellular Compromise	acidification	Acidification of cytosol	0.00457	0.0429				CA4	1
Cell Cycle	cell cycle progression	Cell cycle progression of endometrial cancer cell lines	0.00457	0.0429				INSR	1
Cellular Development,Cellular Growth and Proliferation,Connective Tissue Development and Function,Embryonic Development,Organ Development,Organismal Development,Skeletal and Muscular System Development and Function,Tissue Development	myogenesis	Initiation of myogenesis of fibroblast cell lines	0.00457	0.0429				MYOD1	1
Cellular Development,Cellular Growth and Proliferation,Connective Tissue Development and Function,Embryonic Development,Organ Development,Organismal Development,Skeletal and Muscular System Development and Function,Tissue Development	myogenesis	Myogenesis of fibroblasts	0.00457	0.0429				MYOD1	1
Cell Morphology,Endocrine System Development and Function	intracellular pH	Intracellular pH of acinar gland cells	0.00457	0.0429				SLC9A2	1
Antimicrobial Response,Inflammatory Response	antiviral response	Antiviral response	0.00466	0.0436				GPAM,KCNJ8,SELENOK,SPRY4	4
Hereditary Disorder,Organismal Injury and Abnormalities,Skeletal and Muscular Disorders	familial myotonic disorder	Familial myotonic disorder	0.00477	0.0442				CA4,KCNJ8	2
Cellular Function and Maintenance	function	Function of antigen presenting cells	0.00478	0.0442				CYLD,GADD45B,RIPK2,SELENOK	4
Humoral Immune Response,Protein Synthesis	quantity	Quantity of IgG1	0.00491	0.0447				CYLD,GADD45B,NFIL3	3
Organismal Survival	morbidity or mortality	Morbidity or mortality	0.00498	0.0447		-0.908	-0.4	ADAMTS4,AFDN,CA4,CITED2,CYLD,ETS2,GSE1,GSTM1,INSR,KCNJ2,KCNJ8,MYOD1,NFIL3,PDGFC,RAPGEF2,SELENOK,SPRY4	17
Cellular Function and Maintenance,Hematological System Development and Function	function	Function of Th1 cells	0.00498	0.0447				GADD45B,RIPK2	2
Cardiovascular Disease,Hereditary Disorder,Organismal Injury and Abnormalities	inherited primary arrhythmia syndrome	Inherited primary arrhythmia syndrome	0.00498	0.0447				KCNJ2,KCNJ8	2
Tissue Morphology	quantity	Quantity of cells	0.00498	0.0447		0.594	0.404	ADAMTS4,CBFA2T3,CITED2,CYLD,DYNLL1,ETS2,GADD45B,INSR,MYOD1,NFIL3,PDGFC,RAPGEF2,RIPK2,SOX13	14
Cell Death and Survival	apoptosis	Apoptosis	0.00502	0.0447		0.316	0.424	ANO6,CA4,CITED2,CYLD,DYNLL1,ETS2,GADD45B,GPAM,INSR,MBD4,MYOD1,NFIL3,PDGFC,PPP2R1B,RAPGEF2,RIPK2,TCP1,TMBIM6	18
Cell Death and Survival	apoptosis	Apoptosis of tumor cell lines	0.00502	0.0447		0.872	0.928	CYLD,DYNLL1,ETS2,GADD45B,INSR,NFIL3,PDGFC,RAPGEF2,RIPK2,TCP1,TMBIM6	11
Lymphoid Tissue Structure and Development,Tissue Morphology	quantity	Quantity of lymphatic system cells	0.00506	0.0448		-0.132	-0.283	CBFA2T3,CYLD,ETS2,GADD45B,NFIL3,RAPGEF2,RIPK2,SOX13	8
Embryonic Development,Endocrine System Development and Function,Organ Development,Organismal Development,Tissue Development	formation	Formation of adrenal gland	0.00519	0.0458				CITED2,INSR	2
Digestive System Development and Function,Gastrointestinal Disease,Organ Morphology,Organismal Development,Organismal Injury and Abnormalities	abnormal morphology	Abnormal morphology of colon	0.00541	0.0471				CYLD,NFIL3	2
Cell Cycle	mitosis	Mitosis	0.00542	0.0471				CYLD,DYNC1LI2,GADD45B,INSR,Stard9,TCP1	6
Cancer,Organismal Injury and Abnormalities,Respiratory Disease	upper airway cancer	Upper airway cancer	0.00542	0.0471				CYLD,FOXN2,JCAD,KCNJ2,MPP3,SLC9A2,TMEM100,ZNF436	8
Cancer,Endocrine System Disorders,Organismal Injury and Abnormalities	epithelial thyroid cancer	Thyroid carcinoma	0.00552	0.0477				ADAMTS4,ADAMTS6,ANO6,BAZ2B,CA4,CBFA2T3,CITED2,CREBRF,CYLD,CYYR1,DAGLA,DBP,DNAJB5,DUSP7,DYNC1LI2,ETS2,GADD45B,GPAM,GSE1,GSTM1,INSR,KCNJ2,LRRC30,MAZ,MBD4,MPP3,MYOD1,OSBPL6,PPP2R1B,PPP2R5A,RAPGEF2,RIPK2,SAMD4A,SELENOK,SLC9A2,SLC9A3R2,SOX13,TCP1,TMBIM6	39
Cardiovascular Disease,Organismal Injury and Abnormalities,Skeletal and Muscular Disorders	myocardial infarction	Myocardial infarction	0.00561	0.048				CA4,GSTM1,INSR,KCNJ2	4
Hematological System Development and Function,Organismal Development,Tissue Morphology	quantity	Quantity of blood	0.00561	0.048		0.781	0.744	CBFA2T3,CYLD,NFIL3,RAPGEF2	4
Antimicrobial Response,Inflammatory Response	antimicrobial response	Antimicrobial response	0.00569	0.0484				ADAMTS4,GPAM,KCNJ8,SELENOK,SPRY4	5
Cell Death and Survival,Organismal Injury and Abnormalities	cell death	Cell death of epithelial cells	0.00599	0.0486		1	0.984	CITED2,CYLD,DYNLL1,GADD45B,INSR,TMBIM6	6
Cancer,Organismal Injury and Abnormalities	development	Development of malignant tumor	0.00604	0.0486				ADAMTS4,AFDN,BAZ2B,CBFA2T3,CREBRF,CYLD,CYYR1,DAGLA,DNAJB5,ETS2,FOXN2,GADD45B,GSE1,GSTM1,INSR,JCAD,LRRC30,MAZ,MBD4,MPP3,MYOD1,NFIL3,OSBPL6,PDGFC,PPP2R5A,RAPGEF2,RIPK2,SAMD4A,SELENOK,SLC9A2,SLC9A3R2,SOX13,SPRY4,TCP1,ZNF436	35
Cell Death and Survival	cell death	Cell death of immune cells	0.00627	0.0486		-0.666	-0.711	CYLD,ETS2,GADD45B,GPAM,INSR,NFIL3,PDGFC	7
Cancer,Gastrointestinal Disease,Organismal Injury and Abnormalities	colon cancer	Colon cancer	0.00631	0.0486				ADAMTS4,BAZ2B,CBFA2T3,CYLD,CYYR1,GSE1,GSTM1,INSR,JCAD,KCNJ8,LRRC30,MAZ,MBD4,MPP3,MYOD1,OSBPL6,PPP2R1B,PPP2R5A,RAPGEF2,RIPK2,SAMD4A,SLC9A3R2,SPRY4,TCP1	24
Lipid Metabolism,Small Molecule Biochemistry	metabolism	Metabolism of diacylglycerol	0.00632	0.0486				DAGLA,GPAM	2
Embryonic Development,Organismal Development	sex determination	Sex determination	0.00632	0.0486				CITED2,INSR	2
Molecular Transport	transport	Transport of cation	0.00654	0.0486				ANO6,KCNJ2,KCNJ8,SELENOK,SLC9A2	5
Carbohydrate Metabolism,Energy Production,Small Molecule Biochemistry	oxidation	Oxidation of D-glucose	0.00656	0.0486				CITED2,INSR	2
Cell Morphology,Lymphoid Tissue Structure and Development	morphology	Morphology of lymphatic system cells	0.00668	0.0486				ANO6,CBFA2T3,CYLD,NFIL3	4
Inflammatory Response	inflammation	Inflammation of body cavity	0.0068	0.0486		0.199	0.331	ADAMTS6,CYLD,GADD45B,GSTM1,INSR,MAZ,NFIL3,RIPK2,SLC9A2	9
Neurological Disease,Organismal Injury and Abnormalities,Psychological Disorders	intraparenchymal hemorrhage	Intraparenchymal hemorrhage	0.00685	0.0486				INSR	1
Cellular Development	differentiation	Arrest in differentiation of hematopoietic cell lines	0.00685	0.0486				CBFA2T3	1
Cell Cycle,Embryonic Development	cell cycle progression	Re-entry into cell cycle progression of embryonic cell lines	0.00685	0.0486				MYOD1	1
Cellular Development	differentiation	Arrest in differentiation of bone marrow cell lines	0.00685	0.0486				CBFA2T3	1
Lipid Metabolism,Small Molecule Biochemistry	incorporation	Incorporation of cholesterol ester	0.00685	0.0486				GPAM	1
Molecular Transport,Small Molecule Biochemistry	secretion	Secretion of aldesleukin	0.00685	0.0486				GPAM	1
Small Molecule Biochemistry	incorporation	Incorporation of acetate	0.00685	0.0486				GPAM	1
Cardiovascular System Development and Function,Embryonic Development,Organismal Development,Tissue Development	development	Development of aortic trunk	0.00685	0.0486				CITED2	1
Endocrine System Disorders,Gastrointestinal Disease,Metabolic Disease,Organismal Injury and Abnormalities	cystic fibrosis-related diabetes	Cystic fibrosis-related diabetes	0.00685	0.0486				INSR	1
Cancer,Hereditary Disorder,Organismal Injury and Abnormalities,Respiratory Disease	lung cancer	Autosomal recessive lung cancer	0.00685	0.0486				PPP2R1B	1
Cell-To-Cell Signaling and Interaction,Skeletal and Muscular System Development and Function	activation	Activation of myoblasts	0.00685	0.0486				MYOD1	1
Cardiovascular System Development and Function,Organismal Development	re-endothelialization	Re-endothelialization of femoral artery	0.00685	0.0486				INSR	1
Developmental Disorder,Endocrine System Disorders,Organismal Injury and Abnormalities,Reproductive System Disease	growth hormone deficiency with pituitary anomalies	Growth hormone deficiency with pituitary anomalies	0.00685	0.0486				INSR	1
Embryonic Development	migration	Migration of mesoderm	0.00685	0.0486				AFDN	1
Cellular Development,Cellular Growth and Proliferation,Hematological System Development and Function,Hematopoiesis,Lymphoid Tissue Structure and Development,Tissue Development	differentiation	Arrest in differentiation of granulocytes	0.00685	0.0486				CBFA2T3	1
Connective Tissue Disorders,Inflammatory Disease,Inflammatory Response,Organismal Injury and Abnormalities,Skeletal and Muscular Disorders	experimentally-induced arthritis	Experimentally-induced arthritis of knee joint	0.00685	0.0486				RIPK2	1
Metabolic Disease,Organismal Injury and Abnormalities	AA amyloidosis	AA amyloidosis	0.00685	0.0486				MAZ	1
Cell-To-Cell Signaling and Interaction,Cellular Assembly and Organization,Cellular Function and Maintenance	formation	Formation of spot-like adhesion site	0.00685	0.0486				AFDN	1
Nervous System Development and Function,Tissue Development	branching	Branching of axon bundle	0.00685	0.0486				MYOD1	1
Cardiovascular Disease,Organismal Injury and Abnormalities	right atrial isomerism	Right atrial isomerism	0.00685	0.0486				CITED2	1
Cellular Development	differentiation	Delay in initiation of differentiation of induced pluripotent stem cells	0.00685	0.0486				DUSP7	1
Cell Morphology,Cellular Development,Embryonic Development	conversion	Conversion of embryonic cell lines	0.00685	0.0486				MYOD1	1
Cell Cycle	G2/M phase	Arrest in G2/M phase of bone marrow cells	0.00685	0.0486				GADD45B	1
Cell Morphology,Cellular Assembly and Organization	length	Length of actin stress fibers	0.00685	0.0486				INSR	1
Organismal Development,Reproductive System Development and Function	development	Development of ovotestis	0.00685	0.0486				INSR	1
Skeletal and Muscular System Development and Function	mineralization	Mineralization of tibia	0.00685	0.0486				GADD45B	1
Cell-mediated Immune Response,Cellular Development,Cellular Function and Maintenance,Cellular Growth and Proliferation,Embryonic Development,Hematological System Development and Function,Hematopoiesis,Lymphoid Tissue Structure and Development,Organ Development,Organismal Development,Tissue Development	generation	Generation of natural killer precursor cells	0.00685	0.0486				NFIL3	1
Lipid Metabolism,Small Molecule Biochemistry	metabolism	Metabolism of stearic acid	0.00685	0.0486				DBP	1
Embryonic Development	regression	Regression of hyaloid vessel	0.00685	0.0486				PDGFC	1
Molecular Transport	transport	Transport of ion	0.00686	0.0486				ANO6,CA4,KCNJ2,KCNJ8,SELENOK,SLC9A2	6
Cancer,Organismal Injury and Abnormalities	cancer	Cancer	0.00695	0.049		0.867	0.847	ADAMTS4,ADAMTS6,AFDN,ANO6,BAZ2B,CA4,CBFA2T3,CITED2,CREBRF,CYLD,CYYR1,DAGLA,DBP,DNAJB5,DUSP7,DYNC1LI2,DYNLL1,ETS2,FOXN2,GADD45B,GPAM,GSE1,GSTM1,INSR,JCAD,KCNJ2,KCNJ8,LRRC30,MAZ,MBD4,MPP3,MYOD1,NFIL3,OSBPL6,PDGFC,PPP2R1B,PPP2R5A,RAPGEF2,RIPK2,SAMD4A,SELENOK,SLC9A2,SLC9A3R2,SOX13,SPRY4,TCP1,TMBIM6,TMEM100,ZNF436	49
Cardiovascular System Development and Function,Ophthalmic Disease,Organismal Development,Organismal Injury and Abnormalities,Visual System Development and Function	retinal neovascularization	Retinal neovascularization	0.00705	0.0495				INSR,PDGFC	2
Organismal Injury and Abnormalities,Reproductive System Disease	endometriosis	Endometriosis	0.00707	0.0495				CITED2,DBP,DYNLL1,INSR,NFIL3	5
Cellular Development,Cellular Growth and Proliferation,Hematological System Development and Function,Hematopoiesis,Lymphoid Tissue Structure and Development,Tissue Development	leukopoiesis	Leukopoiesis	0.0071	0.0495		-1.409	-1.58	CBFA2T3,CITED2,CYLD,ETS2,GADD45B,MYOD1,NFIL3,RIPK2	8
Cellular Function and Maintenance	function	Function of phagocytes	0.00719	0.0499				CYLD,GADD45B,RIPK2,SELENOK	4
Developmental Disorder,Skeletal and Muscular Disorders	syndactyly	Syndactyly	0.0073	0.0505				ETS2,SPRY4	2
Cancer,Organismal Injury and Abnormalities	upper aero-digestive squamous cell carcinoma	Upper aero-digestive squamous cell carcinoma	0.00752	0.0518				ADAMTS6,BAZ2B,CITED2,DNAJB5,JCAD,KCNJ2,MPP3,PPP2R5A,SAMD4A,SLC9A2,TCP1,TMEM100	12
Cell Cycle	cell cycle progression	Re-entry into cell cycle progression	0.00756	0.0518				MYOD1,TCP1	2
Cancer,Organismal Injury and Abnormalities	adenocarcinoma	Adenocarcinoma	0.00773	0.0528				ADAMTS4,ADAMTS6,ANO6,BAZ2B,CBFA2T3,CITED2,CREBRF,CYLD,CYYR1,DAGLA,DNAJB5,DUSP7,DYNC1LI2,ETS2,FOXN2,GADD45B,GPAM,GSE1,GSTM1,INSR,JCAD,KCNJ2,KCNJ8,LRRC30,MAZ,MBD4,MPP3,MYOD1,NFIL3,OSBPL6,PDGFC,PPP2R5A,RAPGEF2,RIPK2,SAMD4A,SELENOK,SLC9A2,SLC9A3R2,SOX13,SPRY4,TCP1,TMBIM6,ZNF436	43
Inflammatory Response	inflammation	Inflammation of absolute anatomical region	0.00786	0.0535		0.256	0.351	ADAMTS6,CA4,CYLD,GADD45B,GSTM1,INSR,MAZ,NFIL3,RIPK2,SLC9A2	10
Inflammatory Response,Organismal Injury and Abnormalities	inflammation	Inflammation of organ	0.00802	0.0541		0.539	0.639	ADAMTS6,CA4,CYLD,GADD45B,GSTM1,INSR,MAZ,NFIL3,RIPK2,SELENOK,SLC9A2	11
Endocrine System Disorders,Organismal Injury and Abnormalities	hormonal imbalance	Hormonal imbalance	0.00808	0.0541				INSR,SPRY4	2
Cellular Development,Embryonic Development,Organismal Development,Tissue Development	differentiation	Differentiation of trophoblast	0.00808	0.0541				CITED2,ETS2	2
Cell Death and Survival	activation-induced cell death	Activation-induced cell death of T lymphocytes	0.00808	0.0541				GADD45B,GPAM	2
Developmental Disorder,Neurological Disease	neural tube defect	Neural tube defect	0.00824	0.055				CITED2,PDGFC,RAPGEF2	3
Cancer,Gastrointestinal Disease,Organismal Injury and Abnormalities,Respiratory Disease	nasopharyngeal carcinoma	Nasopharyngeal carcinoma	0.00878	0.0557				CYLD,FOXN2,JCAD,ZNF436	4
Cellular Development,Tissue Development	differentiation	Differentiation of epithelial tissue	0.00886	0.0557		-0.283	-0.402	AFDN,CYLD,INSR,MYOD1,TMEM100	5
Embryonic Development,Organismal Development,Tissue Development	development	Development of ectoderm	0.00889	0.0557				AFDN,ETS2	2
Cancer,Hematological Disease,Immunological Disease,Organismal Injury and Abnormalities	Langerhans cell histiocytosis	Langerhans cell histiocytosis	0.00889	0.0557				INSR,PDGFC	2
Digestive System Development and Function	formation	Formation of secondary palate	0.00889	0.0557				KCNJ2,PDGFC	2
Developmental Disorder	midline defect	Midline defect	0.00895	0.0557				CITED2,KCNJ2,PDGFC,RAPGEF2	4
Cancer,Cellular Compromise,Cellular Function and Maintenance,Organismal Injury and Abnormalities	endoplasmic reticulum stress response	Endoplasmic reticulum stress response of cancer cells	0.00912	0.0557				TMBIM6	1
Cell Cycle	mitosis	Exit from mitosis of cervical cancer cell lines	0.00912	0.0557				CYLD	1
Amino Acid Metabolism,Lipid Metabolism,Molecular Transport,Small Molecule Biochemistry	uptake	Uptake of 2-aminoisobutyric acid	0.00912	0.0557				INSR	1
Endocrine System Disorders,Hereditary Disorder,Metabolic Disease,Organismal Injury and Abnormalities	insulin resistance type A	Insulin resistance type A	0.00912	0.0557				INSR	1
Cellular Development,Cellular Growth and Proliferation,Embryonic Development,Hematopoiesis,Lymphoid Tissue Structure and Development,Organ Development,Organismal Development,Tissue Development	development	Development of type 3 innate lymphoid cells	0.00912	0.0557				NFIL3	1
Cancer,Cellular Development,Organismal Injury and Abnormalities	immortalization	Immortalization of hepatocytes	0.00912	0.0557				CITED2	1
Cell Death and Survival,Cellular Compromise,Neurological Disease,Tissue Morphology	degeneration	Degeneration of motor axons	0.00912	0.0557				NFIL3	1
Cellular Movement	mobility	Mobility of fibrosarcoma cell lines	0.00912	0.0557				TMBIM6	1
Organ Morphology,Reproductive System Development and Function,Tissue Development	opening	Delay in opening of vagina	0.00912	0.0557				INSR	1
Connective Tissue Development and Function,Tissue Development	accumulation	Accumulation of visceral fat	0.00912	0.0557				RIPK2	1
Cardiovascular Disease,Cardiovascular System Development and Function,Organismal Injury and Abnormalities,Tissue Morphology	abnormal morphology	Abnormal morphology of inferior vena cava	0.00912	0.0557				CITED2	1
Cell Cycle,Gene Expression	binding	Binding of MEF2-binding element	0.00912	0.0557				MYOD1	1
Organ Morphology,Tissue Development,Tissue Morphology	regeneration	Regeneration of skeletal muscle tissue	0.00912	0.0557				MYOD1	1
Cardiovascular Disease,Developmental Disorder,Organismal Injury and Abnormalities	mesocardia	Mesocardia	0.00912	0.0557				CITED2	1
Cell Death and Survival,Dermatological Diseases and Conditions,Organismal Injury and Abnormalities	necroptosis	Necroptosis of keratinocytes	0.00912	0.0557				CYLD	1
Lipid Metabolism,Small Molecule Biochemistry	metabolism	Metabolism of oleic acid	0.00912	0.0557				DBP	1
Neurological Disease,Organismal Injury and Abnormalities,Psychological Disorders	amyotrophic lateral sclerosis	Onset of amyotrophic lateral sclerosis	0.00912	0.0557				NFIL3	1
Cardiovascular Disease,Organismal Injury and Abnormalities	cardiovascular disorder	Cardiovascular disorder of cardiac valve	0.00917	0.0557				CA4,CITED2	2
Cardiovascular Disease,Organismal Injury and Abnormalities	valvular regurgitation	Valvular regurgitation	0.00917	0.0557				CA4,CITED2	2
Cancer,Organismal Injury and Abnormalities	development	Development of squamous-cell carcinoma	0.00945	0.0572				CYLD,GSTM1	2
Cardiovascular System Development and Function,Embryonic Development,Organ Development,Organismal Development,Tissue Development	cardiogenesis	Cardiogenesis	0.00979	0.059				ADAMTS6,CITED2,INSR,KCNJ8,PDGFC,RAPGEF2	6
Endocrine System Disorders,Metabolic Disease,Organismal Injury and Abnormalities	metabolic syndrome X	Metabolic syndrome X	0.00981	0.059				CA4,ETS2,INSR	3
Cancer,Organismal Injury and Abnormalities	abdominal adenocarcinoma	Abdominal adenocarcinoma	0.00996	0.0597				ADAMTS4,ADAMTS6,ANO6,BAZ2B,CBFA2T3,CITED2,CREBRF,CYLD,CYYR1,DAGLA,DNAJB5,DUSP7,DYNC1LI2,ETS2,FOXN2,GPAM,GSE1,GSTM1,INSR,JCAD,KCNJ2,KCNJ8,LRRC30,MAZ,MBD4,MPP3,MYOD1,NFIL3,OSBPL6,PDGFC,PPP2R5A,RAPGEF2,RIPK2,SAMD4A,SELENOK,SLC9A2,SLC9A3R2,SOX13,SPRY4,TCP1,TMBIM6,ZNF436	42
Developmental Disorder,Tissue Morphology	abnormal morphology	Abnormal morphology of allantois	0.01	0.0598				AFDN,RAPGEF2	2
Cancer,Organismal Injury and Abnormalities	development	Development of carcinoma	0.0102	0.0609				ADAMTS4,BAZ2B,CBFA2T3,CREBRF,CYLD,CYYR1,DAGLA,DNAJB5,ETS2,FOXN2,GADD45B,GSE1,GSTM1,INSR,JCAD,LRRC30,MAZ,MBD4,MPP3,MYOD1,NFIL3,OSBPL6,PDGFC,PPP2R5A,RAPGEF2,RIPK2,SAMD4A,SELENOK,SLC9A2,SLC9A3R2,SOX13,SPRY4,TCP1,ZNF436	34
Endocrine System Development and Function	glucose tolerance	Glucose tolerance	0.0103	0.061				GPAM,INSR,SAMD4A,TMBIM6	4
Nutritional Disease	obesity	Obesity	0.0104	0.0615				CA4,CREBRF,INSR,RIPK2,SAMD4A,TMBIM6	6
Cancer,Organismal Injury and Abnormalities	cancer of head	Cancer of head	0.0105	0.0615				ADAMTS4,ADAMTS6,BAZ2B,CITED2,DNAJB5,INSR,JCAD,PPP2R5A,SAMD4A,TCP1	10
Organismal Survival	organismal death	Organismal death	0.0105	0.0615		-1.203	-0.691	ADAMTS4,AFDN,CA4,CITED2,CYLD,ETS2,GSE1,GSTM1,INSR,KCNJ2,KCNJ8,MYOD1,NFIL3,PDGFC,RAPGEF2,SPRY4	16
Cellular Assembly and Organization,Cellular Function and Maintenance	organization	Microtubule dynamics	0.0105	0.0615		0.509	0.329	ADAMTS4,AFDN,CYLD,DYNC1LI2,DYNLL1,GSTM1,INSR,KCNJ2,RAPGEF2,SLC9A3R2	10
Amino Acid Metabolism,Post-Translational Modification,Small Molecule Biochemistry	phosphorylation	Phosphorylation of L-tyrosine	0.0107	0.0616				INSR,PDGFC,RIPK2	3
Cellular Development,Cellular Growth and Proliferation,Hematological System Development and Function,Hematopoiesis,Lymphoid Tissue Structure and Development,Tissue Development	differentiation	Differentiation of myeloid leukocytes	0.0109	0.0616				CBFA2T3,CITED2,ETS2,MYOD1	4
Cell-To-Cell Signaling and Interaction,Hepatic System Development and Function	activation	Activation of liver cells	0.0109	0.0616				CYLD,PDGFC	2
Neurological Disease,Organismal Injury and Abnormalities	lethal encephalopathy	Lethal encephalopathy	0.0114	0.0616				DBP	1
Cardiovascular Disease,Organismal Injury and Abnormalities,Skeletal and Muscular Disorders	idiopathic ventricular fibrillation	Idiopathic ventricular fibrillation	0.0114	0.0616				KCNJ8	1
Cellular Growth and Proliferation,Skeletal and Muscular System Development and Function	cytostasis	Cytostasis of muscle cells	0.0114	0.0616				MYOD1	1
Cancer,Neurological Disease,Organismal Injury and Abnormalities	ependymoma	Ependymoma in posterior cranial fossa	0.0114	0.0616				SOX13	1
Cardiovascular Disease,Organismal Injury and Abnormalities	stenosis	Stenosis of pulmonary artery	0.0114	0.0616				CITED2	1
Digestive System Development and Function,Organ Morphology,Organismal Development	size	Size of exocrine region of pancreas	0.0114	0.0616				INSR	1
Organ Morphology,Organismal Injury and Abnormalities,Skeletal and Muscular Disorders,Skeletal and Muscular System Development and Function	lack	Lack of skeletal muscle	0.0114	0.0616				MYOD1	1
Lipid Metabolism,Small Molecule Biochemistry	scrambling	Scrambling of phospholipid	0.0114	0.0616				ANO6	1
Developmental Disorder,Embryonic Development,Organismal Development,Tissue Morphology	abnormal morphology	Abnormal morphology of central canal	0.0114	0.0616				CITED2	1
Carbohydrate Metabolism,Energy Production	accumulation	Accumulation of pyruvic acid	0.0114	0.0616				TMBIM6	1
Cardiovascular Disease,Cardiovascular System Development and Function,Organismal Injury and Abnormalities,Tissue Morphology	abnormal morphology	Abnormal morphology of pulmonary trunk	0.0114	0.0616				CITED2	1
Lipid Metabolism,Small Molecule Biochemistry	metabolism	Metabolism of palmitic acid	0.0114	0.0616				DBP	1
Lipid Metabolism,Small Molecule Biochemistry,Vitamin and Mineral Metabolism	steroidogenesis	Steroidogenesis of testicular cancer cell lines	0.0114	0.0616				SLC9A3R2	1
Embryonic Development,Organismal Development,Tissue Development	development	Development of trophoectoderm	0.0114	0.0616				ETS2	1
Cell Death and Survival,Hematological System Development and Function	survival	Survival of natural killer T lymphocytes	0.0114	0.0616				CYLD	1
Cellular Development,Cellular Growth and Proliferation,Hematological System Development and Function,Hematopoiesis,Lymphoid Tissue Structure and Development,Tissue Development	development	Development of plasmacytoid precursor dendritic cells	0.0114	0.0616				CBFA2T3	1
Cardiovascular Disease,Inflammatory Response,Organismal Injury and Abnormalities	inflammation	Inflammation of vascular tissue	0.0114	0.0616				INSR	1
Digestive System Development and Function,Gastrointestinal Disease,Hematological System Development and Function,Lymphoid Tissue Structure and Development,Organ Morphology,Organismal Development,Organismal Injury and Abnormalities,Tissue Morphology	abnormal morphology	Abnormal morphology of enlarged Peyer's patches	0.0114	0.0616				CYLD	1
Lipid Metabolism,Small Molecule Biochemistry	catabolism	Catabolism of diacylglycerol	0.0114	0.0616				DAGLA	1
Organ Development,Organ Morphology,Skeletal and Muscular System Development and Function	relaxation	Relaxation of skeletal muscle	0.0114	0.0616				KCNJ2	1
Cellular Function and Maintenance	homeostasis	Cellular homeostasis	0.0114	0.0616		-1.604	-1.737	AFDN,CYLD,DYNLL1,ETS2,GADD45B,INSR,KCNJ2,NFIL3,RAPGEF2,RIPK2,SLC9A2,TMBIM6	12
Hematological System Development and Function,Lymphoid Tissue Structure and Development,Tissue Morphology	quantity	Quantity of lymphocytes	0.0115	0.0617		-0.516	-0.666	CBFA2T3,CYLD,ETS2,GADD45B,NFIL3,RIPK2,SOX13	7
Cell Morphology,Hematological Disease,Hematological System Development and Function,Hematopoiesis,Lymphoid Tissue Structure and Development,Tissue Morphology	abnormal morphology	Abnormal morphology of bone marrow cells	0.0115	0.0617				ANO6,CBFA2T3	2
Cancer,Organismal Injury and Abnormalities	development	Development of melanoma	0.0115	0.0617				GSTM1,RAPGEF2	2
Endocrine System Disorders,Gastrointestinal Disease,Metabolic Disease,Organismal Injury and Abnormalities	non-insulin-dependent diabetes mellitus	Non-insulin-dependent diabetes mellitus	0.0116	0.062				CA4,CREBRF,INSR,KCNJ8,SAMD4A	5
Respiratory Disease,Respiratory System Development and Function	abnormal morphology	Abnormal morphology of respiratory system	0.0119	0.0631				CITED2,CYLD,PDGFC,SPRY4	4
Cardiovascular Disease,Cardiovascular System Development and Function,Organ Morphology,Organismal Development,Organismal Injury and Abnormalities	abnormal morphology	Abnormal morphology of heart	0.0121	0.064				AFDN,CITED2,INSR,KCNJ8,MYOD1,PDGFC,PPP2R5A	7
Cell-To-Cell Signaling and Interaction,Cellular Assembly and Organization	quantity	Quantity of actin stress fibers	0.0122	0.064				INSR,SLC9A3R2	2
Carbohydrate Metabolism	glycolysis	Glycolysis of cells	0.0122	0.064				CBFA2T3,CITED2,INSR	3
Cellular Function and Maintenance,Hematological System Development and Function	function	Function of lymphocytes	0.0124	0.0647				GADD45B,NFIL3,RIPK2,SELENOK	4
Cell Morphology	sprouting	Sprouting	0.0124	0.0647		-1	-1.127	ADAMTS4,AFDN,CYLD,RAPGEF2,SPRY4	5
Organismal Development,Organismal Injury and Abnormalities	abnormal morphology	Abnormal morphology of thoracic cavity	0.0125	0.0647				AFDN,CITED2,CYLD,INSR,KCNJ8,MYOD1,PDGFC,PPP2R5A	8
Connective Tissue Disorders,Organismal Injury and Abnormalities,Skeletal and Muscular Disorders	Dupuytren contracture	Dupuytren contracture	0.0128	0.0647				ADAMTS4,ADAMTS6	2
Cell Signaling	calcium-mediated signaling	Calcium-mediated signaling	0.0128	0.0647				SELENOK,TMEM100	2
Cell Cycle	G2/M phase transition	G2/M phase transition	0.013	0.0647				DYNLL1,GADD45B,MBD4	3
Cancer,Gastrointestinal Disease,Organismal Injury and Abnormalities	oral tumor	Oral tumor	0.0133	0.0647				ADAMTS6,BAZ2B,CITED2,DNAJB5,GSTM1,JCAD,PPP2R5A,SAMD4A,TCP1	9
Organismal Development	morphology	Morphology of body cavity	0.0134	0.0647				AFDN,CBFA2T3,CITED2,CYLD,ETS2,INSR,KCNJ8,MYOD1,NFIL3,PDGFC,PPP2R5A,SLC9A2	12
Cardiovascular Disease,Organismal Injury and Abnormalities	cardiac death	Cardiac death	0.0135	0.0647				CA4,INSR	2
Cancer,Organismal Injury and Abnormalities,Respiratory Disease,Tumor Morphology	ALK rearrangement positive large cell lung carcinoma	Progressive ALK rearrangement positive large cell lung carcinoma	0.0136	0.0647				INSR	1
Cancer,Organismal Injury and Abnormalities	ALK mutation positive malignant tumor	Unresectable ALK mutation positive malignant tumor	0.0136	0.0647				INSR	1
Cell Death and Survival,Skeletal and Muscular System Development and Function	survival	Survival of myoblasts	0.0136	0.0647				MYOD1	1
Tissue Morphology	remodeling	Remodeling of extracellular matrix	0.0136	0.0647				ADAMTS4	1
Cell-To-Cell Signaling and Interaction,Nervous System Development and Function	activation	Activation of satellite cells	0.0136	0.0647				MYOD1	1
Endocrine System Disorders,Hematological Disease,Metabolic Disease,Organismal Injury and Abnormalities	postprandial hyperglycemia	Postprandial hyperglycemia	0.0136	0.0647				INSR	1
Hematological Disease,Immunological Disease	exhaustion	Exhaustion of CD8+ T lymphocyte	0.0136	0.0647				ANO6	1
Cancer,Organismal Injury and Abnormalities,Respiratory Disease,Tumor Morphology	ALK rearrangement positive lung squamous cell carcinoma	Progressive ALK rearrangement positive lung squamous cell carcinoma	0.0136	0.0647				INSR	1
Small Molecule Biochemistry	metabolism	Metabolism of nitrobenzene	0.0136	0.0647				GSTM1	1
Cell-To-Cell Signaling and Interaction,Cellular Assembly and Organization,Reproductive System Development and Function	cell-cell adhesion	Cell-cell adhesion of breast cell lines	0.0136	0.0647				AFDN	1
Cardiovascular Disease,Organismal Injury and Abnormalities	vasospasm	Vasospasm of coronary artery	0.0136	0.0647				KCNJ8	1
Organ Development,Reproductive System Development and Function	function	Function of placenta	0.0136	0.0647				ETS2	1
Carbohydrate Metabolism	incorporation	Incorporation of glycogen	0.0136	0.0647				INSR	1
Carbohydrate Metabolism,Lipid Metabolism,Molecular Transport,Small Molecule Biochemistry	quantity	Quantity of phosphtidylinositol 5-phosphate	0.0136	0.0647				INSR	1
Cell Morphology,Cell-To-Cell Signaling and Interaction	morphology	Morphology of adherens junctions	0.0136	0.0647				AFDN	1
Developmental Disorder,Hereditary Disorder,Metabolic Disease,Neurological Disease,Organismal Injury and Abnormalities,Skeletal and Muscular Disorders	hypokalemic periodic paralysis	Hypokalemic periodic paralysis	0.0136	0.0647				CA4	1
Cancer,Inflammatory Response,Organismal Injury and Abnormalities	inflammatory myofibroblastic tumor with ALK translocation	Inflammatory myofibroblastic tumor with ALK translocation	0.0136	0.0647				INSR	1
Embryonic Development,Organ Development,Organismal Development,Renal and Urological System Development and Function,Tissue Development	morphogenesis	Morphogenesis of metanephros	0.0136	0.0647				INSR	1
Developmental Disorder,Hematological Disease,Hereditary Disorder,Metabolic Disease,Neurological Disease,Organismal Injury and Abnormalities,Skeletal and Muscular Disorders	hyperkalemic periodic paralysis	Hyperkalemic periodic paralysis	0.0136	0.0647				CA4	1
Cancer,Organismal Injury and Abnormalities,Respiratory Disease,Tumor Morphology	progressive ALK fusion positive non-squamous non-small cell lung cancer	Metastatic progressive ALK fusion positive non-squamous non-small cell lung cancer	0.0136	0.0647				INSR	1
Gastrointestinal Disease,Organismal Injury and Abnormalities	hypochlorhydria	Hypochlorhydria	0.0136	0.0647				SLC9A2	1
Cellular Assembly and Organization	uncoupling	Uncoupling of mitochondria	0.0136	0.0647				INSR	1
Organismal Injury and Abnormalities	pH regulation	Abnormal pH regulation	0.0136	0.0647				CA4	1
Developmental Disorder,Hereditary Disorder,Organismal Injury and Abnormalities,Skeletal and Muscular Disorders	paramyotonia congenita	Paramyotonia congenita	0.0136	0.0647				CA4	1
Cancer,Dermatological Diseases and Conditions,Organismal Injury and Abnormalities	skin appendage carcinoma	Skin appendage carcinoma	0.0136	0.0647				CYLD	1
Cell Death and Survival,Cellular Function and Maintenance	colony survival	Colony survival of melanoma cell lines	0.0136	0.0647				GSTM1	1
Developmental Disorder,Organismal Injury and Abnormalities,Reproductive System Disease	primary sex reversal	Primary sex reversal	0.0136	0.0647				INSR	1
Cancer,Organismal Injury and Abnormalities	malignant solid organ tumor	Malignant solid organ tumor	0.0139	0.0653				ADAMTS4,ADAMTS6,ANO6,BAZ2B,CA4,CBFA2T3,CREBRF,CYLD,CYYR1,DAGLA,DNAJB5,DYNC1LI2,FOXN2,GSE1,GSTM1,INSR,JCAD,KCNJ2,KCNJ8,LRRC30,MBD4,MPP3,MYOD1,OSBPL6,PDGFC,RAPGEF2,SLC9A2,SOX13,SPRY4,TMEM100,ZNF436	31
Gastrointestinal Disease,Inflammatory Disease	gastroenteritis	Gastroenteritis	0.0139	0.0653		0.805	0.942	CYLD,MAZ,NFIL3,RIPK2,SLC9A2	5
Organismal Development	abnormal morphology	Abnormal morphology of body cavity	0.0141	0.066				AFDN,CBFA2T3,CITED2,CYLD,INSR,KCNJ8,MYOD1,NFIL3,PDGFC,PPP2R5A,SLC9A2	11
Cellular Development,Cellular Growth and Proliferation,Skeletal and Muscular System Development and Function	proliferation	Proliferation of muscle cell lines	0.0141	0.066				INSR,RIPK2	2
Cell-To-Cell Signaling and Interaction,Embryonic Development	response	Response of embryonic cell lines	0.0141	0.066				CYLD,SPRY4	2
Gene Expression	expression	Expression of RNA	0.0144	0.0669		0.001	-0.118	AFDN,CBFA2T3,CITED2,CREBRF,DBP,DNAJB5,ETS2,INSR,MAZ,MBD4,MYOD1,NFIL3,PPP2R5A,RIPK2,SAMD4A	15
Cellular Development,Cellular Growth and Proliferation,Hair and Skin Development and Function	development	Development of epithelial cell lines	0.0145	0.0669				CBFA2T3,INSR	2
Gastrointestinal Disease,Organismal Injury and Abnormalities	abnormality	Abnormality of ileum	0.0145	0.0669				CYLD,RIPK2	2
Cancer,Dermatological Diseases and Conditions,Organismal Injury and Abnormalities	development	Development of skin tumor	0.0145	0.0669				CYLD,GSTM1	2
Cell Cycle	interphase	Interphase	0.0147	0.0678				CYLD,DYNLL1,GADD45B,INSR,MBD4,MYOD1,TCP1	7
Developmental Disorder,DNA Replication, Recombination, and Repair,Hereditary Disorder,Organismal Injury and Abnormalities	Down syndrome	Down syndrome	0.0148	0.0679				ETS2,GSTM1	2
Hematological System Development and Function,Lymphoid Tissue Structure and Development,Tissue Morphology	quantity	Quantity of memory T lymphocytes	0.0148	0.0679				GADD45B,NFIL3	2
Molecular Transport	transport	Transport of metal ion	0.015	0.0685				KCNJ2,KCNJ8,SELENOK,SLC9A2	4
Cell Death and Survival,Neurological Disease,Organismal Injury and Abnormalities	cell death	Cell death of cortical neurons	0.0152	0.069				ETS2,NFIL3,TCP1	3
Endocrine System Disorders,Gastrointestinal Disease,Metabolic Disease,Organismal Injury and Abnormalities	hyperinsulinism	Hyperinsulinism	0.0152	0.069				GPAM,INSR	2
Neurological Disease	sensory disorders	Sensory disorders	0.0155	0.0692				CA4,KCNJ2,SPRY4	3
Cell Morphology,Digestive System Development and Function,Endocrine System Disorders,Gastrointestinal Disease,Organ Morphology,Organismal Development,Organismal Injury and Abnormalities	lack	Lack of beta islet cells	0.0159	0.0692				INSR	1
Developmental Disorder,Endocrine System Disorders,Organ Morphology,Organismal Development,Organismal Injury and Abnormalities	agenesis	Agenesis of adrenal gland	0.0159	0.0692				CITED2	1
Cell Morphology,Cellular Development,Connective Tissue Development and Function	conversion	Conversion of fibroblast cell lines	0.0159	0.0692				MYOD1	1
Cancer,Organismal Injury and Abnormalities,Respiratory Disease	ALK fusion positive non-small cell lung cancer	Relapsed ALK fusion positive non-small cell lung cancer	0.0159	0.0692				INSR	1
Digestive System Development and Function,Hepatic System Development and Function,Organ Morphology,Organismal Development,Tissue Morphology	morphology	Morphology of liver tissue	0.0159	0.0692				INSR	1
Cardiovascular System Development and Function,Organ Development	total end-diastolic diameter	Total end-diastolic diameter of left ventricle	0.0159	0.0692				INSR	1
Cardiovascular System Development and Function,Organ Morphology,Organismal Development,Tissue Morphology	vasodilation	Vasodilation of heart	0.0159	0.0692				KCNJ8	1
Small Molecule Biochemistry	toxicity	Toxicity of methotrexate	0.0159	0.0692				GSTM1	1
Cell Morphology	polarization	Polarization of vascular endothelial cells	0.0159	0.0692				CYLD	1
Connective Tissue Development and Function,Skeletal and Muscular System Development and Function	resorption	Resorption of osteoclastic bone	0.0159	0.0692				DYNLL1	1
Connective Tissue Development and Function,Embryonic Development,Organ Development,Organismal Development,Skeletal and Muscular System Development and Function,Tissue Development	development	Development of neural arch	0.0159	0.0692				PDGFC	1
Embryonic Development,Tissue Morphology	quantity	Quantity of somites	0.0159	0.0692				AFDN	1
Lipid Metabolism,Molecular Transport,Small Molecule Biochemistry	transport	Transport of cholesterol ester	0.0159	0.0692				SLC9A3R2	1
Cellular Development,Cellular Growth and Proliferation,Hematological System Development and Function,Hematopoiesis,Lymphoid Tissue Structure and Development,Tissue Development	generation	Generation of conventional dendritic cells	0.0159	0.0692				NFIL3	1
Endocrine System Development and Function,Lipid Metabolism,Small Molecule Biochemistry	synthesis	Synthesis of 2-arachidonoylglycerol	0.0159	0.0692				DAGLA	1
Post-Translational Modification	conversion	Conversion of protein	0.0159	0.0692				TCP1	1
Cancer,Organismal Injury and Abnormalities,Reproductive System Disease	breast or ovarian cancer	Breast or ovarian cancer	0.016	0.0694				ADAMTS4,ADAMTS6,CREBRF,CYLD,ETS2,FOXN2,GADD45B,GPAM,GSTM1,INSR,MAZ,MBD4,NFIL3,OSBPL6,PPP2R1B,SAMD4A,SOX13,TCP1,ZNF436	19
Developmental Disorder	turning	Abnormal turning of embryo	0.0166	0.0718				CITED2,RAPGEF2	2
Cellular Function and Maintenance	function	Function of leukocytes	0.0167	0.0719				CYLD,GADD45B,NFIL3,RIPK2,SELENOK	5
Organismal Injury and Abnormalities	visceromegaly	Visceromegaly	0.0167	0.0721				CBFA2T3,CYLD,INSR,KCNJ8,MYOD1,PDGFC,PPP2R5A	7
Infectious Diseases	infection	Infection of mammalia	0.0169	0.0724		1	1.184	CYLD,GSTM1,RIPK2,SELENOK	4
Cell Cycle,Cell Morphology	formation	Formation of mitotic spindle	0.017	0.0726				DYNC1LI2,Stard9	2
Cell Cycle	G2 phase	Arrest in G2 phase	0.017	0.0726				GADD45B,MBD4,TCP1	3
Cancer,Organismal Injury and Abnormalities	extracranial solid tumor	Extracranial solid tumor	0.0171	0.0728		0.186	0.195	ADAMTS4,ADAMTS6,ANO6,BAZ2B,CA4,CBFA2T3,CITED2,CREBRF,CYLD,CYYR1,DAGLA,DBP,DNAJB5,DUSP7,DYNC1LI2,DYNLL1,ETS2,FOXN2,GADD45B,GPAM,GSE1,GSTM1,INSR,JCAD,KCNJ2,KCNJ8,LRRC30,MAZ,MBD4,MPP3,MYOD1,NFIL3,OSBPL6,PDGFC,PPP2R1B,PPP2R5A,RAPGEF2,RIPK2,SAMD4A,SELENOK,SLC9A2,SLC9A3R2,SOX13,SPRY4,TCP1,TMBIM6,TMEM100,ZNF436	48
Cardiovascular Disease,Cardiovascular System Development and Function,Organ Morphology,Organismal Development,Organismal Injury and Abnormalities,Skeletal and Muscular Disorders	dilated cardiomyopathy	Dilated cardiomyopathy	0.0171	0.0728				INSR,KCNJ8,PDGFC,PPP2R5A	4
Cellular Development,Skeletal and Muscular System Development and Function,Tissue Development	differentiation	Differentiation of muscle cells	0.0172	0.073				CITED2,FOXN2,MYOD1,RIPK2	4
Cellular Development,Cellular Growth and Proliferation	cell proliferation	Cell proliferation of melanoma cell lines	0.0174	0.073				ADAMTS4,GSTM1,RAPGEF2	3
Developmental Disorder,Tissue Morphology	abnormal morphology	Abnormal morphology of extraembryonic tissue	0.0177	0.073				AFDN,ETS2,RAPGEF2	3
Cell Death and Survival	apoptosis	Apoptosis of fibroblast cell lines	0.018	0.073				CA4,CYLD,INSR,PPP2R1B	4
Cell-To-Cell Signaling and Interaction,Nervous System Development and Function	binding	Binding of neurons	0.0181	0.073				AFDN,INSR	2
Cell Morphology,Humoral Immune Response,Immunological Disease,Lymphoid Tissue Structure and Development	abnormal morphology	Abnormal morphology of B lymphocytes	0.0181	0.073				CYLD,NFIL3	2
Infectious Diseases,Inflammatory Disease,Inflammatory Response,Organismal Injury and Abnormalities	experimentally induced bacterial peritonitis	Experimentally induced bacterial peritonitis	0.0182	0.073				RIPK2	1
Cardiovascular System Development and Function,Tissue Development,Tissue Morphology	regeneration	Regeneration of endothelial tissue	0.0182	0.073				INSR	1
Developmental Disorder,Organismal Development,Tissue Morphology	abnormal morphology	Abnormal morphology of amniotic cavity	0.0182	0.073				AFDN	1
Cell Cycle,Hepatic System Development and Function	mitogenesis	Mitogenesis of hepatocytes	0.0182	0.073				INSR	1
Cancer,Organismal Injury and Abnormalities,Reproductive System Disease	early-onset breast cancer	Early-onset breast cancer	0.0182	0.073				PPP2R1B	1
Lipid Metabolism,Molecular Transport,Small Molecule Biochemistry	accumulation	Accumulation of diacylglycerol	0.0182	0.073				GPAM	1
Nervous System Development and Function	fusion	Fusion of dorsal root ganglion	0.0182	0.073				CITED2	1
Cell Morphology,Hematological System Development and Function,Hematopoiesis,Tissue Morphology	lack	Lack of red blood cells	0.0182	0.073				RAPGEF2	1
Carbohydrate Metabolism,Lipid Metabolism,Small Molecule Biochemistry	incorporation	Incorporation of phosphatidylcholine	0.0182	0.073				GPAM	1
Cell Cycle,Connective Tissue Development and Function	cell cycle progression	Re-entry into cell cycle progression of fibroblast cell lines	0.0182	0.073				MYOD1	1
Organismal Injury and Abnormalities,Respiratory Disease	right pulmonary isomerism	Right pulmonary isomerism	0.0182	0.073				CITED2	1
Cancer,Gastrointestinal Disease,Organismal Injury and Abnormalities	sporadic colorectal cancer	Sporadic colorectal cancer	0.0182	0.073				INSR	1
Nutritional Disease	failure to thrive	Failure to thrive	0.0182	0.073				INSR	1
Cell Death and Survival,Nervous System Development and Function	cell viability	Cell viability of Schwann cells	0.0182	0.073				RIPK2	1
Cell-mediated Immune Response,Cellular Development,Cellular Function and Maintenance,Cellular Growth and Proliferation,Embryonic Development,Hematological System Development and Function,Hematopoiesis,Lymphoid Tissue Structure and Development,Organ Development,Organismal Development,Tissue Development	production	Production of natural killer precursor cells	0.0182	0.073				NFIL3	1
Developmental Disorder,Ophthalmic Disease,Organismal Injury and Abnormalities	iris coloboma	Iris coloboma	0.0182	0.073				CITED2	1
Cell Cycle,Skeletal and Muscular System Development and Function	cell cycle progression	Arrest in cell cycle progression of muscle cell lines	0.0182	0.073				MYOD1	1
DNA Replication, Recombination, and Repair	chromosomal aberration	Chromosomal aberration	0.0183	0.0736				DYNLL1,ETS2,GSTM1	3
Gastrointestinal Disease,Organismal Injury and Abnormalities	colorectal disorder	Colorectal disorder	0.0186	0.0746		0.125	0.227	ADAMTS4,BAZ2B,CBFA2T3,CYLD,CYYR1,GSE1,GSTM1,INSR,JCAD,KCNJ2,KCNJ8,LRRC30,MAZ,MBD4,MPP3,MYOD1,NFIL3,OSBPL6,PPP2R1B,PPP2R5A,RAPGEF2,RIPK2,SAMD4A,SLC9A3R2,SPRY4,TCP1	26
Cancer,Gastrointestinal Disease,Organismal Injury and Abnormalities	colorectal cancer	Colorectal cancer	0.0198	0.078				ADAMTS4,BAZ2B,CBFA2T3,CYLD,CYYR1,GSE1,GSTM1,INSR,JCAD,KCNJ2,KCNJ8,LRRC30,MAZ,MBD4,MPP3,MYOD1,OSBPL6,PPP2R1B,PPP2R5A,RAPGEF2,RIPK2,SAMD4A,SLC9A3R2,SPRY4,TCP1	25
Cardiovascular Disease,Hereditary Disorder,Organismal Injury and Abnormalities	familial cardiovascular disease	Familial cardiovascular disease	0.0199	0.078				CA4,CITED2,ETS2,KCNJ2,KCNJ8	5
Hereditary Disorder,Organismal Injury and Abnormalities,Skeletal and Muscular Disorders	autosomal dominant myopathy	Autosomal dominant myopathy	0.0204	0.078				CA4,KCNJ2,KCNJ8	3
Cell Death and Survival	apoptosis	Apoptosis of dopaminergic neurons	0.0204	0.078				PDGFC	1
Cancer,Organismal Injury and Abnormalities,Respiratory Disease	ALK rearrangement positive large cell lung carcinoma	Metastatic ALK rearrangement positive large cell lung carcinoma	0.0204	0.078				INSR	1
Digestive System Development and Function,Organ Morphology,Organismal Development	length	Length of colon	0.0204	0.078				NFIL3	1
Cell Morphology,Hematological System Development and Function,Inflammatory Response,Organismal Development	morphology	Morphology of peritoneal macrophages	0.0204	0.078				ETS2	1
Cancer,Organismal Injury and Abnormalities,Respiratory Disease	ALK rearrangement positive large cell lung carcinoma	Advanced ALK rearrangement positive large cell lung carcinoma	0.0204	0.078				INSR	1
Organ Morphology,Organismal Injury and Abnormalities,Renal and Urological Disease	atrophy	Atrophy of renal medulla	0.0204	0.078				ADAMTS4	1
Cell Death and Survival	apoptosis	Apoptosis of double-positive thymocyte	0.0204	0.078				CYLD	1
Lipid Metabolism,Small Molecule Biochemistry	metabolism	Metabolism of linoleic acid	0.0204	0.078				DBP	1
Organ Morphology,Organismal Development,Organismal Injury and Abnormalities,Respiratory Disease,Respiratory System Development and Function	abnormal morphology	Abnormal morphology of nasal septum	0.0204	0.078				PDGFC	1
Cell Morphology,Hematological Disease,Hematological System Development and Function,Hematopoiesis,Lymphoid Tissue Structure and Development,Tissue Morphology	abnormal morphology	Abnormal morphology of megakaryocyte/erythrocyte lineage-restricted progenitor cells	0.0204	0.078				CBFA2T3	1
Cell Cycle,Connective Tissue Development and Function	G2/M phase transition	Arrest in G2/M phase transition of fibroblasts	0.0204	0.078				MBD4	1
Cell Morphology,Embryonic Development,Organ Development,Organ Morphology,Organismal Development,Organismal Injury and Abnormalities,Respiratory Disease,Respiratory System Development and Function,Tissue Development,Tissue Morphology	abnormal morphology	Abnormal morphology of alveolar type I cells	0.0204	0.078				CITED2	1
Cancer,Organismal Injury and Abnormalities,Respiratory Disease	ALK rearrangement positive lung squamous cell carcinoma	Metastatic ALK rearrangement positive lung squamous cell carcinoma	0.0204	0.078				INSR	1
Metabolic Disease,Organismal Injury and Abnormalities,Renal and Urological Disease	ketoaciduria	Ketoaciduria	0.0204	0.078				INSR	1
Lipid Metabolism,Molecular Transport,Small Molecule Biochemistry	concentration	Concentration of stearic acid	0.0204	0.078				DAGLA	1
Cancer,Gastrointestinal Disease,Organismal Injury and Abnormalities	lip and oral cavity carcinoma	Lip and oral cavity carcinoma	0.0204	0.078				SAMD4A	1
Cardiovascular System Development and Function,Embryonic Development,Organ Development,Organismal Development,Tissue Development	formation	Formation of ventricular septum	0.0204	0.078				CITED2,PDGFC	2
Gastrointestinal Disease,Inflammatory Response	inflammation	Inflammation of gastrointestinal tract	0.0205	0.078		0.805	0.945	CYLD,MAZ,NFIL3,RIPK2,SLC9A2	5
Embryonic Development,Organismal Development	growth	Growth of embryo	0.0205	0.078				AFDN,CITED2,DAGLA,INSR,RAPGEF2	5
Cancer,Dermatological Diseases and Conditions,Organismal Injury and Abnormalities	skin cancer	Skin cancer	0.0207	0.0784				ADAMTS4,ADAMTS6,ANO6,BAZ2B,CA4,CBFA2T3,CREBRF,CYLD,CYYR1,DAGLA,DNAJB5,DYNC1LI2,FOXN2,GSE1,GSTM1,INSR,JCAD,KCNJ2,KCNJ8,LRRC30,MBD4,MPP3,OSBPL6,PDGFC,RAPGEF2,SLC9A2,SOX13,SPRY4,TMEM100,ZNF436	30
Cell Cycle	G2 phase	G2 phase	0.0207	0.0785				DYNLL1,GADD45B,MBD4,TCP1	4
Cancer,Organismal Injury and Abnormalities,Respiratory Disease	non-small cell lung cancer	Stage IIIB-IV non-small cell lung cancer	0.0208	0.0786				ETS2,INSR	2
Cardiovascular System Development and Function,Cellular Development,Cellular Function and Maintenance,Cellular Growth and Proliferation,Organismal Development,Tissue Development	proliferation	Proliferation of endothelial cells	0.0212	0.0797		-1.067	-1.148	KCNJ2,PDGFC,SLC9A3R2,SPRY4	4
Cardiovascular System Development and Function,Cellular Development,Tissue Development	differentiation	Differentiation of endothelial cells	0.0212	0.0797				MYOD1,TMEM100	2
Molecular Transport	transport	Transport of monovalent inorganic cation	0.0212	0.0797				KCNJ2,KCNJ8,SLC9A2	3
Cell-To-Cell Signaling and Interaction	activation	Activation of cells	0.0215	0.0805		-0.994	-1.159	ANO6,CYLD,INSR,KCNJ2,MYOD1,NFIL3,PDGFC,RIPK2	8
Humoral Immune Response	class switching	Class switching	0.0216	0.0808				CYLD,NFIL3	2
Embryonic Development,Organismal Development,Tissue Morphology	size	Size of embryo	0.0218	0.0811				AFDN,CITED2,ETS2,RAPGEF2	4
Organismal Development	size	Size of body	0.0222	0.0819		1.254	0.878	CA4,CYLD,GPAM,INSR,MYOD1,NFIL3,SPRY4	7
Carbohydrate Metabolism	synthesis	Synthesis of glycogen	0.0224	0.0819				GPAM,INSR	2
Cardiovascular Disease,Organismal Injury and Abnormalities	non-obstructive coronary artery disease	Non-obstructive coronary artery disease	0.0226	0.0819				KCNJ2	1
Developmental Disorder,Neurological Disease,Organismal Injury and Abnormalities	anencephaly	Anencephaly	0.0226	0.0819				RAPGEF2	1
Cellular Function and Maintenance,Small Molecule Biochemistry	homeostasis	Homeostasis of K+	0.0226	0.0819				KCNJ2	1
Organismal Injury and Abnormalities,Respiratory Disease	chronic obstructive pulmonary disease	Moderate chronic obstructive pulmonary disease	0.0226	0.0819				INSR	1
Cell-To-Cell Signaling and Interaction,Cellular Growth and Proliferation,Skeletal and Muscular System Development and Function	stimulation	Stimulation of smooth muscle cells	0.0226	0.0819				PDGFC	1
Endocrine System Development and Function,Lipid Metabolism,Small Molecule Biochemistry	conversion	Conversion of dihydrotestosterone	0.0226	0.0819				Akr1c14	1
Cell-To-Cell Signaling and Interaction,Nervous System Development and Function	binding	Binding of hippocampal neurons	0.0226	0.0819				INSR	1
Cell Death and Survival	necroptosis	Necroptosis of leukemia cell lines	0.0226	0.0819				CYLD	1
Embryonic Development,Organismal Development	primary sex determination	Primary sex determination	0.0226	0.0819				INSR	1
Cellular Compromise	stress response	Stress response of sarcoma cell lines	0.0226	0.0819				TMBIM6	1
Cell-To-Cell Signaling and Interaction,Cellular Growth and Proliferation,Nervous System Development and Function	excitation	Excitation of sensory neurons	0.0226	0.0819				KCNJ2	1
Cardiovascular System Development and Function,Organ Morphology,Organismal Development	morphology	Morphology of atrial septum	0.0226	0.0819				CITED2	1
Cellular Development,Cellular Growth and Proliferation	colony formation	Colony formation of tumor cell lines	0.0228	0.0824		0.811	0.794	GADD45B,GSE1,INSR,SPRY4	4
Cancer,Gastrointestinal Disease,Organismal Injury and Abnormalities	gastrointestinal carcinoma	Gastrointestinal carcinoma	0.0231	0.0833				ADAMTS4,ADAMTS6,ANO6,BAZ2B,CBFA2T3,CITED2,CREBRF,CYLD,CYYR1,DAGLA,DNAJB5,DYNC1LI2,FOXN2,GPAM,GSE1,GSTM1,INSR,JCAD,KCNJ2,KCNJ8,LRRC30,MAZ,MBD4,MPP3,MYOD1,OSBPL6,PDGFC,PPP2R5A,RAPGEF2,RIPK2,SAMD4A,SLC9A2,SLC9A3R2,SOX13,SPRY4,TCP1,TMBIM6,ZNF436	38
Cancer,Organismal Injury and Abnormalities,Respiratory Disease	respiratory system tumor	Respiratory system tumor	0.0232	0.0833				CYLD,DAGLA,ETS2,FOXN2,GADD45B,GSTM1,INSR,JCAD,KCNJ2,LRRC30,MPP3,PPP2R1B,SELENOK,SLC9A2,TMBIM6,TMEM100,ZNF436	17
Cancer,Immunological Disease,Organismal Injury and Abnormalities	hyperplasia	Hyperplasia of lymphoid organ	0.0233	0.0833				CYLD,GADD45B	2
Cell Death and Survival,Connective Tissue Development and Function	cell viability	Cell viability of fibroblasts	0.0233	0.0833				INSR,MBD4	2
Respiratory System Development and Function	morphology	Morphology of respiratory tract	0.0234	0.0837				CITED2,PDGFC,SPRY4	3
Cellular Growth and Proliferation	proliferation	Arrest in proliferation of cells	0.0241	0.0858				MAZ,MYOD1,RIPK2	3
Cell Death and Survival	apoptosis	Apoptosis of hematopoietic progenitor cells	0.0241	0.0858				CYLD,ETS2,GADD45B	3
Connective Tissue Disorders,Developmental Disorder,Gastrointestinal Disease,Organismal Development,Organismal Injury and Abnormalities,Skeletal and Muscular Disorders	congenital malformation	Congenital malformation of face	0.0248	0.0862				KCNJ2,PDGFC,SPRY4	3
Connective Tissue Development and Function,Embryonic Development,Organ Development,Organismal Development,Skeletal and Muscular System Development and Function,Tissue Development	growth	Growth of tibia	0.0249	0.0862				GADD45B	1
Cancer,Organismal Injury and Abnormalities,Respiratory Disease	ALK rearrangement positive lung squamous cell carcinoma	Advanced ALK rearrangement positive lung squamous cell carcinoma	0.0249	0.0862				INSR	1
Cellular Development,Cellular Growth and Proliferation,Embryonic Development,Organismal Development,Tissue Morphology	quantity	Quantity of neural crest cells	0.0249	0.0862				CITED2	1
Molecular Transport,Small Molecule Biochemistry	accumulation	Accumulation of lactic acid	0.0249	0.0862				TMBIM6	1
Post-Translational Modification	carbonylation	Carbonylation of protein	0.0249	0.0862				INSR	1
Cell Morphology,Cellular Assembly and Organization,Cellular Development,Cellular Function and Maintenance,Cellular Growth and Proliferation,Embryonic Development,Nervous System Development and Function,Organismal Development,Tissue Development	extension	Extension of dendrites	0.0249	0.0862				RAPGEF2	1
Cancer,Organismal Injury and Abnormalities	transformation	Transformation of liver cells	0.0249	0.0862				AFDN	1
Developmental Disorder,Skeletal and Muscular Disorders	polysyndactyly	Polysyndactyly	0.0249	0.0862				SPRY4	1
Drug Metabolism,Endocrine System Development and Function,Lipid Metabolism,Small Molecule Biochemistry	conversion	Conversion of progesterone	0.0249	0.0862				Akr1c14	1
Cancer,Endocrine System Disorders,Gastrointestinal Disease,Organismal Injury and Abnormalities	hyperplasia	Hyperplasia of beta islet cells	0.0249	0.0862				INSR	1
Connective Tissue Disorders,Organismal Injury and Abnormalities,Tissue Morphology	distribution	Abnormal distribution of adipose tissue	0.0249	0.0862				MYOD1	1
Embryonic Development,Organismal Development,Tissue Development	development	Development of trophoblast	0.0249	0.0862				ETS2	1
Connective Tissue Disorders,Organismal Injury and Abnormalities,Skeletal and Muscular Disorders,Tissue Morphology	damage	Damage of cartilage tissue	0.0254	0.0878				ADAMTS4,RIPK2	2
Cell-mediated Immune Response,Cellular Development,Cellular Function and Maintenance,Cellular Growth and Proliferation,Embryonic Development,Hematological System Development and Function,Hematopoiesis,Lymphoid Tissue Structure and Development,Organ Development,Organismal Development,Tissue Development	differentiation	Differentiation of Th1 cells	0.0258	0.0889				GADD45B,RIPK2	2
Cancer,Gastrointestinal Disease,Organismal Injury and Abnormalities	digestive system cancer	Digestive system cancer	0.0259	0.0889				ADAMTS4,ADAMTS6,ANO6,BAZ2B,CA4,CBFA2T3,CITED2,CREBRF,CYLD,CYYR1,DAGLA,DNAJB5,DUSP7,DYNC1LI2,DYNLL1,FOXN2,GPAM,GSE1,GSTM1,INSR,JCAD,KCNJ2,KCNJ8,LRRC30,MAZ,MBD4,MPP3,MYOD1,OSBPL6,PDGFC,PPP2R1B,PPP2R5A,RAPGEF2,RIPK2,SAMD4A,SLC9A2,SLC9A3R2,SOX13,SPRY4,TCP1,TMBIM6,ZNF436	42
Cancer,Gastrointestinal Disease,Organismal Injury and Abnormalities	oral squamous cell carcinoma	Oral squamous cell carcinoma	0.0259	0.0889				ADAMTS6,BAZ2B,CITED2,DNAJB5,JCAD,PPP2R5A,SAMD4A,TCP1	8
Lipid Metabolism,Molecular Transport,Small Molecule Biochemistry	concentration	Concentration of acylglycerol	0.0259	0.0889		-0.927	-0.94	DAGLA,GPAM,INSR,NFIL3	4
Gene Expression	activation	Activation of DNA endogenous promoter	0.0262	0.0896		0.227	0.118	CBFA2T3,CITED2,CREBRF,DBP,DNAJB5,ETS2,MAZ,MYOD1,NFIL3	9
Cardiovascular Disease,Hereditary Disorder,Neurological Disease,Organismal Injury and Abnormalities	ischemic stroke	Ischemic stroke	0.0267	0.0898				CA4,ETS2	2
Connective Tissue Development and Function,Skeletal and Muscular System Development and Function,Tissue Development,Tissue Morphology	area	Area of cortical bone	0.0271	0.0898				INSR	1
Developmental Disorder,Tissue Morphology	abnormal morphology	Abnormal morphology of enlarged allantois	0.0271	0.0898				RAPGEF2	1

## Sheet: Fat
# Ingenuity Pathway Analysis - Diseases and Functions - HIPPOCAMPUS
#
Categories	Function	Diseases or Functions Annotation	p-value	B-H p-value	Predicted Activation State	Activation z-score	Bias-corrected z-score	Molecules	# Molecules
Cellular Growth and Proliferation	colony formation	Colony formation	0.000569	0.0201	Increased	2.395	2.281	ATM,BCL6B,FRMD6,HAS2,PTCH1,ZBTB16,ZEB1	7
Cancer,Organismal Injury and Abnormalities	neoplasia	Neoplasia of tumor cell lines	0.0028	0.0234	Increased	2.2	2.011	BCL6B,HAS2,ROR1,SKI,ZEB1	5
Cellular Development,Cellular Growth and Proliferation	cell proliferation	Cell proliferation of carcinoma cell lines	0.00573	0.0292	Increased	2.19	2.041	HAS2,NRP2,ROR1,ZBTB16,ZEB1	5
Cellular Development,Cellular Growth and Proliferation	colony formation	Colony formation of tumor cell lines	0.00109	0.0201	Increased	2.189	2.156	BCL6B,FRMD6,HAS2,ZBTB16,ZEB1	5
Cellular Development,Cellular Growth and Proliferation	colony formation	Colony formation of cells	0.00195	0.0222	Increased	2.189	2.089	BCL6B,FRMD6,HAS2,PTCH1,ZBTB16,ZEB1	6
Cellular Movement	cell movement	Cell movement of tumor cell lines	0.0165	0.049	Increased	2.021	1.721	ARPC2,BANP,HAS2,NRP2,ROR1,SKI,ZEB1	7
Cellular Movement	migration	Migration of cells	0.00701	0.0307	Increased	2.013	1.702	ARPC2,ATM,BANP,FRMD6,HAS2,LMX1A,NRP2,OPA1,RIPOR2,ROR1,ZBTB16,ZEB1	12
Cancer,Organismal Injury and Abnormalities	metastasis	Secondary tumor	0.000859	0.0201		1.744	1.594	ATM,JARID2,MED12,NRP2,PTCH1,ROR1,SETBP1,SKI,ZEB1	9
Cellular Development,Cellular Growth and Proliferation	cell proliferation	Cell proliferation of tumor cell lines	0.000102	0.011		1.688	1.454	ATM,FRMD6,HAS2,JARID2,MED12,NRP2,PTCH1,RFX1,ROR1,SFPQ,SKI,WDR48,ZBTB16,ZEB1	14
Cellular Movement	cell movement	Cell movement	0.00645	0.0295		1.492	1.139	ARPC2,ATM,BANP,FRMD6,HAS2,LMX1A,NRP2,OPA1,RIPOR2,ROR1,SKI,ZBTB16,ZEB1	13
Cellular Growth and Proliferation,Connective Tissue Development and Function,Tissue Development	proliferation	Proliferation of connective tissue cells	0.00346	0.0241		1.216	1.022	ATM,FRMD6,HAS2,PTCH1,SKI,STIP1	6
Cell Morphology,Cellular Assembly and Organization,Cellular Function and Maintenance	formation	Formation of cellular protrusions	0.000532	0.0201		1.14	0.731	ADAP1,ARPC2,NRP2,OPA1,RFX2,RIPOR2,ROR1,STIP1,ZEB1	9
Connective Tissue Development and Function,Tissue Morphology	quantity	Quantity of connective tissue	0.0145	0.0463		1.091	0.962	ATM,BCL6B,JARID2,SLC4A4,UBR1	5
Cardiovascular System Development and Function	development	Development of vasculature	0.00152	0.0201		1.02	0.827	ATM,BCL6B,HAS2,NRP2,PTCH1,ROR1,TIPARP,UBR1,ZEB1	9
Cellular Development	differentiation	Differentiation of nervous system	0.00811	0.0331		1.017	0.791	ATM,LMX1A,MED12,UBR1,ZEB1	5
Cardiovascular System Development and Function,Organismal Development	vasculogenesis	Vasculogenesis	0.000682	0.0201		0.978	0.766	ATM,BCL6B,HAS2,NRP2,PTCH1,ROR1,TIPARP,ZEB1	8
Cellular Development,Cellular Growth and Proliferation,Connective Tissue Development and Function,Tissue Development	cell proliferation	Cell proliferation of fibroblasts	0.00869	0.0343		0.89	0.7	ATM,FRMD6,SKI,STIP1	4
Cell Cycle	cell cycle progression	Cell cycle progression	0.000247	0.0178		0.85	0.648	ATM,BANP,FRMD6,HAS2,JARID2,PTCH1,SFPQ,SKI,ZBTB16,ZEB1	10
Cellular Assembly and Organization,Cellular Function and Maintenance	organization	Organization of cytoskeleton	4.3e-05	0.0068		0.849	0.46	ADAP1,ARHGAP10,ARPC2,BCL6B,GCC2,HAS2,NRP2,OPA1,RFX2,RIPOR2,ROR1,STIP1,ZEB1	13
Cellular Assembly and Organization,Cellular Function and Maintenance	organization	Microtubule dynamics	4.18e-05	0.0068		0.849	0.461	ADAP1,ARPC2,BCL6B,GCC2,HAS2,NRP2,OPA1,RFX2,RIPOR2,ROR1,STIP1,ZEB1	12
Cellular Growth and Proliferation	cytostasis	Cytostasis	0.00289	0.0234		0.152	-0.037	HAS2,SKI,ZBTB16,ZEB1	4
Cellular Development,Cellular Growth and Proliferation,Embryonic Development	proliferation	Proliferation of embryonic cell lines	0.0032	0.0234		0.068	-0.073	ATM,PTCH1,SKI,STIP1	4
Gene Expression	activation	Activation of DNA endogenous promoter	0.000185	0.0164		-0.026	-0.24	ATM,BCL6B,JARID2,LMX1A,MED12,PTCH1,RFX2,SFPQ,SKI,ZBTB16,ZEB1	11
Gene Expression	transcription	Transcription of RNA	0.00195	0.0222		-0.092	-0.307	ATM,BANP,BCL6B,JARID2,LMX1A,MED12,PTCH1,RFX2,SFPQ,SKI,ZBTB16,ZEB1	12
Cancer,Organismal Injury and Abnormalities	cancer	Cancer of cells	0.00244	0.0234		-0.103	-0.143	ATM,BANP,BCL6B,CYP4F22,FRMD6,GCC2,HAS2,JARID2,MED12,NRP2,OPA1,PTCH1,ROR1,SETBP1,SFPQ,SKI,STIP1,UBR1,ZBTB16,ZEB1	20
Gene Expression	transcription	Transcription of DNA	0.00036	0.0201		-0.264	-0.444	ATM,BANP,BCL6B,JARID2,LMX1A,MED12,PTCH1,RFX2,SFPQ,SKI,ZBTB16,ZEB1	12
Cell Death and Survival	apoptosis	Apoptosis	0.00685	0.0301		-0.304	-0.134	ARHGAP10,ATM,BANP,BCL6B,HAS2,OPA1,PTCH1,ROR1,SFPQ,SKI,STIP1,WDR48,ZBTB16,ZEB1	14
Gene Expression	expression	Expression of RNA	0.00476	0.0263		-0.346	-0.549	ATM,BANP,BCL6B,JARID2,LMX1A,MED12,PTCH1,RFX2,SFPQ,SKI,TIPARP,ZBTB16,ZEB1	13
Gene Expression	transcription	Transcription	0.00276	0.0234		-0.363	-0.593	ATM,BANP,BCL6B,JARID2,LMX1A,MED12,PTCH1,RFX2,SFPQ,SKI,TIPARP,ZBTB16,ZEB1	13
Cellular Growth and Proliferation,Tissue Development	proliferation	Proliferation of epithelial cells	0.00122	0.0201		-0.391	-0.507	ATM,HAS2,PTCH1,SKI,WDR48,ZBTB16	6
Tissue Development	growth	Growth of epithelial tissue	0.00163	0.0201		-0.79	-0.934	ATM,HAS2,NRP2,PTCH1,SKI,WDR48,ZBTB16	7
Developmental Disorder	dysgenesis	Dysgenesis	0.000466	0.0201		-0.849	-0.335	ATM,HAS2,LMX1A,OPA1,PTCH1,SKI,ZEB1	7
Developmental Disorder	hypoplasia	Hypoplasia	0.00154	0.0201		-0.849	-0.332	ATM,HAS2,LMX1A,OPA1,SKI,ZEB1	6
Gene Expression	repression	Repression of RNA	0.000462	0.0201		-0.918	-1.336	BCL6B,JARID2,SKI,ZBTB16	4
Developmental Disorder	growth failure	Growth Failure	0.00302	0.0234		-0.928	-0.284	ACSS1,ATM,BCL6B,HAS2,SLC4A4,ZEB1	6
Cell Death and Survival	apoptosis	Apoptosis of tumor cell lines	0.00494	0.0263		-1.233	-1.147	ATM,BANP,BCL6B,OPA1,ROR1,SFPQ,WDR48,ZBTB16,ZEB1	9
Cell Death and Survival	necrosis	Necrosis	0.000768	0.0201		-1.282	-1.153	ATM,BANP,BCL6B,FRMD6,HAS2,LMX1A,NRP2,OPA1,PTCH1,ROR1,SFPQ,SKI,STIP1,WDR48,ZBTB16,ZEB1	16
Cell Death and Survival	cell death	Cell death of tumor cell lines	0.00229	0.0234		-1.701	-1.604	ATM,BANP,BCL6B,FRMD6,NRP2,OPA1,ROR1,SFPQ,WDR48,ZBTB16,ZEB1	11
Organismal Survival	organismal death	Organismal death	0.000853	0.0201		-1.869	-0.98	ACSS1,ATM,HAS2,MED12,NRP2,OPA1,PTCH1,ROR1,SETBP1,SKI,SLC4A4,STIP1,TIPARP,UBR1,ZEB1	15
Nervous System Development and Function	development	Development of central nervous system	5.02e-08	7.6e-05				ATM,JARID2,LMX1A,MED12,NRP2,PTCH1,ROR1,SKI,STIP1,UBR1,ZBTB16,ZEB1	12
Skeletal and Muscular System Development and Function	morphogenesis	Morphogenesis of skeletal system	5.4e-07	0.000409				HAS2,MED12,SKI,TIPARP,WDR48,ZEB1	6
Embryonic Development,Organismal Development	development	Development of body axis	2.18e-06	0.0011				ATM,LMX1A,MED12,NRP2,PTCH1,ROR1,SKI,SLC4A4,STIP1,TIPARP,UBR1,ZBTB16,ZEB1	13
Connective Tissue Development and Function,Skeletal and Muscular System Development and Function,Tissue Development	morphogenesis	Morphogenesis of bone	5.3e-06	0.002				HAS2,MED12,SKI,ZEB1	4
Embryonic Development,Organismal Development	development	Development of head	6.85e-06	0.00207				ATM,LMX1A,MED12,NRP2,PTCH1,ROR1,SKI,SLC4A4,STIP1,TIPARP,UBR1,ZEB1	12
Neurological Disease	cognitive impairment	Cognitive impairment	3.08e-05	0.0068				ATM,MED12,NRP2,OPA1,PDHB,SETBP1,SKI,UBR1,ZBTB16	9
Embryonic Development,Nervous System Development and Function,Organ Development,Organismal Development,Tissue Development	formation	Formation of brain	3.56e-05	0.0068				ATM,LMX1A,MED12,NRP2,PTCH1,SKI,STIP1,UBR1	8
Cardiovascular System Development and Function,Embryonic Development,Organ Development,Organismal Development,Tissue Development	cardiogenesis	Cardiogenesis	4.5e-05	0.0068				ATM,HAS2,JARID2,MED12,NRP2,PTCH1,STIP1,UBR1	8
Developmental Disorder,Neurological Disease	mental retardation	Mental retardation	6.83e-05	0.00938				MED12,NRP2,OPA1,PDHB,SETBP1,SKI,ZBTB16	7
Cellular Development,Embryonic Development,Organismal Development	differentiation	Differentiation of neuronal progenitor cells	7.52e-05	0.00948				LMX1A,PTCH1,ROR1	3
Connective Tissue Disorders,Developmental Disorder,Gastrointestinal Disease,Organismal Development,Organismal Injury and Abnormalities,Skeletal and Muscular Disorders	congenital malformation	Congenital malformation of face	8.88e-05	0.0103				MED12,PTCH1,ROR1,SETBP1,SKI	5
Embryonic Development,Organismal Development,Tissue Development,Tissue Morphology	closure	Closure of neural tube	0.000119	0.012				MED12,OPA1,PTCH1,SKI	4
Cancer,Dermatological Diseases and Conditions,Organismal Injury and Abnormalities	basal cell carcinosarcoma	Basal cell carcinosarcoma in forearm	0.000148	0.014				ATM,PTCH1	2
Cancer,Cellular Development,Organismal Injury and Abnormalities	immortalization	Immortalization of myeloid progenitor cells	0.00021	0.0176				SETBP1,ZBTB16	2
Developmental Disorder,Skeletal and Muscular Disorders	congenital anomaly of digit	Congenital anomaly of digit	0.000227	0.0178				MED12,PTCH1,SKI,ZBTB16	4
Lipid Metabolism,Nucleic Acid Metabolism,Small Molecule Biochemistry	synthesis	Synthesis of acetyl-coenzyme A	0.000244	0.0178				ACSS1,PDHB	2
Connective Tissue Development and Function,Skeletal and Muscular System Development and Function,Tissue Development	development	Cartilage development	0.000333	0.0201				PTCH1,XYLT1,ZBTB16,ZEB1	4
Cancer,Hematological Disease,Immunological Disease,Organismal Injury and Abnormalities	lymphocytic leukemia	Lymphocytic leukemia	0.000333	0.0201				ATM,JARID2,MED12,OPA1,ROR1,SKI,ZBTB16,ZEB1	8
Cancer,Organismal Injury and Abnormalities	head and neck carcinoma	Head and neck carcinoma	0.000344	0.0201				ACSS1,ADAP1,ARHGAP10,ARPC2,ATM,BANP,BCL6B,CYP4F22,FRMD6,GCC2,HAS2,JARID2,KLHDC7A,LMX1A,MED12,NRP2,OPA1,PDHB,PTCH1,RFX1,RFX2,RIPOR2,SETBP1,SFPQ,SKI,SLC4A4,STIP1,SULT1B1,TIPARP,UBR1,WDR48,XYLT1,ZEB1	33
Cancer,Endocrine System Disorders,Organismal Injury and Abnormalities	epithelial thyroid cancer	Thyroid carcinoma	0.000348	0.0201				ACSS1,ADAP1,ARHGAP10,ARPC2,ATM,BANP,BCL6B,CYP4F22,FRMD6,GCC2,JARID2,KLHDC7A,LMX1A,MED12,NRP2,OPA1,PDHB,PTCH1,RFX1,RFX2,RIPOR2,SETBP1,SFPQ,SKI,SLC4A4,STIP1,SULT1B1,TIPARP,UBR1,WDR48,XYLT1,ZEB1	32
Cancer,Hematological Disease,Immunological Disease,Organismal Injury and Abnormalities	T-cell leukemia	T-cell leukemia	0.000367	0.0201				ATM,JARID2,MED12,SKI,ZEB1	5
Auditory Disease,Hereditary Disorder,Neurological Disease,Organismal Injury and Abnormalities	hereditary hearing loss	Hereditary hearing loss	0.000379	0.0201				LMX1A,RIPOR2,ROR1,UBR1	4
Gastrointestinal Disease,Organismal Injury and Abnormalities	obstruction	Obstruction of intestine	0.000414	0.0201				NRP2,PTCH1,SLC4A4	3
Developmental Disorder,Skeletal and Muscular Disorders	polydactyly	Polydactyly	0.000504	0.0201				PTCH1,SKI,ZBTB16	3
Embryonic Development,Organismal Development	patterning	Patterning of embryo	0.000553	0.0201				PTCH1,SKI,ZBTB16	3
Organismal Development,Skeletal and Muscular System Development and Function	morphology	Morphology of hindlimb	0.00057	0.0201				OPA1,ZBTB16,ZEB1	3
Embryonic Development,Organismal Development,Skeletal and Muscular System Development and Function	morphogenesis	Morphogenesis of embryonic limb	0.000605	0.0201				PTCH1,SKI,ZBTB16	3
Developmental Disorder,Neurological Disease	syndromic mental retardation	Syndromic mental retardation	0.000717	0.0201				MED12,SETBP1,SKI,ZBTB16	4
Cellular Movement	migration	Migration of melanoma cells	0.000733	0.0201				ZBTB16,ZEB1	2
Organ Development,Organ Morphology,Skeletal and Muscular System Development and Function	mass	Mass of skeletal muscle	0.000758	0.0201				OPA1,SKI,UBR1	3
Cellular Development,Reproductive System Development and Function	differentiation	Differentiation of breast cell lines	0.000796	0.0201				SKI,ZEB1	2
Cell Death and Survival,Embryonic Development	apoptosis	Apoptosis of embryonic cells	0.000911	0.0201				ATM,PTCH1,SKI	3
Embryonic Development,Organismal Development	development	Development of body trunk	0.000913	0.0201				ATM,HAS2,JARID2,MED12,NRP2,PTCH1,STIP1,TIPARP,UBR1,ZEB1	10
Lymphoid Tissue Structure and Development,Organ Morphology,Tissue Morphology	quantity	Quantity of spleen	0.000935	0.0201				ATM,SLC4A4,ZEB1	3
Developmental Disorder,Hereditary Disorder,Neurological Disease,Organismal Injury and Abnormalities	familial mental retardation	Familial mental retardation	0.000979	0.0201				MED12,OPA1,SETBP1,SKI,ZBTB16	5
Developmental Disorder,Neurological Disease	neurocristopathy syndrome	Neurocristopathy syndrome	0.000982	0.0201				NRP2,PTCH1,SKI	3
Cancer,Organismal Injury and Abnormalities	growth	Growth of head and neck tumor	0.00131	0.0201				ATM,PTCH1	2
Auditory Disease,Hereditary Disorder,Neurological Disease,Organismal Injury and Abnormalities	autosomal recessive deafness	Autosomal recessive deafness	0.00133	0.0201				RIPOR2,ROR1,UBR1	3
Organismal Injury and Abnormalities,Reproductive System Disease	abnormal growth	Abnormal growth in endometrium	0.00136	0.0201				ADAP1,ATM,BCL6B,FRMD6,HAS2,JARID2,MED12,NRP2,PTCH1,RIPOR2,SETBP1,SFPQ,SLC4A4,XYLT1,ZBTB16,ZEB1	16
Organismal Injury and Abnormalities,Reproductive System Disease	abnormality of endometrium	Abnormality of endometrium	0.00139	0.0201				ADAP1,ATM,BCL6B,FRMD6,HAS2,JARID2,MED12,NRP2,PTCH1,RIPOR2,SETBP1,SFPQ,SLC4A4,XYLT1,ZBTB16,ZEB1	16
Cellular Development	immortalization	Immortalization	0.00142	0.0201				ATM,SETBP1,ZBTB16	3
Cancer,Dermatological Diseases and Conditions,Organismal Injury and Abnormalities	cutaneous melanoma	Cutaneous melanoma	0.00143	0.0201				ADAP1,ARPC2,ATM,BCL6B,CYP4F22,GCC2,HAS2,KLHDC7A,LMX1A,MED12,NRP2,PTCH1,RFX2,RIPOR2,ROR1,SETBP1,SKI,SLC4A4,SULT1B1,TIPARP,UBR1,WDR48,XYLT1,ZBTB16,ZEB1	25
Cellular Development,Hair and Skin Development and Function	differentiation	Differentiation of epithelial cell lines	0.00148	0.0201				SKI,ZEB1	2
Connective Tissue Disorders,Developmental Disorder,Neurological Disease,Organismal Injury and Abnormalities,Skeletal and Muscular Disorders	exencephaly	Exencephaly	0.00148	0.0201				PTCH1,ROR1,SKI	3
Cancer,Organismal Injury and Abnormalities	cancer	Cancer of secretory structure	0.00155	0.0201				ACSS1,ADAP1,ARHGAP10,ARPC2,ATM,BANP,BCL6B,CYP4F22,FRMD6,GCC2,JARID2,KLHDC7A,LMX1A,MED12,NRP2,OPA1,PDHB,PTCH1,RFX1,RFX2,RIPOR2,SETBP1,SFPQ,SKI,SLC4A4,STIP1,SULT1B1,TIPARP,UBR1,WDR48,XYLT1,ZBTB16,ZEB1	33
Developmental Disorder,Gastrointestinal Disease,Hereditary Disorder,Neurological Disease,Organismal Injury and Abnormalities	Hirschsprung disease 1	Hirschsprung disease 1	0.00156	0.0201				NRP2,PTCH1	2
Dermatological Diseases and Conditions,Hereditary Disorder,Organismal Injury and Abnormalities	autosomal recessive congenital ichthyosis type 5	Autosomal recessive congenital ichthyosis type 5	0.00167	0.0201				CYP4F22	1
Cancer,Cell-To-Cell Signaling and Interaction,Inflammatory Response	cytotoxic reaction	Cytotoxic reaction of lymphoblastoid cell lines	0.00167	0.0201				ATM	1
Hereditary Disorder,Metabolic Disease,Organismal Injury and Abnormalities,Renal and Urological Disease	proximal renal tubular acidosis with ocular abnormalities	Proximal renal tubular acidosis with ocular abnormalities	0.00167	0.0201				SLC4A4	1
Cancer,Cardiovascular Disease,Dermatological Diseases and Conditions,Developmental Disorder,Hereditary Disorder,Immunological Disease,Metabolic Disease,Neurological Disease,Organismal Injury and Abnormalities	ataxia-telangiectasia	Autosomal recessive ataxia-telangiectasia	0.00167	0.0201				ATM	1
Amino Acid Metabolism,Endocrine System Development and Function,Post-Translational Modification,Small Molecule Biochemistry	sulfation	Sulfation of L-triiodothyronine	0.00167	0.0201				SULT1B1	1
Connective Tissue Disorders,Developmental Disorder,Gastrointestinal Disease,Neurological Disease,Organismal Development,Organismal Injury and Abnormalities,Skeletal and Muscular Disorders	Schinzel-Giedion midface retraction syndrome	Schinzel-Giedion midface retraction syndrome	0.00167	0.0201				SETBP1	1
Nervous System Development and Function	fasciculation	Fasciculation of spinal nerve	0.00167	0.0201				NRP2	1
Organismal Functions	weakness	Weakness of dentin	0.00167	0.0201				SLC4A4	1
Cell Cycle	G1 phase	Delay in G1 phase of lymphoblastoid cell lines	0.00167	0.0201				ATM	1
Developmental Disorder,Hereditary Disorder,Neurological Disease,Ophthalmic Disease,Organismal Injury and Abnormalities	Behr syndrome	Behr syndrome	0.00167	0.0201				OPA1	1
Cellular Assembly and Organization	fusion	Fusion of mitochondrial inner membrane	0.00167	0.0201				OPA1	1
Nervous System Development and Function	organization	Organization of cranial nerve	0.00167	0.0201				NRP2	1
Developmental Disorder,Hereditary Disorder,Metabolic Disease,Neurological Disease,Organismal Injury and Abnormalities	deficiency of pyruvate dehydrogenase e1-beta	Deficiency of pyruvate dehydrogenase e1-beta	0.00167	0.0201				PDHB	1
Cancer,Connective Tissue Disorders,Dental Disease,Gastrointestinal Disease,Organismal Injury and Abnormalities,Skeletal and Muscular Disorders	keratocystic odontogenic tumor	Keratocystic odontogenic tumor in mandible	0.00167	0.0201				PTCH1	1
Embryonic Development	regression	Regression of rhombic lip	0.00167	0.0201				LMX1A	1
Cardiovascular System Development and Function,Tissue Morphology	quantity	Quantity of Tip cells	0.00167	0.0201				BCL6B	1
Auditory Disease,Hereditary Disorder,Neurological Disease,Organismal Injury and Abnormalities	autosomal recessive deafness type 104	Autosomal recessive deafness type 104	0.00167	0.0201				RIPOR2	1
Hereditary Disorder,Metabolic Disease,Neurological Disease,Ophthalmic Disease,Organismal Injury and Abnormalities	optic atrophy 1	Optic atrophy 1	0.00167	0.0201				OPA1	1
Developmental Disorder,Hereditary Disorder,Metabolic Disease,Neurological Disease,Organismal Injury and Abnormalities,Skeletal and Muscular Disorders	mitochondrial DNA depletion syndrome-14	Mitochondrial DNA depletion syndrome-14	0.00167	0.0201				OPA1	1
Hereditary Disorder,Metabolic Disease,Neurological Disease,Ophthalmic Disease,Organismal Injury and Abnormalities	dominant optic atrophy plus syndrome	Dominant optic atrophy plus syndrome	0.00167	0.0201				OPA1	1
Cellular Assembly and Organization,Nervous System Development and Function	defasciculation	Defasciculation of sensory neurons	0.00167	0.0201				NRP2	1
Embryonic Development,Nervous System Development and Function,Organismal Development	neuralization	Neuralization of embryo	0.00167	0.0201				SKI	1
Cell Cycle,Reproductive System Development and Function	prophase	Arrest in prophase of spermatocytes	0.00167	0.0201				ATM	1
Tissue Development	growth	Growth of somatic tissue	0.00167	0.0201				ATM	1
Cancer,Cellular Development,Organismal Injury and Abnormalities	immortalization	Immortalization of short-term hematopoietic stem cells	0.00167	0.0201				ZBTB16	1
Auditory Disease,Neurological Disease	hearing loss	Severe hearing loss	0.00167	0.0201				ROR1	1
Cellular Function and Maintenance	vesiculation	Vesiculation of lysosome	0.00167	0.0201				WDR48	1
Connective Tissue Disorders,Developmental Disorder,Gastrointestinal Disease,Hereditary Disorder,Neurological Disease,Organismal Development,Organismal Injury and Abnormalities,Skeletal and Muscular Disorders	holoprosencephaly-7	Holoprosencephaly-7	0.00167	0.0201				PTCH1	1
Developmental Disorder,Hereditary Disorder,Ophthalmic Disease,Organismal Injury and Abnormalities	posterior polymorphous corneal dystrophy 3	Posterior polymorphous corneal dystrophy 3	0.00167	0.0201				ZEB1	1
Developmental Disorder,Hereditary Disorder,Neurological Disease,Organismal Injury and Abnormalities	autosomal dominant mental retardation type 29	Autosomal dominant mental retardation type 29	0.00167	0.0201				SETBP1	1
Inflammatory Disease,Inflammatory Response,Organismal Injury and Abnormalities,Skeletal and Muscular Disorders,Skeletal and Muscular System Development and Function	inflammation	Inflammation of gastrocnemius	0.00167	0.0201				OPA1	1
Developmental Disorder,Ophthalmic Disease,Organismal Injury and Abnormalities	fuchs endothelial corneal dystrophy type 6	Fuchs endothelial corneal dystrophy type 6	0.00167	0.0201				ZEB1	1
Tissue Morphology	remodeling	Remodeling of capillary vessel	0.00167	0.0201				BCL6B	1
Connective Tissue Disorders,Developmental Disorder,Hereditary Disorder,Neurological Disease,Organismal Injury and Abnormalities,Skeletal and Muscular Disorders	Lujan-Fryns syndrome	Lujan-Fryns syndrome	0.00167	0.0201				MED12	1
Metabolic Disease,Neurological Disease,Organismal Injury and Abnormalities	alkalinization	Alkalinization of hippocampal neurons	0.00167	0.0201				SLC4A4	1
Embryonic Development,Nervous System Development and Function,Organ Development,Organismal Development,Tissue Development	development	Development of habenulopeduncular tract	0.00167	0.0201				NRP2	1
Cardiovascular Disease,Cellular Compromise,Organismal Injury and Abnormalities	dysfunction	Dysfunction of vascular endothelial cells	0.00167	0.0201				ATM	1
Connective Tissue Disorders,Developmental Disorder,Gastrointestinal Disease,Hereditary Disorder,Neurological Disease,Ophthalmic Disease,Organismal Development,Organismal Injury and Abnormalities,Skeletal and Muscular Disorders	X linked Ohdo syndrome	X linked Ohdo syndrome	0.00167	0.0201				MED12	1
Nervous System Development and Function	pathfinding	Pathfinding of vomeronasal nerve	0.00167	0.0201				NRP2	1
Neurological Disease,Tissue Morphology	degeneration	Degeneration of neuropil	0.00167	0.0201				ATM	1
Cancer,Cardiovascular Disease,Dermatological Diseases and Conditions,Developmental Disorder,Hereditary Disorder,Immunological Disease,Metabolic Disease,Neurological Disease,Organismal Injury and Abnormalities	ataxia-telangiectasia variant	Ataxia-telangiectasia variant	0.00167	0.0201				ATM	1
Auditory Disease,Developmental Disorder,Endocrine System Disorders,Hereditary Disorder,Metabolic Disease,Neurological Disease,Organismal Injury and Abnormalities	Johanson-Blizzard syndrome	Johanson-Blizzard syndrome	0.00167	0.0201				UBR1	1
Connective Tissue Disorders,Developmental Disorder,Hereditary Disorder,Organismal Injury and Abnormalities,Skeletal and Muscular Disorders	Shprintzen-Goldberg craniosynostosis syndrome	Shprintzen-Goldberg craniosynostosis syndrome	0.00167	0.0201				SKI	1
Connective Tissue Disorders,Developmental Disorder,Hereditary Disorder,Metabolic Disease,Organismal Injury and Abnormalities,Skeletal and Muscular Disorders	Desbuquois syndrome type 2	Desbuquois syndrome type 2	0.00167	0.0201				XYLT1	1
Cell Death and Survival,Cellular Compromise,Neurological Disease,Tissue Morphology	degeneration	Degeneration of presynaptic terminals	0.00167	0.0201				ATM	1
Cancer,Cellular Development,Cellular Growth and Proliferation,Organismal Injury and Abnormalities,Tissue Morphology,Tumor Morphology	quantity	Quantity of thymic lymphoma cells	0.00167	0.0201				ATM	1
Tissue Morphology	quantity	Quantity of urothelial cells	0.00167	0.0201				ATM	1
Connective Tissue Disorders,Developmental Disorder,Hereditary Disorder,Neurological Disease,Organismal Injury and Abnormalities,Reproductive System Disease,Skeletal and Muscular Disorders	skeletal defects, genital hypoplasia, and mental retardation	Skeletal defects, genital hypoplasia, and mental retardation	0.00167	0.0201				ZBTB16	1
Cell Morphology,Cellular Function and Maintenance,Organ Morphology	paracellular permeability	Paracellular permeability of podocytes	0.00167	0.0201				ZEB1	1
Cancer,Hereditary Disorder,Organismal Injury and Abnormalities,Reproductive System Disease	bilateral familial breast cancer	Bilateral familial breast cancer	0.00167	0.0201				ATM	1
Cell Cycle	S phase	Entry into S phase of bladder cancer cell lines	0.00167	0.0201				ATM	1
Cardiovascular System Development and Function,Organismal Development	development	Development of great artery	0.00167	0.0201				ROR1	1
Cancer,Cardiovascular Disease,Dermatological Diseases and Conditions,Developmental Disorder,Hereditary Disorder,Immunological Disease,Metabolic Disease,Neurological Disease,Organismal Injury and Abnormalities	complementation group E ataxia-telangiectasia	Complementation group E ataxia-telangiectasia	0.00167	0.0201				ATM	1
Cellular Assembly and Organization	accumulation	Accumulation of early endosomes	0.00167	0.0201				NRP2	1
Cell Cycle,Connective Tissue Development and Function,DNA Replication, Recombination, and Repair	S phase checkpoint control	S phase checkpoint control of fibroblasts	0.00167	0.0201				ATM	1
Nervous System Development and Function	organization	Organization of spinal nerve	0.00167	0.0201				NRP2	1
Cancer,Cellular Development,Organismal Injury and Abnormalities	immortalization	Immortalization of long-term hematopoietic stem cells	0.00167	0.0201				ZBTB16	1
Cell Morphology,Cellular Movement,Nervous System Development and Function,Tissue Development	innervation	Innervation of olfactory glomeruli	0.00167	0.0201				NRP2	1
Cellular Assembly and Organization	accumulation	Accumulation of late endosomes	0.00167	0.0201				NRP2	1
Cell Cycle,Embryonic Development	G1 phase	G1 phase of neural tube cells	0.00167	0.0201				PTCH1	1
Cellular Compromise,Organismal Injury and Abnormalities	atrophy	Atrophy of velate astrocytes	0.00167	0.0201				ATM	1
Organismal Development,Organismal Injury and Abnormalities	abnormal morphology	Abnormal morphology of head	0.00173	0.0206				ATM,MED12,PTCH1,ROR1,SETBP1,SKI,SLC4A4,ZEB1	8
Cellular Assembly and Organization,Nervous System Development and Function	fasciculation	Fasciculation of axons	0.00175	0.0206				NRP2,ROR1	2
Cancer,Hematological Disease,Immunological Disease,Organismal Injury and Abnormalities	lymphocytic cancer	Lymphocytic cancer	0.00192	0.0222				ATM,CYP4F22,JARID2,MED12,OPA1,PTCH1,ROR1,SKI,STIP1,UBR1,ZBTB16,ZEB1	12
Cell Cycle,Cellular Development,Connective Tissue Development and Function	replicative senescence	Replicative senescence of fibroblast cell lines	0.00194	0.0222				ARHGAP10,ATM	2
Cancer,Hematological Disease,Organismal Injury and Abnormalities	lymphocytic neoplasm	Lymphocytic neoplasm	0.00194	0.0222				ATM,CYP4F22,JARID2,MED12,OPA1,PTCH1,ROR1,SKI,STIP1,UBR1,ZBTB16,ZEB1	12
Cancer,Hematological Disease,Immunological Disease,Organismal Injury and Abnormalities	neoplasia	Neoplasia of leukocytes	0.002	0.0225				ATM,CYP4F22,JARID2,MED12,OPA1,PTCH1,ROR1,SKI,STIP1,UBR1,ZBTB16,ZEB1	12
Cellular Assembly and Organization,Cellular Function and Maintenance	quantity	Quantity of filopodia	0.00204	0.0227				BCL6B,HAS2	2
Cell Morphology,Cellular Function and Maintenance,Nervous System Development and Function,Tissue Morphology	length	Length of dendrites	0.00204	0.0227				ATM,NRP2	2
Cardiovascular Disease,Cardiovascular System Development and Function,Organ Morphology,Organismal Development,Organismal Injury and Abnormalities	abnormal morphology	Abnormal morphology of trabeculae carne	0.00214	0.0233				HAS2,UBR1	2
Embryonic Development,Organ Development,Organismal Development,Skeletal and Muscular System Development and Function,Tissue Development	formation	Formation of smooth muscle	0.00214	0.0233				HAS2,TIPARP	2
Cellular Movement	invasion	Invasion of kidney cell lines	0.00214	0.0233				HAS2,ZEB1	2
Embryonic Development,Nervous System Development and Function,Organ Development,Organismal Development,Tissue Development	formation	Formation of forebrain	0.00223	0.0234				NRP2,PTCH1,SKI,UBR1	4
Organismal Development,Skeletal and Muscular Disorders,Skeletal and Muscular System Development and Function	abnormal morphology	Abnormal morphology of hindlimb	0.00225	0.0234				ZBTB16,ZEB1	2
Cancer,Hematological Disease,Immunological Disease,Organismal Injury and Abnormalities	adult T cell leukemia	Adult T cell leukemia	0.00232	0.0234				JARID2,SKI,ZEB1	3
Cancer,Organismal Injury and Abnormalities	abdominal adenocarcinoma	Abdominal adenocarcinoma	0.00233	0.0234				ACSS1,ADAP1,ARHGAP10,ARPC2,ATM,BANP,BCL6B,CYP4F22,FRMD6,GCC2,HAS2,JARID2,KLHDC7A,LMX1A,MED12,NRP2,OPA1,PDHB,PTCH1,RFX1,RFX2,RIPOR2,ROR1,SETBP1,SFPQ,SKI,SLC4A4,TIPARP,UBR1,WDR48,XYLT1,ZBTB16,ZEB1	33
Embryonic Development,Organismal Development	morphogenesis	Morphogenesis of face	0.00235	0.0234				SKI,TIPARP	2
Cancer,Gastrointestinal Disease,Organismal Injury and Abnormalities	malignant neoplasm of large intestine	Malignant neoplasm of large intestine	0.00238	0.0234				ACSS1,ADAP1,ARHGAP10,ATM,BANP,BCL6B,CYP4F22,FRMD6,GCC2,HAS2,JARID2,KLHDC7A,MED12,NRP2,OPA1,PDHB,PTCH1,RFX1,RFX2,ROR1,SETBP1,SFPQ,SKI,SLC4A4,STIP1,TIPARP,UBR1,WDR48,XYLT1,ZBTB16,ZEB1	31
Cancer,Gastrointestinal Disease,Organismal Injury and Abnormalities	large intestine carcinoma	Large intestine carcinoma	0.00245	0.0234				ACSS1,ADAP1,ARHGAP10,ATM,BANP,BCL6B,CYP4F22,FRMD6,GCC2,HAS2,JARID2,KLHDC7A,MED12,NRP2,OPA1,PTCH1,RFX1,RFX2,ROR1,SETBP1,SFPQ,SKI,SLC4A4,STIP1,TIPARP,UBR1,WDR48,XYLT1,ZBTB16,ZEB1	30
Embryonic Development,Organismal Development	morphogenesis	Morphogenesis of embryo	0.00245	0.0234				PTCH1,SKI,ZBTB16,ZEB1	4
Embryonic Development,Organismal Development	morphogenesis	Morphogenesis of head	0.00248	0.0234				MED12,SKI,TIPARP,ZEB1	4
Embryonic Development,Organismal Development,Skeletal and Muscular System Development and Function	morphogenesis	Morphogenesis of hindlimb	0.00257	0.0234				PTCH1,ZBTB16	2
Carbohydrate Metabolism,Molecular Transport,Small Molecule Biochemistry	quantity	Quantity of glycosaminoglycan	0.00269	0.0234				HAS2,XYLT1	2
Digestive System Development and Function	development	Development of digestive system	0.00272	0.0234				JARID2,PTCH1,SKI,SLC4A4,TIPARP	5
Cancer,Organismal Injury and Abnormalities,Skeletal and Muscular Disorders	myosarcoma	Myosarcoma	0.00272	0.0234				ADAP1,ATM,MED12,PTCH1,SKI	5
Cellular Development	differentiation	Differentiation of stem cells	0.00281	0.0234				JARID2,LMX1A,PTCH1,ROR1	4
Developmental Disorder,Neurological Disease	intellectual disability and congenital malformations	Intellectual disability and congenital malformations	0.00292	0.0234				MED12,SETBP1	2
Cancer,Organismal Injury and Abnormalities	head and neck squamous cell cancer	Head and neck squamous cell carcinoma	0.00293	0.0234				ATM,BANP,BCL6B,FRMD6,GCC2,HAS2,MED12,NRP2,OPA1,PTCH1,SETBP1,SFPQ,ZEB1	13
Cancer,Organismal Injury and Abnormalities	melanoma	Melanoma	0.00304	0.0234				ADAP1,ARHGAP10,ARPC2,ATM,BCL6B,CYP4F22,GCC2,HAS2,JARID2,KLHDC7A,LMX1A,MED12,NRP2,PTCH1,RFX2,RIPOR2,ROR1,SETBP1,SKI,SLC4A4,SULT1B1,TIPARP,UBR1,WDR48,XYLT1,ZBTB16,ZEB1	27
Respiratory System Development and Function	development	Development of upper respiratory tract	0.00304	0.0234				PTCH1,SKI	2
Cellular Function and Maintenance,Nervous System Development and Function	function	Function of neuroglia	0.00317	0.0234				ATM,STIP1	2
Cancer,Hematological Disease,Immunological Disease,Organismal Injury and Abnormalities	lymphomagenesis	Delay in lymphomagenesis of thymus gland	0.00334	0.0234				ATM	1
Cancer,Hematological Disease,Immunological Disease,Organismal Injury and Abnormalities	early-onset B-cell lymphoma	Early-onset B-cell lymphoma	0.00334	0.0234				ATM	1
Cell Death and Survival,Cellular Compromise,Neurological Disease,Tissue Morphology	degeneration	Degeneration of postsynaptic terminals	0.00334	0.0234				ATM	1
Cell Cycle	G1 checkpoint	G1 checkpoint of tumor cell lines	0.00334	0.0234				ATM	1
Cellular Assembly and Organization,Cellular Function and Maintenance	remodeling	Remodeling of basement membrane	0.00334	0.0234				HAS2	1
Cancer,Developmental Disorder,Embryonic Development,Organismal Injury and Abnormalities	hyperplasia	Hyperplasia of granule neuron progenitor cells	0.00334	0.0234				PTCH1	1
Cellular Development,Reproductive System Development and Function,Tissue Development	epithelial-mesenchymal transition	Epithelial-mesenchymal transition of mammary epithelial cells	0.00334	0.0234				ZEB1	1
Cancer,Organismal Injury and Abnormalities	sarcoma	Sarcoma in abdomen	0.00334	0.0234				PTCH1	1
Cell Death and Survival,Cell Morphology,Nervous System Development and Function,Neurological Disease,Organ Morphology,Organismal Development,Organismal Injury and Abnormalities,Tissue Morphology	loss	Loss of Golgi interneurons	0.00334	0.0234				ATM	1
Carbohydrate Metabolism,Drug Metabolism,Small Molecule Biochemistry	aggregation	Aggregation of hyaluronic acid	0.00334	0.0234				HAS2	1
Cancer,Gastrointestinal Disease,Organismal Injury and Abnormalities,Skeletal and Muscular Disorders	rhabdomyosarcoma	Rhabdomyosarcoma in tongue	0.00334	0.0234				PTCH1	1
Cell Death and Survival,Cell Morphology,Embryonic Development,Nervous System Development and Function,Organ Morphology,Organismal Development,Tissue Morphology	loss	Loss of cerebellar granule neuron precursor cells	0.00334	0.0234				ATM	1
Cellular Growth and Proliferation	clonogenicity	Clonogenicity of melanoma cell lines	0.00334	0.0234				SKI	1
Cancer,Cellular Compromise,Organismal Injury and Abnormalities	damage	Damage of thymic lymphoma cells	0.00334	0.0234				ATM	1
Digestive System Development and Function,Gastrointestinal Disease,Organ Morphology,Organismal Development,Organismal Injury and Abnormalities	abnormal morphology	Abnormal morphology of small cecum	0.00334	0.0234				SLC4A4	1
Cardiovascular System Development and Function	hypertrabeculation	Hypertrabeculation of heart ventricle	0.00334	0.0234				JARID2	1
Cancer,Hematological Disease,Immunological Disease,Organismal Injury and Abnormalities	tumorigenesis	Delay in tumorigenesis of lymphoma	0.00334	0.0234				ATM	1
Cell Cycle,DNA Replication, Recombination, and Repair	modulation	Modulation of chromatin	0.00334	0.0234				BANP	1
Hematological System Development and Function,Hematopoiesis,Lymphoid Tissue Structure and Development,Tissue Morphology	quantity	Quantity of promyelocytes	0.00334	0.0234				ZBTB16	1
Cellular Development,Cellular Growth and Proliferation,Nervous System Development and Function,Tissue Development	development	Development of projection neurons	0.00334	0.0234				NRP2	1
Cell Death and Survival,Cell Morphology,Nervous System Development and Function,Neurological Disease,Tissue Morphology	loss	Loss of basket interneurons	0.00334	0.0234				ATM	1
Cell-To-Cell Signaling and Interaction,Inflammatory Response	antibody-dependent cell-mediated cytotoxicity	Antibody-dependent cell-mediated cytotoxicity of melanoma cell lines	0.00334	0.0234				ROR1	1
Inflammatory Response	inflammatory response	Inflammatory response of spleen	0.00334	0.0234				ZBTB16	1
Organismal Injury and Abnormalities	deformation	Deformation of digit	0.00334	0.0234				SKI	1
Cellular Assembly and Organization,Cellular Function and Maintenance	organization	Organization of microfilaments	0.00334	0.0234				HAS2	1
Cancer,Organismal Injury and Abnormalities,Reproductive System Disease	endometrial stromal sarcoma	Endometrial stromal sarcoma in fibrous tissue	0.00334	0.0234				MED12	1
Infectious Diseases	reactivation	Reactivation of Epstein-Barr virus Akata strain	0.00334	0.0234				ZEB1	1
Skeletal and Muscular System Development and Function	fusion	Fusion of metatarsal bone	0.00334	0.0234				ZBTB16	1
Cell Death and Survival,Embryonic Development,Nervous System Development and Function	survival	Survival of neural tube cells	0.00334	0.0234				PTCH1	1
Infectious Diseases	production	Production of JC virus	0.00334	0.0234				ATM	1
Cancer,Embryonic Development,Tissue Morphology	transformation	Transformation of mesenchyme	0.00334	0.0234				HAS2	1
Cellular Compromise,Organismal Injury and Abnormalities	degeneration	Degeneration of spermatocytes	0.00334	0.0234				ATM	1
Cancer,Neurological Disease,Organismal Injury and Abnormalities	development	Delay in initiation of development of medulloblastoma	0.00334	0.0234				PTCH1	1
Cancer,Organismal Injury and Abnormalities,Skeletal and Muscular Disorders	rhabdomyosarcoma	Rhabdomyosarcoma in leg	0.00334	0.0234				PTCH1	1
Cell Death and Survival,Cell Morphology,Nervous System Development and Function,Neurological Disease,Tissue Morphology	loss	Loss of stellate interneurons	0.00334	0.0234				ATM	1
Cancer,Hematological Disease,Organismal Injury and Abnormalities	therapy-related myelodysplastic syndrome	Therapy-related myelodysplastic syndrome	0.00334	0.0234				SETBP1	1
Cell-To-Cell Signaling and Interaction	signaling	Signaling of endothelial cell lines	0.00334	0.0234				NRP2	1
Cell Morphology,Cellular Assembly and Organization,Cellular Development,Cellular Function and Maintenance,Cellular Growth and Proliferation,Embryonic Development,Nervous System Development and Function,Organismal Development,Tissue Development	branching	Branching of sympathetic axons	0.00334	0.0234				ROR1	1
Cell Death and Survival	apoptosis	Apoptosis of mucosal-associated invariant T lymphocytes	0.00334	0.0234				ZBTB16	1
Cancer,Organismal Injury and Abnormalities	metastasis	Metastasis of kidney cell lines	0.00334	0.0234				ZEB1	1
Cancer,Cell Cycle,DNA Replication, Recombination, and Repair,Organismal Injury and Abnormalities	DNA damage checkpoint	DNA damage checkpoint of lymphoma cells	0.00334	0.0234				ATM	1
Cancer,Gastrointestinal Disease,Organismal Injury and Abnormalities	sarcoma	Sarcoma in intestine	0.00334	0.0234				PTCH1	1
Endocrine System Development and Function,Organ Development,Tissue Development	function	Function of exocrine region of pancreas	0.00334	0.0234				UBR1	1
Embryonic Development,Nervous System Development and Function,Organ Morphology,Organismal Development,Tissue Morphology	area	Area of external granular layer	0.00334	0.0234				PTCH1	1
Developmental Disorder,Organismal Injury and Abnormalities	bleeding	Bleeding of embryo	0.00334	0.0234				NRP2	1
Cell-mediated Immune Response,Cellular Development,Cellular Function and Maintenance,Cellular Growth and Proliferation,Embryonic Development,Hematological System Development and Function,Hematopoiesis,Lymphoid Tissue Structure and Development,Organ Development,Organismal Development,Tissue Development	development	Development of type II natural killer T cells	0.00334	0.0234				ZBTB16	1
Ophthalmic Disease,Organismal Injury and Abnormalities	corneal abrasion	Corneal abrasion	0.00334	0.0234				ZEB1	1
Tissue Development	formation	Formation of white matter	0.00334	0.0234				ATM	1
Connective Tissue Disorders,Developmental Disorder,Hereditary Disorder,Organismal Injury and Abnormalities,Skeletal and Muscular Disorders	Desbuquois syndrome type 1	Desbuquois syndrome type 1	0.00334	0.0234				XYLT1	1
Embryonic Development,Organismal Development,Tissue Development	development	Development of roof plate	0.00334	0.0234				LMX1A	1
Cancer,Dermatological Diseases and Conditions,Organismal Injury and Abnormalities	sporadic basal cell cancer	Sporadic basal cell carcinoma	0.00334	0.0234				PTCH1	1
Lymphoid Tissue Structure and Development,Organ Morphology,Tissue Morphology	quantity	Quantity of splenocytes	0.00355	0.0245				ATM,ZEB1	2
Organismal Injury and Abnormalities	hydrops fetalis	Hydrops fetalis	0.00355	0.0245				ROR1,ZEB1	2
Cancer,Organismal Injury and Abnormalities	abdominal carcinoma	Abdominal carcinoma	0.00358	0.0245				ACSS1,ADAP1,ARHGAP10,ARPC2,ATM,BANP,BCL6B,CYP4F22,FRMD6,GCC2,HAS2,JARID2,KLHDC7A,LMX1A,MED12,NRP2,OPA1,PDHB,PTCH1,RFX1,RFX2,RIPOR2,ROR1,SETBP1,SFPQ,SKI,SLC4A4,STIP1,TIPARP,UBR1,WDR48,XYLT1,ZBTB16,ZEB1	34
Cell Cycle	cell cycle progression	Cell cycle progression of tumor cell lines	0.00359	0.0245				BANP,FRMD6,SFPQ,ZEB1	4
Cell Death and Survival,Embryonic Development	cell viability	Cell viability of embryonic cells	0.00368	0.0251				ATM,PTCH1	2
Cancer,Organismal Injury and Abnormalities,Reproductive System Disease	endometrial cancer	Endometrial cancer	0.00371	0.0251				ATM,BCL6B,FRMD6,HAS2,JARID2,MED12,NRP2,PTCH1,RIPOR2,SETBP1,SFPQ,SLC4A4,XYLT1,ZBTB16,ZEB1	15
Cancer,Organismal Injury and Abnormalities	genitourinary carcinoma	Genitourinary carcinoma	0.00372	0.0251				ARHGAP10,ARPC2,ATM,BANP,BCL6B,FRMD6,GCC2,HAS2,JARID2,LMX1A,MED12,NRP2,PDHB,PTCH1,RFX2,RIPOR2,SETBP1,SFPQ,SLC4A4,TIPARP,UBR1,WDR48,XYLT1,ZBTB16,ZEB1	25
Cellular Development,Cellular Growth and Proliferation,Reproductive System Development and Function	cell proliferation	Cell proliferation of breast cell lines	0.00374	0.0251				ATM,FRMD6,HAS2	3
Cancer,Organismal Injury and Abnormalities,Reproductive System Disease	prostatic adenocarcinoma	Prostatic adenocarcinoma	0.00379	0.0254				ARHGAP10,ATM,BANP,JARID2,LMX1A,MED12,NRP2,PTCH1,RFX2,TIPARP,UBR1,WDR48,XYLT1,ZBTB16,ZEB1	15
Digestive System Development and Function	development	Development of gastrointestinal tract	0.00383	0.0255				PTCH1,SKI,SLC4A4,TIPARP	4
Developmental Disorder,Neurological Disease,Organismal Injury and Abnormalities	congenital malformation	Congenital malformation of brain	0.00386	0.0256				LMX1A,PTCH1,ROR1,SKI	4
Organismal Development,Skeletal and Muscular System Development and Function	morphology	Morphology of limb	0.00393	0.026				OPA1,ROR1,ZBTB16,ZEB1	4
Cancer,Cardiovascular Disease,Organismal Injury and Abnormalities	hemangioblastoma	Hemangioblastoma	0.00396	0.026				NRP2,PTCH1	2
Cancer,Hematological Disease,Organismal Injury and Abnormalities	hematologic cancer	Hematologic cancer of cells	0.00397	0.026				ATM,CYP4F22,JARID2,MED12,OPA1,ROR1,SKI,STIP1,UBR1,ZBTB16,ZEB1	11
Cancer,Organismal Injury and Abnormalities,Skeletal and Muscular Disorders	muscle tumor	Muscle tumor	0.004	0.0261				ADAP1,ATM,MED12,PTCH1,SKI,ZEB1	6
Cell Cycle	cell cycle progression	Re-entry into cell cycle progression	0.0041	0.0263				ATM,SKI	2
Connective Tissue Disorders,Hereditary Disorder,Organismal Injury and Abnormalities	hereditary connective tissue disorder	Hereditary connective tissue disorder	0.00417	0.0263				MED12,PTCH1,SETBP1,SKI,XYLT1,ZBTB16	6
Embryonic Development,Nervous System Development and Function,Organ Development,Organismal Development,Tissue Development	formation	Formation of mesencephalon	0.00424	0.0263				LMX1A,NRP2	2
Cancer,Organismal Injury and Abnormalities	genitourinary adenocarcinoma	Genitourinary adenocarcinoma	0.00433	0.0263				ARHGAP10,ARPC2,ATM,BANP,BCL6B,FRMD6,HAS2,JARID2,LMX1A,MED12,NRP2,PDHB,PTCH1,RFX2,RIPOR2,SETBP1,SLC4A4,TIPARP,UBR1,WDR48,XYLT1,ZBTB16,ZEB1	23
Metabolic Disease,Organismal Injury and Abnormalities	metabolic acidosis	Metabolic acidosis	0.00438	0.0263				PDHB,SLC4A4	2
Hereditary Disorder,Neurological Disease,Organismal Injury and Abnormalities	autosomal recessive neurological disorder	Autosomal recessive neurological disorder	0.00442	0.0263				ATM,OPA1,RIPOR2,ROR1,UBR1,ZBTB16	6
Organismal Injury and Abnormalities,Renal and Urological Disease	renal lesion	Renal lesion	0.00443	0.0263				ARPC2,ATM,MED12,PDHB,PTCH1,SETBP1,SKI,SLC4A4,ZEB1	9
Cancer,Neurological Disease,Organismal Injury and Abnormalities	central nervous system solid tumor	Central nervous system solid tumor	0.00443	0.0263				ATM,BANP,MED12,NRP2,PTCH1,RFX1,SETBP1,SKI,WDR48	9
Cancer,Hematological Disease,Immunological Disease,Organismal Injury and Abnormalities	leukemia	Leukemia	0.00448	0.0263				ATM,GCC2,JARID2,MED12,NRP2,OPA1,PTCH1,ROR1,SETBP1,SKI,ZBTB16,ZEB1	12
Cancer,Organismal Injury and Abnormalities,Renal and Urological Disease	bladder carcinoma	Bladder carcinoma	0.00451	0.0263				ATM,GCC2,JARID2,MED12,NRP2,PTCH1,SETBP1,ZEB1	8
Embryonic Development,Nervous System Development and Function,Organ Development,Organismal Development,Tissue Development	formation	Formation of telencephalon	0.00457	0.0263				NRP2,PTCH1,SKI	3
Cancer,Hematological Disease,Immunological Disease,Organismal Injury and Abnormalities	incidence	Incidence of lymphoma	0.00464	0.0263				ATM,SKI,ZEB1	3
Cellular Growth and Proliferation	cell focus formation	Cell focus formation	0.00468	0.0263				ATM,PTCH1	2
Cellular Development	epithelial-mesenchymal transition	Epithelial-mesenchymal transition of breast cancer cell lines	0.00483	0.0263				BANP,ZEB1	2
Organ Morphology,Skeletal and Muscular System Development and Function	quantity	Quantity of rib	0.00483	0.0263				PTCH1,ZBTB16	2
Developmental Disorder,Hereditary Disorder,Neurological Disease,Organismal Injury and Abnormalities	familial syndromic intellectual disability	Familial syndromic intellectual disability	0.00483	0.0263				MED12,SKI,ZBTB16	3
Cancer,Organismal Injury and Abnormalities	transitional cell epithelial cancer	Transitional-cell carcinoma	0.0049	0.0263				ATM,MED12,PTCH1,SETBP1	4
Cancer,Dermatological Diseases and Conditions,Hereditary Disorder,Organismal Injury and Abnormalities	basal cell nevus syndrome	Autosomal dominant basal cell nevus syndrome	0.00501	0.0263				PTCH1	1
Cell Morphology,Cellular Function and Maintenance	repair	Repair of neurons	0.00501	0.0263				ATM	1
Cancer,Hematological Disease,Immunological Disease,Organismal Injury and Abnormalities	B-lymphoblastic leukemia/lymphoma with intrachromosomal amplification of chromosome 21	B-lymphoblastic leukemia/lymphoma with intrachromosomal amplification of chromosome 21	0.00501	0.0263				PTCH1	1
Cardiovascular Disease	angiectasis	Angiectasis	0.00501	0.0263				PTCH1	1
Cell Cycle,Hematological System Development and Function,Humoral Immune Response	cell division	Delay in cell division of memory B cells	0.00501	0.0263				ZBTB16	1
Connective Tissue Disorders,Hereditary Disorder,Organismal Injury and Abnormalities	pseudoxanthoma elasticum	Autosomal recessive pseudoxanthoma elasticum	0.00501	0.0263				XYLT1	1
Cellular Development,Cellular Growth and Proliferation	colony formation	Colony formation of mesothelioma cell lines	0.00501	0.0263				ZBTB16	1
Cellular Development	transition	Transition of kidney cell lines	0.00501	0.0263				SKI	1
Cellular Assembly and Organization,DNA Replication, Recombination, and Repair	formation	Formation of DNA double strand break site	0.00501	0.0263				ATM	1
Cellular Compromise	disorganization	Disorganization of mitochondrial cristae	0.00501	0.0263				OPA1	1
Cell Cycle	S phase	S phase of lymphoblastoid cell lines	0.00501	0.0263				ATM	1
Connective Tissue Development and Function,Connective Tissue Disorders,Organ Morphology,Organismal Development,Organismal Injury and Abnormalities,Skeletal and Muscular Disorders,Skeletal and Muscular System Development and Function,Tissue Development	lack	Lack of frontal bone	0.00501	0.0263				SKI	1
Cell Cycle	premature senescence	Premature senescence of vascular endothelial cells	0.00501	0.0263				ATM	1
Dermatological Diseases and Conditions,Organismal Injury and Abnormalities	formation	Formation of nevus	0.00501	0.0263				ATM	1
Infectious Diseases	replication	Replication of human herpesvirus 4	0.00501	0.0263				ZEB1	1
Skeletal and Muscular System Development and Function	development	Development of symphysis	0.00501	0.0263				ROR1	1
Cellular Assembly and Organization,Cellular Development,Cellular Function and Maintenance,Cellular Growth and Proliferation,Tissue Development	formation	Formation of alveolar epithelial lamellar bodies	0.00501	0.0263				ZEB1	1
Cell Cycle,DNA Replication, Recombination, and Repair	checkpoint control	Checkpoint control of lymphoblastoid cell lines	0.00501	0.0263				ATM	1
Cellular Development,Cellular Growth and Proliferation,Embryonic Development,Nervous System Development and Function,Organismal Development,Tissue Development	proliferation	Proliferation of neural tube cells	0.00501	0.0263				PTCH1	1
Cancer,Cell Death and Survival,Cellular Function and Maintenance,Organismal Injury and Abnormalities,Tumor Morphology	colony survival	Colony survival of glioblastoma cancer stem cells	0.00501	0.0263				ATM	1
Cancer,Dermatological Diseases and Conditions,Hereditary Disorder,Metabolic Disease,Organismal Injury and Abnormalities	xeroderma pigmentosum complementation group A	Xeroderma pigmentosum complementation group A	0.00501	0.0263				PTCH1	1
Cancer,Cell Death and Survival,Organismal Injury and Abnormalities,Tumor Morphology	apoptosis	Apoptosis of thymic lymphoma cells	0.00501	0.0263				ATM	1
Lipid Metabolism,Molecular Transport,Small Molecule Biochemistry	quantity	Quantity of arachidic acid	0.00501	0.0263				CERS4	1
Cellular Development,Cellular Growth and Proliferation	colony formation	Colony formation of fibrosarcoma cell lines	0.00501	0.0263				HAS2	1
Cellular Function and Maintenance	elimination	Elimination of tumor cells	0.00501	0.0263				ATM	1
Cell Cycle	cell cycle progression	Arrest in cell cycle progression of thymocytes	0.00501	0.0263				ATM	1
Cell Death and Survival,Cellular Function and Maintenance	colony survival	Colony survival of bone cancer cell lines	0.00501	0.0263				ATM	1
Nucleic Acid Metabolism	quantity	Quantity of NADP	0.00501	0.0263				ATM	1
Developmental Disorder,Hereditary Disorder,Neurological Disease,Organismal Injury and Abnormalities,Skeletal and Muscular Disorders	fg syndrome	Fg syndrome	0.00501	0.0263				MED12	1
Cancer,Dermatological Diseases and Conditions,Organismal Injury and Abnormalities	infiltrative basal cell carcinoma	Infiltrative basal cell carcinoma	0.00501	0.0263				PTCH1	1
Cell-mediated Immune Response,Cellular Development,Cellular Function and Maintenance,Cellular Growth and Proliferation,Embryonic Development,Hematological System Development and Function,Hematopoiesis,Lymphoid Tissue Structure and Development,Organ Development,Organismal Development,Tissue Development	development	Development of innate T lymphocytes	0.00501	0.0263				ZBTB16	1
Cellular Development,Hair and Skin Development and Function	epithelial to mesenchymal transdifferentiation	Epithelial to mesenchymal transdifferentiation of epithelial cell lines	0.00501	0.0263				ZEB1	1
Carbohydrate Metabolism,Drug Metabolism,Small Molecule Biochemistry	retention	Retention of hyaluronic acid	0.00501	0.0263				HAS2	1
Cellular Movement,Nervous System Development and Function	chemorepulsion	Chemorepulsion of hippocampal neurons	0.00501	0.0263				NRP2	1
Cardiovascular System Development and Function,Cell Morphology,Cellular Development,Organismal Development,Tissue Development	sprouting	Sprouting of Tip cells	0.00501	0.0263				NRP2	1
Cancer,Neurological Disease,Organismal Injury and Abnormalities	sporadic medulloblastoma	Sporadic medulloblastoma	0.00501	0.0263				PTCH1	1
Embryonic Development,Organ Development,Organ Morphology,Organismal Development,Respiratory System Development and Function,Tissue Development	morphogenesis	Morphogenesis of nose	0.00501	0.0263				SKI	1
Cancer,Skeletal and Muscular Disorders,Tissue Morphology	transformation	Transformation of vertebrae	0.00514	0.0269				SKI,ZBTB16	2
Cell Cycle	senescence	Senescence of cells	0.00516	0.0269				ARHGAP10,ATM,OPA1,ZEB1	4
Cancer,Organismal Injury and Abnormalities	serous adenocarcinoma	Serous adenocarcinoma	0.00523	0.0271				ATM,HAS2,RIPOR2,SLC4A4,TIPARP,ZBTB16,ZEB1	7
Embryonic Development,Hematological System Development and Function,Lymphoid Tissue Structure and Development,Organ Development,Organismal Development,Tissue Development	formation	Formation of thymus gland	0.00523	0.0271				ATM,JARID2,ZEB1	3
Embryonic Development,Organismal Development	somitogenesis	Somitogenesis	0.00529	0.0272				ATM,MED12	2
Developmental Disorder,Embryonic Development,Organismal Development,Tissue Morphology	abnormal morphology	Abnormal morphology of mesenchyme	0.00529	0.0272				HAS2,SKI	2
Cellular Assembly and Organization,Cellular Function and Maintenance	quantity	Quantity of cellular protrusions	0.0053	0.0272				ARPC2,BCL6B,HAS2	3
Lipid Metabolism,Molecular Transport,Small Molecule Biochemistry	accumulation	Accumulation of cholesterol	0.00562	0.0287				ATM,OPA1	2
Cancer,Gastrointestinal Disease,Organismal Injury and Abnormalities	large intestine adenocarcinoma	Large intestine adenocarcinoma	0.00598	0.0295				ACSS1,ADAP1,ARHGAP10,ATM,BANP,BCL6B,CYP4F22,FRMD6,GCC2,HAS2,JARID2,KLHDC7A,MED12,NRP2,OPA1,PTCH1,RFX1,RFX2,ROR1,SETBP1,SFPQ,SKI,SLC4A4,TIPARP,UBR1,WDR48,XYLT1,ZBTB16,ZEB1	29
Cancer,Gastrointestinal Disease,Organismal Injury and Abnormalities	digestive system cancer	Digestive system cancer	0.00603	0.0295				ACSS1,ADAP1,ARHGAP10,ATM,BANP,BCL6B,CYP4F22,FRMD6,GCC2,HAS2,JARID2,KLHDC7A,LMX1A,MED12,NRP2,OPA1,PDHB,PTCH1,RFX1,RFX2,RIPOR2,ROR1,SETBP1,SFPQ,SKI,SLC4A4,STIP1,TIPARP,UBR1,WDR48,XYLT1,ZBTB16,ZEB1	33
Cancer,Neurological Disease,Organismal Injury and Abnormalities	glioma formation	Glioma	0.00604	0.0295				ATM,BANP,MED12,NRP2,PTCH1,SETBP1,SKI,WDR48	8
Cell Morphology,Cellular Assembly and Organization,Cellular Development,Cellular Function and Maintenance,Cellular Growth and Proliferation,Embryonic Development,Nervous System Development and Function,Organismal Development,Tissue Development	branching	Branching of neurites	0.00607	0.0295				ADAP1,NRP2,OPA1,ROR1	4
Endocrine System Disorders,Organismal Injury and Abnormalities,Reproductive System Disease	degeneration	Degeneration of seminiferous tubule	0.00611	0.0295				ATM,ZBTB16	2
Developmental Disorder	thoracic hypoplasia	Thoracic hypoplasia	0.00625	0.0295				ATM,HAS2,ZEB1	3
Cancer,Organismal Injury and Abnormalities	development	Development of melanoma	0.00629	0.0295				JARID2,ZEB1	2
Cancer,Organismal Injury and Abnormalities,Respiratory Disease	neoplasia	Neoplasia of lung cancer cell lines	0.00629	0.0295				ROR1,SKI	2
Cancer,Organismal Injury and Abnormalities	development	Development of benign tumor	0.0063	0.0295				ATM,MED12,NRP2,PTCH1,SLC4A4	5
Cellular Development,Cellular Growth and Proliferation,Renal and Urological System Development and Function	cell proliferation	Cell proliferation of kidney cell lines	0.00664	0.0295				HAS2,PTCH1,SFPQ	3
Cancer,Hematological Disease,Immunological Disease,Organismal Injury and Abnormalities	T cell lymphomagenesis	T cell lymphomagenesis	0.00667	0.0295				ATM	1
Cellular Assembly and Organization,Cellular Function and Maintenance	organization	Organization of mitochondrial inner membrane	0.00667	0.0295				OPA1	1
Developmental Disorder,Embryonic Development,Organismal Development,Tissue Morphology	lack	Lack of interparietal bone	0.00667	0.0295				SKI	1
Cancer,Organismal Injury and Abnormalities	malignancy	Malignancy of acute leukemia cells	0.00667	0.0295				ZBTB16	1
Connective Tissue Development and Function,Connective Tissue Disorders,Organ Morphology,Organismal Development,Organismal Injury and Abnormalities,Skeletal and Muscular Disorders,Skeletal and Muscular System Development and Function,Tissue Development	lack	Lack of fibula	0.00667	0.0295				ZBTB16	1
Cancer,Dermatological Diseases and Conditions,Hematological Disease,Organismal Injury and Abnormalities	blastic plasmacytoid dendritic cell neoplasm of skin	Blastic plasmacytoid dendritic cell neoplasm of skin	0.00667	0.0295				ATM	1
Cancer,Cellular Development,Cellular Growth and Proliferation,Hematological Disease,Immunological Disease,Organismal Injury and Abnormalities,Tumor Morphology	proliferation	Proliferation of thymic lymphoma cells	0.00667	0.0295				ATM	1
Cell-To-Cell Signaling and Interaction	signaling	Signaling of astrocytes	0.00667	0.0295				SLC4A4	1
Embryonic Development,Organ Development,Organismal Development,Skeletal and Muscular System Development and Function,Tissue Development	formation	Formation of intimal cushion	0.00667	0.0295				HAS2	1
Embryonic Development,Organismal Development,Tissue Development	formation	Formation of mesenchyme	0.00667	0.0295				HAS2	1
Amino Acid Metabolism,Molecular Transport,Small Molecule Biochemistry	quantity	Quantity of L-cysteine	0.00667	0.0295				ATM	1
Connective Tissue Disorders,Developmental Disorder,Gastrointestinal Disease,Organismal Development,Organismal Injury and Abnormalities,Skeletal and Muscular Disorders	abnormal morphology	Abnormal morphology of flat face	0.00667	0.0295				SKI	1
Cancer,Cellular Development,Organismal Injury and Abnormalities,Tumor Morphology	differentiation	Arrest in differentiation of acute leukemia cells	0.00667	0.0295				ZBTB16	1
Connective Tissue Development and Function,Connective Tissue Disorders,Organ Morphology,Organismal Development,Organismal Injury and Abnormalities,Skeletal and Muscular Disorders,Skeletal and Muscular System Development and Function,Tissue Development	lack	Lack of parietal bone	0.00667	0.0295				SKI	1
Cellular Response to Therapeutics	radiosensitivity	Radiosensitivity of cancer cells	0.00667	0.0295				ATM	1
Connective Tissue Development and Function,Connective Tissue Disorders,Organ Morphology,Organismal Development,Organismal Injury and Abnormalities,Skeletal and Muscular Disorders,Skeletal and Muscular System Development and Function,Tissue Development	abnormal morphology	Abnormal morphology of talus	0.00667	0.0295				ZBTB16	1
Connective Tissue Development and Function,Connective Tissue Disorders,Organismal Injury and Abnormalities,Skeletal and Muscular Disorders,Skeletal and Muscular System Development and Function,Tissue Development	abnormal morphology	Abnormal morphology of xiphoid process foramen	0.00667	0.0295				ZBTB16	1
Nervous System Development and Function	fasciculation	Fasciculation of cranial nerve	0.00667	0.0295				NRP2	1
Cell Cycle,Nervous System Development and Function	cell cycle progression	Re-entry into cell cycle progression of Schwann cells	0.00667	0.0295				SKI	1
Small Molecule Biochemistry	conversion	Conversion of acetate	0.00667	0.0295				ACSS1	1
Cell Cycle	karyokinesis	Karyokinesis	0.00667	0.0295				ATM	1
Cell Morphology,Cellular Assembly and Organization,Tissue Development	tubulation	Tubulation of mitochondria	0.00667	0.0295				OPA1	1
Cell Death and Survival,Cellular Function and Maintenance	colony survival	Colony survival of sarcoma cell lines	0.00667	0.0295				ATM	1
Cancer,Cellular Growth and Proliferation,Organismal Injury and Abnormalities,Tumor Morphology	cytostasis	Cytostasis of leukemia cells	0.00667	0.0295				ZBTB16	1
Cardiovascular Disease,Developmental Disorder,Organismal Injury and Abnormalities	hypoplasia	Hypoplasia of atrium	0.00667	0.0295				HAS2	1
Cellular Development	lifespan	Lifespan of embryonic cell lines	0.00667	0.0295				ATM	1
Connective Tissue Development and Function,Organ Morphology,Organismal Development,Skeletal and Muscular System Development and Function,Tissue Development,Tissue Morphology	diameter	Diameter of fibula	0.00667	0.0295				ZBTB16	1
Cellular Development,Nervous System Development and Function,Tissue Development	differentiation	Differentiation of Cajal-Retzius neurons	0.00667	0.0295				LMX1A	1
Cancer,Dermatological Diseases and Conditions,Neurological Disease,Organismal Injury and Abnormalities	choroid plexus papilloma	Choroid plexus papilloma	0.00667	0.0295				PTCH1	1
Cell Morphology	polarization	Polarization of peripheral T lymphocyte	0.00667	0.0295				RIPOR2	1
Cancer,Hematological Disease,Immunological Disease,Organismal Injury and Abnormalities	leukemic transformation of chronic myelomonocytic leukemia	Leukemic transformation of chronic myelomonocytic leukemia	0.00667	0.0295				SETBP1	1
Endocrine System Development and Function,Lipid Metabolism,Small Molecule Biochemistry,Vitamin and Mineral Metabolism	steroidogenesis	Steroidogenesis of pregnenolone	0.00667	0.0295				OPA1	1
Cancer,Hereditary Disorder,Organismal Injury and Abnormalities,Respiratory Disease	familial non-small cell lung cancer	Familial non-small cell lung cancer	0.00667	0.0295				ATM	1
Cell-To-Cell Signaling and Interaction,Cellular Assembly and Organization,Nervous System Development and Function	penetration	Penetration of axons	0.00667	0.0295				NRP2	1
Skeletal and Muscular Disorders	abnormality	Abnormality of limb	0.00677	0.0298				OPA1,ROR1,ZBTB16,ZEB1	4
Cancer,Organismal Injury and Abnormalities	pelvic adenocarcinoma	Pelvic adenocarcinoma	0.00703	0.0307				ARHGAP10,ATM,BANP,BCL6B,FRMD6,HAS2,JARID2,LMX1A,MED12,NRP2,PTCH1,RFX2,RIPOR2,SETBP1,SLC4A4,TIPARP,UBR1,WDR48,XYLT1,ZBTB16,ZEB1	21
Cancer,Hematological Disease,Immunological Disease,Organismal Injury and Abnormalities	B-cell neoplasm	B-cell neoplasm	0.00719	0.0313				ATM,CYP4F22,JARID2,MED12,PTCH1,ROR1,STIP1,UBR1,ZBTB16	9
Cancer,Hematological Disease,Organismal Injury and Abnormalities	hematologic cancer	Hematologic cancer	0.0072	0.0313				ATM,CYP4F22,GCC2,JARID2,MED12,NRP2,OPA1,PTCH1,ROR1,SETBP1,SKI,STIP1,UBR1,ZBTB16,ZEB1	15
Cancer,Organismal Injury and Abnormalities	genitourinary tumor	Genitourinary tumor	0.0073	0.0316				ARHGAP10,ARPC2,ATM,BANP,BCL6B,FRMD6,GCC2,HAS2,JARID2,LMX1A,MED12,NRP2,OPA1,PDHB,PTCH1,RFX2,RIPOR2,SETBP1,SFPQ,SLC4A4,STIP1,TIPARP,UBR1,WDR48,XYLT1,ZBTB16,ZEB1	27
Cellular Development,Cellular Growth and Proliferation	cell proliferation	Cell proliferation of melanoma cell lines	0.00738	0.0319				ATM,SFPQ,SKI	3
Cancer,Hematological Disease,Organismal Injury and Abnormalities	neoplasia	Neoplasia of blood cells	0.00749	0.0323				ATM,CYP4F22,GCC2,JARID2,MED12,NRP2,OPA1,PTCH1,ROR1,SETBP1,SKI,STIP1,UBR1,ZBTB16,ZEB1	15
Connective Tissue Development and Function,Embryonic Development,Organismal Development,Skeletal and Muscular System Development and Function,Tissue Development	formation	Formation of skull	0.00754	0.0323				MED12,ZEB1	2
Connective Tissue Disorders,Organismal Injury and Abnormalities,Skeletal and Muscular Disorders,Skeletal and Muscular System Development and Function	abnormal morphology	Abnormal morphology of axial skeleton	0.00755	0.0323				PTCH1,SKI,ZBTB16	3
Cancer,Hematological Disease,Immunological Disease,Organismal Injury and Abnormalities	chronic leukemia	Chronic leukemia	0.0076	0.0324				ATM,JARID2,ROR1,SETBP1,ZBTB16	5
Developmental Disorder,Hereditary Disorder,Neurological Disease,Organismal Injury and Abnormalities	recessive mental retardation	Recessive mental retardation	0.00763	0.0324				MED12,OPA1,ZBTB16	3
Cellular Development,Tissue Development	differentiation	Differentiation of epithelial cells	0.00763	0.0324				LMX1A,PTCH1,SULT1B1,ZEB1	4
Skeletal and Muscular Disorders	abnormality	Abnormality of lower limb	0.0079	0.0331				OPA1,ZBTB16,ZEB1	3
Cell Cycle	cell cycle progression	Arrest in cell cycle progression	0.00833	0.0331				ATM,SKI,ZBTB16,ZEB1	4
Cancer,Organismal Injury and Abnormalities	tumorigenesis	Tumorigenesis of fibrosarcoma cell lines	0.00833	0.0331				HAS2	1
Cancer,Endocrine System Disorders,Organismal Injury and Abnormalities	formation	Formation of thyroid carcinoma	0.00833	0.0331				PTCH1	1
DNA Replication, Recombination, and Repair	deletion	Deletion of DNA	0.00833	0.0331				ATM	1
Organismal Injury and Abnormalities	dysplastic nevus	Dysplastic nevus	0.00833	0.0331				ATM	1
Developmental Disorder,Hereditary Disorder,Neurological Disease,Ophthalmic Disease,Organismal Injury and Abnormalities	Axenfeld-Rieger syndrome	Axenfeld-Rieger syndrome	0.00833	0.0331				PTCH1	1
Cancer,Hematological Disease,Immunological Disease,Organismal Injury and Abnormalities	chronic neutrophilic leukemia	Chronic neutrophilic leukemia	0.00833	0.0331				SETBP1	1
Developmental Disorder,Embryonic Development,Organismal Development,Tissue Morphology	abnormal morphology	Abnormal morphology of ectomesenchyme	0.00833	0.0331				SKI	1
Cell Morphology,Cellular Assembly and Organization	morphology	Morphology of mitochondrial cristae	0.00833	0.0331				OPA1	1
Cancer,Organismal Injury and Abnormalities,Reproductive System Disease	mammary fibroadenoma	Mammary fibroadenoma	0.00833	0.0331				MED12	1
Cell Cycle,Gene Expression	binding	Binding of progesterone response element	0.00833	0.0331				SFPQ	1
Cell Death and Survival,Embryonic Development	apoptosis	Apoptosis of neural tube cells	0.00833	0.0331				PTCH1	1
Cardiovascular System Development and Function,Cell Cycle,Cellular Development	senescence	Senescence of endothelial cell lines	0.00833	0.0331				ATM	1
DNA Replication, Recombination, and Repair	double-stranded DNA break repair	Delay in double-stranded DNA break repair	0.00833	0.0331				ATM	1
Developmental Disorder,Hereditary Disorder,Ophthalmic Disease,Organismal Injury and Abnormalities	irido-corneo-trabecular dysgenesis	Irido-corneo-trabecular dysgenesis	0.00833	0.0331				PTCH1	1
Cancer,Dermatological Diseases and Conditions,Organismal Injury and Abnormalities	nodular basal cell carcinoma	Nodular basal cell carcinoma	0.00833	0.0331				PTCH1	1
Organismal Injury and Abnormalities	formation	Formation of cartilage nodule	0.00833	0.0331				PTCH1	1
Cellular Development,Reproductive System Development and Function	epithelial to mesenchymal transdifferentiation	Epithelial to mesenchymal transdifferentiation of breast cell lines	0.00833	0.0331				ZEB1	1
Cancer,Hematological Disease,Immunological Disease,Organismal Injury and Abnormalities	chronic lymphocytic leukemia	Newly diagnosed chronic lymphocytic leukemia	0.00833	0.0331				ATM	1
Cancer,Cell Cycle,Organismal Injury and Abnormalities	G2/M phase	G2/M phase of glioma cells	0.00833	0.0331				ATM	1
Cell Cycle	aneuploidy	Aneuploidy of thymocytes	0.00833	0.0331				ATM	1
Cancer,Organismal Injury and Abnormalities,Reproductive System Disease	benign breast phyllodes tumor	Benign breast phyllodes tumor	0.00833	0.0331				MED12	1
Embryonic Development,Hematological System Development and Function,Lymphoid Tissue Structure and Development,Organ Development,Organismal Development,Tissue Development	formation	Formation of lymphoid tissue	0.00845	0.0335				ATM,JARID2,NRP2,ZEB1	4
Cancer,Organismal Injury and Abnormalities,Renal and Urological Disease	renal cancer	Renal cancer	0.0085	0.0336				ARPC2,ATM,MED12,PDHB,PTCH1,SETBP1,SLC4A4,ZEB1	8
Endocrine System Development and Function,Small Molecule Biochemistry	metabolism	Metabolism of hormone	0.00909	0.0358				OPA1,SULT1B1,TIPARP	3
Embryonic Development,Organ Development,Organismal Development,Reproductive System Development and Function,Tissue Development	gonadogenesis	Gonadogenesis	0.00991	0.0377				ATM,RFX2,TIPARP,WDR48,ZBTB16	5
Cancer,Dermatological Diseases and Conditions,Organismal Injury and Abnormalities	formation	Formation of basal-cell carcinoma	0.00999	0.0377				PTCH1	1
Carbohydrate Metabolism,Molecular Transport,Small Molecule Biochemistry	quantity	Quantity of chondroitin sulfate	0.00999	0.0377				XYLT1	1
Cellular Assembly and Organization	clustering	Clustering of telomeres	0.00999	0.0377				ATM	1
Cardiovascular System Development and Function	formation	Formation of vascular plexus	0.00999	0.0377				BCL6B	1
Cell Cycle,Connective Tissue Development and Function,DNA Replication, Recombination, and Repair	S phase checkpoint control	S phase checkpoint control of fibroblast cell lines	0.00999	0.0377				ATM	1
Cardiovascular System Development and Function,Cell Cycle,Skeletal and Muscular System Development and Function	mitosis	Mitosis of cardiomyocytes	0.00999	0.0377				JARID2	1
Organ Development,Reproductive System Development and Function	function	Function of placenta	0.00999	0.0377				STIP1	1
Cell-mediated Immune Response,Cellular Development,Cellular Function and Maintenance,Cellular Growth and Proliferation,Embryonic Development,Hematological System Development and Function,Hematopoiesis,Lymphoid Tissue Structure and Development,Organ Development,Organ Morphology,Organismal Development,Tissue Development,Tissue Morphology	expansion	Expansion of innate-like lymphocytes	0.00999	0.0377				ZBTB16	1
Molecular Transport,Nucleic Acid Metabolism,Small Molecule Biochemistry	quantity	Quantity of NADH	0.00999	0.0377				ATM	1
Cancer,Organismal Injury and Abnormalities,Renal and Urological Disease	chromophobe renal cell carcinoma	Primary chromophobe renal cell carcinoma	0.00999	0.0377				PDHB	1
Dental Disease,Digestive System Development and Function,Gastrointestinal Disease,Organismal Development,Organismal Injury and Abnormalities	fragility	Fragility of tooth	0.00999	0.0377				SLC4A4	1
Cell Death and Survival,Cellular Function and Maintenance	colony survival	Colony survival of melanoma cell lines	0.00999	0.0377				ATM	1
Ophthalmic Disease,Organismal Injury and Abnormalities	anterior adhesions of iris	Anterior adhesions of iris	0.00999	0.0377				ZEB1	1
Cell Cycle,DNA Replication, Recombination, and Repair	S phase checkpoint control	S phase checkpoint control of bone cancer cell lines	0.00999	0.0377				ATM	1
Cell-To-Cell Signaling and Interaction	response	Response of astrocytes	0.00999	0.0377				SLC4A4	1
Cell Cycle,DNA Replication, Recombination, and Repair	S phase checkpoint control	S phase checkpoint control of sarcoma cell lines	0.00999	0.0377				ATM	1
Cancer,Organismal Injury and Abnormalities,Reproductive System Disease	uterine serous papillary cancer	Uterine serous papillary cancer	0.0101	0.0379				RIPOR2,ZBTB16,ZEB1	3
Auditory Disease,Hereditary Disorder,Neurological Disease,Organismal Injury and Abnormalities	hereditary sensorineural hearing loss	Hereditary sensorineural hearing loss	0.0101	0.0381				LMX1A,RIPOR2	2
Cancer,Organismal Injury and Abnormalities,Renal and Urological Disease	urinary tract cancer	Urinary tract cancer	0.0104	0.039				ARPC2,ATM,GCC2,JARID2,MED12,NRP2,PDHB,PTCH1,SETBP1,SLC4A4,ZEB1	11
[truncated: 94 more rows]
